# Supplementary material for: Spatial omics representation and functional tissue module inference using graph Fourier transform
Source: bioRxiv preprint, doi:10.1101/2022.12.10.519929, version 3 (2023-03-21)
Supplement: Supp Table 2 [file 519929_file20.xlsx]

## Sheet: Gene from paper_deleteduplicate
Gene_symbol (M)	Reference	Species	Gene_symbol (H)	Original source
1810011H11Rik	Tasic_2016	M	C10orf128	Supplementary Table 6: Marker genes for transcriptomic cell types.
1810041L15Rik	Tasic_2016	M	SHISAL1	Supplementary Table 6: Marker genes for transcriptomic cell types.
4921511H03Rik	Tasic_2016	M	C7orf62	Supplementary Table 6: Marker genes for transcriptomic cell types.
6330403K07Rik	Tasic_2016	M	LOC728392	Supplementary Table 6: Marker genes for transcriptomic cell types.
Abcb1a	Tasic_2016	M	ABCB1A	Supplementary Table 6: Marker genes for transcriptomic cell types.
Abi3	Tasic_2016	M	ABI3	Supplementary Table 6: Marker genes for transcriptomic cell types.
Abo	Hodge	H	ABO	Figure 1; Figure 2; Figure 6; Figure 7; Extended Data Figure 1; Extended Data Figure 2; Extended Data Figure 3; Extended Data Figure 5; Extended Data Figure 9;
Ace2	Tasic_2016	M	ACE2	Supplementary Table 6: Marker genes for transcriptomic cell types.
Acsbg1	Ortiz	M	ACSBG1	Result:A reduced brain palette captures whole-brain organization-"the genes that best capture the global spatial signals"-266 genes
Acsbg1	Tasic_2016	M	ACSBG1	Supplementary Table 6: Marker genes for transcriptomic cell types.
Acsl6	Tasic_2016	M	ACSL6	Supplementary Table 6: Marker genes for transcriptomic cell types.
Acta2	Tasic_2018	M	ACTA2	Figure 1c
Acvr1c	Tasic_2016	M	ACVR1C	Supplementary Table 6: Marker genes for transcriptomic cell types.
Adamts18	Tasic_2016	M	ADAMTS18	Supplementary Table 6: Marker genes for transcriptomic cell types.
Adamts19	Tasic_2018	M	ADAMTS19	Figure 1c
Adamts2	Tasic_2016	M	ADAMTS2	Supplementary Table 6: Marker genes for transcriptomic cell types.
Adamts2	Tasic_2018	M	ADAMTS2	Figure 1c
Adamtsl1	Hodge	H	ADAMTSL1	Figure 1; Figure 4; Figure 6; Extended Data Figure 1; Extended Data Figure 2; Extended Data Figure 3; Extended Data Figure 4; Extended Data Figure 9;
Adarb1	Ortiz	M	ADARB1	Result:A reduced brain palette captures whole-brain organization-"the genes that best capture the global spatial signals"-266 genes
Adarb2	Hodge	H	ADARB2	Figure 1; Figure 4; Extended Data Figure 10;
Adcy1	Ortiz	M	ADCY1	Result:A reduced brain palette captures whole-brain organization-"the genes that best capture the global spatial signals"-266 genes
Adcyap1r1	Tasic_2016	M	ADCYAP1R1	Supplementary Table 6: Marker genes for transcriptomic cell types.
Adgrb2	Ortiz	M	ADGRB2	Result:A reduced brain palette captures whole-brain organization-"the genes that best capture the global spatial signals"-266 genes
Adgrg6	Hodge	H	ADGRG6	Figure 1; Figure 4; Figure 6; Extended Data Figure 1; Extended Data Figure 2; Extended Data Figure 3; Extended Data Figure 4; Extended Data Figure 9;
Adra2a	Maynard	M&H	ADRA2A	Supplementary Table 5: Using two lists of known layer-marker genes
Aebp1	Tasic_2016	M	AEBP1	Supplementary Table 6: Marker genes for transcriptomic cell types.
Agap2	Ortiz	M	AGAP2	Result:A reduced brain palette captures whole-brain organization-"the genes that best capture the global spatial signals"-266 genes
Agmat	Tasic_2018	M	AGMAT	Figure 1c
Agt	Ortiz	M	AGT	Result:A reduced brain palette captures whole-brain organization-"the genes that best capture the global spatial signals"-266 genes
Ahi1	Ortiz	M	AHI1	Figure 3;
Ahnak	Tasic_2016	M	AHNAK	Supplementary Table 6: Marker genes for transcriptomic cell types.
AI467606	Tasic_2016	M	C16orf54	Supplementary Table 6: Marker genes for transcriptomic cell types.
Aif1	Tasic_2016	M	AIF1	Supplementary Table 6: Marker genes for transcriptomic cell types.
Akr1c18	Tasic_2016	M	AKR1C3	Supplementary Table 6: Marker genes for transcriptomic cell types.
Akr1c18	Tasic_2018	M	AKR1C3	Figure 1c
Akr1c2	Maynard	H	AKR1C2	Supplementary Table 5: Using two lists of known layer-marker genes
Akr1c3	Maynard	H	AKR1C3	Supplementary Table 5: Using two lists of known layer-marker genes
Aldh1a1	Ortiz	M	ALDH1A1	Result:A reduced brain palette captures whole-brain organization-"the genes that best capture the global spatial signals"-266 genes
Aldh1l1	Tasic_2016	M	ALDH1L1	Supplementary Table 6: Marker genes for transcriptomic cell types.
Aldoc	Tasic_2016	M	ALDOC	Supplementary Table 6: Marker genes for transcriptomic cell types.
Aloxe3	Tasic_2016	M	ALOXE3	Supplementary Table 6: Marker genes for transcriptomic cell types.
Ano3	Tasic_2016	M	ANO3	Supplementary Table 6: Marker genes for transcriptomic cell types.
Anxa1	Tasic_2016	M	ANXA1	Supplementary Table 6: Marker genes for transcriptomic cell types.
Anxa1	Maynard	H	ANXA1	Supplementary Table 5: Using two lists of known layer-marker genes
Anxa11	Tasic_2016	M	ANXA11	Supplementary Table 6: Marker genes for transcriptomic cell types.
Apod	Ortiz	M	APOD	Result:A reduced brain palette captures whole-brain organization-"the genes that best capture the global spatial signals"-266 genes
Apoe	Ortiz	M	APOE	Result:A reduced brain palette captures whole-brain organization-"the genes that best capture the global spatial signals"-266 genes
Aqp4	Ortiz	M	AQP4	Result:A reduced brain palette captures whole-brain organization-"the genes that best capture the global spatial signals"-266 genes
Aqp4	Tasic_2016	M	AQP4	Figure 1c-"major known marker genes"
Aqp4	Maynard	H	AQP4	Figure 4ae; "We also confirmed laminar enrichment of several genes identified as cell-type mark ers in specific cortical layers by Hodge et al. (LAMP5, AQP4 and FREM3)"
Aqp4	Hodge	H	AQP4	Figure 5;
Aqp4	Tasic_2018	M	AQP4	Figure 1c
Aqp5	Tasic_2018	M	AQP5	Figure 1c
Arc	Ortiz	M	ARC	Result:A reduced brain palette captures whole-brain organization-"the genes that best capture the global spatial signals"-266 genes
Arc	Tasic_2016	M	ARC	Supplementary Table 6: Marker genes for transcriptomic cell types.
Arhgap25	Tasic_2016	M	ARHGAP25	Supplementary Table 6: Marker genes for transcriptomic cell types.
Arhgap25	Tasic_2018	M	ARHGAP25	Figure 1c
Arhgap36	Tasic_2018	M	ARHGAP36	Figure 1c
Arhgef3	Tasic_2016	M	ARHGEF3	Supplementary Table 6: Marker genes for transcriptomic cell types.
Arpp21	Ortiz	M	ARPP21	Result:A reduced brain palette captures whole-brain organization-"the genes that best capture the global spatial signals"-266 genes
Aspa	Tasic_2016	M	ASPA	Supplementary Table 6: Marker genes for transcriptomic cell types.
Atp1a1	Ortiz	M	ATP1A1	Result:A reduced brain palette captures whole-brain organization-"the genes that best capture the global spatial signals"-266 genes
Atp2b1	Ortiz	M	ATP2B1	Result:A reduced brain palette captures whole-brain organization-"the genes that best capture the global spatial signals"-266 genes
Atp2b4	Maynard	M&H	ATP2B4	Supplementary Table 5: Using two lists of known layer-marker genes
Atp5md	Ortiz	M	USMG5	Result:A reduced brain palette captures whole-brain organization-"the genes that best capture the global spatial signals"-266 genes
B3galt2	Maynard	M&H	B3GALT2	Supplementary Table 5: Using two lists of known layer-marker genes
B3gat2	Hodge	H	B3GAT2	Figure 1; Figure 4; Figure 6; Extended Data Figure 1; Extended Data Figure 2; Extended Data Figure 3; Extended Data Figure 4; Extended Data Figure 9;
Bace2	Tasic_2016	M	BACE2	Supplementary Table 6: Marker genes for transcriptomic cell types.
Bage2	Hodge	H	BAGE2	Figure 1; Figure 4; Figure 6; Extended Data Figure 1; Extended Data Figure 2; Extended Data Figure 3; Extended Data Figure 4; Extended Data Figure 9;
Barx2	Tasic_2016	M	BARX2	Supplementary Table 6: Marker genes for transcriptomic cell types.
Basp1	Ortiz	M	BASP1	Result:A reduced brain palette captures whole-brain organization-"the genes that best capture the global spatial signals"-266 genes
Batf3	Tasic_2018	M	BATF3	Figure 1c; Figure 4c-Marker gene expression distributions within each cluster are represented by violin plots
Bcan	Tasic_2016	M	BCAN	Supplementary Table 6: Marker genes for transcriptomic cell types.
Bcar3	Tasic_2016	M	BCAR3	Supplementary Table 6: Marker genes for transcriptomic cell types.
Bcl11B	Maynard	M&H	BCL11B	Supplementary Table 5: Using two lists of known layer-marker genes
Bcl6	Ortiz	M	BCL6	Figure 3;
Bdnf	Tasic_2016	M	BDNF	Supplementary Table 6: Marker genes for transcriptomic cell types.
Bend5	Maynard	M&H	BEND5	Supplementary Table 5: Using two lists of known layer-marker genes
Bglap2	Tasic_2016	M	BGLAP2	Supplementary Table 6: Marker genes for transcriptomic cell types.
Bgn	Tasic_2016	M	BGN	Figure 1c-"major known marker genes"; Supplementary Table 6: Marker genes for transcriptomic cell types.
Bhlhe22	Ortiz	M	BHLHE22	Result:A reduced brain palette captures whole-brain organization-"the genes that best capture the global spatial signals"-266 genes
Bhlhe22	Maynard	M&H	BHLHE22	Supplementary Table 5: Using two lists of known layer-marker genes
Brca1	Tasic_2016	M	BRCA1	Supplementary Table 6: Marker genes for transcriptomic cell types.
Brinp3	Tasic_2018	M	BRINP3	Figure 1c
C1qa	Tasic_2016	M	C1QA	Supplementary Table 6: Marker genes for transcriptomic cell types.
C1qb	Tasic_2016	M	C1QB	Supplementary Table 6: Marker genes for transcriptomic cell types.
C1qc	Tasic_2016	M	C1QC	Supplementary Table 6: Marker genes for transcriptomic cell types.
C1ql1	Tasic_2018	M	C1QL1	Figure 1c
C1ql2	Maynard	H	C1QL2	Supplementary Table 5: Using two lists of known layer-marker genes
C1ql2	Tasic_2018	M	C1QL2	Figure 1c
C1ql3	Tasic_2016	M	C1QL3	Supplementary Table 6: Marker genes for transcriptomic cell types.
C1ql3	Hodge	H	C1QL3	Figure 1; Figure 6; Figure 7; Extended Data Figure 1; Extended Data Figure 2; Extended Data Figure 3; Extended Data Figure 5; Extended Data Figure 9;
C1qtnf7	Tasic_2016	M	C1QTNF7	Supplementary Table 6: Marker genes for transcriptomic cell types.
C1ra	Hodge	H	C1R	Figure 1; Figure 2; Figure 6; Figure 7; Extended Data Figure 1; Extended Data Figure 2; Extended Data Figure 3; Extended Data Figure 5; Extended Data Figure 9;
Cab39l	Ortiz	M	CAB39L	Result:A reduced brain palette captures whole-brain organization-"the genes that best capture the global spatial signals"-266 genes
Cabp7	Ortiz	M	CABP7	Result:A reduced brain palette captures whole-brain organization-"the genes that best capture the global spatial signals"-266 genes
Cacna1e	Maynard	H	CACNA1E	Supplementary Table 5: Using two lists of known layer-marker genes
Cacna2d3	Tasic_2016	M	CACNA2D3	Supplementary Table 6: Marker genes for transcriptomic cell types.
Cacng4	Tasic_2016	M	CACNG4	Supplementary Table 6: Marker genes for transcriptomic cell types.
Cadm1	Ortiz	M	CADM1	Result:A reduced brain palette captures whole-brain organization-"the genes that best capture the global spatial signals"-266 genes
Cadps2	Tasic_2016	M	CADPS2	Supplementary Table 6: Marker genes for transcriptomic cell types.
Calb1	Ortiz	M	CALB1	Result:A reduced brain palette captures whole-brain organization-"the genes that best capture the global spatial signals"-266 genes
Calb1	Tasic_2016	M	CALB1	Supplementary Table 6: Marker genes for transcriptomic cell types.
Calb1	Maynard	M&H	CALB1	Supplementary Table 5: Using two lists of known layer-marker genes
Calb1	Hodge	H	CALB1	Figure 1; Figure 4; Figure 6; Extended Data Figure 1; Extended Data Figure 2; Extended Data Figure 3; Extended Data Figure 4; Extended Data Figure 9;
Calb1	Tasic_2018	M	CALB1	Figure 1c
Calb2	Ortiz	M	CALB2	Result:A reduced brain palette captures whole-brain organization-"the genes that best capture the global spatial signals"-266 genes
Calb2	Tasic_2018	M	CALB2	Figure 1c
Calca	Tasic_2016	M	CALCA	Supplementary Table 6: Marker genes for transcriptomic cell types.
Caln1	Tasic_2016	M	CALN1	Supplementary Table 6: Marker genes for transcriptomic cell types.
Camk2a	Ortiz	M	CAMK2A	Result:A reduced brain palette captures whole-brain organization-"the genes that best capture the global spatial signals"-266 genes
Camk2n1	Ortiz	M	CAMK2N1	Result:A reduced brain palette captures whole-brain organization-"the genes that best capture the global spatial signals"-266 genes
Camk4	Ortiz	M	CAMK4	Result:A reduced brain palette captures whole-brain organization-"the genes that best capture the global spatial signals"-266 genes
Camkk2	Ortiz	M	CAMKK2	Result:A reduced brain palette captures whole-brain organization-"the genes that best capture the global spatial signals"-266 genes
Car1(ca1)	Hodge	H	CA1	Figure 1; Figure 4; Figure 6; Extended Data Figure 1; Extended Data Figure 2; Extended Data Figure 3; Extended Data Figure 4; Extended Data Figure 9;
Car10	Tasic_2018	M	CA10	Figure 1c
Car12	Tasic_2016	M	CA12	Supplementary Table 6: Marker genes for transcriptomic cell types.
Car3	Tasic_2018	M	CA3	Figure 1c
Car4	Tasic_2016	M	CA4	Supplementary Table 6: Marker genes for transcriptomic cell types.
Car8	Ortiz	M	CA8	Result:A reduced brain palette captures whole-brain organization-"the genes that best capture the global spatial signals"-266 genes
Carm1	Hodge	H	CARM1	Figure 1; Figure 2; Figure 6; Figure 7; Figure 8; Extended Data Figure 1; Extended Data Figure 2; Extended Data Figure 3; Extended Data Figure 5; Extended Data Figure 8; Extended Data Figure 9;
Cartpt	Tasic_2016	M	CARTPT	Supplementary Table 6: Marker genes for transcriptomic cell types.
Cartpt	Maynard	M&H	CARTPT	Supplementary Table 5: Using two lists of known layer-marker genes
Casq2	Tasic_2016	M	CASQ2	Supplementary Table 6: Marker genes for transcriptomic cell types.
Cbln1	Hodge	H	CBLN1	Figure 1; Figure 4; Figure 6; Extended Data Figure 1; Extended Data Figure 2; Extended Data Figure 3; Extended Data Figure 4; Extended Data Figure 9;
Cbln2	Maynard	M&H	CBLN2	Supplementary Table 5: Using two lists of known layer-marker genes
Cbln4	Tasic_2018	M	CBLN4	Figure 1c
Cbs	Tasic_2016	M	CBS	Supplementary Table 6: Marker genes for transcriptomic cell types.
Ccdc109b	Tasic_2016	M	CCDC109B	Supplementary Table 6: Marker genes for transcriptomic cell types.
Ccdc136	Ortiz	M	CCDC136	Result:A reduced brain palette captures whole-brain organization-"the genes that best capture the global spatial signals"-266 genes
Ccdc184	Hodge	H	CCDC184	Figure 1; Figure 4; Figure 6; Extended Data Figure 1; Extended Data Figure 2; Extended Data Figure 3; Extended Data Figure 4; Extended Data Figure 9;
Cck	Ortiz	M	CCK	Result:A reduced brain palette captures whole-brain organization-"the genes that best capture the global spatial signals"-266 genes
Cck	Maynard	M&H	CCK	Supplementary Table 5: Using two lists of known layer-marker genes
Ccn2	Ortiz	M	CTGF	Figure 3;
Ccnb1	Tasic_2018	M	CCNB1	Figure 1c
Ccnd2	Ortiz	M	CCND2	Result:A reduced brain palette captures whole-brain organization-"the genes that best capture the global spatial signals"-266 genes
Cd14	Tasic_2016	M	CD14	Supplementary Table 6: Marker genes for transcriptomic cell types.
Cd24a	Ortiz	M	CD24A	Result:A reduced brain palette captures whole-brain organization-"the genes that best capture the global spatial signals"-266 genes
Cd34	Tasic_2016	M	CD34	Supplementary Table 6: Marker genes for transcriptomic cell types.
Cd53	Tasic_2016	M	CD53	Supplementary Table 6: Marker genes for transcriptomic cell types.
Cd63	Tasic_2016	M	CD63	Supplementary Table 6: Marker genes for transcriptomic cell types.
Cd7	Tasic_2016	M	CD7	Supplementary Table 6: Marker genes for transcriptomic cell types.
Cd74	Tasic_2018	M	CD74	Figure 1c
Cd93	Tasic_2016	M	CD93	Supplementary Table 6: Marker genes for transcriptomic cell types.
Cdca7	Tasic_2016	M	CDCA7	Supplementary Table 6: Marker genes for transcriptomic cell types.
Cdh12	Tasic_2016	M	CDH12	Supplementary Table 6: Marker genes for transcriptomic cell types.
Cdh12	Hodge	H	CDH12	Figure 4; Figure 6; Extended Data Figure 1; Extended Data Figure 2; Extended Data Figure 3; Extended Data Figure 4;
Cdh13	Tasic_2016	M	CDH13	Supplementary Table 6: Marker genes for transcriptomic cell types.
Cdh13	Tasic_2018	M	CDH13	Figure 1c
Cdh24	Maynard	M&H	CDH24	Supplementary Table 5: Using two lists of known layer-marker genes
Chat	Tasic_2018	M	CHAT	Figure 1c
Chgb	Ortiz	M	CHGB	Result:A reduced brain palette captures whole-brain organization-"the genes that best capture the global spatial signals"-266 genes
Chn2	Ortiz	M	CHN2	Result:A reduced brain palette captures whole-brain organization-"the genes that best capture the global spatial signals"-266 genes
Chodl	Tasic_2018	M	CHODL	Figure 1c
Chrdl1	Tasic_2016	M	CHRDL1	Supplementary Table 6: Marker genes for transcriptomic cell types.
Chrm2	Hodge	H	CHRM2	Figure 1; Figure 4; Figure 6; Extended Data Figure 1; Extended Data Figure 2; Extended Data Figure 3; Extended Data Figure 4; Extended Data Figure 9;
Chrna2	Tasic_2016	M	CHRNA2	Supplementary Table 6: Marker genes for transcriptomic cell types.
Chrna2	Tasic_2018	M	CHRNA2	Figure 1c
Chrna3	Maynard	H	CHRNA3	Supplementary Table 5: Using two lists of known layer-marker genes
Chrna4	Hodge	H	CHRNA4	Figure 1; Figure 4; Figure 6; Extended Data Figure 1; Extended Data Figure 2; Extended Data Figure 3; Extended Data Figure 4; Extended Data Figure 9;
Chrna6	Hodge	H	CHRNA6	Figure 1; Figure 4; Figure 6; Extended Data Figure 1; Extended Data Figure 2; Extended Data Figure 3; Extended Data Figure 4;
Chrna6	Tasic_2018	M	CHRNA6	Figure 1c; Figure 4c-Marker gene expression distributions within each cluster are represented by violin plots
Chrna7	Maynard	M&H	CHRNA7	Supplementary Table 5: Using two lists of known layer-marker genes
Chrnb3	Tasic_2016	M	CHRNB3	Supplementary Table 6: Marker genes for transcriptomic cell types.
Cidea	Tasic_2016	M	CIDEA	Supplementary Table 6: Marker genes for transcriptomic cell types.
Cited1	Tasic_2016	M	CITED1	Supplementary Table 6: Marker genes for transcriptomic cell types.
Cldn11	Ortiz	M	CLDN11	Result:A reduced brain palette captures whole-brain organization-"the genes that best capture the global spatial signals"-266 genes
Cldn11	Tasic_2016	M	CLDN11	Supplementary Table 6: Marker genes for transcriptomic cell types.
Clic5	Tasic_2016	M	CLIC5	Supplementary Table 6: Marker genes for transcriptomic cell types.
Clic6	Ortiz	M	CLIC6	Result:A reduced brain palette captures whole-brain organization-"the genes that best capture the global spatial signals"-266 genes
Clrn1	Tasic_2018	M	CLRN1	Figure 1c
Cnih2	Ortiz	M	CNIH2	Result:A reduced brain palette captures whole-brain organization-"the genes that best capture the global spatial signals"-266 genes
Cnmd	Tasic_2018	M	CNMD	Figure 1c
Cnn2	Tasic_2016	M	CNN2	Supplementary Table 6: Marker genes for transcriptomic cell types.
Cnp	Ortiz	M	CNP	Result:A reduced brain palette captures whole-brain organization-"the genes that best capture the global spatial signals"-266 genes
Cnr1	Ortiz	M	CNR1	Result:A reduced brain palette captures whole-brain organization-"the genes that best capture the global spatial signals"-266 genes
Cnr1	Tasic_2016	M	CNR1	Supplementary Table 6: Marker genes for transcriptomic cell types.
Cnr1	Maynard	M&H	CNR1	Supplementary Table 5: Using two lists of known layer-marker genes
Cntn2	Tasic_2016	M	CNTN2	Supplementary Table 6: Marker genes for transcriptomic cell types.
Cntn4	Tasic_2016	M	CNTN4	Supplementary Table 6: Marker genes for transcriptomic cell types.
Cntn6	Maynard	M&H	CNTN6	Supplementary Table 5: Using two lists of known layer-marker genes
Col14a1	Tasic_2016	M	COL14A1	Supplementary Table 6: Marker genes for transcriptomic cell types.
Col15a1	Tasic_2018	M	COL15A1	Figure 1c
Col18a1	Tasic_2018	M	COL18A1	Figure 1c
Col22a1	Hodge	H	COL22A1	Figure 1; Figure 2; Figure 6; Figure 7; Extended Data Figure 1; Extended Data Figure 2; Extended Data Figure 3; Extended Data Figure 5; Extended Data Figure 9;
Col23a1	Tasic_2018	M	COL23A1	Figure 1c
Col24a1	Tasic_2016	M	COL24A1	Supplementary Table 6: Marker genes for transcriptomic cell types.
Col24a1	Maynard	M&H	COL24A1	Supplementary Table 5: Using two lists of known layer-marker genes
Col25a1	Tasic_2016	M	COL25A1	Supplementary Table 6: Marker genes for transcriptomic cell types.
Col27a1	Tasic_2018	M	COL27A1	Figure 1c
Col5a2	Hodge	H	COL5A2	Figure 3; Extended Data Figure 7; Extended Data Figure 8;
Col6a1	Tasic_2016	M	COL6A1	Supplementary Table 6: Marker genes for transcriptomic cell types.
Col6a1	Maynard	M&H	COL6A1	Supplementary Table 5: Using two lists of known layer-marker genes
Col6a1	Tasic_2018	M	COL6A1	Figure 1c
Col8a1	Tasic_2018	M	COL8A1	Figure 1c
Cops9	Ortiz	M	COPS9	Result:A reduced brain palette captures whole-brain organization-"the genes that best capture the global spatial signals"-266 genes
Coro6	Tasic_2016	M	CORO6	Supplementary Table 6: Marker genes for transcriptomic cell types.
Cort	Tasic_2016	M	CORT	Supplementary Table 6: Marker genes for transcriptomic cell types.
Cox5a	Ortiz	M	COX5A	Result:A reduced brain palette captures whole-brain organization-"the genes that best capture the global spatial signals"-266 genes
Cox6a2	Tasic_2016	M	COX6A2	Supplementary Table 6: Marker genes for transcriptomic cell types.
Cpa6	Tasic_2018	M	CPA6	Figure 1c
Cplx1	Ortiz	M	CPLX1	Result:A reduced brain palette captures whole-brain organization-"the genes that best capture the global spatial signals"-266 genes
Cplx3	Ortiz	M	CPLX3	Result:A reduced brain palette captures whole-brain organization-"the genes that best capture the global spatial signals"-266 genes
Cplx3	Tasic_2016	M	CPLX3	Supplementary Table 6: Marker genes for transcriptomic cell types.
Cpne2	Tasic_2016	M	CPNE2	Supplementary Table 6: Marker genes for transcriptomic cell types.
Cpne4	Ortiz	M	CPNE4	Result:A reduced brain palette captures whole-brain organization-"the genes that best capture the global spatial signals"-266 genes
Cpne6	Ortiz	M	CPNE6	Result:A reduced brain palette captures whole-brain organization-"the genes that best capture the global spatial signals"-266 genes
Cpne7	Tasic_2016	M	CPNE7	Supplementary Table 6: Marker genes for transcriptomic cell types.
Cpne7	Maynard	M&H	CPNE7	Supplementary Table 5: Using two lists of known layer-marker genes
Cpne7	Tasic_2018	M	CPNE7	Figure 1c
Crabp1	Hodge	H	CRABP1	Figure 1; Figure 2; Figure 6; Figure 7; Extended Data Figure 1; Extended Data Figure 2; Extended Data Figure 3; Extended Data Figure 5; Extended Data Figure 9;
Crh	Tasic_2016	M	CRH	Supplementary Table 6: Marker genes for transcriptomic cell types.
Crh	Tasic_2018	M	CRH	Figure 1c
Crhr2	Tasic_2018	M	CRHR2	Figure 1c
Crim1	Maynard	M&H	CRIM1	Supplementary Table 5: Using two lists of known layer-marker genes
Crispld2	Tasic_2016	M	CRISPLD2	Supplementary Table 6: Marker genes for transcriptomic cell types.
Crispld2	Tasic_2018	M	CRISPLD2	Figure 1c
Cryab	Tasic_2016	M	CRYAB	Supplementary Table 6: Marker genes for transcriptomic cell types.
Crym	Ortiz	M	CRYM	Result:A reduced brain palette captures whole-brain organization-"the genes that best capture the global spatial signals"-266 genes
Crym	Tasic_2016	M	CRYM	Supplementary Table 6: Marker genes for transcriptomic cell types.
Crym	Maynard	M&H	CRYM	Supplementary Table 5: Using two lists of known layer-marker genes
Crym	Tasic_2018	M	CRYM	Figure 4c-Marker gene expression distributions within each cluster are represented by violin plots
Csf1r	Tasic_2016	M	CSF1R	Supplementary Table 6: Marker genes for transcriptomic cell types.
Cspg4	Tasic_2016	M	CSPG4	Supplementary Table 6: Marker genes for transcriptomic cell types.
Csrp1	Ortiz	M	CSRP1	Result:A reduced brain palette captures whole-brain organization-"the genes that best capture the global spatial signals"-266 genes
Ctgf	Ortiz	M	CTGF	Figure 3;
Ctgf	Tasic_2016	M	CTGF	Supplementary Table 6: Marker genes for transcriptomic cell types.
Ctgf	Maynard	M&H	CTGF	Supplementary Table 5: Using two lists of known layer-marker genes
Ctla2a	Tasic_2018	M	CTLA2A	Figure 1c
Ctxn3	Tasic_2016	M	CTXN3	Supplementary Table 6: Marker genes for transcriptomic cell types.
Ctxn3	Tasic_2018	M	CTXN3	Figure 1c
cux1	Maynard	M&H	CUX1	Supplementary Table 5: Using two lists of known layer-marker genes
Cux2	Ortiz	M	CUX2	Figure 3;
Cux2	Maynard	M&H	CUX2	Supplementary Table 5: Using two lists of known layer-marker genes
Cux2	Tasic_2018	M	CUX2	Figure 4c-Marker gene expression distributions within each cluster are represented by violin plots
Cx3cr1	Tasic_2016	M	CX3CR1	Supplementary Table 6: Marker genes for transcriptomic cell types.
Cxcl14	Tasic_2016	M	CXCL14	Supplementary Table 6: Marker genes for transcriptomic cell types.
Cxcl14	Maynard	M&H	CXCL14	Supplementary Table 5: Using two lists of known layer-marker genes
Cyb5r2	Tasic_2016	M	CYB5R2	Supplementary Table 6: Marker genes for transcriptomic cell types.
Cyp39a1	Maynard	M&H	CYP39A1	Supplementary Table 5: Using two lists of known layer-marker genes
Cyr61	Maynard	M&H	CYR61	Supplementary Table 5: Using two lists of known layer-marker genes
Cytl1	Tasic_2018	M	CYTL1	Figure 1c
Dapk2	Hodge	H	DAPK2	Figure 1; Figure 2; Figure 6; Figure 7; Extended Data Figure 1; Extended Data Figure 2; Extended Data Figure 3; Extended Data Figure 5; Extended Data Figure 9;
Dbi	Ortiz	M	DBI	Result:A reduced brain palette captures whole-brain organization-"the genes that best capture the global spatial signals"-266 genes
Dbp	Hodge	H	DBP	Figure 1; Figure 4; Figure 6; Extended Data Figure 1; Extended Data Figure 2; Extended Data Figure 3; Extended Data Figure 4; Extended Data Figure 9;
Dcn	Ortiz	M	DCN	Result:A reduced brain palette captures whole-brain organization-"the genes that best capture the global spatial signals"-266 genes
Dcstamp	Hodge	H	DCSTAMP	Figure 1; Figure 2; Figure 6; Figure 7; Extended Data Figure 1; Extended Data Figure 2; Extended Data Figure 3; Extended Data Figure 5; Extended Data Figure 9;
Dct	Tasic_2016	M	DCT	Supplementary Table 6: Marker genes for transcriptomic cell types.
Ddah1	Tasic_2016	M	DDAH1	Supplementary Table 6: Marker genes for transcriptomic cell types.
Ddc	Ortiz	M	DDC	Result:A reduced brain palette captures whole-brain organization-"the genes that best capture the global spatial signals"-266 genes
Ddit4l	Tasic_2016	M	DDIT4L	Supplementary Table 6: Marker genes for transcriptomic cell types.
Ddn	Ortiz	M	DDN	Result:A reduced brain palette captures whole-brain organization-"the genes that best capture the global spatial signals"-266 genes
Depdc7	Tasic_2016	M	DEPDC7	Supplementary Table 6: Marker genes for transcriptomic cell types.
Deptor	Tasic_2016	M	DEPTOR	Supplementary Table 6: Marker genes for transcriptomic cell types.
Deptor	Tasic_2018	M	DEPTOR	Figure 4c-Marker gene expression distributions within each cluster are represented by violin plots
Dgkb	Tasic_2016	M	DGKB	Supplementary Table 6: Marker genes for transcriptomic cell types.
Dgkz	Ortiz	M	DGKZ	Result:A reduced brain palette captures whole-brain organization-"the genes that best capture the global spatial signals"-266 genes
Diaph3	Maynard	M&H	DIAPH3	Supplementary Table 5: Using two lists of known layer-marker genes
Diras2	Ortiz	M	DIRAS2	Result:A reduced brain palette captures whole-brain organization-"the genes that best capture the global spatial signals"-266 genes
Dkk3	Ortiz	M	DKK3	Result:A reduced brain palette captures whole-brain organization-"the genes that best capture the global spatial signals"-266 genes
Dkk3	Maynard	M&H	DKK3	Supplementary Table 5: Using two lists of known layer-marker genes
Dmp1	Tasic_2016	M	DMP1	Supplementary Table 6: Marker genes for transcriptomic cell types.
Dmrtb1	Tasic_2018	M	DMRTB1	Figure 1c
Dnase1l3	Tasic_2016	M	DNASE1L3	Supplementary Table 6: Marker genes for transcriptomic cell types.
Dner	Ortiz	M	DNER	Result:A reduced brain palette captures whole-brain organization-"the genes that best capture the global spatial signals"-266 genes
Dock5	Tasic_2018	M	DOCK5	Figure 1c
Drd1a	Tasic_2016	M	DRD1	Supplementary Table 6: Marker genes for transcriptomic cell types.
dtx4	Maynard	M&H	DTX4	Supplementary Table 5: Using two lists of known layer-marker genes
Dusp1	Ortiz	M	DUSP1	Result:A reduced brain palette captures whole-brain organization-"the genes that best capture the global spatial signals"-266 genes
E130309F12Rik	Tasic_2016	M	LPPR1	Supplementary Table 6: Marker genes for transcriptomic cell types.
Edn3	Tasic_2016	M	EDN3	Supplementary Table 6: Marker genes for transcriptomic cell types.
Ednrb	Tasic_2016	M	EDNRB	Supplementary Table 6: Marker genes for transcriptomic cell types.
Efcab6	Tasic_2016	M	EFCAB6	Supplementary Table 6: Marker genes for transcriptomic cell types.
Efemp1	Tasic_2016	M	EFEMP1	Supplementary Table 6: Marker genes for transcriptomic cell types.
Efemp1	Tasic_2018	M	EFEMP1	Figure 1c
Efhd2	Ortiz	M	EFHD2	Result:A reduced brain palette captures whole-brain organization-"the genes that best capture the global spatial signals"-266 genes
Egln3	Tasic_2016	M	EGLN3	Supplementary Table 6: Marker genes for transcriptomic cell types.
Egr1	Ortiz	M	EGR1	Result:A reduced brain palette captures whole-brain organization-"the genes that best capture the global spatial signals"-266 genes
Egr4	Ortiz	M	EGR4	Result:A reduced brain palette captures whole-brain organization-"the genes that best capture the global spatial signals"-266 genes
Eltd1	Tasic_2016	M	ELTD1	Supplementary Table 6: Marker genes for transcriptomic cell types.
Eml1	Tasic_2016	M	EML1	Supplementary Table 6: Marker genes for transcriptomic cell types.
Enah	Ortiz	M	ENAH	Result:A reduced brain palette captures whole-brain organization-"the genes that best capture the global spatial signals"-266 genes
Enc1	Ortiz	M	ENC1	Result:A reduced brain palette captures whole-brain organization-"the genes that best capture the global spatial signals"-266 genes
Endou	Tasic_2016	M	ENDOU	Supplementary Table 6: Marker genes for transcriptomic cell types.
Endou	Tasic_2018	M	ENDOU	Figure 1c
Enpp2	Tasic_2016	M	ENPP2	Supplementary Table 6: Marker genes for transcriptomic cell types.
Enpp6	Tasic_2016	M	ENPP6	Supplementary Table 6: Marker genes for transcriptomic cell types.
Epha4	Ortiz	M	EPHA4	Result:A reduced brain palette captures whole-brain organization-"the genes that best capture the global spatial signals"-266 genes
Ermn	Ortiz	M	ERMN	Result:A reduced brain palette captures whole-brain organization-"the genes that best capture the global spatial signals"-266 genes
Esm1	Tasic_2018	M	ESM1	Figure 1c
Esr1	Hodge	H	ESR1	Figure 1; Figure 2; Figure 6; Figure 7; Extended Data Figure 1; Extended Data Figure 2; Extended Data Figure 3; Extended Data Figure 5; Extended Data Figure 9;
Etv1	Tasic_2016	M	ETV1	Supplementary Table 6: Marker genes for transcriptomic cell types.
Etv1	Maynard	M&H	ETV1	Supplementary Table 5: Using two lists of known layer-marker genes
Etv1	Tasic_2018	M	ETV1	Figure 1c
Exosc7	Tasic_2016	M	EXOSC7	Supplementary Table 6: Marker genes for transcriptomic cell types.
Eya1	Tasic_2018	M	EYA1	Figure 1c
F3	Tasic_2016	M	F3	Supplementary Table 6: Marker genes for transcriptomic cell types.
Fam107a	Tasic_2016	M	FAM107A	Supplementary Table 6: Marker genes for transcriptomic cell types.
Fam114a1	Tasic_2018	M	FAM114A1	Figure 1c
Fam131a	Ortiz	M	FAM131A	Result:A reduced brain palette captures whole-brain organization-"the genes that best capture the global spatial signals"-266 genes
Fam163b	Ortiz	M	FAM163B	Result:A reduced brain palette captures whole-brain organization-"the genes that best capture the global spatial signals"-266 genes
Fam19a1	Tasic_2016	M	FAM19A1	Supplementary Table 6: Marker genes for transcriptomic cell types.
Fam3c	Maynard	M&H	FAM3C	Supplementary Table 5: Using two lists of known layer-marker genes
Fam46a	Tasic_2016	M	FAM46A	Supplementary Table 6: Marker genes for transcriptomic cell types.
Fam84b	Tasic_2016	M	FAM84B	Supplementary Table 6: Marker genes for transcriptomic cell types.
Fas	Tasic_2016	M	FAS	Supplementary Table 6: Marker genes for transcriptomic cell types.
Fcgr3	Tasic_2016	M	FCGR3	Supplementary Table 6: Marker genes for transcriptomic cell types.
Fezf2	Maynard	M&H	FEZF2	Supplementary Table 5: Using two lists of known layer-marker genes
Fezf2	Hodge	H	FEZF2	Figure 1; Figure 2; Figure 6; Figure 7; Extended Data Figure 1; Extended Data Figure 2; Extended Data Figure 5; Extended Data Figure 9;
Fezf2	Tasic_2018	M	FEZF2	Figure 1c
Fgf10	Hodge	H	FGF10	Figure 1; Figure 2; Figure 6; Figure 7; Extended Data Figure 1; Extended Data Figure 2; Extended Data Figure 3; Extended Data Figure 5; Extended Data Figure 9;
Fgfr3	Hodge	H	FGFR3	Figure 1; Figure 5; Figure 6; Extended Data Figure 1; Extended Data Figure 2;
Fibin	Tasic_2018	M	FIBIN	Figure 1c
Fign	Tasic_2016	M	FIGN	Supplementary Table 6: Marker genes for transcriptomic cell types.
Filip1l	Hodge	H	FILIP1L	Figure 1; Figure 2; Figure 6; Figure 7; Extended Data Figure 1; Extended Data Figure 2; Extended Data Figure 3; Extended Data Figure 5; Extended Data Figure 9;
Fli1	Tasic_2016	M	FLI1	Supplementary Table 6: Marker genes for transcriptomic cell types.
Flt1	Tasic_2016	M	FLT1	Figure 1c-"major known marker genes"; Supplementary Table 6: Marker genes for transcriptomic cell types.
Fn1	Ortiz	M	FN1	Result:A reduced brain palette captures whole-brain organization-"the genes that best capture the global spatial signals"-266 genes
Folr1	Ortiz	M	FOLR1	Result:A reduced brain palette captures whole-brain organization-"the genes that best capture the global spatial signals"-266 genes
Fos	Ortiz	M	FOS	Result:A reduced brain palette captures whole-brain organization-"the genes that best capture the global spatial signals"-266 genes
Fos	Tasic_2016	M	FOS	Supplementary Table 6: Marker genes for transcriptomic cell types.
Fosb	Tasic_2016	M	FOSB	Supplementary Table 6: Marker genes for transcriptomic cell types.
Foxo1	Tasic_2016	M	FOXO1	Supplementary Table 6: Marker genes for transcriptomic cell types.
Foxo1	Maynard	M&H	FOXO1	Supplementary Table 5: Using two lists of known layer-marker genes
Foxp2	Ortiz	M	FOXP2	Figure 3;
Foxp2	Tasic_2016	M	FOXP2	Figure 1c-"major known marker genes"
Foxp2	Maynard	M&H	FOXP2	Supplementary Table 5: Using two lists of known layer-marker genes
Foxp2	Tasic_2018	M	FOXP2	Figure 4c-Marker gene expression distributions within each cluster are represented by violin plots
Frem1	Tasic_2016	M	FREM1	Supplementary Table 6: Marker genes for transcriptomic cell types.
Frem3	Hodge	H	FREM3	Figure 1; Figure 2; Figure 4; Figure 7; Extended Data Figure 1; Extended Data Figure 2; Extended Data Figure 3; Extended Data Figure 5; Extended Data Figure 8; Extended Data Figure 9;
Frmd7	Tasic_2016	M	FRMD7	Supplementary Table 6: Marker genes for transcriptomic cell types.
Frzb	Hodge	H	FRZB	Figure 1; Figure 4; Figure 6; Extended Data Figure 1; Extended Data Figure 2; Extended Data Figure 3; Extended Data Figure 4; Extended Data Figure 9;
Fst	Tasic_2016	M	FST	Supplementary Table 6: Marker genes for transcriptomic cell types.
Fst	Tasic_2018	M	FST	Figure 1c
Fut9	Ortiz	M	FUT9	Result:A reduced brain palette captures whole-brain organization-"the genes that best capture the global spatial signals"-266 genes
Fxyd6	Tasic_2016	M	FXYD6	Supplementary Table 6: Marker genes for transcriptomic cell types.
Fxyd6	Maynard	M&H	FXYD6	Supplementary Table 5: Using two lists of known layer-marker genes
Gaa	Ortiz	M	GAA	Result:A reduced brain palette captures whole-brain organization-"the genes that best capture the global spatial signals"-266 genes
Gabra5	Tasic_2016	M	GABRA5	Supplementary Table 6: Marker genes for transcriptomic cell types.
Gabra5	Maynard	M&H	GABRA5	Supplementary Table 5: Using two lists of known layer-marker genes
Gabrd	Tasic_2016	M	GABRD	Supplementary Table 6: Marker genes for transcriptomic cell types.
Gabrg1	Tasic_2016	M	GABRG1	Supplementary Table 6: Marker genes for transcriptomic cell types.
Gabrg1	Tasic_2018	M	GABRG1	Figure 1c
Gad1	Ortiz	M	GAD1	Result:A reduced brain palette captures whole-brain organization-"the genes that best capture the global spatial signals"-266 genes
Gad1	Tasic_2016	M	GAD1	Figure 1c-"major known marker genes"
Gad1	Hodge	H	GAD1	Figure 1; Figure 4; Figure 6; Extended Data Figure 1; Extended Data Figure 2; Extended Data Figure 4; Extended Data Figure 9; Extended Data Figure 10;
Gad2	Ortiz	M	GAD2	Result:A reduced brain palette captures whole-brain organization-"the genes that best capture the global spatial signals"-266 genes
Galntl6	Tasic_2016	M	GALNTL6	Supplementary Table 6: Marker genes for transcriptomic cell types.
Gap43	Tasic_2016	M	GAP43	Supplementary Table 6: Marker genes for transcriptomic cell types.
Gda	Ortiz	M	GDA	Result:A reduced brain palette captures whole-brain organization-"the genes that best capture the global spatial signals"-266 genes
Gfap	Tasic_2016	M	GFAP	Supplementary Table 6: Marker genes for transcriptomic cell types.
Gfap	Hodge	H	GFAP	Figure 1; Figure 5; Figure 6; Extended Data Figure 1; Extended Data Figure 2; Extended Data Figure 3;
Gfra2	Tasic_2016	M	GFRA2	Supplementary Table 6: Marker genes for transcriptomic cell types.
Ggh	Hodge	H	GGH	Figure 1; Figure 4; Figure 6; Extended Data Figure 1; Extended Data Figure 2; Extended Data Figure 3; Extended Data Figure 4; Extended Data Figure 9;
Gja1	Ortiz	M	GJA1	Result:A reduced brain palette captures whole-brain organization-"the genes that best capture the global spatial signals"-266 genes
Gja1	Tasic_2016	M	GJA1	Supplementary Table 6: Marker genes for transcriptomic cell types.
Gjb1	Tasic_2016	M	GJB1	Supplementary Table 6: Marker genes for transcriptomic cell types.
Gjb6	Tasic_2016	M	GJB6	Supplementary Table 6: Marker genes for transcriptomic cell types.
Gkn1	Tasic_2018	M	GKN1	Figure 1c
Glp1r	Hodge	H	GLP1R	Figure 1; Figure 4; Figure 6; Extended Data Figure 1; Extended Data Figure 2; Extended Data Figure 3; Extended Data Figure 4; Extended Data Figure 9;
Glp2r	Hodge	H	GLP2R	Figure 1; Figure 2; Figure 6; Figure 7; Extended Data Figure 1; Extended Data Figure 2; Extended Data Figure 3; Extended Data Figure 5; Extended Data Figure 8; Extended Data Figure 9;
Glra3	Tasic_2016	M	GLRA3	Supplementary Table 6: Marker genes for transcriptomic cell types.
Glra3	Maynard	M&H	GLRA3	INTRODUCTION,database
Glra3	Tasic_2018	M	GLRA3	Figure 1c
Glul	Ortiz	M	GLUL	Result:A reduced brain palette captures whole-brain organization-"the genes that best capture the global spatial signals"-266 genes
Gm15564	Ortiz	M	GM15564	Result:A reduced brain palette captures whole-brain organization-"the genes that best capture the global spatial signals"-266 genes
Gnb4	Ortiz	M	GNB4	Result:A reduced brain palette captures whole-brain organization-"the genes that best capture the global spatial signals"-266 genes
Gng13	Ortiz	M	GNG13	Result:A reduced brain palette captures whole-brain organization-"the genes that best capture the global spatial signals"-266 genes
Gng13	Tasic_2016	M	GNG13	Supplementary Table 6: Marker genes for transcriptomic cell types.
Gng2	Ortiz	M	GNG2	Result:A reduced brain palette captures whole-brain organization-"the genes that best capture the global spatial signals"-266 genes
Gng4	Ortiz	M	GNG4	Result:A reduced brain palette captures whole-brain organization-"the genes that best capture the global spatial signals"-266 genes
Gng7	Ortiz	M	GNG7	Result:A reduced brain palette captures whole-brain organization-"the genes that best capture the global spatial signals"-266 genes
Gpc3	Tasic_2018	M	GPC3	Figure 1c
Gpr126	Tasic_2016	M	GPR126	Supplementary Table 6: Marker genes for transcriptomic cell types.
Gpr139	Tasic_2018	M	GPR139	Figure 1c; Figure 4c-Marker gene expression distributions within each cluster are represented by violin plots
Gpr149	Tasic_2018	M	GPR149	Figure 1c
Gpr151	Tasic_2016	M	GPR151	Supplementary Table 6: Marker genes for transcriptomic cell types.
Gpr17	Tasic_2016	M	GPR17	Supplementary Table 6: Marker genes for transcriptomic cell types.
Gpr34	Tasic_2016	M	GPR34	Supplementary Table 6: Marker genes for transcriptomic cell types.
Gpr37	Tasic_2016	M	GPR37	Supplementary Table 6: Marker genes for transcriptomic cell types.
Gpr37l1	Ortiz	M	GPR37L1	Result:A reduced brain palette captures whole-brain organization-"the genes that best capture the global spatial signals"-266 genes
Gpr50	Tasic_2018	M	GPR50	Figure 1c
gpr6	Maynard	M&H	GPR6	Supplementary Table 5: Using two lists of known layer-marker genes
Gpr88	Ortiz	M	GPR88	ST at the whole-brain scale; Figure 1; Figure 3;
Gpr88	Tasic_2016	M	GPR88	Supplementary Table 6: Marker genes for transcriptomic cell types.
Gpr88	Tasic_2018	M	GPR88	Figure 1c
Gprasp2	Ortiz	M	GPRASP2	Result:A reduced brain palette captures whole-brain organization-"the genes that best capture the global spatial signals"-266 genes
Gprc5c	Tasic_2016	M	GPRC5C	Supplementary Table 6: Marker genes for transcriptomic cell types.
Gpx1	Ortiz	M	GPX1	Result:A reduced brain palette captures whole-brain organization-"the genes that best capture the global spatial signals"-266 genes
Gpx3	Tasic_2016	M	GPX3	Supplementary Table 6: Marker genes for transcriptomic cell types.
Gria1	Ortiz	M	GRIA1	Result:A reduced brain palette captures whole-brain organization-"the genes that best capture the global spatial signals"-266 genes
Gria3	Tasic_2016	M	GRIA3	Supplementary Table 6: Marker genes for transcriptomic cell types.
Gria4	Ortiz	M	GRIA4	Result:A reduced brain palette captures whole-brain organization-"the genes that best capture the global spatial signals"-266 genes
Grik1	Tasic_2016	M	GRIK1	Supplementary Table 6: Marker genes for transcriptomic cell types.
Grik4	Maynard	H	GRIK4	Supplementary Table 5: Using two lists of known layer-marker genes
Grin2a	Ortiz	M	GRIN2A	Result:A reduced brain palette captures whole-brain organization-"the genes that best capture the global spatial signals"-266 genes
Grm3	Tasic_2016	M	GRM3	Supplementary Table 6: Marker genes for transcriptomic cell types.
Grm5	Tasic_2018	M	GRM5	Figure 1c
Gsg1L	Maynard	M&H	GSG1L	Supplementary Table 5: Using two lists of known layer-marker genes
Gstp1	Ortiz	M	GSTP1	Result:A reduced brain palette captures whole-brain organization-"the genes that best capture the global spatial signals"-266 genes
Gxylt2	Hodge	H	GXYLT2	Figure 1; Figure 4; Figure 6; Extended Data Figure 1; Extended Data Figure 2; Extended Data Figure 3; Extended Data Figure 4; Extended Data Figure 9;
H3f3b	Ortiz	M	H3F3B	Result:A reduced brain palette captures whole-brain organization-"the genes that best capture the global spatial signals"-266 genes
Hap1	Ortiz	M	HAP1	Result:A reduced brain palette captures whole-brain organization-"the genes that best capture the global spatial signals"-266 genes
Has2	Tasic_2016	M	HAS2	Supplementary Table 6: Marker genes for transcriptomic cell types.
Hcn1	Tasic_2016	M	HCN1	Supplementary Table 6: Marker genes for transcriptomic cell types.
Hcrtr1	Tasic_2016	M	HCRTR1	Supplementary Table 6: Marker genes for transcriptomic cell types.
Hepacam	Tasic_2016	M	HEPACAM	Supplementary Table 6: Marker genes for transcriptomic cell types.
Hexb	Ortiz	M	HEXB	Result:A reduced brain palette captures whole-brain organization-"the genes that best capture the global spatial signals"-266 genes
Hhatl	Tasic_2016	M	HHATL	Supplementary Table 6: Marker genes for transcriptomic cell types.
Higd1b	Tasic_2016	M	HIGD1B	Supplementary Table 6: Marker genes for transcriptomic cell types.
Hk2	Tasic_2016	M	HK2	Supplementary Table 6: Marker genes for transcriptomic cell types.
Hlf	Ortiz	M	HLF	Result:A reduced brain palette captures whole-brain organization-"the genes that best capture the global spatial signals"-266 genes
Hmcn1	Tasic_2018	M	HMCN1	Figure 1c
Hmgcs2	Tasic_2016	M	HMGCS2	Supplementary Table 6: Marker genes for transcriptomic cell types.
Hopx	Ortiz	M	HOPX	Result:A reduced brain palette captures whole-brain organization-"the genes that best capture the global spatial signals"-266 genes
Hpca	Ortiz	M	HPCA	Result:A reduced brain palette captures whole-brain organization-"the genes that best capture the global spatial signals"-266 genes
Hpcal1	Maynard	H	HPCAL1	Figure 4:Discovery and smFISH validation of new layer-enriched genes
Hpcal4	Ortiz	M	HPCAL4	Result:A reduced brain palette captures whole-brain organization-"the genes that best capture the global spatial signals"-266 genes
Hpgd	Hodge	H	HPGD	Figure 1; Figure 4; Figure 6; Extended Data Figure 1; Extended Data Figure 2; Extended Data Figure 3; Extended Data Figure 4; Extended Data Figure 9;
Hpgd	Tasic_2018	M	HPGD	Figure 1c
Hpse	Tasic_2018	M	HPSE	Figure 1c
Hs3st3a1	Hodge	H	HS3ST3A1	Figure 1; Figure 4; Figure 6; Extended Data Figure 1; Extended Data Figure 2; Extended Data Figure 3; Extended Data Figure 4;
Hs3st4	Ortiz	M	HS3ST4	Result:A reduced brain palette captures whole-brain organization-"the genes that best capture the global spatial signals"-266 genes
Hs3st4	Tasic_2016	M	HS3ST4	Supplementary Table 6: Marker genes for transcriptomic cell types.
Hs3st6	Tasic_2018	M	HS3ST6	Figure 1c
Hsd11b1	Tasic_2016	M	HSD11B1	Supplementary Table 6: Marker genes for transcriptomic cell types.
Hsd11b1	Tasic_2018	M	HSD11B1	Figure 1c; Figure 4c-Marker gene expression distributions within each cluster are represented by violin plots
Hsd17b2	Tasic_2018	M	HSD17B2	Figure 1c
Hspb3	Tasic_2016	M	HSPB3	Supplementary Table 6: Marker genes for transcriptomic cell types.
Htr1d	Tasic_2016	M	HTR1D	Supplementary Table 6: Marker genes for transcriptomic cell types.
Htr1d	Tasic_2018	M	HTR1D	Figure 1c
Htr1f	Tasic_2018	M	HTR1F	Figure 1c
Htr2a	Tasic_2016	M	HTR2A	Supplementary Table 6: Marker genes for transcriptomic cell types.
Htr2c	Maynard	H	HTR2C	Supplementary Table 5: Using two lists of known layer-marker genes
Htr2c	Tasic_2018	M	HTR2C	Figure 1c
Htr7	Tasic_2016	M	HTR7	Supplementary Table 6: Marker genes for transcriptomic cell types.
Id1	Tasic_2016	M	ID1	Supplementary Table 6: Marker genes for transcriptomic cell types.
Id2	Ortiz	M	ID2	Result:A reduced brain palette captures whole-brain organization-"the genes that best capture the global spatial signals"-266 genes
Id2	Maynard	M&H	ID2	Supplementary Table 5: Using two lists of known layer-marker genes
Ier5	Ortiz	M	IER5	Result:A reduced brain palette captures whole-brain organization-"the genes that best capture the global spatial signals"-266 genes
Ier5	Tasic_2016	M	IER5	Supplementary Table 6: Marker genes for transcriptomic cell types.
Ifitm2	Tasic_2016	M	IFITM2	Supplementary Table 6: Marker genes for transcriptomic cell types.
Ifitm3	Tasic_2016	M	IFITM3	Supplementary Table 6: Marker genes for transcriptomic cell types.
Igf2	Ortiz	M	IGF2	Result:A reduced brain palette captures whole-brain organization-"the genes that best capture the global spatial signals"-266 genes
Igfbp2	Ortiz	M	IGFBP2	Result:A reduced brain palette captures whole-brain organization-"the genes that best capture the global spatial signals"-266 genes
Igfbp2	Tasic_2016	M	IGFBP2	Supplementary Table 6: Marker genes for transcriptomic cell types.
Igfbp4	Maynard	M&H	IGFBP4	Supplementary Table 5: Using two lists of known layer-marker genes
Igfbp5	Ortiz	M	IGFBP5	Result:A reduced brain palette captures whole-brain organization-"the genes that best capture the global spatial signals"-266 genes
Igfbp6	Tasic_2018	M	IGFBP6	Figure 1c
Igsf11	Maynard	M&H	IGSF11	Supplementary Table 5: Using two lists of known layer-marker genes
Igsf3	Tasic_2016	M	IGSF3	Supplementary Table 6: Marker genes for transcriptomic cell types.
Il15	Hodge	H	IL15	Figure 1; Figure 2; Figure 6; Figure 7; Extended Data Figure 2; Extended Data Figure 3; Extended Data Figure 5; Extended Data Figure 9;
Il1rapl2	Tasic_2016	M	IL1RAPL2	Supplementary Table 6: Marker genes for transcriptomic cell types.
Il33	Ortiz	M	IL33	Result:A reduced brain palette captures whole-brain organization-"the genes that best capture the global spatial signals"-266 genes
Impact	Ortiz	M	IMPACT	Result:A reduced brain palette captures whole-brain organization-"the genes that best capture the global spatial signals"-266 genes
Inhba	Tasic_2016	M	INHBA	Supplementary Table 6: Marker genes for transcriptomic cell types.
Inpp4b	Tasic_2016	M	INPP4B	Supplementary Table 6: Marker genes for transcriptomic cell types.
Inpp4b	Maynard	M&H	INPP4B	Supplementary Table 5: Using two lists of known layer-marker genes
Inpp5d	Tasic_2016	M	INPP5D	Supplementary Table 6: Marker genes for transcriptomic cell types.
Insl6	Tasic_2016	M	INSL6	Supplementary Table 6: Marker genes for transcriptomic cell types.
Islr	Tasic_2018	M	ISLR	Figure 1c
Itga4	Tasic_2018	M	ITGA4	Figure 1c
Itga7	Tasic_2016	M	ITGA7	Supplementary Table 6: Marker genes for transcriptomic cell types.
Itgam	Tasic_2016	M	ITGAM	Figure 1c-"major known marker genes"; Supplementary Table 6: Marker genes for transcriptomic cell types.
Itih5	Tasic_2016	M	ITIH5	Supplementary Table 6: Marker genes for transcriptomic cell types.
Itih5	Tasic_2018	M	ITIH5	Figure 1c
Itm2a	Tasic_2018	M	ITM2A	Figure 1c
Itpr1	Ortiz	M	ITPR1	Result:A reduced brain palette captures whole-brain organization-"the genes that best capture the global spatial signals"-266 genes
Junb	Ortiz	M	JUNB	Result:A reduced brain palette captures whole-brain organization-"the genes that best capture the global spatial signals"-266 genes
Kalrn	Ortiz	M	KALRN	Result:A reduced brain palette captures whole-brain organization-"the genes that best capture the global spatial signals"-266 genes
Kank4	Tasic_2018	M	KANK4	Figure 1c
Kcna1	Maynard	H	KCNA1	Supplementary Table 5: Using two lists of known layer-marker genes
Kcnab1	Ortiz	M	KCNAB1	Result:A reduced brain palette captures whole-brain organization-"the genes that best capture the global spatial signals"-266 genes
Kcnab1	Tasic_2016	M	KCNAB1	Supplementary Table 6: Marker genes for transcriptomic cell types.
Kcnc1	Ortiz	M	KCNC1	Result:A reduced brain palette captures whole-brain organization-"the genes that best capture the global spatial signals"-266 genes
Kcnc2	Ortiz	M	KCNC2	Result:A reduced brain palette captures whole-brain organization-"the genes that best capture the global spatial signals"-266 genes
Kcnd2	Tasic_2016	M	KCND2	Supplementary Table 6: Marker genes for transcriptomic cell types.
Kcne4	Tasic_2018	M	KCNE4	Figure 1c
Kcnh4	Maynard	H	KCNH4	Supplementary Table 5: Using two lists of known layer-marker genes
Kcnip1	Maynard	H	KCNIP1	Supplementary Table 5: Using two lists of known layer-marker genes
Kcnip2	Maynard	M&H	KCNIP2	Supplementary Table 5: Using two lists of known layer-marker genes
Kcnj10	Ortiz	M	KCNJ10	Result:A reduced brain palette captures whole-brain organization-"the genes that best capture the global spatial signals"-266 genes
Kcnj8	Tasic_2018	M	KCNJ8	Figure 1c
Kcnk2	Maynard	M&H	KCNK2	Supplementary Table 5: Using two lists of known layer-marker genes
Kcns3	Tasic_2016	M	KCNS3	Supplementary Table 6: Marker genes for transcriptomic cell types.
Kctd13	Tasic_2016	M	KCTD13	Supplementary Table 6: Marker genes for transcriptomic cell types.
Kctd8	Tasic_2016	M	KCTD8	Supplementary Table 6: Marker genes for transcriptomic cell types.
Kif19a	Tasic_2016	M	KIF19	Supplementary Table 6: Marker genes for transcriptomic cell types.
Kirrel3	Tasic_2016	M	KIRREL3	Supplementary Table 6: Marker genes for transcriptomic cell types.
Kit	Tasic_2016	M	KIT	Supplementary Table 6: Marker genes for transcriptomic cell types.
Kitl	Tasic_2016	M	KITLG	Supplementary Table 6: Marker genes for transcriptomic cell types.
kitlg	Maynard	M&H	KITLG	Supplementary Table 5: Using two lists of known layer-marker genes
Kl	Ortiz	M	KL	Result:A reduced brain palette captures whole-brain organization-"the genes that best capture the global spatial signals"-266 genes
Klf10	Tasic_2016	M	KLF10	Supplementary Table 6: Marker genes for transcriptomic cell types.
Klhdc8a	Hodge	H	KLHDC8A	Figure 1; Figure 4; Figure 6; Extended Data Figure 1; Extended Data Figure 2; Extended Data Figure 3; Extended Data Figure 4; Extended Data Figure 9;
Klhl14	Tasic_2016	M	KLHL14	Supplementary Table 6: Marker genes for transcriptomic cell types.
Klk8	Tasic_2016	M	KLK8	Supplementary Table 6: Marker genes for transcriptomic cell types.
Krt12	Tasic_2016	M	KRT12	Supplementary Table 6: Marker genes for transcriptomic cell types.
Krt17	Maynard	H	KRT17	Figure 4:Discovery and smFISH validation of new layer-enriched genes
Krt18	Tasic_2016	M	KRT18	Supplementary Table 6: Marker genes for transcriptomic cell types.
Krt73	Tasic_2016	M	KRT73	Supplementary Table 6: Marker genes for transcriptomic cell types.
Krt73	Tasic_2018	M	KRT73	Figure 1c
Krt80	Tasic_2018	M	KRT80	Figure 1c
Lamp5	Ortiz	M	LAMP5	Result:A reduced brain palette captures whole-brain organization-"the genes that best capture the global spatial signals"-266 genes
Lamp5	Tasic_2016	M	LAMP5	Supplementary Table 6: Marker genes for transcriptomic cell types.
Lamp5	Maynard	M&H	LAMP5	Figure 6; Figure 7;
Lamp5	Hodge	H	LAMP5	Figure 1; Figure 2; Figure 3; Figure 4; Figure 6; Figure 7; Figure 8; Extended Data Figure 1; Extended Data Figure 2; Extended Data Figure 3; Extended Data Figure 5; Extended Data Figure 7; Extended Data Figure 8; Extended Data Figure 9;
Lamp5	Tasic_2018	M	LAMP5	Figure 1c
Lbh	Hodge	H	LBH	Figure 1; Figure 4; Figure 6; Extended Data Figure 1; Extended Data Figure 2; Extended Data Figure 3; Extended Data Figure 4; Extended Data Figure 9;
Lcp2	Hodge	H	LCP2	Figure 1; Figure 4; Figure 6; Extended Data Figure 1; Extended Data Figure 2; Extended Data Figure 3; Extended Data Figure 4;
Ldb2	Maynard	M&H	LDB2	Supplementary Table 5: Using two lists of known layer-marker genes
Lemd2	Tasic_2016	M	LEMD2	Supplementary Table 6: Marker genes for transcriptomic cell types.
Lgals1	Maynard	H	LGALS1	Supplementary Table 5: Using two lists of known layer-marker genes
Lgr5	Hodge	H	LGR5	Figure 1; Figure 4; Figure 6; Extended Data Figure 1; Extended Data Figure 2; Extended Data Figure 3; Extended Data Figure 9;
Lgr5	Tasic_2018	M	LGR5	Figure 1c
lhx2	Maynard	M&H	LHX2	Supplementary Table 5: Using two lists of known layer-marker genes
Lhx5	Tasic_2018	M	LHX5	Overall cell type taxonomy-"CR–Lhx5 corresponds to Cajal–Retzius (CR) cells based on their location in L1 and expression of known Cajal–Retzius mark ers, such as Trp73, Lhx5 and Reln"
Lhx6	Tasic_2016	M	LHX6	Supplementary Table 6: Marker genes for transcriptomic cell types.
Lhx6	Hodge	H	LHX6	Figure 1; Figure 4; Extended Data Figure 9; Extended Data Figure 10;
Lhx6	Tasic_2018	M	LHX6	Figure 1c
Lipg	Tasic_2016	M	LIPG	Supplementary Table 6: Marker genes for transcriptomic cell types.
Lix1	Maynard	M&H	LIX1	Supplementary Table 5: Using two lists of known layer-marker genes
Lman1l	Tasic_2016	M	LMAN1L	Supplementary Table 6: Marker genes for transcriptomic cell types.
Lmo1	Tasic_2018	M	LMO1	Figure 1c
Lmo3	Ortiz	M	LMO3	Result:A reduced brain palette captures whole-brain organization-"the genes that best capture the global spatial signals"-266 genes
Lmo3	Maynard	M&H	LMO3	Supplementary Table 5: Using two lists of known layer-marker genes
Lmo4	Ortiz	M	LMO4	Result:A reduced brain palette captures whole-brain organization-"the genes that best capture the global spatial signals"-266 genes
Lmo4	Maynard	M&H	LMO4	Supplementary Table 5: Using two lists of known layer-marker genes
Lratd2	Tasic_2018	M	LRATD2	Figure 4c-Marker gene expression distributions within each cluster are represented by violin plots
Lrg1	Tasic_2018	M	LRG1	Figure 1c
Lrrc4c	Tasic_2016	M	LRRC4C	Supplementary Table 6: Marker genes for transcriptomic cell types.
Lrrc61	Tasic_2016	M	LRRC61	Supplementary Table 6: Marker genes for transcriptomic cell types.
Lrrtm4	Tasic_2016	M	LRRTM4	Supplementary Table 6: Marker genes for transcriptomic cell types.
Lsp1	Tasic_2018	M	LSP1	Figure 1c
Ltk	Hodge	H	LTK	Figure 1; Figure 2; Figure 3; Figure 4; Figure 6; Figure 7; Extended Data Figure 1; Extended Data Figure 2; Extended Data Figure 3; Extended Data Figure 5; Extended Data Figure 8; Extended Data Figure 9;
Lxn	Ortiz	M	LXN	Result:A reduced brain palette captures whole-brain organization-"the genes that best capture the global spatial signals"-266 genes
Lxn	Maynard	M&H	LXN	Supplementary Table 5: Using two lists of known layer-marker genes
Ly6d	Tasic_2016	M	LY6D	Supplementary Table 6: Marker genes for transcriptomic cell types.
Ly6h	Ortiz	M	LY6H	Result:A reduced brain palette captures whole-brain organization-"the genes that best capture the global spatial signals"-266 genes
Ly86	Tasic_2016	M	LY86	Supplementary Table 6: Marker genes for transcriptomic cell types.
Lypd1	Ortiz	M	LYPD1	Result:A reduced brain palette captures whole-brain organization-"the genes that best capture the global spatial signals"-266 genes
Lypd1	Tasic_2018	M	LYPD1	Figure 1c
Mab21l1	Tasic_2016	M	MAB21L1	Supplementary Table 6: Marker genes for transcriptomic cell types.
Mab21l1	Tasic_2018	M	MAB21L1	Figure 1c
Macc1	Tasic_2018	M	MACC1	Figure 1c
Macf1	Ortiz	M	MACF1	Result:A reduced brain palette captures whole-brain organization-"the genes that best capture the global spatial signals"-266 genes
Mag	Ortiz	M	MAG	Result:A reduced brain palette captures whole-brain organization-"the genes that best capture the global spatial signals"-266 genes
Mal	Ortiz	M	MAL	Result:A reduced brain palette captures whole-brain organization-"the genes that best capture the global spatial signals"-266 genes
Man1a	Tasic_2016	M	MAN1A1	Supplementary Table 6: Marker genes for transcriptomic cell types.
Mapk13	Tasic_2016	M	MAPK13	Supplementary Table 6: Marker genes for transcriptomic cell types.
MarcksL1	Maynard	M&H	MARCKSL1	Supplementary Table 5: Using two lists of known layer-marker genes
Matn2	Tasic_2016	M	MATN2	Supplementary Table 6: Marker genes for transcriptomic cell types.
Mbnl3	Tasic_2016	M	MBNL3	Supplementary Table 6: Marker genes for transcriptomic cell types.
Mbp	Ortiz	M	MBP	Result:A reduced brain palette captures whole-brain organization-"the genes that best capture the global spatial signals"-266 genes
Mbp	Tasic_2016	M	MBP	Supplementary Table 6: Marker genes for transcriptomic cell types.
Mc4r	Tasic_2016	M	MC4R	Supplementary Table 6: Marker genes for transcriptomic cell types.
Mc4r	Hodge	H	MC4R	Figure 1; Figure 4; Figure 6; Extended Data Figure 1; Extended Data Figure 2; Extended Data Figure 3; Extended Data Figure 4; Extended Data Figure 9;
Mc5r	Tasic_2018	M	MC5R	Figure 1c
Mdga1	Maynard	M&H	MDGA1	Supplementary Table 5: Using two lists of known layer-marker genes
Mef2c	Ortiz	M	MEF2C	Result:A reduced brain palette captures whole-brain organization-"the genes that best capture the global spatial signals"-266 genes
mef2c	Maynard	M&H	MEF2C	Supplementary Table 5: Using two lists of known layer-marker genes
Megf10	Tasic_2016	M	MEGF10	Supplementary Table 6: Marker genes for transcriptomic cell types.
Meis2	Ortiz	M	MEIS2	Result:A reduced brain palette captures whole-brain organization-"the genes that best capture the global spatial signals"-266 genes
Meis2	Tasic_2018	M	MEIS2	Figure 1c
Mepe	Hodge	H	MEPE	Figure 1; Figure 4; Figure 6; Extended Data Figure 1; Extended Data Figure 2; Extended Data Figure 3; Extended Data Figure 4; Extended Data Figure 9;
Met	Tasic_2018	M	MET	Figure 1c
Mfge8	Maynard	H	MFGE8	Supplementary Table 5: Using two lists of known layer-marker genes
Mgp	Ortiz	M	MGP	Result:A reduced brain palette captures whole-brain organization-"the genes that best capture the global spatial signals"-266 genes
Mlc1	Tasic_2016	M	MLC1	Supplementary Table 6: Marker genes for transcriptomic cell types.
Mme	Tasic_2018	M	MME	Figure 1c
Mndal	Tasic_2016	M	MNDAL	Supplementary Table 6: Marker genes for transcriptomic cell types.
Mobp	Ortiz	M	MOBP	Result:A reduced brain palette captures whole-brain organization-"the genes that best capture the global spatial signals"-266 genes
Mobp	Tasic_2016	M	MOBP	Supplementary Table 6: Marker genes for transcriptomic cell types.
Mobp	Maynard	H	MOBP	Figure 1cd; Result-"The orientation of each sample was confirmed by delineating the border between layer 6 (L6) and the adjacent white matter (WM) and identifying layer L5, using marker genes for gray matter/neurons (SNAP25), WM/oligodendrocytes (MOBP) and L5 (PCP4) in each tissue section"
Mog	Ortiz	M	MOG	Result:A reduced brain palette captures whole-brain organization-"the genes that best capture the global spatial signals"-266 genes
Mog	Tasic_2016	M	MOG	Figure 1c-"major known marker genes"; Supplementary Table 6: Marker genes for transcriptomic cell types.
Moxd1	Tasic_2016	M	MOXD1	Supplementary Table 6: Marker genes for transcriptomic cell types.
Mpeg1	Tasic_2016	M	MPEG1	Supplementary Table 6: Marker genes for transcriptomic cell types.
Mpped1	Tasic_2016	M	MPPED1	Supplementary Table 6: Marker genes for transcriptomic cell types.
Mrc1	Tasic_2018	M	MRC1	Figure 1c
Msx1	Ortiz	M	MSX1	Result:A reduced brain palette captures whole-brain organization-"the genes that best capture the global spatial signals"-266 genes
Mt1	Ortiz	M	MT1	Result:A reduced brain palette captures whole-brain organization-"the genes that best capture the global spatial signals"-266 genes
Mt2	Ortiz	M	MT2	Result:A reduced brain palette captures whole-brain organization-"the genes that best capture the global spatial signals"-266 genes
Mup5	Tasic_2018	M	MUP5	Figure 1c
Mybpc1	Tasic_2016	M	MYBPC1	Supplementary Table 6: Marker genes for transcriptomic cell types.
Myh1	Tasic_2016	M	MYH1	Supplementary Table 6: Marker genes for transcriptomic cell types.
Myh13	Tasic_2016	M	MYH13	Supplementary Table 6: Marker genes for transcriptomic cell types.
Myh4	Tasic_2016	M	MYH4	Supplementary Table 6: Marker genes for transcriptomic cell types.
Myh4	Tasic_2018	M	MYH4	Figure 1c
Myh8	Tasic_2016	M	MYH8	Supplementary Table 6: Marker genes for transcriptomic cell types.
Myh8	Tasic_2018	M	MYH8	Figure 1c
Myl1	Tasic_2018	M	MYL1	Figure 1c
Myl4	Tasic_2016	M	MYL4	Supplementary Table 6: Marker genes for transcriptomic cell types.
Mylk	Tasic_2016	M	MYLK	Supplementary Table 6: Marker genes for transcriptomic cell types.
Myo5b	Tasic_2016	M	MYO5B	Supplementary Table 6: Marker genes for transcriptomic cell types.
Myoc	Ortiz	M	MYOC	Result:A reduced brain palette captures whole-brain organization-"the genes that best capture the global spatial signals"-266 genes
Naalad2	Hodge	H	NAALAD2	Figure 1; Figure 2; Figure 6; Figure 7; Extended Data Figure 1; Extended Data Figure 2; Extended Data Figure 3; Extended Data Figure 5; Extended Data Figure 9;
Nacc2	Tasic_2016	M	NACC2	Supplementary Table 6: Marker genes for transcriptomic cell types.
Nap1l5	Ortiz	M	NAP1L5	Result:A reduced brain palette captures whole-brain organization-"the genes that best capture the global spatial signals"-266 genes
Nat8l	Ortiz	M	NAT8L	Result:A reduced brain palette captures whole-brain organization-"the genes that best capture the global spatial signals"-266 genes
Nckap1l	Tasic_2016	M	NCKAP1L	Supplementary Table 6: Marker genes for transcriptomic cell types.
Ndn	Ortiz	M	NDN	Result:A reduced brain palette captures whole-brain organization-"the genes that best capture the global spatial signals"-266 genes
Ndnf	Maynard	M&H	NDNF	Figure 5; Figure 6;
Ndrg1	Ortiz	M	NDRG1	Result:A reduced brain palette captures whole-brain organization-"the genes that best capture the global spatial signals"-266 genes
Ndrg1	Tasic_2016	M	NDRG1	Supplementary Table 6: Marker genes for transcriptomic cell types.
Ndst4	Tasic_2016	M	NDST4	Supplementary Table 6: Marker genes for transcriptomic cell types.
Necab1	Ortiz	M	NECAB1	Result:A reduced brain palette captures whole-brain organization-"the genes that best capture the global spatial signals"-266 genes
Necab1	Tasic_2018	M	NECAB1	Figure 1c
Necab2	Ortiz	M	NECAB2	Result:A reduced brain palette captures whole-brain organization-"the genes that best capture the global spatial signals"-266 genes
Nefh	Ortiz	M	NEFH	Result:A reduced brain palette captures whole-brain organization-"the genes that best capture the global spatial signals"-266 genes
Nefh	Maynard	M&H	NEFH	Supplementary Table 5: Using two lists of known layer-marker genes
Nefl	Ortiz	M	NEFL	Result:A reduced brain palette captures whole-brain organization-"the genes that best capture the global spatial signals"-266 genes
Nefl	Tasic_2018	M	NEFL	Figure 1c
Nefm	Ortiz	M	NEFM	Result:A reduced brain palette captures whole-brain organization-"the genes that best capture the global spatial signals"-266 genes
Nell1	Tasic_2016	M	NELL1	Supplementary Table 6: Marker genes for transcriptomic cell types.
Neurod1	Ortiz	M	NEUROD1	Result:A reduced brain palette captures whole-brain organization-"the genes that best capture the global spatial signals"-266 genes
Neurod6	Ortiz	M	NEUROD6	Result:A reduced brain palette captures whole-brain organization-"the genes that best capture the global spatial signals"-266 genes
Nfib	Ortiz	M	NFIB	Result:A reduced brain palette captures whole-brain organization-"the genes that best capture the global spatial signals"-266 genes
Nfib	Tasic_2016	M	NFIB	Supplementary Table 6: Marker genes for transcriptomic cell types.
Ngb	Tasic_2016	M	NGB	Supplementary Table 6: Marker genes for transcriptomic cell types.
Ngf	Tasic_2016	M	NGF	Supplementary Table 6: Marker genes for transcriptomic cell types.
Nid1	Tasic_2016	M	NID1	Supplementary Table 6: Marker genes for transcriptomic cell types.
Nmbr	Tasic_2016	M	NMBR	Supplementary Table 6: Marker genes for transcriptomic cell types.
Nmbr	Hodge	H	NMBR	Figure 4; Figure 6; Extended Data Figure 1; Extended Data Figure 2; Extended Data Figure 3; Extended Data Figure 4; Extended Data Figure 9;
Nnat	Ortiz	M	NNAT	Result:A reduced brain palette captures whole-brain organization-"the genes that best capture the global spatial signals"-266 genes
Nnat	Tasic_2016	M	NNAT	Supplementary Table 6: Marker genes for transcriptomic cell types.
Nos1	Tasic_2016	M	NOS1	Supplementary Table 6: Marker genes for transcriptomic cell types.
Nostrin	Tasic_2016	M	NOSTRIN	Supplementary Table 6: Marker genes for transcriptomic cell types.
Nostrin	Hodge	H	NOSTRIN	Figure 1; Figure 5; Extended Data Figure 1; Extended Data Figure 2; Extended Data Figure 3;
Npas3	Tasic_2016	M	NPAS3	Supplementary Table 6: Marker genes for transcriptomic cell types.
Npm1	Hodge	H	NPM1	Figure 1; Figure 4; Figure 6; Extended Data Figure 1; Extended Data Figure 2; Extended Data Figure 3; Extended Data Figure 4; Extended Data Figure 9;
Npsr1	Tasic_2018	M	NPSR1	Figure 1c
Nptx1	Ortiz	M	NPTX1	Result:A reduced brain palette captures whole-brain organization-"the genes that best capture the global spatial signals"-266 genes
Nptx1	Tasic_2016	M	NPTX1	Supplementary Table 6: Marker genes for transcriptomic cell types.
Nptx2	Tasic_2018	M	NPTX2	Figure 1c
Nptxr	Ortiz	M	NPTXR	Result:A reduced brain palette captures whole-brain organization-"the genes that best capture the global spatial signals"-266 genes
Npw	Tasic_2018	M	NPW	Figure 1c
Npy	Tasic_2016	M	NPY	Supplementary Table 6: Marker genes for transcriptomic cell types.
Npy	Hodge	H	NPY	Figure 1; Figure 4; Figure 6; Extended Data Figure 2; Extended Data Figure 3; Extended Data Figure 4; Extended Data Figure 9;
Npy2r	Tasic_2016	M	NPY2R	Supplementary Table 6: Marker genes for transcriptomic cell types.
Npy2r	Maynard	H	NPY2R	Supplementary Table 5: Using two lists of known layer-marker genes
Npy2r	Tasic_2018	M	NPY2R	Figure 1c
Nr2f2	Tasic_2016	M	NR2F2	Supplementary Table 6: Marker genes for transcriptomic cell types.
Nr2f2	Tasic_2018	M	NR2F2	Figure 1c
Nr4a1	Ortiz	M	NR4A1	Result:A reduced brain palette captures whole-brain organization-"the genes that best capture the global spatial signals"-266 genes
Nr4a2	Ortiz	M	NR4A2	Result:A reduced brain palette captures whole-brain organization-"the genes that best capture the global spatial signals"-266 genes
Nr4a2	Tasic_2016	M	NR4A2	Supplementary Table 6: Marker genes for transcriptomic cell types.
Nr4a2	Maynard	M&H	NR4A2	Supplementary Table 5: Using two lists of known layer-marker genes
Nr4a3	Maynard	M&H	NR4A3	Supplementary Table 5: Using two lists of known layer-marker genes
Nrep	Ortiz	M	NREP	Result:A reduced brain palette captures whole-brain organization-"the genes that best capture the global spatial signals"-266 genes
Nrn1	Ortiz	M	NRN1	Result:A reduced brain palette captures whole-brain organization-"the genes that best capture the global spatial signals"-266 genes
Nrp1	Tasic_2016	M	NRP1	Supplementary Table 6: Marker genes for transcriptomic cell types.
Nrsn1	Ortiz	M	NRSN1	Result:A reduced brain palette captures whole-brain organization-"the genes that best capture the global spatial signals"-266 genes
Nsmf	Ortiz	M	NSMF	Result:A reduced brain palette captures whole-brain organization-"the genes that best capture the global spatial signals"-266 genes
Nt5e	Tasic_2016	M	NT5E	Supplementary Table 6: Marker genes for transcriptomic cell types.
Ntf3	Tasic_2016	M	NTF3	Supplementary Table 6: Marker genes for transcriptomic cell types.
Ntf3	Tasic_2018	M	NTF3	Figure 1c
Ntn1	Tasic_2018	M	NTN1	Figure 1c
Ntng1	Ortiz	M	NTNG1	Result:A reduced brain palette captures whole-brain organization-"the genes that best capture the global spatial signals"-266 genes
Ntng2	Maynard	M&H	NTNG2	Supplementary Table 5: Using two lists of known layer-marker genes
Ntrk3	Tasic_2016	M	NTRK3	Supplementary Table 6: Marker genes for transcriptomic cell types.
Nts	Tasic_2016	M	NTS	Supplementary Table 6: Marker genes for transcriptomic cell types.
Nts	Tasic_2018	M	NTS	Figure 1c
Ntsr2	Tasic_2016	M	NTSR2	Supplementary Table 6: Marker genes for transcriptomic cell types.
Nupr1	Tasic_2016	M	NUPR1	Supplementary Table 6: Marker genes for transcriptomic cell types.
Nwd2	Ortiz	M	NWD2	Result:A reduced brain palette captures whole-brain organization-"the genes that best capture the global spatial signals"-266 genes
Nxph1	Tasic_2018	M	NXPH1	Figure 1c
Nxph2	Tasic_2018	M	NXPH2	Figure 1c
Nxph4	Tasic_2016	M	NXPH4	Supplementary Table 6: Marker genes for transcriptomic cell types.
Olfm1	Ortiz	M	OLFM1	Result:A reduced brain palette captures whole-brain organization-"the genes that best capture the global spatial signals"-266 genes
Olfm3	Tasic_2016	M	OLFM3	Supplementary Table 6: Marker genes for transcriptomic cell types.
Olfr111	Tasic_2018	M	OLFR111	Figure 1c
Oma1	Maynard	M&H	OMA1	Supplementary Table 5: Using two lists of known layer-marker genes
Opalin	Hodge	H	OPALIN	Figure 1; Figure 5; Figure 6; Extended Data Figure 1; Extended Data Figure 2; Extended Data Figure 3;
Opn3	Maynard	M&H	OPN3	Supplementary Table 5: Using two lists of known layer-marker genes
Oprk1	Maynard	H	OPRK1	Supplementary Table 5: Using two lists of known layer-marker genes
Oprk1	Tasic_2018	M	OPRK1	Figure 1c; Figure 4c-Marker gene expression distributions within each cluster are represented by violin plots
Oprm1	Hodge	H	OPRM1	Figure 1; Figure 4; Figure 6; Extended Data Figure 1; Extended Data Figure 2; Extended Data Figure 3; Extended Data Figure 4;
Osr1	Tasic_2018	M	OSR1	Figure 1c; Figure 4c-Marker gene expression distributions within each cluster are represented by violin plots
Otof	Tasic_2016	M	OTOF	Supplementary Table 6: Marker genes for transcriptomic cell types.
Otx1	Maynard	M&H	OTX1	Supplementary Table 5: Using two lists of known layer-marker genes
Oxr1	Ortiz	M	OXR1	Result:A reduced brain palette captures whole-brain organization-"the genes that best capture the global spatial signals"-266 genes
Oxtr	Tasic_2018	M	OXTR	Figure 1c
P2ry12	Tasic_2018	M	P2RY12	Figure 1c
P2ry13	Tasic_2016	M	P2RY13	Supplementary Table 6: Marker genes for transcriptomic cell types.
P2ry14	Tasic_2016	M	P2RY14	Supplementary Table 6: Marker genes for transcriptomic cell types.
Pacsin2	Tasic_2016	M	PACSIN2	Supplementary Table 6: Marker genes for transcriptomic cell types.
Palmd	Tasic_2016	M	PALMD	Supplementary Table 6: Marker genes for transcriptomic cell types.
Pappa2	Tasic_2016	M	PAPPA2	Supplementary Table 6: Marker genes for transcriptomic cell types.
Pappa2	Tasic_2018	M	PAPPA2	Figure 4c-Marker gene expression distributions within each cluster are represented by violin plots
Paqr5	Tasic_2016	M	PAQR5	Supplementary Table 6: Marker genes for transcriptomic cell types.
Pax6	Hodge	H	PAX6	Figure 1; Figure 4; Figure 6; Figure 8; Extended Data Figure 1; Extended Data Figure 2; Extended Data Figure 3; Extended Data Figure 4; Extended Data Figure 9;
Pax6	Tasic_2018	M	PAX6	Figure 1c
Pbx3	Tasic_2016	M	PBX3	Supplementary Table 6: Marker genes for transcriptomic cell types.
Pcdh15	Tasic_2016	M	PCDH15	Supplementary Table 6: Marker genes for transcriptomic cell types.
Pcdh17	Maynard	H	PCDH17	Supplementary Table 5: Using two lists of known layer-marker genes
Pcdh18	Tasic_2016	M	PCDH18	Supplementary Table 6: Marker genes for transcriptomic cell types.
Pcdh19	Tasic_2018	M	PCDH19	Figure 1c
Pcdh20	Ortiz	M	PCDH20	Result:A reduced brain palette captures whole-brain organization-"the genes that best capture the global spatial signals"-266 genes
Pcdh20	Maynard	M&H	PCDH20	Supplementary Table 5: Using two lists of known layer-marker genes
Pcdh20	Hodge	H	PCDH20	Figure 1; Figure 4; Figure 6; Extended Data Figure 1; Extended Data Figure 2; Extended Data Figure 3; Extended Data Figure 4; Extended Data Figure 9;
Pcdh8	Tasic_2016	M	PCDH8	Supplementary Table 6: Marker genes for transcriptomic cell types.
Pcolce	Tasic_2016	M	PCOLCE	Supplementary Table 6: Marker genes for transcriptomic cell types.
Pcp2	Ortiz	M	PCP2	Result:A reduced brain palette captures whole-brain organization-"the genes that best capture the global spatial signals"-266 genes
Pcp4	Ortiz	M	PCP4	Result:A reduced brain palette captures whole-brain organization-"the genes that best capture the global spatial signals"-266 genes
Pcp4	Maynard	M&H	PCP4	Supplementary Table 5: Using two lists of known layer-marker genes
Pcp4l1	Ortiz	M	PCP4L1	Result:A reduced brain palette captures whole-brain organization-"the genes that best capture the global spatial signals"-266 genes
Pcsk2	Tasic_2016	M	PCSK2	Supplementary Table 6: Marker genes for transcriptomic cell types.
Pcsk5	Tasic_2016	M	PCSK5	Supplementary Table 6: Marker genes for transcriptomic cell types.
Pde10a	Ortiz	M	PDE10A	Result:A reduced brain palette captures whole-brain organization-"the genes that best capture the global spatial signals"-266 genes
Pde11a	Tasic_2016	M	PDE11A	Supplementary Table 6: Marker genes for transcriptomic cell types.
Pde1a	Tasic_2016	M	PDE1A	Supplementary Table 6: Marker genes for transcriptomic cell types.
Pde1a	Maynard	M&H	PDE1A	Supplementary Table 5: Using two lists of known layer-marker genes
Pde1a	Tasic_2018	M	PDE1A	Figure 1c
Pde1b	Ortiz	M	PDE1B	Result:A reduced brain palette captures whole-brain organization-"the genes that best capture the global spatial signals"-266 genes
Pde1c	Tasic_2016	M	PDE1C	Supplementary Table 6: Marker genes for transcriptomic cell types.
Pdgfra	Tasic_2016	M	PDGFRA	Figure 1c-"major known marker genes"
Pdgfra	Hodge	H	PDGFRA	Figure 1; Figure 5; Figure 6; Extended Data Figure 2; Extended Data Figure 3;
Pdgfra	Tasic_2018	M	PDGFRA	Figure 1c
Pdlim5	Tasic_2018	M	PDLIM5	Figure 1c
Pdp1	Ortiz	M	PDP1	Result:A reduced brain palette captures whole-brain organization-"the genes that best capture the global spatial signals"-266 genes
Pdyn	Maynard	H	PDYN	Supplementary Table 5: Using two lists of known layer-marker genes
Penk	Ortiz	M	PENK	Result:A reduced brain palette captures whole-brain organization-"the genes that best capture the global spatial signals"-266 genes
Penk	Tasic_2016	M	PENK	Supplementary Table 6: Marker genes for transcriptomic cell types.
Penk	Maynard	M&H	PENK	Supplementary Table 5: Using two lists of known layer-marker genes
Penk	Hodge	H	PENK	Figure 1; Figure 4; Figure 6; Extended Data Figure 1; Extended Data Figure 2; Extended Data Figure 3; Extended Data Figure 4; Extended Data Figure 7; Extended Data Figure 8; Extended Data Figure 9;
Penk	Tasic_2018	M	PENK	Figure 1c
Pglyrp1	Tasic_2016	M	PGLYRP1	Supplementary Table 6: Marker genes for transcriptomic cell types.
Phlda1	Tasic_2016	M	PHLDA1	Supplementary Table 6: Marker genes for transcriptomic cell types.
Pkp2	Tasic_2018	M	PKP2	Figure 1c
Pla2g4a	Tasic_2016	M	PLA2G4A	Supplementary Table 6: Marker genes for transcriptomic cell types.
Plb1	Tasic_2016	M	PLB1	Supplementary Table 6: Marker genes for transcriptomic cell types.
Plcb4	Ortiz	M	PLCB4	Result:A reduced brain palette captures whole-brain organization-"the genes that best capture the global spatial signals"-266 genes
Plcd4	Tasic_2016	M	PLCD4	Supplementary Table 6: Marker genes for transcriptomic cell types.
Plch2	Tasic_2018	M	PLCH2	Figure 1c
Pld5	Tasic_2018	M	PLD5	Figure 1c
Plekhb1	Ortiz	M	PLEKHB1	Result:A reduced brain palette captures whole-brain organization-"the genes that best capture the global spatial signals"-266 genes
Plekhb1	Tasic_2016	M	PLEKHB1	Supplementary Table 6: Marker genes for transcriptomic cell types.
Plk2	Ortiz	M	PLK2	Result:A reduced brain palette captures whole-brain organization-"the genes that best capture the global spatial signals"-266 genes
Pllp	Ortiz	M	PLLP	Result:A reduced brain palette captures whole-brain organization-"the genes that best capture the global spatial signals"-266 genes
Plp1	Ortiz	M	PLP1	Result:A reduced brain palette captures whole-brain organization-"the genes that best capture the global spatial signals"-266 genes
Plpp3	Ortiz	M	PLPP3	Result:A reduced brain palette captures whole-brain organization-"the genes that best capture the global spatial signals"-266 genes
Pltp	Tasic_2018	M	PLTP	Figure 1c
Plxna1	Ortiz	M	PLXNA1	Result:A reduced brain palette captures whole-brain organization-"the genes that best capture the global spatial signals"-266 genes
PlxnD1	Maynard	M&H	PLXND1	Supplementary Table 5: Using two lists of known layer-marker genes
Pnoc	Tasic_2016	M	PNOC	Supplementary Table 6: Marker genes for transcriptomic cell types.
Pou3f1	Ortiz	M	POU3F1	Result:A reduced brain palette captures whole-brain organization-"the genes that best capture the global spatial signals"-266 genes
Pou3F1	Maynard	M&H	POU3F1	Supplementary Table 5: Using two lists of known layer-marker genes
Ppapdc1a	Tasic_2016	M	PPAPDC1A	Supplementary Table 6: Marker genes for transcriptomic cell types.
Ppp1r14a	Tasic_2016	M	PPP1R14A	Supplementary Table 6: Marker genes for transcriptomic cell types.
Ppp1r1a	Ortiz	M	PPP1R1A	Result:A reduced brain palette captures whole-brain organization-"the genes that best capture the global spatial signals"-266 genes
Ppp1r1b	Ortiz	M	PPP1R1B	Result:A reduced brain palette captures whole-brain organization-"the genes that best capture the global spatial signals"-266 genes
Ppp1r1b	Maynard	M&H	PPP1R1B	Supplementary Table 5: Using two lists of known layer-marker genes
Ppp3ca	Ortiz	M	PPP3CA	Result:A reduced brain palette captures whole-brain organization-"the genes that best capture the global spatial signals"-266 genes
Prdm8	Ortiz	M	PRDM8	Result:A reduced brain palette captures whole-brain organization-"the genes that best capture the global spatial signals"-266 genes
Prdm8	Tasic_2018	M	PRDM8	Figure 1c
Prdx6	Ortiz	M	PRDX6	Result:A reduced brain palette captures whole-brain organization-"the genes that best capture the global spatial signals"-266 genes
Prodh	Tasic_2016	M	PRODH	Supplementary Table 6: Marker genes for transcriptomic cell types.
Prox1	Ortiz	M	PROX1	Result:A reduced brain palette captures whole-brain organization-"the genes that best capture the global spatial signals"-266 genes
Prss12	Maynard	M&H	PRSS12	Supplementary Table 5: Using two lists of known layer-marker genes
Prss22	Tasic_2016	M	PRSS22	Supplementary Table 6: Marker genes for transcriptomic cell types.
Psd	Ortiz	M	PSD	Result:A reduced brain palette captures whole-brain organization-"the genes that best capture the global spatial signals"-266 genes
Ptchd2	Tasic_2016	M	PTCHD2	Supplementary Table 6: Marker genes for transcriptomic cell types.
Pter	Tasic_2016	M	PTER	Supplementary Table 6: Marker genes for transcriptomic cell types.
Ptgdr	Tasic_2018	M	PTGDR	Figure 1c
Ptgds	Ortiz	M	PTGDS	Result:A reduced brain palette captures whole-brain organization-"the genes that best capture the global spatial signals"-266 genes
Ptgfr	Tasic_2016	M	PTGFR	Supplementary Table 6: Marker genes for transcriptomic cell types.
Ptgfr	Tasic_2018	M	PTGFR	Figure 1c
Ptk2b	Ortiz	M	PTK2B	Result:A reduced brain palette captures whole-brain organization-"the genes that best capture the global spatial signals"-266 genes
Ptma	Ortiz	M	PTMA	Result:A reduced brain palette captures whole-brain organization-"the genes that best capture the global spatial signals"-266 genes
Ptms	Ortiz	M	PTMS	Result:A reduced brain palette captures whole-brain organization-"the genes that best capture the global spatial signals"-266 genes
Ptpn3	Ortiz	M	PTPN3	Result:A reduced brain palette captures whole-brain organization-"the genes that best capture the global spatial signals"-266 genes
Ptpn4	Ortiz	M	PTPN4	Result:A reduced brain palette captures whole-brain organization-"the genes that best capture the global spatial signals"-266 genes
Ptprb	Tasic_2016	M	PTPRB	Supplementary Table 6: Marker genes for transcriptomic cell types.
Ptprk	Tasic_2016	M	PTPRK	Supplementary Table 6: Marker genes for transcriptomic cell types.
Ptprt	Tasic_2018	M	PTPRT	Figure 1c
Ptpru	Tasic_2016	M	PTPRU	Supplementary Table 6: Marker genes for transcriptomic cell types.
Ptprz1	Ortiz	M	PTPRZ1	Result:A reduced brain palette captures whole-brain organization-"the genes that best capture the global spatial signals"-266 genes
Ptrf	Tasic_2018	M	PTRF	Figure 1c
Pvalb	Ortiz	M	PVALB	Result:A reduced brain palette captures whole-brain organization-"the genes that best capture the global spatial signals"-266 genes
Pvalb	Tasic_2016	M	PVALB	Figure 1c-"major known marker genes"; Supplementary Table 6: Marker genes for transcriptomic cell types.
Pvalb	Hodge	H	PVALB	Figure 1; Figure 4; Figure 6; Figure 8; Extended Data Figure 1; Extended Data Figure 2; Extended Data Figure 4; Extended Data Figure 9;
Pvalb	Tasic_2018	M	PVALB	Figure 1c; Figure 4c-Marker gene expression distributions within each cluster are represented by violin plots
Pvrl3	Maynard	M&H	PVRL3	Figure 6;
Pvrl4	Tasic_2016	M	PVRL4	Supplementary Table 6: Marker genes for transcriptomic cell types.
Pygm	Tasic_2018	M	PYGM	Figure 1c
Qpct	Hodge	H	QPCT	Figure 1; Figure 4; Figure 6; Extended Data Figure 1; Extended Data Figure 2; Extended Data Figure 3; Extended Data Figure 4; Extended Data Figure 9;
Qrfpr	Tasic_2016	M	QRFPR	Supplementary Table 6: Marker genes for transcriptomic cell types.
Rac3	Maynard	M&H	RAC3	Supplementary Table 5: Using two lists of known layer-marker genes
Ramp3	Ortiz	M	RAMP3	Result:A reduced brain palette captures whole-brain organization-"the genes that best capture the global spatial signals"-266 genes
Rapgef3	Tasic_2018	M	RAPGEF3	Figure 4c-Marker gene expression distributions within each cluster are represented by violin plots
Rasd2	Ortiz	M	RASD2	Result:A reduced brain palette captures whole-brain organization-"the genes that best capture the global spatial signals"-266 genes
Rasgrf2	Ortiz	M	RASGRF2	ST at the whole-brain scale; Figure 1;
Rasgrf2	Maynard	M&H	RASGRF2	Supplementary Table 5: Using two lists of known layer-marker genes
Rasgrp1	Ortiz	M	RASGRP1	Result:A reduced brain palette captures whole-brain organization-"the genes that best capture the global spatial signals"-266 genes
Rasl11a	Tasic_2016	M	RASL11A	Supplementary Table 6: Marker genes for transcriptomic cell types.
Rassf10	Tasic_2018	M	RASSF10	Figure 1c
Rcan2	Tasic_2016	M	RCAN2	Supplementary Table 6: Marker genes for transcriptomic cell types.
Reln	Tasic_2016	M	RELN	Supplementary Table 6: Marker genes for transcriptomic cell types.
Reln	Maynard	M&H	RELN	Supplementary Table 5: Using two lists of known layer-marker genes
Reln	Tasic_2018	M	RELN	Figure 1c; Overall cell type taxonomy-"CR–Lhx5 corresponds to Cajal–Retzius (CR) cells based on their location in L1 and expression of known Cajal–Retzius mark ers, such as Trp73, Lhx5 and Reln"
Resp18	Ortiz	M	RESP18	Result:A reduced brain palette captures whole-brain organization-"the genes that best capture the global spatial signals"-266 genes
Rfx3	Ortiz	M	RFX3	Result:A reduced brain palette captures whole-brain organization-"the genes that best capture the global spatial signals"-266 genes
Rgs12	Tasic_2016	M	RGS12	Supplementary Table 6: Marker genes for transcriptomic cell types.
Rgs4	Ortiz	M	RGS4	Result:A reduced brain palette captures whole-brain organization-"the genes that best capture the global spatial signals"-266 genes
Rgs4	Tasic_2016	M	RGS4	Supplementary Table 6: Marker genes for transcriptomic cell types.
Rgs8	Ortiz	M	RGS8	Result:A reduced brain palette captures whole-brain organization-"the genes that best capture the global spatial signals"-266 genes
Rgs8	Tasic_2016	M	RGS8	Supplementary Table 6: Marker genes for transcriptomic cell types.
Rgs8	Maynard	M&H	RGS8	Supplementary Table 5: Using two lists of known layer-marker genes
Rit2	Ortiz	M	RIT2	Result:A reduced brain palette captures whole-brain organization-"the genes that best capture the global spatial signals"-266 genes
Rnd3	Tasic_2016	M	RND3	Supplementary Table 6: Marker genes for transcriptomic cell types.
Rnf122	Tasic_2016	M	RNF122	Supplementary Table 6: Marker genes for transcriptomic cell types.
Rora	Ortiz	M	RORA	ST at the whole-brain scale; Figure 1
Rorb	Ortiz	M	RORB	Figure 3;
Rorb	Tasic_2016	M	RORB	Figure 1c-"major known marker genes"; Supplementary Table 6: Marker genes for transcriptomic cell types.
Rorb	Maynard	M&H	RORB	Supplementary Table 5: Using two lists of known layer-marker genes
Rorb	Hodge	H	RORB	Figure 1; Figure 2; Figure 6; Figure 7; Figure 8; Extended Data Figure 1; Extended Data Figure 2; Extended Data Figure 5; Extended Data Figure 6; Extended Data Figure 8; Extended Data Figure 9;
Rorb	Tasic_2018	M	RORB	Figure 4c-Marker gene expression distributions within each cluster are represented by violin plots
Rpp25	Tasic_2016	M	RPP25	Supplementary Table 6: Marker genes for transcriptomic cell types.
Rprm	Ortiz	M	RPRM	Result:A reduced brain palette captures whole-brain organization-"the genes that best capture the global spatial signals"-266 genes
Rprm	Tasic_2016	M	RPRM	Supplementary Table 6: Marker genes for transcriptomic cell types.
Rprm	Maynard	M&H	RPRM	Supplementary Table 5: Using two lists of known layer-marker genes
Rprm	Tasic_2018	M	RPRM	Figure 1c; Figure 4c-Marker gene expression distributions within each cluster are represented by violin plots
Rspo1	Tasic_2016	M	RSPO1	Supplementary Table 6: Marker genes for transcriptomic cell types.
Rspo1	Tasic_2018	M	RSPO1	Figure 1c; Figure 4c-Marker gene expression distributions within each cluster are represented by violin plots
Rspo4	Tasic_2018	M	RSPO4	Figure 1c
Runx1t1	Tasic_2016	M	RUNX1T1	Supplementary Table 6: Marker genes for transcriptomic cell types.
Rxfp1	Maynard	M&H	RXFP1	Supplementary Table 5: Using two lists of known layer-marker genes
Rxfp1	Tasic_2018	M	RXFP1	Figure 1c
S100a10	Maynard	M&H	S100A10	Supplementary Table 5: Using two lists of known layer-marker genes
S100b	Ortiz	M	S100B	Result:A reduced brain palette captures whole-brain organization-"the genes that best capture the global spatial signals"-266 genes
Samd3	Tasic_2016	M	SAMD3	Supplementary Table 6: Marker genes for transcriptomic cell types.
Satb1	Ortiz	M	SATB1	Result:A reduced brain palette captures whole-brain organization-"the genes that best capture the global spatial signals"-266 genes
Satb1	Tasic_2016	M	SATB1	Supplementary Table 6: Marker genes for transcriptomic cell types.
Satb2	Maynard	M&H	SATB2	Supplementary Table 5: Using two lists of known layer-marker genes
Sbk1	Ortiz	M	SBK1	Result:A reduced brain palette captures whole-brain organization-"the genes that best capture the global spatial signals"-266 genes
Scg2	Ortiz	M	SCG2	Result:A reduced brain palette captures whole-brain organization-"the genes that best capture the global spatial signals"-266 genes
Scml4	Tasic_2016	M	SCML4	Supplementary Table 6: Marker genes for transcriptomic cell types.
Scn1b	Ortiz	M	SCN1B	Result:A reduced brain palette captures whole-brain organization-"the genes that best capture the global spatial signals"-266 genes
Scn3b	Maynard	H	SCN3B	Supplementary Table 5: Using two lists of known layer-marker genes
Scn4b	Ortiz	M	SCN4B	Result:A reduced brain palette captures whole-brain organization-"the genes that best capture the global spatial signals"-266 genes
Scn4b	Maynard	M&H	SCN4B	Supplementary Table 5: Using two lists of known layer-marker genes
Scn4b	Hodge	H	SCN4B	Figure 1; Figure 2; Figure 6; Figure 7; Extended Data Figure 1; Extended Data Figure 2; Extended Data Figure 3; Extended Data Figure 5; Extended Data Figure 9;
Scnn1a	Tasic_2016	M	SCNN1A	Supplementary Table 6: Marker genes for transcriptomic cell types.
Scnn1a	Tasic_2018	M	SCNN1A	Figure 4c-Marker gene expression distributions within each cluster are represented by violin plots
Scrg1	Tasic_2016	M	SCRG1	Supplementary Table 6: Marker genes for transcriptomic cell types.
Scube1	Hodge	H	SCUBE1	Figure 1; Figure 2; Figure 6; Figure 7; Extended Data Figure 1; Extended Data Figure 2; Extended Data Figure 3; Extended Data Figure 5; Extended Data Figure 9;
Scube3	Hodge	H	SCUBE3	Figure 1; Figure 4; Figure 6; Extended Data Figure 1; Extended Data Figure 2; Extended Data Figure 3; Extended Data Figure 4; Extended Data Figure 9;
Sema3c	Tasic_2016	M	SEMA3C	Supplementary Table 6: Marker genes for transcriptomic cell types.
Sema3c	Maynard	H	SEMA3C	Supplementary Table 5: Using two lists of known layer-marker genes
Sema3c	Tasic_2018	M	SEMA3C	Figure 1c
Sema3e	Maynard	M&H	SEMA3E	Supplementary Table 5: Using two lists of known layer-marker genes
Sema3e	Hodge	H	SEMA3E	Figure 1; Figure 2; Figure 6; Figure 7; Extended Data Figure 1; Extended Data Figure 2; Extended Data Figure 3; Extended Data Figure 5; Extended Data Figure 9;
Sema3e	Tasic_2018	M	SEMA3E	Figure 1c
Sema5b	Tasic_2016	M	SEMA5B	Supplementary Table 6: Marker genes for transcriptomic cell types.
Septin4	Ortiz	M	SEPTIN4	Result:A reduced brain palette captures whole-brain organization-"the genes that best capture the global spatial signals"-266 genes
Serpinb1a	Tasic_2018	M	SERPINB1A	Figure 1c
Serpinf1	Hodge	H	SERPINF1	Figure 1; Figure 4; Extended Data Figure 1; Extended Data Figure 2; Extended Data Figure 3; Extended Data Figure 4; Extended Data Figure 9;
Serpinf1	Tasic_2018	M	SERPINF1	Figure 1c
Serping1	Tasic_2016	M	SERPING1	Supplementary Table 6: Marker genes for transcriptomic cell types.
Serpini1	Ortiz	M	SERPINI1	Result:A reduced brain palette captures whole-brain organization-"the genes that best capture the global spatial signals"-266 genes
Sez6	Ortiz	M	SEZ6	Result:A reduced brain palette captures whole-brain organization-"the genes that best capture the global spatial signals"-266 genes
Sez6l2	Ortiz	M	SEZ6L2	Result:A reduced brain palette captures whole-brain organization-"the genes that best capture the global spatial signals"-266 genes
Sgpp2	Tasic_2016	M	SGPP2	Supplementary Table 6: Marker genes for transcriptomic cell types.
Shisa3	Tasic_2016	M	SHISA3	Supplementary Table 6: Marker genes for transcriptomic cell types.
Shisal2b	Tasic_2018	M	SHISAL2B	Figure 1c
Shox2	Ortiz	M	SHOX2	Result:A reduced brain palette captures whole-brain organization-"the genes that best capture the global spatial signals"-266 genes
Siglech	Tasic_2018	M	SIGLECH	Figure 1c
Sit1	Tasic_2016	M	SIT1	Supplementary Table 6: Marker genes for transcriptomic cell types.
Six3	Ortiz	M	SIX3	Result:A reduced brain palette captures whole-brain organization-"the genes that best capture the global spatial signals"-266 genes
Sla	Tasic_2016	M	SLA	Supplementary Table 6: Marker genes for transcriptomic cell types.
Sla	Tasic_2018	M	SLA	Figure 1c
Slc14a1	Hodge	H	SLC14A1	Figure 1; Figure 5; Figure 6; Extended Data Figure 1; Extended Data Figure 2; Extended Data Figure 3;
Slc16a4	Tasic_2016	M	SLC16A4	Supplementary Table 6: Marker genes for transcriptomic cell types.
Slc17a6	Ortiz	M	SLC17A6	Result:A reduced brain palette captures whole-brain organization-"the genes that best capture the global spatial signals"-266 genes
Slc17a7	Ortiz	M	SLC17A7	Result:A reduced brain palette captures whole-brain organization-"the genes that best capture the global spatial signals"-266 genes
Slc17a7	Tasic_2016	M	SLC17A7	Figure 1c-"major known marker genes"
Slc17a7	Hodge	H	SLC17A7	Figure 1; Figure 2; Figure 6; Figure 7; Extended Data Figure 1; Extended Data Figure 2; Extended Data Figure 5; Extended Data Figure 6; Extended Data Figure 7; Extended Data Figure 8; Extended Data Figure 9; Extended Data Figure 11;
Slc17a8	Tasic_2018	M	SLC17A8	Figure 1c; Figure 4c-Marker gene expression distributions within each cluster are represented by violin plots
Slc18a2	Ortiz	M	SLC18A2	Result:A reduced brain palette captures whole-brain organization-"the genes that best capture the global spatial signals"-266 genes
Slc18a3	Tasic_2016	M	SLC18A3	Supplementary Table 6: Marker genes for transcriptomic cell types.
Slc18a3	Tasic_2018	M	SLC18A3	Figure 1c
Slc1a2	Ortiz	M	SLC1A2	Figure 3;
Slc1a3	Ortiz	M	SLC1A3	Result:A reduced brain palette captures whole-brain organization-"the genes that best capture the global spatial signals"-266 genes
Slc1a3	Hodge	H	SLC1A3	Figure 1; Figure 5;
Slc30a3	Tasic_2016	M	SLC30A3	Supplementary Table 6: Marker genes for transcriptomic cell types.
Slc30a3	Tasic_2018	M	SLC30A3	Figure 4c-Marker gene expression distributions within each cluster are represented by violin plots
Slc32a1	Ortiz	M	SLC32A1	Result:A reduced brain palette captures whole-brain organization-"the genes that best capture the global spatial signals"-266 genes
Slc38a11	Tasic_2016	M	SLC38A11	Supplementary Table 6: Marker genes for transcriptomic cell types.
Slc39a12	Tasic_2016	M	SLC39A12	Supplementary Table 6: Marker genes for transcriptomic cell types.
Slc44a5	Tasic_2016	M	SLC44A5	Supplementary Table 6: Marker genes for transcriptomic cell types.
Slc4a4	Ortiz	M	SLC4A4	Result:A reduced brain palette captures whole-brain organization-"the genes that best capture the global spatial signals"-266 genes
Slc4a4	Tasic_2016	M	SLC4A4	Supplementary Table 6: Marker genes for transcriptomic cell types.
Slc6a11	Ortiz	M	SLC6A11	Result:A reduced brain palette captures whole-brain organization-"the genes that best capture the global spatial signals"-266 genes
Slc6a11	Tasic_2016	M	SLC6A11	Supplementary Table 6: Marker genes for transcriptomic cell types.
Slc6a20a	Tasic_2016	M	SLC6A20	Supplementary Table 6: Marker genes for transcriptomic cell types.
Slc6a3	Ortiz	M	SLC6A3	Result:A reduced brain palette captures whole-brain organization-"the genes that best capture the global spatial signals"-266 genes
Slco1c1	Tasic_2016	M	SLCO1C1	Supplementary Table 6: Marker genes for transcriptomic cell types.
Slco2a1	Tasic_2018	M	SLCO2A1	Figure 1c
Slitrk1	Maynard	M&H	SLITRK1	Supplementary Table 5: Using two lists of known layer-marker genes
Snap25	Tasic_2016	M	SNAP25	Figure 1c-"major known marker genes"
Snap25	Maynard	H	SNAP25	Figure 1cd; Result-"The orientation of each sample was confirmed by delineating the border between layer 6 (L6) and the adjacent white matter (WM) and identifying layer L5, using marker genes for gray matter/neurons (SNAP25), WM/oligodendrocytes (MOBP) and L5 (PCP4) in each tissue section"
Snca	Ortiz	M	SNCA	Result:A reduced brain palette captures whole-brain organization-"the genes that best capture the global spatial signals"-266 genes
Snca	Tasic_2016	M	SNCA	Supplementary Table 6: Marker genes for transcriptomic cell types.
Sncg	Tasic_2016	M	SNCG	Supplementary Table 6: Marker genes for transcriptomic cell types.
Sncg	Maynard	H	SNCG	Supplementary Table 5: Using two lists of known layer-marker genes
Sncg	Tasic_2018	M	SNCG	Figure 1c
Sorcs3	Tasic_2016	M	SORCS3	Supplementary Table 6: Marker genes for transcriptomic cell types.
Sorl1	Tasic_2016	M	SORL1	Supplementary Table 6: Marker genes for transcriptomic cell types.
Sostdc1	Ortiz	M	SOSTDC1	Result:A reduced brain palette captures whole-brain organization-"the genes that best capture the global spatial signals"-266 genes
Sox11	Ortiz	M	SOX11	Result:A reduced brain palette captures whole-brain organization-"the genes that best capture the global spatial signals"-266 genes
Sox2	Ortiz	M	SOX2	Result:A reduced brain palette captures whole-brain organization-"the genes that best capture the global spatial signals"-266 genes
Sox5	Maynard	M&H	SOX5	Supplementary Table 5: Using two lists of known layer-marker genes
Spag17	Hodge	H	SPAG17	Figure 1; Figure 4; Figure 6; Extended Data Figure 1; Extended Data Figure 2; Extended Data Figure 3; Extended Data Figure 4; Extended Data Figure 9;
Sparc	Ortiz	M	SPARC	Result:A reduced brain palette captures whole-brain organization-"the genes that best capture the global spatial signals"-266 genes
Sparc	Tasic_2016	M	SPARC	Supplementary Table 6: Marker genes for transcriptomic cell types.
Sparcl1	Tasic_2016	M	SPARCL1	Supplementary Table 6: Marker genes for transcriptomic cell types.
Spon1	Tasic_2016	M	SPON1	Supplementary Table 6: Marker genes for transcriptomic cell types.
Spon1	Tasic_2018	M	SPON1	Figure 1c
Spp1	Ortiz	M	SPP1	Result:A reduced brain palette captures whole-brain organization-"the genes that best capture the global spatial signals"-266 genes
Spp1	Tasic_2016	M	SPP1	Supplementary Table 6: Marker genes for transcriptomic cell types.
Spp1	Tasic_2018	M	SPP1	Figure 1c
Sst	Ortiz	M	SST	Result:A reduced brain palette captures whole-brain organization-"the genes that best capture the global spatial signals"-266 genes
Sst	Tasic_2016	M	SST	Figure 1c-"major known marker genes"
Sst	Hodge	H	SST	Figure 1; Figure 4; Figure 6; Figure 8; Extended Data Figure 1; Extended Data Figure 2; Extended Data Figure 4; Extended Data Figure 9;
St18	Tasic_2016	M	ST18	Supplementary Table 6: Marker genes for transcriptomic cell types.
St6galnac5	Tasic_2016	M	ST6GALNAC5	Supplementary Table 6: Marker genes for transcriptomic cell types.
Stac	Tasic_2016	M	STAC	Supplementary Table 6: Marker genes for transcriptomic cell types.
Stard8	Tasic_2016	M	STARD8	Supplementary Table 6: Marker genes for transcriptomic cell types.
Stk32a	Hodge	H	STK32A	Figure 1; Figure 4; Figure 6; Extended Data Figure 1; Extended Data Figure 2; Extended Data Figure 3; Extended Data Figure 4; Extended Data Figure 9;
Stk32c	Ortiz	M	STK32C	Result:A reduced brain palette captures whole-brain organization-"the genes that best capture the global spatial signals"-266 genes
Stum	Ortiz	M	STUM	Result:A reduced brain palette captures whole-brain organization-"the genes that best capture the global spatial signals"-266 genes
Stx1a	Ortiz	M	STX1A	Result:A reduced brain palette captures whole-brain organization-"the genes that best capture the global spatial signals"-266 genes
Sulf1	Hodge	H	SULF1	Figure 1; Figure 4; Figure 6; Extended Data Figure 1; Extended Data Figure 2; Extended Data Figure 3; Extended Data Figure 4; Extended Data Figure 9;
Sulf2	Tasic_2016	M	SULF2	Supplementary Table 6: Marker genes for transcriptomic cell types.
Susd3	Tasic_2016	M	SUSD3	Supplementary Table 6: Marker genes for transcriptomic cell types.
Sv2b	Ortiz	M	SV2B	Result:A reduced brain palette captures whole-brain organization-"the genes that best capture the global spatial signals"-266 genes
Sv2c	Maynard	H	SV2C	Supplementary Table 5: Using two lists of known layer-marker genes
Syngr1	Ortiz	M	SYNGR1	Result:A reduced brain palette captures whole-brain organization-"the genes that best capture the global spatial signals"-266 genes
Synpr	Ortiz	M	SYNPR	Result:A reduced brain palette captures whole-brain organization-"the genes that best capture the global spatial signals"-266 genes
Synpr	Maynard	H	SYNPR	Supplementary Table 5: Using two lists of known layer-marker genes
Synpr	Tasic_2018	M	SYNPR	Figure 1c
Syt10	Tasic_2016	M	SYT10	Supplementary Table 6: Marker genes for transcriptomic cell types.
Syt10	Maynard	M&H	SYT10	Supplementary Table 5: Using two lists of known layer-marker genes
Syt17	Tasic_2016	M	SYT17	Supplementary Table 6: Marker genes for transcriptomic cell types.
Syt17	Maynard	M&H	SYT17	Supplementary Table 5: Using two lists of known layer-marker genes
Syt2	Maynard	M&H	SYT2	Supplementary Table 5: Using two lists of known layer-marker genes
Syt6	Maynard	M&H	SYT6	Supplementary Table 5: Using two lists of known layer-marker genes
Syt6	Hodge	H	SYT6	Figure 1; Figure 4; Figure 6; Extended Data Figure 1; Extended Data Figure 2; Extended Data Figure 3; Extended Data Figure 4; Extended Data Figure 9;
Syt9	Maynard	M&H	SYT9	Supplementary Table 5: Using two lists of known layer-marker genes
Tac1	Ortiz	M	TAC1	Result:A reduced brain palette captures whole-brain organization-"the genes that best capture the global spatial signals"-266 genes
Tac1	Tasic_2016	M	TAC1	Supplementary Table 6: Marker genes for transcriptomic cell types.
Tac1	Tasic_2018	M	TAC1	Figure 1c
Tac2	Tasic_2016	M	TAC2	Supplementary Table 6: Marker genes for transcriptomic cell types.
Tac2	Tasic_2018	M	TAC2	Figure 1c
Tacr1	Tasic_2016	M	TACR1	Supplementary Table 6: Marker genes for transcriptomic cell types.
Tacr3	Tasic_2016	M	TACR3	Supplementary Table 6: Marker genes for transcriptomic cell types.
Tacr3	Tasic_2018	M	TACR3	Figure 1c
Tacstd2	Tasic_2018	M	TACSTD2	Figure 1c
Tafa1	Tasic_2018	M	TAFA1	Figure 1c
Tafa2	Ortiz	M	TAFA2	Result:A reduced brain palette captures whole-brain organization-"the genes that best capture the global spatial signals"-266 genes
Tbc1d4	Tasic_2016	M	TBC1D4	Supplementary Table 6: Marker genes for transcriptomic cell types.
Tbc1d9	Ortiz	M	TBC1D9	Result:A reduced brain palette captures whole-brain organization-"the genes that best capture the global spatial signals"-266 genes
Tbr1	Ortiz	M	TBR1	Result:A reduced brain palette captures whole-brain organization-"the genes that best capture the global spatial signals"-266 genes
Tbr1	Tasic_2016	M	TBR1	Supplementary Table 6: Marker genes for transcriptomic cell types.
Tbr1	Maynard	M&H	TBR1	Supplementary Table 5: Using two lists of known layer-marker genes
Tcap	Tasic_2016	M	TCAP	Supplementary Table 6: Marker genes for transcriptomic cell types.
Tceal7	Tasic_2016	M	TCEAL7	Supplementary Table 6: Marker genes for transcriptomic cell types.
Tcf7l2	Ortiz	M	TCF7L2	Result:A reduced brain palette captures whole-brain organization-"the genes that best capture the global spatial signals"-266 genes
Tenm2	Ortiz	M	TENM2	Result:A reduced brain palette captures whole-brain organization-"the genes that best capture the global spatial signals"-266 genes
Tgfb1	Tasic_2018	M	TGFB1	Figure 1c
Tgfbr3	Tasic_2016	M	TGFBR3	Supplementary Table 6: Marker genes for transcriptomic cell types.
Th	Tasic_2016	M	TH	Supplementary Table 6: Marker genes for transcriptomic cell types.
Th	Maynard	M&H	TH	Supplementary Table 5: Using two lists of known layer-marker genes
Th	Hodge	H	TH	Figure 1; Figure 4; Figure 6; Extended Data Figure 1; Extended Data Figure 2; Extended Data Figure 3; Extended Data Figure 4; Extended Data Figure 9;
Th	Tasic_2018	M	TH	Figure 1c
Themis	Hodge	H	THEMIS	Figure 1; Figure 2; Figure 6; Figure 7; Extended Data Figure 1; Extended Data Figure 2; Extended Data Figure 5; Extended Data Figure 9;
Thsd7a	Tasic_2016	M	THSD7A	Supplementary Table 6: Marker genes for transcriptomic cell types.
Thsd7b	Tasic_2016	M	THSD7B	Supplementary Table 6: Marker genes for transcriptomic cell types.
Timp3	Tasic_2016	M	TIMP3	Supplementary Table 6: Marker genes for transcriptomic cell types.
Tle1	Maynard	M&H	TLE1	Supplementary Table 5: Using two lists of known layer-marker genes
Tle3	Maynard	M&H	TLE3	Supplementary Table 5: Using two lists of known layer-marker genes
Tle4	Ortiz	M	TLE4	Result:A reduced brain palette captures whole-brain organization-"the genes that best capture the global spatial signals"-266 genes
Tle4	Maynard	M&H	TLE4	Supplementary Table 5: Using two lists of known layer-marker genes
Tll1	Tasic_2016	M	TLL1	Supplementary Table 6: Marker genes for transcriptomic cell types.
Tmeff2	Tasic_2016	M	TMEFF2	Supplementary Table 6: Marker genes for transcriptomic cell types.
Tmem119	Tasic_2016	M	TMEM119	Supplementary Table 6: Marker genes for transcriptomic cell types.
Tmem158	Ortiz	M	TMEM158	Result:A reduced brain palette captures whole-brain organization-"the genes that best capture the global spatial signals"-266 genes
Tmem163	Maynard	M&H	TMEM163	Supplementary Table 5: Using two lists of known layer-marker genes
Tmem163	Tasic_2018	M	TMEM163	Figure 1c
Tmem182	Tasic_2016	M	TMEM182	Supplementary Table 6: Marker genes for transcriptomic cell types.
Tmem182	Tasic_2018	M	TMEM182	Figure 1c
Tmem215	Tasic_2016	M	TMEM215	Supplementary Table 6: Marker genes for transcriptomic cell types.
Tmem40	Tasic_2016	M	TMEM40	Supplementary Table 6: Marker genes for transcriptomic cell types.
Tmem91	Tasic_2016	M	TMEM91	Supplementary Table 6: Marker genes for transcriptomic cell types.
Tnc	Tasic_2018	M	TNC	Figure 1c
Tnfaip8l3	Tasic_2016	M	TNFAIP8L3	Supplementary Table 6: Marker genes for transcriptomic cell types.
Tnfaip8l3	Hodge	H	TNFAIP8L3	Figure 1; Figure 4; Extended Data Figure 1; Extended Data Figure 2; Extended Data Figure 3; Extended Data Figure 4; Extended Data Figure 9;
Tnmd	Tasic_2016	M	TNMD	Supplementary Table 6: Marker genes for transcriptomic cell types.
Tnni3k	Tasic_2016	M	TNNI3K	Supplementary Table 6: Marker genes for transcriptomic cell types.
Tnnt1	Tasic_2016	M	TNNT1	Supplementary Table 6: Marker genes for transcriptomic cell types.
Tox	Maynard	M&H	TOX	Supplementary Table 5: Using two lists of known layer-marker genes
Tox2	Tasic_2018	M	TOX2	Figure 1c
Tpbg	Tasic_2016	M	TPBG	Supplementary Table 6: Marker genes for transcriptomic cell types.
Tpbg	Maynard	M&H	TPBG	Supplementary Table 5: Using two lists of known layer-marker genes
Tpbg	Tasic_2018	M	TPBG	Figure 1c
Tpbgl	Tasic_2016	M	TPBGL	Supplementary Table 6: Marker genes for transcriptomic cell types.
Tpd52l1	Tasic_2016	M	TPD52L1	Supplementary Table 6: Marker genes for transcriptomic cell types.
Traip	Tasic_2016	M	TRAIP	Supplementary Table 6: Marker genes for transcriptomic cell types.
Trem2	Tasic_2016	M	TREM2	Supplementary Table 6: Marker genes for transcriptomic cell types.
Trf	Ortiz	M	TRF	Result:A reduced brain palette captures whole-brain organization-"the genes that best capture the global spatial signals"-266 genes
Trh	Tasic_2016	M	TRH	Supplementary Table 6: Marker genes for transcriptomic cell types.
Trh	Tasic_2018	M	TRH	Figure 1c; Figure 4c-Marker gene expression distributions within each cluster are represented by violin plots
Trhr	Tasic_2018	M	TRHR	Figure 1c; Figure 4c-Marker gene expression distributions within each cluster are represented by violin plots
Trib2	Maynard	M&H	TRIB2	Supplementary Table 5: Using two lists of known layer-marker genes
Trmt9b	Maynard	M&H	TRMT9B	Figure 6;
Trp73	Tasic_2018	M	TRP73	Overall cell type taxonomy-"CR–Lhx5 corresponds to Cajal–Retzius (CR) cells based on their location in L1 and expression of known Cajal–Retzius mark ers, such as Trp73, Lhx5 and Reln"
Trpm3	Ortiz	M	TRPM3	Result:A reduced brain palette captures whole-brain organization-"the genes that best capture the global spatial signals"-266 genes
Trpv6	Tasic_2016	M	TRPV6	Supplementary Table 6: Marker genes for transcriptomic cell types.
Tshz2	Tasic_2018	M	TSHZ2	Figure 4c-Marker gene expression distributions within each cluster are represented by violin plots
Tspan12	Hodge	H	TSPAN12	Figure 1; Figure 4; Figure 6; Extended Data Figure 1; Extended Data Figure 2; Extended Data Figure 3; Extended Data Figure 4; Extended Data Figure 9;
Tspan2	Ortiz	M	TSPAN2	Result:A reduced brain palette captures whole-brain organization-"the genes that best capture the global spatial signals"-266 genes
Ttc12	Hodge	H	TTC12	Figure 1; Figure 2; Figure 6; Figure 7; Extended Data Figure 1; Extended Data Figure 2; Extended Data Figure 3; Extended Data Figure 5; Extended Data Figure 9;
Ttc39a	Tasic_2016	M	TTC39A	Supplementary Table 6: Marker genes for transcriptomic cell types.
Ttc9b	Ortiz	M	TTC9B	Result:A reduced brain palette captures whole-brain organization-"the genes that best capture the global spatial signals"-266 genes
Tubb4a	Ortiz	M	TUBB4A	Result:A reduced brain palette captures whole-brain organization-"the genes that best capture the global spatial signals"-266 genes
Tusc5	Tasic_2016	M	TUSC5	Supplementary Table 6: Marker genes for transcriptomic cell types.
Twist2	Hodge	H	TWIST2	Figure 1; Figure 2; Figure 6; Figure 7; Extended Data Figure 1; Extended Data Figure 2; Extended Data Figure 3; Extended Data Figure 5; Extended Data Figure 9;
Tyr	Hodge	H	TYR	Figure 1; Figure 4; Figure 6; Extended Data Figure 1; Extended Data Figure 2; Extended Data Figure 3; Extended Data Figure 4; Extended Data Figure 9;
Tyrobp	Hodge	H	TYROBP	Figure 1; Figure 5; Figure 6; Figure 8; Extended Data Figure 1; Extended Data Figure 2; Extended Data Figure 3;
Ugt8a	Ortiz	M	UGT8A	Result:A reduced brain palette captures whole-brain organization-"the genes that best capture the global spatial signals"-266 genes
Unc13c	Ortiz	M	UNC13C	Result:A reduced brain palette captures whole-brain organization-"the genes that best capture the global spatial signals"-266 genes
unc5d	Maynard	M&H	UNC5D	Supplementary Table 5: Using two lists of known layer-marker genes
Vamp1	Ortiz	M	VAMP1	Result:A reduced brain palette captures whole-brain organization-"the genes that best capture the global spatial signals"-266 genes
Vat1l	Maynard	M&H	VAT1L	Supplementary Table 5: Using two lists of known layer-marker genes
Vcam1	Tasic_2016	M	VCAM1	Supplementary Table 6: Marker genes for transcriptomic cell types.
Vcan	Tasic_2016	M	VCAN	Supplementary Table 6: Marker genes for transcriptomic cell types.
Vim	Ortiz	M	VIM	Result:A reduced brain palette captures whole-brain organization-"the genes that best capture the global spatial signals"-266 genes
Vip	Tasic_2016	M	VIP	Figure 1c-"major known marker genes"
Vip	Hodge	H	VIP	Figure 1; Figure 4; Figure 6; Figure 8; Extended Data Figure 1; Extended Data Figure 2; Extended Data Figure 4; Extended Data Figure 9;
Vipr2	Tasic_2018	M	VIPR2	Figure 1c
Vstm2l	Ortiz	M	VSTM2L	Result:A reduced brain palette captures whole-brain organization-"the genes that best capture the global spatial signals"-266 genes
Vtn	Ortiz	M	VTN	Result:A reduced brain palette captures whole-brain organization-"the genes that best capture the global spatial signals"-266 genes
Vtn	Tasic_2016	M	VTN	Supplementary Table 6: Marker genes for transcriptomic cell types.
Wfs1	Ortiz	M	WFS1	Result:A reduced brain palette captures whole-brain organization-"the genes that best capture the global spatial signals"-266 genes
Wfs1	Tasic_2016	M	WFS1	Supplementary Table 6: Marker genes for transcriptomic cell types.
Wfs1	Maynard	M&H	WFS1	Supplementary Table 5: Using two lists of known layer-marker genes
Whrn	Tasic_2016	M	WHRN	Supplementary Table 6: Marker genes for transcriptomic cell types.
Whrn	Tasic_2018	M	WHRN	Figure 1c
Wipf3	Ortiz	M	WIPF3	Result:A reduced brain palette captures whole-brain organization-"the genes that best capture the global spatial signals"-266 genes
Wls	Tasic_2018	M	WLS	Figure 1c
Zbtb18	Ortiz	M	ZBTB18	Result:A reduced brain palette captures whole-brain organization-"the genes that best capture the global spatial signals"-266 genes
Zbtb20	Ortiz	M	ZBTB20	Result:A reduced brain palette captures whole-brain organization-"the genes that best capture the global spatial signals"-266 genes
Zcchc12	Ortiz	M	ZCCHC12	Result:A reduced brain palette captures whole-brain organization-"the genes that best capture the global spatial signals"-266 genes
Zcchc12	Tasic_2016	M	ZCCHC12	Supplementary Table 6: Marker genes for transcriptomic cell types.
Zic1	Ortiz	M	ZIC1	Figure 3;
Zmat4	Tasic_2016	M	ZMAT4	Supplementary Table 6: Marker genes for transcriptomic cell types.
