# Supplementary material for: Spatial omics representation and functional tissue module inference using graph Fourier transform
Source: bioRxiv preprint, doi:10.1101/2022.12.10.519929, version 3 (2023-03-21)
Supplement: Supp Table 15 [file 519929_file33.xlsx]

## Sheet: Sheet1
SpotID	B_Cycling	B_GC_DZ	B_GC_LZ	B_GC_prePB	B_IFN	B_activated	B_mem	B_naive	B_plasma	B_preGC	DC_CCR7	DC_cDC1	DC_cDC2	DC_pDC	Endo	FDC	ILC	Macrophages_M1	Macrophages_M2	Mast	Monocytes	NK	NKT	T_CD4	T_CD4_TfH	T_CD4_TfH_GC	T_CD4_naive	T_CD8_CD161	T_CD8_cytotoxic	T_CD8_naive	T_TIM3	T_TfR	T_Treg	VSMC
AAACAAGTATCTCCCA-1	0.0168906	0.00797118	0.0104104	0.00126384	0.017617	0.0969982	0.0530423	0.102431	0.125921	0.0389875	0.0113268	0.00956655	0.01446	0.0304938	0.0609531	0.00458793	0.0252441	0.0137042	0.0234124	0.0281765	0.0238421	0.0243756	0.00749477	0.0118972	0.017274	0.00775518	0.0378335	0.0142954	0.0217067	0.0329979	0.0505921	0.013454	0.0149131	0.02811
AAACAATCTACTAGCA-1	0.0171047	0.00143697	0.00106412	0.00579457	0.00841386	0.00511165	0.00102349	0.00349169	0.0131728	0.0153959	0.0287062	0.0191877	0.00150121	0.0120494	0.0164956	0.0086996	0.00292173	0.01161	0.0273211	0.0113089	0.000859125	0.00833314	0.00279703	0.0395011	0.0379158	0.0145238	0.317294	0.0148277	0.0104524	0.173144	0.024913	0.0459796	0.0746677	0.0229805
AAACACCAATAACTGC-1	0.0183867	0.00427812	0.0100181	0.00218015	0.0140081	0.0652226	0.0713777	0.0581065	0.0610022	0.0893807	0.00889655	0.0395292	0.0289509	0.0446746	0.0648464	0.00516914	0.0115527	0.0683179	0.057671	0.0209565	0.0180065	0.0238923	0.0151039	0.0187518	0.00679368	0.00858933	0.0108849	0.0105305	0.0200324	0.012411	0.0657089	0.0105398	0.00633826	0.0278911
AAACAGAGCGACTCCT-1	0.0255653	0.00306539	0.0024866	0.000469484	0.508714	0.00239114	0.000407553	0.00143331	0.015481	0.0252079	0.011208	0.0120783	0.00365311	0.0048584	0.0149125	0.0309911	0.0012749	0.0336744	0.00489642	0.000671669	0.00971862	0.0304899	0.00426028	0.00845248	0.00997714	0.00166373	0.0367402	0.00826592	0.0274465	0.0169618	0.0832985	0.0300148	0.0155295	0.0137395
AAACAGCTTTCAGAAG-1	0.00536414	0.00566909	0.00541592	0.00141496	0.0282937	0.112142	0.250983	0.26548	0.020761	0.0750029	0.000192336	0.0309123	0.00498503	0.00540187	0.00854101	0.0251435	0.000742572	0.0267356	0.00213261	0.000928554	0.00080775	0.0027659	0.00169007	0.020217	0.000854722	0.0301583	0.0300785	0.00113874	0.00526014	0.00689392	0.00520749	0.00804599	0.00365644	0.00698204
AAACAGGGTCTATATT-1	0.0216182	0.00809555	0.0285288	0.00621008	0.0280041	0.0921576	0.0801852	0.125866	0.048735	0.0600569	0.0194372	0.00735877	0.00591737	0.022997	0.0232239	0.0139038	0.0181708	0.0110302	0.00905918	0.0258826	0.00436236	0.0437177	0.00839093	0.012766	0.0161807	0.032025	0.0319854	0.0110179	0.0185815	0.0261603	0.0718388	0.0235823	0.0243779	0.0185747
AAACAGTGTTCCTGGG-1	0.00454921	0.00232683	0.00281774	0.00227623	0.0107937	0.0335204	0.0180642	0.0211598	0.0444649	0.0324393	0.0184465	0.0281095	0.0189854	0.0117054	0.0324421	0.00480752	0.00925048	0.0267905	0.0456219	0.00834316	0.0214764	0.008924	0.0078479	0.0366889	0.028045	0.00669055	0.191051	0.0163344	0.0119765	0.129573	0.0281909	0.0261404	0.0517507	0.058396
AAACATTTCCCGGATT-1	0.0106702	0.00474612	0.00260771	0.00128973	0.013002	0.0747096	0.100507	0.0998459	0.0989682	0.0354305	0.00644648	0.055743	0.00662132	0.0209102	0.0296408	0.00299011	0.00357251	0.0170236	0.0117258	0.004046	0.017799	0.0151071	0.0100224	0.0396315	0.011757	0.0133608	0.105409	0.018263	0.0177101	0.0771957	0.0146447	0.0140966	0.0168992	0.0276069
AAACCCGAACGAAATC-1	0.000945385	0.00469815	0.01877	0.00279993	0.0201165	0.115517	0.0187661	0.0697186	0.178198	0.00816984	0.0312576	0.00335499	0.022326	0.0246952	0.0239238	0.00333488	0.0229389	0.0133072	0.0597363	0.0439274	0.0167214	0.0379514	0.0263693	0.00164297	0.022921	0.0047353	0.00173568	0.0196506	0.0504132	0.00673809	0.0659171	0.00991214	0.0142352	0.0345554
AAACCGGGTAGGTACC-1	0.00411102	0.00238446	0.00299828	0.00079153	0.00951614	0.111693	0.0368068	0.068869	0.0831857	0.0240787	0.00435019	0.020605	0.0108788	0.0228618	0.11521	0.00585089	0.0110372	0.0582574	0.087008	0.031338	0.0270397	0.0265675	0.0124108	0.0157238	0.0106442	0.0052899	0.0348311	0.0107059	0.0168901	0.0332622	0.0220777	0.00906948	0.0169281	0.0467268
AAACCGTTCGTCCAGG-1	0.00282973	0.00620544	0.0120202	0.00174406	0.0128997	0.107891	0.120381	0.121196	0.068937	0.0367704	0.00208466	0.00944978	0.0160006	0.0213034	0.0603461	0.00429167	0.0135764	0.0441809	0.0739253	0.0338554	0.0128677	0.0351565	0.0155442	0.0085859	0.00812807	0.0162067	0.0054989	0.0118962	0.0301772	0.00533786	0.03087	0.00870186	0.00732261	0.033817
AAACCTAAGCAGCCGG-1	0.0318603	0.00998602	0.0226941	0.00806077	0.0167405	0.0764013	0.154302	0.141523	0.0240608	0.0700414	0.00678556	0.0237618	0.0148423	0.00749315	0.031291	0.0422757	0.00485478	0.038586	0.00983627	0.00665654	0.00396689	0.00853993	0.00321411	0.0148777	0.00539357	0.0550041	0.0462439	0.00562446	0.0168924	0.0303096	0.0188005	0.0187016	0.0106176	0.0197606
AAACCTCATGAAGTTG-1	0.0475656	0.00740558	0.0173732	0.00301639	0.0113838	0.083868	0.177293	0.18115	0.0260145	0.0543713	0.00199693	0.0506884	0.00636734	0.00120103	0.0271479	0.0377345	0.00175891	0.0483019	0.00392725	0.000899506	0.00491989	0.00211043	0.00219117	0.0195279	0.00341934	0.0308675	0.0690846	0.00333941	0.00693669	0.0275846	0.00517608	0.00745277	0.00886371	0.0190609
AAACGAAGAACATACC-1	0.0444255	0.0199411	0.0523133	0.0089165	0.0203757	0.0995845	0.135564	0.18065	0.0289298	0.0533224	0.0045919	0.00939287	0.00478288	0.00589454	0.0140792	0.0612251	0.00440074	0.0277461	0.00256993	0.0128516	0.00191316	0.0107412	0.00375706	0.0104176	0.00368316	0.0617512	0.00689636	0.00335895	0.0152605	0.00308057	0.0474738	0.0172394	0.00472224	0.0181476
AAACGAAGATGGAGTA-1	0.0187034	0.00728505	0.00690186	0.00332814	0.025438	0.0737305	0.168596	0.149321	0.0143755	0.0974043	0.00701358	0.0262035	0.00890639	0.005222	0.0100284	0.0267545	0.00276771	0.0257367	0.00472863	0.00183801	0.00459803	0.00603443	0.00357796	0.0358919	0.00866331	0.0363586	0.0828116	0.00592053	0.00903344	0.0468704	0.0156033	0.0225434	0.023529	0.0142808
AAACGAGACGGTTGAT-1	0.00797678	0.00779508	0.0630233	0.00999668	0.03016	0.123838	0.0845161	0.155682	0.0457281	0.0170381	0.00772326	0.00362162	0.0096018	0.00888011	0.0250037	0.0178223	0.046914	0.0190054	0.00535726	0.0427702	0.00538361	0.0311385	0.00929521	0.00382944	0.00801796	0.0318891	0.00230069	0.00913771	0.0300831	0.00169339	0.0839385	0.0150485	0.0116554	0.0241342
AAACGGGCGTACGGGT-1	0.0504798	0.0086776	0.0200191	0.0121587	0.013309	0.0445206	0.100724	0.0695554	0.0458971	0.0961273	0.0178993	0.0329109	0.0128199	0.00410068	0.0196642	0.0683061	0.00236848	0.0459311	0.00660676	0.00383561	0.00984161	0.00526174	0.00425717	0.026512	0.00911108	0.0316711	0.0722978	0.0062239	0.00997696	0.0398139	0.0355762	0.0200642	0.0134728	0.0400075
AAACGGGTTGGTATCC-1	0.278282	0.0441846	0.0736806	0.0282625	0.0011609	0.00533356	0.00131022	0.00259215	0.0169418	0.00738767	0.00269231	0.10889	0.00141986	0.00283994	0.0128512	0.0903447	0.00185206	0.071037	0.00403668	0.000312505	0.00097691	0.00606748	0.00313424	0.0176749	0.00481728	0.0685712	0.0515663	0.00245426	0.00322697	0.0289163	0.0210006	0.0112295	0.0107772	0.0141741
AAACGGTTGCGAACTG-1	0.00105183	0.00577822	0.00874129	0.00354596	0.0121452	0.083104	0.121406	0.0923837	0.0393345	0.0489411	0.00836918	0.0438026	0.0368427	0.0236622	0.0603083	0.00892456	0.0103469	0.0494211	0.0297065	0.0347995	0.0561805	0.0150021	0.0137088	0.027312	0.00649834	0.0187593	0.00877179	0.0132216	0.023203	0.00590999	0.0147852	0.0177119	0.00594331	0.0503773
AAACGTGTTCGCCCTA-1	0.0227261	0.0136583	0.00559317	0.00437367	0.0152899	0.0556836	0.181003	0.101061	0.0460107	0.0716533	0.00992919	0.0894912	0.0232099	0.00263058	0.0507975	0.0279002	0.00567641	0.0448212	0.00132994	0.0133093	0.0208314	0.0020203	0.0134962	0.0397831	0.00181898	0.0152449	0.036514	0.00443833	0.00519883	0.0226633	0.00774102	0.00828798	0.00375268	0.0320605
AAACTAACGTGGCGAC-1	0.0186419	0.0180942	0.0391765	0.00686065	0.0222044	0.125024	0.132256	0.227956	0.014458	0.0532824	0.00234212	0.00546568	0.00262347	0.0146521	0.0122175	0.0567298	0.011446	0.0216229	0.00210182	0.00899979	0.00105377	0.0282802	0.00371757	0.0098621	0.00313217	0.0514573	0.00678831	0.002613	0.0109098	0.00177818	0.049993	0.0186016	0.00446622	0.0111916
AAACTCGGTTCGCAAT-1	0.00108772	0.0102849	0.0566144	0.0040998	0.0381239	0.125453	0.0646987	0.114176	0.0541714	0.0149744	0.0108218	0.00179663	0.00782447	0.0146511	0.0745904	0.00175092	0.0350184	0.021173	0.0137191	0.0421306	0.00914613	0.0393173	0.0113513	0.00267026	0.0130714	0.0159939	0.00173069	0.0127156	0.0294936	0.00248483	0.0725026	0.0225148	0.0195071	0.0403401
AAACTCGTGATATAAG-1	0.0266727	0.00250315	0.00670068	0.00461395	0.00700382	0.0169559	0.0203547	0.00820142	0.0422699	0.0790696	0.0154831	0.0458155	0.0241295	0.0237035	0.0410741	0.0106215	0.00823897	0.0477463	0.0208852	0.00659133	0.00762627	0.0519412	0.0166477	0.0288596	0.0198241	0.00948633	0.116518	0.014018	0.020716	0.0968117	0.0456459	0.0289465	0.0422103	0.0421133
AAACTGCTGGCTCCAA-1	0.20513	0.0676014	0.194188	0.0565773	0.00420117	0.0343032	0.00246561	0.0160265	0.0400908	0.00282788	0.00186863	0.0358062	0.00381362	0.00484255	0.0271045	0.058993	0.00785372	0.0478766	0.00839864	0.0178543	0.00255786	0.0455634	0.00333714	0.000507813	0.00216027	0.0436025	0.000103415	0.00145978	0.00873786	0.000200999	0.0378224	0.00389924	0.00157865	0.0106454
AAACTTAATTGCACGC-1	0.210854	0.035412	0.129991	0.0204681	0.00464164	0.0479382	0.00756791	0.0301445	0.0804078	0.0100567	0.00105878	0.0170928	0.00534876	0.00526433	0.00556054	0.149519	0.00964403	0.0586959	0.00634493	0.00817688	0.00209499	0.0120553	0.00243849	0.000734736	0.00326204	0.0448509	0.000440298	0.00271044	0.0123533	0.000991576	0.0536057	0.00341915	0.00231387	0.0145415
AAACTTGCAAACGTAT-1	0.0177406	0.00726525	0.00893114	0.00641765	0.01789	0.0647221	0.0232314	0.0538906	0.0774875	0.0642615	0.00881287	0.0226557	0.0211329	0.0324232	0.0458206	0.00140748	0.0166545	0.0462622	0.024008	0.0430766	0.019122	0.0226087	0.00719448	0.0224088	0.0230752	0.00840621	0.070989	0.0149798	0.0204027	0.0452186	0.0600667	0.029426	0.0250781	0.0269321
AAAGACATGAAGTTTA-1	0.0173375	0.00225187	0.00472201	0.00688298	0.00853009	0.0349183	0.121289	0.0335177	0.0277334	0.121167	0.0395483	0.0621292	0.0632281	0.0184767	0.0357501	0.0237365	0.00715872	0.0937122	0.00156915	0.0202229	0.0173226	0.00325913	0.0204478	0.0494811	0.00234378	0.00633311	0.0178895	0.00940317	0.00489858	0.0110647	0.0359153	0.0166825	0.00374664	0.05733
AAAGACCCAAGTCGCG-1	0.0464102	0.00314439	0.00433825	0.00152656	0.0123525	0.074554	0.11629	0.122474	0.0260778	0.103207	0.00282178	0.0225505	0.0174198	0.0197434	0.024553	0.00440225	0.00620197	0.0195209	0.0253039	0.010492	0.0149872	0.0151505	0.00602732	0.0171044	0.0105056	0.0166698	0.0639731	0.00767433	0.0117521	0.057224	0.0530759	0.0152476	0.0194085	0.027816
AAAGACTGGGCGCTTT-1	0.0226286	0.00875591	0.0407826	0.00368018	0.0173416	0.118707	0.0862826	0.124328	0.0965216	0.0557667	0.00776822	0.00374685	0.022037	0.0294522	0.0314542	0.00780599	0.0331026	0.0291202	0.0139371	0.0390075	0.00970874	0.0212051	0.00579564	0.00256018	0.00868993	0.019157	0.00166848	0.00819846	0.0180614	0.00210269	0.0597588	0.00998556	0.00537585	0.0355052
AAAGGCCCTATAATAC-1	0.0116296	0.00416871	0.00331183	0.00334618	0.0128039	0.0154434	0.00355282	0.0101317	0.0129381	0.014625	0.0199239	0.0266153	0.00334309	0.0103006	0.0295327	0.00559641	0.00511882	0.0214479	0.0319226	0.00491046	0.00171245	0.0187735	0.00372282	0.0422183	0.0380559	0.0167102	0.219362	0.02006	0.015172	0.147479	0.0358542	0.0570248	0.109525	0.0236672
AAAGGCTACGGACCAT-1	0.00392177	0.00517263	0.0110038	0.00351018	0.0197657	0.0942706	0.139054	0.126863	0.0673562	0.0597425	0.00337901	0.00803369	0.0120056	0.0193912	0.0401246	0.0115683	0.0171276	0.0242328	0.00678391	0.0304847	0.00431536	0.0307897	0.00883166	0.012306	0.00913434	0.0384664	0.0174324	0.00867329	0.0271687	0.0115968	0.0501277	0.0297938	0.013296	0.0342759
AAAGGCTCTCGCGCCG-1	0.017796	0.00426196	0.00836616	0.00131119	0.0179204	0.0970803	0.0312811	0.0912543	0.167848	0.0683263	0.00104584	0.00398802	0.00613518	0.0199707	0.0228579	0.00123822	0.0279679	0.0137967	0.018708	0.0312601	0.0336699	0.0396472	0.0123911	0.00345004	0.0190422	0.0143598	0.00419089	0.0148652	0.0392724	0.0109806	0.100467	0.0115839	0.0101545	0.0335111
AAAGGGATGTAGCAAG-1	0.00969841	0.0117276	0.0251558	0.00618366	0.0175048	0.0942469	0.0816583	0.104248	0.054117	0.0342839	0.0160354	0.0112926	0.0228775	0.0488065	0.0384626	0.0216627	0.0443401	0.0358371	0.00620336	0.0320353	0.00822968	0.0326551	0.0104171	0.00839553	0.0112639	0.0201151	0.0183522	0.0105891	0.0335316	0.0182492	0.0575033	0.0177215	0.0140036	0.022595
AAAGGGCAGCTTGAAT-1	0.00281248	0.00760365	0.0164714	0.0104003	0.0214047	0.0967719	0.173593	0.18131	0.0142663	0.0466558	0.00432869	0.0135367	0.00643452	0.0111519	0.015266	0.0264756	0.00547546	0.0274905	0.00255408	0.0119168	0.00237825	0.0116183	0.00572699	0.0233447	0.00915335	0.0447671	0.0495534	0.00595107	0.0208123	0.0272942	0.0361788	0.0260643	0.0205903	0.0206478
AAAGGTAAGCTGTACC-1	0.00975199	0.00489426	0.0127194	0.00358143	0.0174934	0.0910627	0.204997	0.181609	0.0127656	0.118954	0.00062063	0.0292074	0.00425719	0.00443195	0.012404	0.0519625	0.00275646	0.0257514	0.00109278	0.00629354	0.000917624	0.0101536	0.00262381	0.0126248	0.00172037	0.0696237	0.0155953	0.00262304	0.017351	0.0071604	0.0321067	0.0129596	0.00324133	0.0146923
AAAGTAGCATTGCTCA-1	0.00660903	0.00915059	0.0170104	0.00390207	0.0330236	0.099995	0.0520717	0.0964248	0.112019	0.0225628	0.00338607	0.00651562	0.0181831	0.0217506	0.0699192	0.00186566	0.0189351	0.0395376	0.0415133	0.0509853	0.0272562	0.0422694	0.0137706	0.00668459	0.0163372	0.00943542	0.00840417	0.0143126	0.0344441	0.0115299	0.0495063	0.0107371	0.0128504	0.0171017
AAAGTCACTGATGTAA-1	0.0225559	0.008954	0.0267134	0.00499114	0.0138659	0.0608776	0.0992784	0.0628896	0.0194317	0.0642561	0.0159617	0.0313276	0.0321643	0.0471795	0.0548966	0.0308622	0.0220244	0.0603065	0.00878111	0.0142881	0.0102832	0.018275	0.0123779	0.0253881	0.0096961	0.0294918	0.0298091	0.00823398	0.0108833	0.0193259	0.0487366	0.0216547	0.0158789	0.0383599
AAAGTCGACCCTCAGT-1	0.00347147	0.0035293	0.00364933	0.0019475	0.0145368	0.078847	0.232415	0.135289	0.0262523	0.0716896	0.00175374	0.0566897	0.0148313	0.00789755	0.0408716	0.0376423	0.00207278	0.0682925	0.00134137	0.0050712	0.00937782	0.00155392	0.00469045	0.0280175	0.00215319	0.0252627	0.0482822	0.00306321	0.00540873	0.0165996	0.00300531	0.0102346	0.00526607	0.028994
AAAGTGTGATTTATCT-1	0.00644793	0.00631217	0.0465698	0.00386956	0.0697989	0.033335	0.0067292	0.0218951	0.0542715	0.0197335	0.0717057	0.0152827	0.0581525	0.0211839	0.057049	0.0137913	0.0156034	0.00954634	0.0110939	0.0270131	0.019423	0.0724496	0.0146633	0.00564144	0.021908	0.0102511	0.0260628	0.0148439	0.0405314	0.0206854	0.0943966	0.0428399	0.0275221	0.0193969
AAAGTTGACTCCCGTA-1	0.00274144	0.00605625	0.0136982	0.0106444	0.045739	0.0491528	0.00908254	0.0338788	0.0396728	0.0231096	0.0366747	0.0129131	0.0277359	0.0283253	0.0179616	0.00488518	0.0203903	0.0115726	0.0167168	0.0116613	0.00391353	0.0571541	0.00970115	0.0242823	0.0296267	0.0120093	0.110237	0.0206885	0.0388177	0.0780906	0.0846052	0.0397969	0.0501439	0.0183206
AAATAACCATACGGGA-1	0.0289932	0.000184534	0.000325007	0.000267607	0.325419	0.00161671	0.000188876	0.000912498	0.0239203	0.010461	0.0221287	0.00502351	0.000760878	0.0218468	0.0153437	0.0206548	0.00221179	0.010316	0.0229781	0.00148399	0.0142408	0.0325936	0.00381064	0.0134703	0.0217158	0.00255202	0.0774262	0.0128424	0.0244791	0.06561	0.109226	0.0448763	0.0446202	0.0174995
AAATAAGGTAGTGCCC-1	0.0210335	0.00395434	0.00990165	0.00619601	0.027125	0.0544404	0.0480997	0.0453677	0.0216389	0.0324669	0.0852491	0.0152978	0.0161287	0.0120127	0.0261048	0.0136414	0.0232178	0.0171203	0.0171212	0.0104308	0.00528463	0.0320921	0.012248	0.0278782	0.0249383	0.0218084	0.0899609	0.0145242	0.0212978	0.0598103	0.0720653	0.0358976	0.0423948	0.0332509
AAATACCTATAAGCAT-1	0.0152524	0.0141249	0.0534289	0.00675021	0.0168233	0.0596193	0.00897316	0.0371208	0.119838	0.0103905	0.0070316	0.00132629	0.00725015	0.0369013	0.114016	0.0092344	0.0308899	0.0233343	0.015186	0.0414658	0.020886	0.0691047	0.0100293	0.000775816	0.0105361	0.0268821	0.000304036	0.0102506	0.0392031	0.00144869	0.0770732	0.0514857	0.0111294	0.0419342
AAATAGCTTAGACTTT-1	0.00812327	0.00446013	0.0162279	0.0117692	0.0192711	0.0223338	0.00377854	0.0149696	0.0181829	0.0113432	0.0286892	0.0116715	0.00144239	0.00711078	0.0304247	0.00463329	0.00988321	0.0233409	0.0236792	0.0100261	0.00123306	0.0201722	0.00305052	0.0282534	0.0335264	0.0131315	0.228306	0.0162986	0.0169264	0.164217	0.0574471	0.0449699	0.071497	0.0196098
AAATAGGGTGCTATTG-1	0.00889712	0.0114984	0.0191407	0.00220352	0.0226248	0.125927	0.0173815	0.0848145	0.139709	0.0301762	0.00316901	0.00488927	0.0248805	0.0153321	0.0445115	0.00288075	0.0305549	0.0125916	0.102655	0.0553592	0.0254898	0.0323571	0.0100974	0.00250434	0.0151395	0.00403793	0.00188177	0.0136244	0.0200421	0.00553183	0.0578787	0.007465	0.0131341	0.0316196
AAATCCGATACACGCC-1	0.0349489	0.0110656	0.0279843	0.00893985	0.0153199	0.0795585	0.174014	0.147081	0.0281339	0.0612379	0.00220416	0.0217327	0.00638899	0.00367653	0.0323811	0.0427031	0.00388461	0.0362903	0.00514839	0.00651402	0.00286529	0.00861194	0.00672583	0.017964	0.00529833	0.0339098	0.038769	0.00491657	0.0144976	0.0239675	0.0298929	0.0161708	0.012898	0.0343047
AAATCGCGGAAGGAGT-1	0.0131541	0.00364285	0.00333319	0.00136293	0.0142122	0.0725595	0.214966	0.184687	0.0134437	0.0920051	0.00182355	0.0633756	0.00605669	0.00593506	0.0117971	0.0225645	0.000819652	0.0254959	0.00226907	0.000762758	0.000440936	0.00299002	0.00272963	0.040675	0.00328999	0.0279344	0.0734316	0.00370978	0.00745184	0.031906	0.0124519	0.0135182	0.01341	0.0117944
AAATCGTGTACCACAA-1	0.0160782	0.00809041	0.0177539	0.00567449	0.0137472	0.0781016	0.0142299	0.0670867	0.0948705	0.0481294	0.0170286	0.00563311	0.0165603	0.0562673	0.0527539	0.00141713	0.0213614	0.0145879	0.0159588	0.0399926	0.00837386	0.0401418	0.0131955	0.00908208	0.0186854	0.0103165	0.0516406	0.0160231	0.031085	0.0385479	0.0750889	0.0229905	0.0257238	0.0337819
AAATCTAGCCCTGCTA-1	0.0115001	0.00829377	0.0439432	0.00904361	0.0100829	0.0851286	0.0640296	0.0559982	0.0327677	0.0315999	0.0219162	0.0268138	0.032221	0.0228328	0.124365	0.0560145	0.0203329	0.0649363	0.0114944	0.0384941	0.0170062	0.0187982	0.0148883	0.0150922	0.00753374	0.0164065	0.00281529	0.0130765	0.0302012	0.00250763	0.0410426	0.00770658	0.00471128	0.0364052
AAATGACTGATCAAAC-1	0.0259289	0.0112004	0.027505	0.00551902	0.0172828	0.0710758	0.0910511	0.0861061	0.0467131	0.0784092	0.0050854	0.0138317	0.017979	0.0372609	0.0439381	0.00870906	0.0115559	0.0473035	0.0139104	0.0250003	0.00422863	0.034999	0.00552732	0.0104883	0.00974413	0.0340478	0.0295437	0.00849882	0.0130696	0.0215724	0.0668718	0.015569	0.025612	0.0348615
AAATGATTCGATCAGC-1	0.0846811	0.00137962	0.00310998	0.000691418	0.00795037	0.0336142	0.0241141	0.0239738	0.0874851	0.217251	0.0022898	0.0397381	0.012427	0.0119829	0.0307604	0.00719	0.0155168	0.0231005	0.00937723	0.0197128	0.00512743	0.0130826	0.00850139	0.0238252	0.0150152	0.00420694	0.0511355	0.0151943	0.0127628	0.0439941	0.0917815	0.00971007	0.0190709	0.0302457
AAATGCTCGTTACGTT-1	0.017376	0.0054803	0.00594365	0.00501723	0.0142315	0.0511907	0.0437978	0.0672801	0.0280222	0.0469398	0.0166579	0.0207475	0.0111455	0.012957	0.0156169	0.0113642	0.0109158	0.0315681	0.043931	0.00746651	0.0052174	0.0094538	0.00560478	0.0277943	0.0240022	0.0238098	0.133249	0.0128611	0.0157536	0.0879258	0.0348745	0.0548461	0.0610243	0.0359339
AAATGGCATGTCTTGT-1	0.0365104	0.01931	0.0586478	0.00895398	0.0443498	0.0832377	0.143582	0.156217	0.0191541	0.0583105	0.00623093	0.0121514	0.00363546	0.00800185	0.011398	0.0755321	0.00346423	0.0325304	0.00176806	0.00649399	0.0019796	0.0133866	0.00264776	0.0080866	0.00305743	0.0665622	0.005505	0.00204814	0.0126072	0.00203598	0.0593359	0.0182036	0.00460271	0.0104612
AAATGGCCCGTGCCCT-1	0.00244983	0.00845421	0.0312639	0.0088855	0.0134852	0.0822937	0.015877	0.0601385	0.0955744	0.0192071	0.0148039	0.00845189	0.0407352	0.0168023	0.072538	0.00185707	0.0315536	0.0146832	0.020297	0.031241	0.00650303	0.0575788	0.0213417	0.00780403	0.0257252	0.0100032	0.0167314	0.0211204	0.0394983	0.0144115	0.0993093	0.0209659	0.0418251	0.0265896
AAATGGTCAATGTGCC-1	0.0239447	0.00264681	0.00544867	0.00208285	0.0112813	0.069083	0.169916	0.123564	0.0490211	0.0728278	0.00359513	0.0327376	0.00980935	0.00367359	0.018375	0.016976	0.00265169	0.0408734	0.00780076	0.00247327	0.00302033	0.0129173	0.00510629	0.0288035	0.00983388	0.0234962	0.0925936	0.00741765	0.0152747	0.0495938	0.0127471	0.0150851	0.015101	0.0402277
AAATGTGGGTGCTCCT-1	0.0220901	0.00689859	0.00721226	0.0162133	0.00737913	0.00898757	0.00707007	0.00636533	0.0161133	0.0335073	0.0195836	0.0446292	0.00382541	0.00678228	0.0487417	0.0133963	0.00344367	0.0383348	0.0249125	0.00389542	0.00246159	0.0132045	0.00321169	0.0406617	0.024552	0.0114155	0.231859	0.0180197	0.0121649	0.162355	0.0211949	0.0284169	0.0628406	0.0282606
AAATTACACGACTCTG-1	0.0129405	0.000433965	0.000141212	0.00102802	0.197355	0.00133051	0.000180641	0.0007207	0.0213736	0.0110139	0.0233152	0.0105638	0.000599992	0.00280154	0.0176204	0.00676439	0.00188817	0.00986005	0.0153853	0.00102653	0.00615703	0.0195428	0.00344947	0.0271465	0.0241233	0.00535803	0.242297	0.0143138	0.0123303	0.149694	0.0560443	0.040909	0.0493411	0.0129494
AAATTACCTATCGATG-1	0.0126229	0.012699	0.0373575	0.0216526	0.0157465	0.0504863	0.00617184	0.0421046	0.0217542	0.0168261	0.015973	0.0117253	0.00569455	0.0118944	0.0321447	0.0151033	0.0215224	0.0181068	0.0288143	0.0193921	0.0025534	0.0421431	0.00460171	0.0164224	0.0324995	0.028544	0.11994	0.0158432	0.0232693	0.105608	0.0623769	0.0378364	0.0649941	0.0255754
AAATTCCAGGTCCAAA-1	0.00933571	0.0106142	0.0315782	0.00410296	0.0242791	0.102262	0.121635	0.131391	0.0412188	0.0432275	0.00452581	0.00745689	0.011232	0.0239394	0.0427514	0.00640605	0.0280306	0.014646	0.0149287	0.026596	0.01574	0.0319163	0.00584976	0.0115929	0.0136113	0.0374062	0.0197612	0.00948491	0.0243747	0.0101574	0.0545841	0.0183809	0.0170691	0.0299142
AAATTGATAGTCCTTT-1	0.0044397	0.00488368	0.00959178	0.000553851	0.0110115	0.151462	0.0176851	0.103392	0.217334	0.0100307	0.000983117	0.0010251	0.00459144	0.0175224	0.0555473	0.000114061	0.0237322	0.0078802	0.0623411	0.0443194	0.0176124	0.019798	0.00914844	0.00179679	0.0221257	0.00591658	0.00199658	0.0179188	0.0416998	0.00975138	0.0510826	0.0130793	0.00714832	0.0324836
AAATTGCGGCGGTTCT-1	0.0239146	0.00392693	0.00663078	0.00219524	0.00772917	0.0447509	0.124054	0.0469554	0.0207153	0.0747916	0.0123152	0.0718249	0.0300029	0.00871771	0.0768545	0.0363456	0.0090017	0.0735214	0.00267158	0.0133533	0.015471	0.00516052	0.0153612	0.0558352	0.00523995	0.0171239	0.0502531	0.00890079	0.010138	0.035049	0.0277001	0.0108181	0.0116074	0.0410693
AAATTTACCGAAATCC-1	0.0695222	0.000568016	0.000844288	0.000476661	0.00687727	0.00746283	0.00476879	0.00419399	0.056233	0.200887	0.00527398	0.0551562	0.0109394	0.0125528	0.0729601	0.00518745	0.00536677	0.0396726	0.0265975	0.00637271	0.00868417	0.0151557	0.0118343	0.0303822	0.0124913	0.00240504	0.0846318	0.0166894	0.00619306	0.0735036	0.0844704	0.0171645	0.0160233	0.0284576
AAATTTGCGGGTGTGG-1	0.00410193	0.00209577	0.00205126	0.00253418	0.0125787	0.0374736	0.0302147	0.0346503	0.0794741	0.0217658	0.00662561	0.0268499	0.00434906	0.0146364	0.038995	0.00546535	0.00725863	0.0414841	0.0443554	0.00615531	0.00361843	0.0168647	0.00648755	0.0323539	0.02129	0.010153	0.166574	0.0174564	0.0204793	0.136092	0.0352127	0.0282522	0.0525312	0.0295199
AACAACTGGTAGTTGC-1	0.0176653	0.00577546	0.00855722	0.00143782	0.0145621	0.0866764	0.183951	0.134928	0.0796512	0.0566702	0.00975061	0.0120228	0.0128864	0.00724049	0.0699923	0.0194492	0.00725882	0.037345	0.00293611	0.0235641	0.0118334	0.0162204	0.0135211	0.0126982	0.00372794	0.0232951	0.00969623	0.00747677	0.0282438	0.00965339	0.0319797	0.00501441	0.00485814	0.0294611
AACAATACATTGTCGA-1	0.00628153	0.00410973	0.00874362	0.00963569	0.0308442	0.0373494	0.0109945	0.0279045	0.0417651	0.0222574	0.0431785	0.0196442	0.0164749	0.0115763	0.0190349	0.00483807	0.00759985	0.0338022	0.0318901	0.00753161	0.0109382	0.0297072	0.0115066	0.0398835	0.0371151	0.020022	0.134266	0.0144188	0.0274842	0.0841055	0.0449396	0.0432753	0.083101	0.0237805
AACAATTACTCTACGC-1	0.00158727	0.00670469	0.0266558	0.00346988	0.0180274	0.0884899	0.011644	0.061523	0.0802962	0.0159278	0.0408225	0.00482042	0.0494545	0.05422	0.0519097	0.00107827	0.04524	0.0107961	0.0261403	0.0194824	0.00901853	0.0469628	0.0143497	0.00348565	0.0289858	0.00767358	0.00546513	0.0319144	0.0642393	0.00931385	0.08686	0.0162563	0.0183527	0.038832
AACACACGCTCGCCGC-1	0.015564	0.00561227	0.0112614	0.00464824	0.0195203	0.0601123	0.00886712	0.0479327	0.0868973	0.0184674	0.0111439	0.0200882	0.014695	0.0246175	0.0413932	0.00351989	0.0157069	0.00682573	0.0390799	0.0168018	0.015959	0.0835576	0.0110531	0.0145291	0.0260581	0.00674801	0.090435	0.0187516	0.0289348	0.0732712	0.0710353	0.0211881	0.0312837	0.0344403
AACACGACTGTACTGA-1	0.0359056	0.00641252	0.0161099	0.00375551	0.0153438	0.0874901	0.242864	0.164628	0.0192265	0.089181	0.00166777	0.0242477	0.00835525	0.00852489	0.0202347	0.0474778	0.00229017	0.0294392	0.00196162	0.00291787	0.00937465	0.00429225	0.00399335	0.0209534	0.00157851	0.0399412	0.0150214	0.00237534	0.00867063	0.00577023	0.0293304	0.0128687	0.00357742	0.0142183
AACACGAGACGCGGCC-1	0.0036291	0.00380646	0.0144818	0.00358378	0.0181403	0.0819709	0.0708684	0.0805237	0.0555775	0.0459479	0.016663	0.0201959	0.0376201	0.0484637	0.0483003	0.00774877	0.0375881	0.0500665	0.0239295	0.0252286	0.0142044	0.040038	0.0167782	0.0147233	0.0129659	0.00968145	0.00973356	0.0129953	0.0349148	0.00968094	0.0619796	0.0209885	0.00959562	0.0373862
AACACGCGGCCGCGAA-1	0.0103606	0.00273124	0.00105536	0.00875096	0.00967627	0.0050673	0.000888686	0.0031095	0.0127859	0.0173644	0.0149104	0.0148319	0.000766887	0.00754312	0.0102458	0.00475469	0.00677104	0.0107235	0.0319968	0.003843	0.00244795	0.00924344	0.00267623	0.0335862	0.0381136	0.012329	0.305648	0.0151263	0.0094468	0.217467	0.0347794	0.0457738	0.0747645	0.0204204
AACAGCTGTGTGGCAA-1	0.0024227	0.00669385	0.0191476	0.00358218	0.024001	0.113396	0.105772	0.116386	0.035395	0.0258673	0.00343414	0.0222504	0.053006	0.031968	0.0637362	0.00940009	0.0194013	0.0432191	0.00679385	0.0436251	0.0130507	0.0274668	0.00899998	0.0103701	0.00627422	0.0137688	0.0035702	0.00985253	0.0290776	0.00308805	0.0651838	0.0139946	0.00765457	0.0381494
AACAGGAAATCGAATA-1	0.0355927	0.0151868	0.0840617	0.0136997	0.0679437	0.0686351	0.0951202	0.124426	0.0171107	0.0531523	0.00149146	0.0111795	0.00371302	0.0115813	0.0108241	0.0782637	0.00571071	0.0373803	0.00100837	0.00714058	0.00241365	0.0349007	0.00242672	0.00431582	0.00314385	0.108734	0.00262659	0.00217211	0.011385	0.000912992	0.046814	0.0215909	0.00341543	0.0119264
AACAGGATGGGCCGCG-1	0.00151873	0.00677542	0.0191221	0.00378743	0.042858	0.0803109	0.118752	0.139726	0.0224233	0.0388736	0.0117787	0.00988433	0.00828337	0.0179061	0.016897	0.0341286	0.00665432	0.022978	0.0036694	0.00785326	0.00279761	0.0270412	0.00472873	0.0172694	0.0182444	0.0723444	0.0552343	0.00828226	0.0248954	0.0318806	0.0352966	0.0429075	0.0233652	0.0215315
AACAGGTAGTATGGAT-1	0.0061462	0.0101282	0.0242678	0.00218894	0.0117936	0.124338	0.0143226	0.0588073	0.163867	0.0176835	0.0165746	0.000870518	0.0120046	0.0242521	0.0558009	0.000817827	0.0215538	0.0238284	0.0669572	0.064778	0.0338274	0.0784267	0.00830619	0.000945163	0.0109579	0.00733513	0.000455178	0.00909352	0.0240574	0.00218036	0.0610286	0.00703443	0.00752771	0.0278429
AACATAGCGTGTATCG-1	0.146409	0.0319436	0.122133	0.0287016	0.00571167	0.0473696	0.0438604	0.0562412	0.0358199	0.0535752	0.00309092	0.0269073	0.00145357	0.00494802	0.0197731	0.0986379	0.00615019	0.0394107	0.00137197	0.0032192	0.000960973	0.00917643	0.00544068	0.00838304	0.00407039	0.0982754	0.00711621	0.00343017	0.00970885	0.00401644	0.0429592	0.00912767	0.00413048	0.016476
AACATATCAACTGGTG-1	0.00879094	0.0125685	0.0207226	0.00580719	0.0233851	0.0754542	0.156431	0.114282	0.0181707	0.0575232	0.0272759	0.0317002	0.0441425	0.0122736	0.0281386	0.0355718	0.0165276	0.0338551	0.00155179	0.0146172	0.00888951	0.0180284	0.00938061	0.0234828	0.00611496	0.0308552	0.0178877	0.00790895	0.0146297	0.0105834	0.0443836	0.0147869	0.00722881	0.0470502
AACATCGATACGTCTA-1	0.121799	0.0330555	0.201213	0.0371971	0.00330251	0.0111872	0.0025268	0.00718154	0.0277289	0.0833148	0.00545537	0.0422627	0.00448325	0.00426561	0.0189717	0.106937	0.00493178	0.0632849	0.00358627	0.00150524	0.00153433	0.0110858	0.00488701	0.00532603	0.0027116	0.116686	0.00340951	0.00210041	0.00542877	0.00455853	0.0373253	0.00989803	0.00246105	0.0083958
AACATTGAAGTTGATC-1	0.00777015	0.00195573	0.00113661	0.00336135	0.0253353	0.00940467	0.00196561	0.00698551	0.0134466	0.0183599	0.0211053	0.0172652	0.0013906	0.00687941	0.0138633	0.00803426	0.00370252	0.0285145	0.0193093	0.00324811	0.00187812	0.0155809	0.00410856	0.0478004	0.0391994	0.0156024	0.238329	0.0234334	0.015544	0.168951	0.0282606	0.0714742	0.101402	0.0154026
AACATTGTGACTCGAG-1	0.0209676	0.00499481	0.0131002	0.00176912	0.0110709	0.0629566	0.0375746	0.0430822	0.0611959	0.0787693	0.00227842	0.0118375	0.0157693	0.0750964	0.0807443	0.00274015	0.00789671	0.0292805	0.00894276	0.014871	0.00940915	0.0405095	0.00696519	0.0197909	0.0181885	0.00606928	0.0829977	0.0108945	0.0173675	0.0717108	0.0510908	0.0126652	0.0330672	0.0343353
AACCAAGACTTCTCTG-1	0.0516671	0.00196336	0.00308166	0.000926159	0.00944976	0.0627739	0.158231	0.128832	0.0269977	0.0770314	0.0083909	0.0394881	0.00325835	0.00395868	0.0418053	0.00883524	0.000924826	0.0111797	0.00970878	0.000663592	0.00262532	0.00146126	0.00142869	0.0266231	0.00685897	0.0163061	0.15435	0.00444661	0.00445277	0.0581513	0.0047466	0.00843137	0.0166436	0.0443073
AACCAGTATCACTCTT-1	0.0415695	0.00558602	0.0156225	0.00411411	0.016609	0.0594637	0.0843894	0.0830213	0.0599404	0.0813217	0.0108577	0.0294895	0.0122536	0.0158164	0.0485887	0.0210401	0.00569764	0.0456088	0.0109731	0.00951136	0.00463616	0.0101861	0.00640621	0.0185224	0.0112238	0.0222094	0.0794784	0.00952274	0.0151765	0.0582883	0.0350644	0.0162348	0.0194968	0.0320795
AACCATAGGGTTGAAC-1	0.126929	0.0410735	0.215218	0.0369785	0.000723937	0.0099415	0.0015823	0.00565342	0.0402226	0.00402476	0.000956523	0.0550295	0.00203287	0.00119443	0.00160791	0.154945	0.00347383	0.102882	0.00142035	0.00123265	0.00232352	0.00362072	0.0022028	0.00244011	0.0021598	0.137567	0.00146634	0.000853159	0.00450273	0.000825395	0.0233238	0.00634869	0.00151877	0.00372523
AACCATGGGATCGCTA-1	0.00551664	0.00966771	0.0171686	0.00464692	0.0209502	0.081336	0.115621	0.12604	0.0176847	0.0435016	0.00762267	0.0286895	0.0125207	0.0211068	0.0289639	0.0187585	0.0148288	0.0294737	0.00826232	0.0104651	0.00899604	0.0209637	0.00640694	0.0228736	0.0124348	0.0395861	0.0666694	0.00900618	0.0191441	0.0442896	0.0347698	0.0258288	0.0422993	0.0239059
AACCCAGAGACGGAGA-1	0.0232707	0.00140778	0.00207581	0.00148779	0.00871963	0.0142431	0.0024936	0.008269	0.0363168	0.0602671	0.0223007	0.0106955	0.00727989	0.018506	0.013483	0.00601351	0.0117434	0.00948211	0.042459	0.014379	0.0108979	0.019682	0.00554903	0.034077	0.0399068	0.0103275	0.197915	0.0240868	0.0175974	0.134845	0.0589463	0.044548	0.0575543	0.0291729
AACCCATCCCATGATC-1	0.00187061	0.00637385	0.0127104	0.0104643	0.0131599	0.0791718	0.0752396	0.0957094	0.037827	0.0388587	0.0121748	0.0307723	0.0259365	0.0487007	0.0829339	0.00975332	0.0106345	0.0313898	0.0256817	0.0120883	0.00886007	0.0320378	0.00978665	0.0200412	0.0112133	0.0144505	0.045945	0.00849231	0.0203064	0.0359554	0.0410438	0.0226888	0.0180515	0.0496759
AACCCGACAACCCGTG-1	0.015385	0.00452066	0.0227234	0.00407202	0.0175725	0.062525	0.064738	0.0475352	0.0519992	0.0472185	0.0123337	0.0239543	0.0629408	0.0583317	0.0411157	0.00444355	0.018547	0.0352848	0.0193458	0.0252337	0.0157093	0.0258764	0.0167154	0.0259381	0.017779	0.00597475	0.0479387	0.0152284	0.0209893	0.0389375	0.0429752	0.0267477	0.0241441	0.0352259
AACCCGCTGTATTCCA-1	0.0113095	0.00947552	0.0233482	0.0060361	0.0210167	0.0730448	0.127629	0.101646	0.031386	0.0539053	0.021117	0.0182057	0.0222598	0.0197668	0.0297216	0.0197429	0.0141061	0.0219118	0.00690198	0.0243259	0.0111853	0.0241354	0.00612104	0.012665	0.0112892	0.0282475	0.0381331	0.00861765	0.0197425	0.0274698	0.0633002	0.0348299	0.0241849	0.0332217
AACCCTACTGTCAATA-1	0.0151307	0.00821787	0.0176048	0.0128127	0.0134667	0.0152828	0.00282306	0.0111848	0.0233875	0.0176083	0.0308136	0.0169559	0.00576498	0.00532303	0.0128511	0.00694404	0.0107564	0.0126684	0.0138516	0.0123749	0.00245223	0.0282088	0.00425411	0.0418972	0.041966	0.0192787	0.208799	0.0208763	0.0188517	0.147233	0.0486407	0.0582233	0.0757237	0.0177723
AACCCTGGTGGAACCA-1	0.0542771	0.00115277	0.00186244	0.00102645	0.0120875	0.0383484	0.0700396	0.043167	0.0490174	0.175859	0.0124028	0.0688369	0.0227034	0.0125533	0.035795	0.0152219	0.00580542	0.0491425	0.00597023	0.00659517	0.00796904	0.00682379	0.00960905	0.0454845	0.00865674	0.00739195	0.0533555	0.0107581	0.00585674	0.0346249	0.0649294	0.017595	0.0138239	0.0312576
AACCGAGCTTGGTCAT-1	0.0194815	0.00683364	0.0261275	0.00258938	0.0301126	0.0821413	0.014253	0.0707366	0.102542	0.039363	0.00996005	0.00490915	0.00781969	0.0185732	0.0535584	0.00281777	0.0254048	0.00986468	0.0557557	0.0297499	0.0209714	0.0328614	0.0104083	0.00889302	0.0209483	0.00967954	0.06646	0.0131401	0.0215434	0.0478291	0.0519855	0.0197203	0.0237871	0.0391793
AACCGCTAAGGGATGC-1	0.0223591	0.00588318	0.0167427	0.00465075	0.0527864	0.0796239	0.102076	0.125837	0.0388047	0.0507314	0.00999462	0.0141698	0.0214905	0.0268624	0.0445638	0.0259249	0.0289508	0.0353091	0.00652402	0.0255264	0.0228069	0.0389565	0.00556295	0.0110679	0.00925695	0.0194196	0.0108096	0.00781923	0.0182028	0.00673671	0.0734102	0.0130607	0.0101449	0.0139336
AACCGTTGTGTTTGCT-1	0.0823168	0.0271798	0.0748325	0.016486	0.0127144	0.0716044	0.110495	0.112934	0.0144401	0.0593506	0.00562155	0.0168862	0.00842466	0.00729691	0.0108088	0.0467943	0.00728233	0.0301034	0.00293691	0.0126662	0.00140159	0.0181265	0.00368454	0.00907503	0.00566754	0.0965756	0.00957302	0.00293234	0.0123907	0.00431565	0.0586656	0.0225224	0.00655516	0.0173399
AACCTAAAGCCGTCCG-1	0.0911349	0.0309343	0.197563	0.0484723	0.00378001	0.0211857	0.0224175	0.0285785	0.0520098	0.0662594	0.00149627	0.0549599	0.00299577	0.00314415	0.00951809	0.0969944	0.00164135	0.0552474	0.00332851	0.000787668	0.000654507	0.00314274	0.00286157	0.0110043	0.00383121	0.0960377	0.0190394	0.00214949	0.00513825	0.0105521	0.0254769	0.0127803	0.0044366	0.0104457
AACCTCGCTTTAGCCC-1	0.152115	0.0599629	0.14606	0.0220258	0.00653334	0.0353548	0.00379681	0.0238343	0.0295357	0.00335785	0.00330122	0.0109426	0.00163019	0.00879546	0.0207163	0.0858111	0.0127671	0.0606321	0.00838729	0.0120613	0.00635543	0.0402402	0.0118217	0.00290344	0.00834474	0.0839016	0.00403034	0.00521732	0.0231862	0.00291023	0.0621272	0.00880152	0.00733032	0.0252083
AACCTGTCACGGAATT-1	0.00500884	0.0164848	0.0108494	0.00317682	0.0190983	0.0878891	0.115175	0.120571	0.039099	0.0315141	0.00992632	0.0250323	0.00958971	0.0084238	0.0457126	0.00508468	0.00657842	0.025713	0.0145065	0.00620285	0.00301834	0.0265043	0.00694529	0.0177774	0.0153917	0.0208234	0.0923043	0.0144705	0.032079	0.0574943	0.0384137	0.01536	0.0279758	0.0258057
AACCTTTAAATACGGT-1	0.00298037	0.0108726	0.0193165	0.00205966	0.0102024	0.121899	0.0421554	0.0805902	0.0912722	0.0282491	0.012525	0.0109633	0.0402832	0.0266745	0.0681261	0.00721903	0.0262556	0.0242831	0.044484	0.0325008	0.0340127	0.0306288	0.0160345	0.00751129	0.0167765	0.00885428	0.00499421	0.0191432	0.0258585	0.010875	0.0493589	0.0118181	0.013458	0.0477641
AACCTTTACGACGTCT-1	0.00517191	0.000283665	0.000655555	0.000366745	0.334232	0.00241736	0.000396866	0.00145114	0.0275277	0.0053144	0.0335803	0.0285981	0.00219383	0.00936282	0.0240255	0.00914339	0.00471253	0.0400083	0.00711877	0.00136488	0.0166022	0.0575332	0.0167018	0.00806968	0.0176316	0.00115953	0.0206428	0.0520426	0.0348811	0.0215505	0.103199	0.0610771	0.0172542	0.0337291
AACGAAAGTCGTCCCA-1	0.011257	0.00427156	0.00685067	0.00303114	0.0131324	0.0784118	0.189737	0.124181	0.0162376	0.0874591	0.00314261	0.0528191	0.0345419	0.0146874	0.0377415	0.0213516	0.00495282	0.0359408	0.00272216	0.00547389	0.0128334	0.00572523	0.0204334	0.0353167	0.0039841	0.0231701	0.0480454	0.00575204	0.00902645	0.0223162	0.0162525	0.0133882	0.00820863	0.0276038
AACGATAATGCCGTAG-1	0.00525292	0.0250271	0.0309263	0.00141108	0.0218888	0.115787	0.0185307	0.092299	0.0960914	0.0277575	0.00502959	0.00185279	0.0214726	0.0215582	0.0563046	0.00304578	0.0534075	0.0230867	0.069167	0.0211446	0.019293	0.0468855	0.0112316	0.00169987	0.0101369	0.00483052	0.000742321	0.016614	0.0355082	0.00323266	0.0881031	0.00697744	0.0074387	0.0362654
AACGATAGAAGGGCCG-1	0.041923	0.00617351	0.00384977	0.000990021	0.0086565	0.0518822	0.0239422	0.0370739	0.131933	0.11515	0.00201474	0.0430126	0.0257858	0.0464136	0.0310173	0.00470562	0.0202803	0.015015	0.0545082	0.0129552	0.0162437	0.0288745	0.00930322	0.00915702	0.0125679	0.00292587	0.0339085	0.0136482	0.0166864	0.0410603	0.088286	0.00693445	0.0112009	0.0319203
AACGATATGTCAACTG-1	0.0383439	0.00446884	0.00755478	0.000458384	0.0302651	0.0849129	0.0183372	0.0587618	0.220461	0.084443	0.0054034	0.0195958	0.00484864	0.0287815	0.0348695	0.00677558	0.00835084	0.0156002	0.0413848	0.0286916	0.0133685	0.0226893	0.00881573	0.00443969	0.0124352	0.00511104	0.0100019	0.0136172	0.0270448	0.0235726	0.0719736	0.00740699	0.00753552	0.0296789
AACGCGAACGGCAACA-1	0.303342	0.0300064	0.0902141	0.0215753	0.00217164	0.00979764	0.00218364	0.00589229	0.0113765	0.00850211	0.00259847	0.0618775	0.00194412	0.0010767	0.0229927	0.0715962	0.00243062	0.0414344	0.0138371	0.000465978	0.000490851	0.00704562	0.00424843	0.021641	0.00780968	0.055005	0.0713092	0.00455848	0.00777188	0.038634	0.0218583	0.0166657	0.0155791	0.022068
AACGCGACCTTGGGCG-1	0.0161652	0.00314315	0.00856339	0.000926068	0.0145416	0.0819581	0.0401173	0.0770234	0.143754	0.0444011	0.00605352	0.0109287	0.0299719	0.0161935	0.0427165	0.00493848	0.00856849	0.0170587	0.0597948	0.0119388	0.0238501	0.019273	0.00656077	0.0128343	0.0184254	0.00983711	0.060474	0.0114025	0.0219562	0.0430974	0.0505994	0.0158513	0.0218112	0.0452709
AACGCGGTCTCCAGCC-1	0.00699411	0.00480506	0.0134748	0.00521295	0.0311293	0.048236	0.0154044	0.0429624	0.0554422	0.0442314	0.0237196	0.0133712	0.00479043	0.0340148	0.0132143	0.00244467	0.0137023	0.0395942	0.0161732	0.0143376	0.00304169	0.0332546	0.0063943	0.0213836	0.0337735	0.0234662	0.141622	0.0153582	0.0269911	0.0879635	0.0434302	0.0421224	0.0490819	0.0288614
AACGCTGTTGCTGAAA-1	0.0311408	0.0046341	0.00996857	0.00282135	0.0173566	0.0599559	0.0230893	0.039811	0.0428066	0.0665884	0.0119491	0.0282826	0.0250347	0.0174271	0.0502838	0.00383755	0.0117962	0.0205465	0.0272538	0.010482	0.0130476	0.0583833	0.0112027	0.0231681	0.0177833	0.00788295	0.0935801	0.0231719	0.0235958	0.0674218	0.060031	0.023768	0.0338267	0.0380709
AACGGACGTACGTATA-1	0.0165261	0.00480994	0.0174829	0.00331177	0.0347431	0.0894927	0.0150765	0.0721871	0.090541	0.0417939	0.00720678	0.0094644	0.0142631	0.0155624	0.0694942	0.00144966	0.0270549	0.0167131	0.0206574	0.0190012	0.00665522	0.0339078	0.0121694	0.0127794	0.017539	0.0111337	0.0569591	0.0169	0.0536831	0.0451018	0.0702263	0.0167709	0.0235233	0.0358191
AACGGCCATCTCCGGT-1	0.00305916	0.00594188	0.0155313	0.00234994	0.00974777	0.0870946	0.0359538	0.0484529	0.0670639	0.0283926	0.00652098	0.0171045	0.0143066	0.0315997	0.0937468	0.00338088	0.0258909	0.0612279	0.0624882	0.0638957	0.0298256	0.0280954	0.0122506	0.0185537	0.0194684	0.00602052	0.0304639	0.0228889	0.0240861	0.0296821	0.0315143	0.0138161	0.0150915	0.0344928
AACGTACTGTGGGTAC-1	0.00834351	0.00796389	0.0147026	0.00225689	0.0105808	0.0855564	0.0234892	0.0632681	0.10484	0.0393821	0.0062787	0.00527412	0.02606	0.0822902	0.0355229	0.00132747	0.0227527	0.0286425	0.0388352	0.0164717	0.0173427	0.0593831	0.0150678	0.00842682	0.0187286	0.0103372	0.0359774	0.0190817	0.0267236	0.0293292	0.0665661	0.0126192	0.0221989	0.0343787
AACGTAGTCTACCCAT-1	0.0238938	0.00180354	0.00117507	0.00531747	0.0197658	0.00471683	0.00175326	0.00357697	0.0177408	0.0164818	0.0326475	0.0247899	0.00171485	0.0126497	0.0217855	0.0102997	0.00281516	0.0146046	0.0304221	0.00212119	0.000659579	0.0130489	0.00244516	0.0507046	0.0408726	0.0138296	0.257931	0.0136853	0.00951588	0.158851	0.0205249	0.0554685	0.0916649	0.0207222
AACGTCAGACTAGTGG-1	0.012027	0.00788252	0.0269451	0.0123748	0.0216826	0.106958	0.130039	0.150478	0.0434147	0.0491695	0.00235751	0.00722097	0.0227676	0.00883206	0.0417431	0.0197093	0.0232331	0.0284021	0.00779016	0.0240998	0.00719923	0.0324994	0.00855344	0.00758619	0.00797947	0.0388431	0.00495351	0.00793742	0.0273609	0.00351962	0.0516023	0.0152878	0.00990366	0.0296478
AACGTCATCCGGCTTG-1	0.0111835	0.00391964	0.00528991	0.00300313	0.0163141	0.0327443	0.0416997	0.0470586	0.0564384	0.0242668	0.0330781	0.0242537	0.00310442	0.0144099	0.0162215	0.00594898	0.00452361	0.0522764	0.0245796	0.00592325	0.00720034	0.0177502	0.00351825	0.0304333	0.0222628	0.0114404	0.190047	0.0116776	0.0143181	0.11991	0.0358915	0.0344264	0.0489666	0.0259199
AACGTGATGAAGGACA-1	0.055695	0.00500663	0.0156831	0.00283413	0.0548789	0.0471686	0.0343393	0.0415872	0.0724753	0.15002	0.00948785	0.0246615	0.0085769	0.0192121	0.0208156	0.00456918	0.0134701	0.0154771	0.0381327	0.0269046	0.00459052	0.0338149	0.0070884	0.0127232	0.011027	0.00669098	0.0340373	0.0114486	0.0194342	0.0335144	0.0915317	0.0176612	0.0121367	0.0433051
AACGTGCGAAAGTCTC-1	0.0224511	0.00207445	0.00557494	0.00297279	0.0269546	0.0731249	0.145139	0.103758	0.0855732	0.0848453	0.00969971	0.0314875	0.0176221	0.0107337	0.0535454	0.0148036	0.00699487	0.0482939	0.00887207	0.016338	0.0273308	0.00749122	0.00503572	0.0196222	0.0052366	0.0160494	0.0280558	0.0058062	0.00802769	0.014717	0.029691	0.0119351	0.00665476	0.0434874
AACTACCCGTTTGTCA-1	0.014793	0.00488902	0.0278563	0.0016495	0.0138109	0.126745	0.0121545	0.0697099	0.200223	0.0263781	0.00914922	0.00100716	0.0137079	0.0345442	0.0434364	0.00185017	0.0227019	0.0106887	0.062928	0.0449369	0.0198679	0.0479711	0.0163296	0.00102067	0.00767923	0.00235075	0.000462618	0.0111624	0.0190977	0.00211358	0.0832388	0.00382113	0.00791031	0.0338146
AACTAGCGTATCGCAC-1	0.0141709	0.00215882	0.00449075	0.00839622	0.0413821	0.00817886	0.00209294	0.00608127	0.0125813	0.00857756	0.0287086	0.0133231	0.00417782	0.00421524	0.0115686	0.00714995	0.00537654	0.0222433	0.012977	0.00605244	0.00164366	0.0140067	0.00331946	0.0426392	0.042122	0.0211411	0.275123	0.0180877	0.0109827	0.159893	0.0306799	0.0586679	0.082095	0.015696
AACTAGGCTTGGGTGT-1	0.00918188	0.0119961	0.0247406	0.00513183	0.0192212	0.145184	0.0245627	0.0884026	0.105261	0.0188603	0.00369147	0.00153532	0.0189664	0.0216527	0.0622918	0.000927645	0.0502107	0.0301233	0.0521775	0.0371386	0.0285657	0.0294299	0.0130647	0.0018939	0.0113604	0.00785514	0.000875203	0.0184145	0.0289253	0.00400855	0.0603311	0.0115872	0.00948309	0.0429476
AACTCAAGTTAATTGC-1	0.0131071	0.00955448	0.0314899	0.00962494	0.0206393	0.0951896	0.153924	0.13667	0.0454542	0.0380798	0.00332496	0.0163424	0.0094277	0.0154429	0.0575874	0.0382186	0.0117792	0.0635298	0.00355981	0.0251224	0.00623194	0.00867026	0.00969609	0.0190253	0.00558921	0.025266	0.00818321	0.00669622	0.0128346	0.00391198	0.0362005	0.0122618	0.00600686	0.0413579
AACTCCAGAGCGTGTT-1	0.00312657	0.00150073	0.00434789	0.00860336	0.00616503	0.0507409	0.109186	0.0292571	0.0389106	0.0979032	0.0218866	0.0553009	0.0257295	0.0147153	0.101829	0.0454244	0.0132762	0.0901667	0.00411783	0.0284045	0.0388119	0.00519402	0.0157756	0.0432708	0.00329273	0.0036375	0.0205466	0.00963264	0.00673482	0.016457	0.0240187	0.0136039	0.0060329	0.0423979
AACTCCTAATCCCATG-1	0.181983	0.0211957	0.0496857	0.00836138	0.318746	0.00250551	0.000333803	0.00146552	0.0163258	0.002562	0.0042757	0.0235405	0.00189621	0.00147519	0.023952	0.0828647	0.00575531	0.0401111	0.00628601	0.000813672	0.00626288	0.0255212	0.00352015	0.00137109	0.00464419	0.0261899	0.000311944	0.00338779	0.0131273	0.000335036	0.0790593	0.0172062	0.00265869	0.0222688
AACTCGATGGCGCAGT-1	0.0251223	0.00219404	0.00164516	0.0079061	0.0103228	0.00893845	0.00341618	0.00568688	0.0214516	0.0255501	0.0344691	0.0336731	0.00771107	0.012586	0.00841023	0.00661289	0.00271555	0.0215913	0.0211517	0.00360475	0.00290209	0.0114664	0.00313797	0.0478	0.0300135	0.0136596	0.219589	0.0178978	0.0182119	0.156591	0.0513241	0.0467007	0.0938094	0.0221376
AACTCTCAATAGAGCG-1	0.0191879	0.00331121	0.00933531	0.00454444	0.0106771	0.0122564	0.00209344	0.00734614	0.0146485	0.0305415	0.02119	0.00877688	0.0021935	0.0112986	0.0195222	0.0075958	0.00770995	0.0243006	0.0109751	0.00648489	0.000558925	0.0327802	0.00411424	0.0412909	0.0337058	0.0266157	0.21029	0.0174049	0.0142499	0.162693	0.0422287	0.0801977	0.0774389	0.0224417
AACTCTCAGTGTGCTC-1	0.000689806	0.00743301	0.0145502	0.00134132	0.0207378	0.145924	0.0184647	0.120209	0.0883505	0.00679559	0.0011458	0.00123	0.0289034	0.0321358	0.0502164	0.00183585	0.0248029	0.0276562	0.0858229	0.0474436	0.0333199	0.0483567	0.0110704	0.00137465	0.01224	0.00712	0.000965497	0.0134662	0.037227	0.00279105	0.0529132	0.00892611	0.00755336	0.0369873
AACTGAGGTCAGCGTC-1	0.0870374	0.0214484	0.123269	0.0104455	0.0106481	0.0314492	0.0426492	0.0552283	0.0163398	0.115568	0.000924894	0.0252333	0.00811739	0.00376478	0.0082236	0.0630426	0.00332369	0.0493206	0.00154585	0.00192597	0.000939442	0.012964	0.00206513	0.00284675	0.00161896	0.205137	0.00142097	0.000924939	0.00475014	0.000921222	0.0643117	0.0152366	0.00154538	0.0058125
AACTGATATTAGGCCT-1	0.0123125	0.0131066	0.0240223	0.00687488	0.0648314	0.0868349	0.168464	0.180018	0.0205342	0.0759919	0.00894554	0.00836111	0.00466496	0.00730844	0.0178086	0.051592	0.0068539	0.0250639	0.00196662	0.0187809	0.00210108	0.0287858	0.00448662	0.00940705	0.00414032	0.0279883	0.00723303	0.00421541	0.0219806	0.00321286	0.0492063	0.014437	0.00428476	0.0141844
AACTGGGTCCCGACGT-1	0.0250889	0.0219806	0.0843819	0.0104717	0.186446	0.0684403	0.0636722	0.122582	0.0152636	0.0370175	0.00372166	0.00673683	0.00645534	0.0123677	0.012228	0.0529503	0.00943693	0.035988	0.00130346	0.0044684	0.00213717	0.0228654	0.00199063	0.00378982	0.00466711	0.0644848	0.00288259	0.00307815	0.0128271	0.00131747	0.0589923	0.0206561	0.00480361	0.0145063
AACTGGGTTCGAGCCG-1	0.017097	0.00872629	0.0322287	0.00416389	0.0614125	0.067162	0.0959607	0.11648	0.0293281	0.161561	0.0115429	0.0170138	0.00954467	0.0172548	0.0170115	0.0437973	0.00602191	0.0363975	0.00207132	0.0217387	0.00267943	0.0135409	0.00371091	0.00756043	0.00507625	0.0218303	0.0052661	0.00465034	0.0200065	0.00405213	0.0950077	0.0188767	0.00453454	0.0166932
AACTGGTGTGGGCCTT-1	0.0119827	0.00189059	0.00282032	0.00910623	0.0148965	0.0118792	0.00320629	0.00812443	0.017657	0.0198687	0.0116929	0.0172583	0.00276886	0.00597275	0.0175796	0.0034416	0.00617619	0.022947	0.023087	0.00868352	0.00823893	0.0130333	0.00388142	0.0379517	0.0397127	0.0160949	0.283849	0.018474	0.0101077	0.183743	0.0295029	0.0384819	0.079437	0.0164508
AACTTCTGCGTCTATC-1	0.0251295	0.0104976	0.0156564	0.00416225	0.0198441	0.0993162	0.211499	0.18071	0.0120271	0.0541229	0.00268927	0.0348486	0.00846711	0.00708844	0.0117143	0.0255645	0.00287714	0.0365675	0.00232055	0.00500425	0.000919116	0.00900512	0.00584506	0.0167175	0.0027372	0.0661619	0.0187299	0.00417225	0.0208895	0.00898294	0.0341722	0.0179509	0.00621726	0.0173919
AACTTGCCCGTATGCA-1	0.000697818	0.00515414	0.0170961	0.00290243	0.0237512	0.115023	0.036465	0.0744971	0.0843549	0.0214095	0.0142128	0.00631082	0.0414199	0.0379109	0.063914	0.00575438	0.0214906	0.0432339	0.0444233	0.0282722	0.0355509	0.0308106	0.0177862	0.0071617	0.0137134	0.00813157	0.00187341	0.0137991	0.0264946	0.00350239	0.0692717	0.0162159	0.0117352	0.0556595
AACTTGCGTTCTCGCG-1	0.0261298	0.00964453	0.0277834	0.00494624	0.0104268	0.0844821	0.13363	0.136998	0.0198258	0.0801818	0.00535317	0.0210066	0.0105501	0.00662751	0.00709405	0.0268578	0.00676863	0.0310451	0.0101681	0.00503918	0.00700119	0.00897553	0.00391011	0.0224528	0.00873146	0.0470377	0.062981	0.00571665	0.00907252	0.0308742	0.060997	0.024375	0.0228263	0.0204901
AACTTTAGCTGCTGAG-1	0.00525579	0.00424811	0.00535802	0.00896937	0.0245245	0.0101247	0.00284312	0.00868357	0.0159014	0.0122414	0.0213996	0.00973806	0.00153531	0.0139031	0.00871785	0.00588464	0.00536637	0.0111638	0.0119076	0.00898964	0.00380807	0.0145805	0.00263657	0.0333605	0.0440645	0.0213168	0.264996	0.0164994	0.0139771	0.181902	0.0294255	0.053605	0.105015	0.0180567
AAGAAGGATCAGTTAG-1	0.0257398	0.00395728	0.0096175	0.00703291	0.0112957	0.0477112	0.0615588	0.0288882	0.0315783	0.0379456	0.0244159	0.0701016	0.0359615	0.0177679	0.0555802	0.00886433	0.0138268	0.0483758	0.0138319	0.0234479	0.0209924	0.0208726	0.0138205	0.0527697	0.0172186	0.0111614	0.0905803	0.0172578	0.0103964	0.0555035	0.0272798	0.0202574	0.0345476	0.0298427
AAGACATACGTGGTTT-1	0.0165229	0.0039405	0.00814454	0.00120667	0.0109598	0.0727959	0.168608	0.100539	0.0499003	0.0568559	0.00886867	0.0449838	0.0211276	0.00697916	0.0568533	0.00543778	0.00673041	0.0180913	0.00833158	0.00894914	0.027218	0.00822803	0.0103001	0.0228974	0.00736328	0.0145893	0.0654445	0.00841129	0.0122877	0.0416251	0.0279945	0.0133964	0.0174961	0.0469222
AAGACCAAATAACTCA-1	0.00206632	0.00124637	0.00850051	0.00172244	0.0107458	0.0641389	0.0831418	0.03656	0.0497091	0.0603322	0.0135469	0.043355	0.0603737	0.0191153	0.0599862	0.0142431	0.0095067	0.123391	0.00893701	0.0078931	0.0205582	0.0117644	0.0114364	0.044486	0.0120693	0.00470777	0.0381348	0.0137025	0.0142578	0.0227013	0.060956	0.0191447	0.0174941	0.0300754
AAGACCCAACTGAACA-1	0.00840807	0.0031248	0.0071065	0.000844994	0.00936038	0.0886397	0.0691659	0.0752011	0.0838189	0.0549926	0.00279142	0.0243631	0.0155552	0.019925	0.0640751	0.00667713	0.0149948	0.0551923	0.0753334	0.0370721	0.0224242	0.0153291	0.0101873	0.0246163	0.0122834	0.00816192	0.0408948	0.0144323	0.0195718	0.0241512	0.0327109	0.0100269	0.0137003	0.0348671
AAGACTAACCCGTTGT-1	0.0153154	0.00428913	0.00420966	0.00362103	0.0119127	0.00895681	0.00204128	0.00596726	0.0227242	0.0214032	0.0287541	0.0289648	0.00799959	0.00994018	0.0154361	0.0104517	0.00355213	0.0434355	0.0191967	0.00372784	0.00450908	0.0253717	0.00354886	0.0346375	0.0359834	0.0156973	0.205895	0.0193429	0.0153161	0.153329	0.0479673	0.0623911	0.0839803	0.020131
AAGACTCACGCCCACT-1	0.0321762	0.00540822	0.0187418	0.00413149	0.0188994	0.0421173	0.0727215	0.0310291	0.0670598	0.0925005	0.0153793	0.0477511	0.0346116	0.0117871	0.0459089	0.0155659	0.00710037	0.0807835	0.0148085	0.0149777	0.0212303	0.0124002	0.00944805	0.0303973	0.0089094	0.0109237	0.0394468	0.0107935	0.0136589	0.0176211	0.0552504	0.0406221	0.0146269	0.041212
AAGACTGCAAGCTACT-1	0.022161	0.00747642	0.0118494	0.00188859	0.0184189	0.112366	0.143001	0.153358	0.111009	0.0549813	0.00472754	0.00778865	0.00599898	0.0075785	0.0294237	0.0172237	0.00909726	0.0132954	0.00842723	0.0159915	0.013593	0.0233258	0.0116842	0.00828851	0.00613427	0.0210722	0.0106717	0.00817395	0.0209342	0.00874798	0.045314	0.0121148	0.00734911	0.0465339
AAGAGATGAATCGGTA-1	0.0208517	0.00579898	0.00639012	0.00216799	0.0241901	0.0596868	0.139724	0.0906914	0.0366295	0.0728155	0.01182	0.051353	0.0278381	0.0188517	0.0344313	0.0111751	0.00720354	0.035791	0.00947027	0.00740232	0.0191973	0.0175554	0.00868874	0.029826	0.00728587	0.0174947	0.0714372	0.00861895	0.0111864	0.0443361	0.0243249	0.0182793	0.0205162	0.0269701
AAGAGCTCTTTATCGG-1	0.0027597	0.00871045	0.0226504	0.00364083	0.027136	0.101699	0.143612	0.182848	0.0229864	0.0424533	0.000985698	0.00515962	0.00486717	0.0204756	0.0129072	0.0228994	0.00688088	0.0455034	0.0031562	0.0308931	0.00241761	0.0149587	0.00340111	0.00895731	0.00546917	0.087311	0.00745198	0.00698134	0.0254646	0.00533793	0.0688707	0.0289555	0.00848673	0.0137117
AAGAGGATGTACGCGA-1	0.0159825	0.00432382	0.00369649	0.00160356	0.0133014	0.0782794	0.175308	0.141613	0.0328846	0.0581341	0.00306854	0.0390544	0.0192726	0.0113983	0.0343474	0.0224658	0.00218699	0.0325507	0.017083	0.00234909	0.0118823	0.00272039	0.00411912	0.0348855	0.00595514	0.019587	0.0943389	0.00563137	0.00995921	0.0361769	0.00920144	0.00847614	0.0097025	0.0384597
AAGAGGCATGGATCGC-1	0.00885427	0.00933762	0.0273481	0.00477206	0.0289391	0.115303	0.156042	0.19263	0.0309864	0.0677601	0.00617571	0.00434324	0.0115489	0.00948544	0.0211335	0.01705	0.0101198	0.0172947	0.00388267	0.0255774	0.00862698	0.0365998	0.00430692	0.00503997	0.00358227	0.035161	0.00370739	0.00326085	0.0190954	0.00202146	0.0661946	0.0144063	0.00526039	0.0241534
AAGAGGCCCTTTGGAA-1	0.018646	0.00402323	0.00778845	0.00376696	0.0124927	0.0633128	0.133129	0.0789212	0.0483075	0.0584304	0.0193144	0.0268159	0.0185116	0.00586461	0.0715008	0.0175634	0.0156228	0.047932	0.00630739	0.0106145	0.0176038	0.010373	0.0123649	0.0321173	0.0083108	0.0244712	0.0607185	0.0102885	0.0115727	0.0355029	0.0233211	0.0137584	0.0175321	0.0531993
AAGATGGCACCGGACC-1	0.0790396	0.0144602	0.0584024	0.0112398	0.0179073	0.083753	0.130787	0.149651	0.0286794	0.0516191	0.00467092	0.0183987	0.00814469	0.00570568	0.0131082	0.0665289	0.00573584	0.034869	0.00552407	0.00975935	0.00385323	0.0125152	0.00690727	0.0102905	0.00375161	0.0624352	0.00878814	0.00325082	0.0165921	0.00409047	0.0422757	0.00727225	0.00571511	0.0142784
AAGATTGGCGGAACGT-1	0.0310489	0.00352684	0.00706233	0.00710908	0.0144469	0.0282908	0.0146971	0.0231718	0.0261541	0.0440122	0.016842	0.0236286	0.0101477	0.00694899	0.0289145	0.00467759	0.0085587	0.0209223	0.0254868	0.00870414	0.00261129	0.0300913	0.00638669	0.0337812	0.025487	0.01201	0.1941	0.0153596	0.0137071	0.135283	0.058521	0.0384415	0.0531237	0.0267451
AAGCACCCTGCGTATC-1	0.015522	0.00688544	0.0249119	0.00264996	0.0386398	0.111176	0.0265291	0.0737867	0.0524907	0.0233274	0.00360965	0.00150617	0.0228298	0.0493247	0.03865	0.00221067	0.0604937	0.0176157	0.00857346	0.0346864	0.0138271	0.0466299	0.010135	0.00393181	0.0224712	0.0164517	0.0069382	0.0144971	0.0341088	0.00806942	0.115148	0.0456306	0.0201329	0.0266093
AAGCATACTCTCCTGA-1	0.00166028	0.00480888	0.0187325	0.00165633	0.0113506	0.0977106	0.0370927	0.0473931	0.128603	0.0343552	0.0128385	0.0191249	0.0611689	0.0277196	0.0629361	0.00391546	0.0419844	0.0191311	0.0510563	0.0376116	0.0476169	0.0314148	0.0226787	0.00869343	0.0132367	0.00436501	0.00196223	0.0150348	0.0255603	0.00499963	0.0434533	0.00703209	0.00838054	0.0447216
AAGCCACTTGCAGGTA-1	0.0429682	0.0060041	0.0223319	0.00573362	0.0109695	0.0464651	0.0537118	0.0646236	0.0369962	0.0947083	0.0222878	0.0207705	0.0127939	0.026036	0.030777	0.0188081	0.00994424	0.0498145	0.00863822	0.0056254	0.00322394	0.020058	0.00443884	0.015762	0.0152317	0.0240685	0.0677765	0.0104732	0.0195329	0.059147	0.0892499	0.0265039	0.0249867	0.029539
AAGCCGAAGCGGTTTA-1	0.00337296	0.00744559	0.00850169	0.00231198	0.0103838	0.0970458	0.137298	0.124354	0.0652694	0.0739044	0.00425207	0.0124459	0.0148181	0.015691	0.0291118	0.0104102	0.0263266	0.0270527	0.0252846	0.0208813	0.00671649	0.0239782	0.0124009	0.016544	0.0104464	0.0183822	0.0438715	0.0106062	0.0239307	0.0283689	0.0357171	0.0139084	0.0132546	0.0257124
AAGCCGCCGTGAAATC-1	0.00527671	0.00554079	0.00238993	0.0142903	0.0149933	0.00933835	0.00158006	0.00593464	0.0142435	0.0121197	0.0219332	0.020575	0.00173807	0.00478239	0.0297821	0.00716507	0.00408653	0.0220584	0.0258581	0.00333751	0.000931634	0.0248136	0.00494529	0.0407166	0.0357019	0.0200423	0.224552	0.0196945	0.0197549	0.164053	0.0278525	0.064371	0.099405	0.0261428
AAGCGCAGGGCTTTGA-1	0.00635229	0.00322697	0.0105725	0.00197547	0.0195712	0.0860838	0.0792233	0.106148	0.0890713	0.0376029	0.0124423	0.0223162	0.016714	0.0165406	0.0293476	0.00348484	0.01586	0.0430369	0.0165389	0.0360026	0.00912789	0.0271144	0.00800076	0.0111982	0.0162436	0.0212822	0.0489124	0.0160429	0.0409686	0.0255866	0.0558235	0.0125098	0.0156318	0.0394458
AAGCGGCGTCATGGGT-1	0.0605714	0.0101693	0.0279073	0.007963	0.0687486	0.054347	0.130502	0.117589	0.028474	0.0838836	0.00105687	0.0422103	0.00231641	0.0036251	0.0122222	0.0734791	0.00101528	0.0454493	0.00238812	0.00146579	0.0014385	0.00490698	0.00235877	0.0209295	0.00408792	0.0406623	0.0593573	0.00271749	0.0067566	0.0252742	0.0202273	0.0129333	0.0093698	0.0135965
AAGCGTCCCTCATCGA-1	0.00748429	0.0102474	0.0205404	0.00287163	0.0113483	0.108075	0.0729923	0.114334	0.124689	0.0465754	0.00236615	0.0107079	0.0104892	0.0292764	0.0538334	0.00405108	0.0234355	0.0137719	0.0287105	0.0239867	0.0134414	0.0221033	0.0121487	0.00826355	0.0118342	0.014259	0.0114309	0.0144614	0.0249903	0.013548	0.0779374	0.0138029	0.01031	0.0316826
AAGCTAGATCGAGTAA-1	0.022307	0.00969077	0.00754497	0.000739198	0.0180445	0.104357	0.0211841	0.0890224	0.25831	0.0400043	0.00373097	0.00484962	0.0168191	0.0171538	0.0418916	0.00264433	0.0128013	0.0038061	0.0592827	0.0268023	0.0322555	0.0152149	0.00510868	0.001952	0.0112324	0.0036659	0.00162556	0.00948311	0.0212506	0.00539439	0.0925436	0.00500159	0.00492978	0.029356
AAGCTCGTGCCAAGTC-1	0.0268372	0.00271171	0.00724894	0.00215642	0.0182861	0.0675362	0.138729	0.111381	0.0652862	0.08452	0.00459015	0.0296958	0.0151611	0.0120941	0.0424849	0.0123969	0.00776552	0.0466585	0.00702597	0.0411101	0.02824	0.00691776	0.00544437	0.0203609	0.00727019	0.0125636	0.0467574	0.00677073	0.0111208	0.023545	0.0265062	0.0163142	0.0141098	0.0304031
AAGCTCTTTCATGGTG-1	0.0118511	0.00660536	0.0209297	0.00930311	0.0113971	0.0541555	0.0171384	0.035188	0.0730065	0.0277206	0.018241	0.0180058	0.00619927	0.0142493	0.105194	0.00268864	0.0190109	0.012517	0.0080843	0.0199087	0.00791036	0.0344253	0.00825709	0.0203463	0.0231566	0.0154005	0.113812	0.0163906	0.0230961	0.0837784	0.0554198	0.0297953	0.0339701	0.0428471
AAGGAGAACTTATAAG-1	0.236169	0.0187443	0.0721893	0.0216432	0.00381091	0.0207466	0.00493588	0.0134291	0.0641264	0.0540189	0.00287525	0.0451961	0.00755971	0.0100928	0.0171794	0.0759593	0.00410793	0.0560303	0.0127437	0.00782513	0.00471904	0.0122621	0.00700912	0.00896196	0.00490149	0.0497558	0.00553973	0.00461539	0.0190114	0.00654205	0.0900358	0.0122744	0.00649407	0.0184945
AAGGAGCGGTTGGTGC-1	0.0114871	0.00289665	0.00439238	0.00208439	0.0116127	0.0785487	0.153726	0.110985	0.0269517	0.0728233	0.0131852	0.0492743	0.0317502	0.00563308	0.0812882	0.0331987	0.00625982	0.0626398	0.00431904	0.0140465	0.0178841	0.00369491	0.0115145	0.0424887	0.0029925	0.0147582	0.0312014	0.00675758	0.00812665	0.0170728	0.0113344	0.00914828	0.00579078	0.0401319
AAGGATCGATCGCTTG-1	0.0522145	0.00278681	0.00565607	0.00166688	0.0175329	0.0789252	0.0242213	0.0557604	0.0932358	0.198154	0.00370624	0.0197282	0.0110154	0.0299405	0.0553436	0.000813063	0.013871	0.0119393	0.0258279	0.0233305	0.0113351	0.0335738	0.00930493	0.0126821	0.0113424	0.00269839	0.00364362	0.0129055	0.0152313	0.00981039	0.101037	0.00714096	0.00509303	0.0385319
AAGGATGAGGGACCTC-1	0.144588	0.0433587	0.0754509	0.02057	0.0442696	0.0655741	0.0143052	0.0669255	0.0397274	0.0087107	0.0103322	0.00578199	0.0120081	0.0134638	0.0395331	0.0483214	0.0320835	0.020949	0.00881282	0.0415507	0.00554882	0.0408815	0.00477983	0.0019763	0.0101528	0.0405231	0.00186378	0.00607876	0.0197565	0.0023986	0.0623667	0.00805641	0.00920151	0.0300987
AAGGCAGGCTGTCTCC-1	0.00690209	0.00382921	0.00988177	0.00157016	0.00993812	0.0783397	0.0703098	0.0842926	0.118143	0.0382721	0.00968744	0.0439483	0.0223792	0.0188311	0.0272709	0.00601946	0.00716063	0.011827	0.0451898	0.0290161	0.0149852	0.0129133	0.00675042	0.0168524	0.0145981	0.0125256	0.0769741	0.0111211	0.0267883	0.0534745	0.0414885	0.018348	0.0192953	0.0310766
AAGGCGCGTAAAGCTT-1	0.00717788	0.00643973	0.0178647	0.00219626	0.0184525	0.124452	0.146239	0.186146	0.0239266	0.0500576	0.00190056	0.0131847	0.0157726	0.0157789	0.0569106	0.0186822	0.0182016	0.0223988	0.00742839	0.0134226	0.00735204	0.0323951	0.00660781	0.0133269	0.00636373	0.0301672	0.0111198	0.00714216	0.0213748	0.0062713	0.0329496	0.0173827	0.00909674	0.0318163
AAGGCTGTGCTCATCG-1	0.0054452	0.00483794	0.00840345	0.00149786	0.0123237	0.100244	0.198634	0.157621	0.070708	0.0437833	0.00936425	0.036678	0.00845952	0.00480539	0.0352239	0.0212491	0.00410469	0.0293019	0.0130375	0.0042772	0.0050439	0.0138868	0.00611148	0.0167519	0.0048623	0.0270287	0.0366874	0.00494154	0.0224871	0.0144628	0.0237298	0.00954158	0.00601119	0.0384529
AAGGGAACGACTGGCT-1	0.182005	0.0247117	0.0531787	0.0204115	0.0026571	0.0178122	0.0032231	0.0103688	0.11685	0.00693298	0.00567783	0.0517809	0.010141	0.00600787	0.0273985	0.0707057	0.00732428	0.0600771	0.0170064	0.00900348	0.00685357	0.023364	0.00480982	0.006171	0.00855917	0.0704386	0.0232948	0.00468586	0.0131815	0.0173386	0.0538916	0.0181166	0.013097	0.0329244
AAGGGACAGATTCTGT-1	0.0135323	0.0104329	0.0167046	0.00452303	0.0204015	0.0148963	0.00267659	0.0111296	0.019933	0.0105614	0.0241187	0.0088044	0.00330502	0.0181563	0.0155016	0.011452	0.016904	0.0252722	0.012684	0.011554	0.00219057	0.029213	0.00374289	0.0271427	0.0422655	0.0330361	0.21204	0.0182369	0.0158187	0.128981	0.0645408	0.0506814	0.0764166	0.0231504
AAGGGACTATGCATTC-1	0.0142337	0.0240199	0.0135187	0.00325	0.0172354	0.112541	0.0278263	0.0765339	0.0832423	0.0503655	0.0131761	0.0102877	0.012328	0.0486918	0.064929	0.00322002	0.0210234	0.0221443	0.0319422	0.0320141	0.010249	0.0349872	0.00995468	0.00587409	0.0136035	0.0100749	0.0222675	0.0146203	0.0279241	0.0256873	0.0757797	0.00998587	0.0172827	0.039186
AAGGTATCCTAATATA-1	0.0120829	0.0105227	0.0205839	0.00633852	0.0315826	0.101906	0.150877	0.150876	0.0228647	0.0666707	0.0138506	0.0119035	0.0160971	0.016827	0.035707	0.034522	0.01566	0.0519522	0.00399902	0.0329956	0.0336852	0.0172673	0.00709088	0.0106708	0.0035789	0.023717	0.0063685	0.00481605	0.0135154	0.00423978	0.0317365	0.0098189	0.00484036	0.020836
AAGGTGATAAACCAGC-1	0.0112886	0.0118794	0.043681	0.00769509	0.0516111	0.0339001	0.0144776	0.021501	0.0266198	0.0319585	0.0394339	0.0610607	0.0554648	0.0139962	0.0396988	0.0201507	0.0155447	0.0217911	0.0058201	0.0333633	0.0124145	0.0674553	0.0144787	0.0189364	0.0217978	0.0177813	0.0513588	0.0136391	0.0456211	0.0370011	0.0482912	0.0387223	0.0310311	0.0205346
AAGTAAGCTTCCAAAC-1	0.0453117	0.00773536	0.0142123	0.0123377	0.0130209	0.0147746	0.0179502	0.019248	0.0169946	0.0387731	0.0153507	0.0381509	0.00202811	0.00630117	0.0106078	0.0333428	0.00201153	0.0209453	0.0246024	0.00287631	0.00106314	0.0106805	0.00414035	0.0433461	0.029488	0.0561494	0.193427	0.0166494	0.0177692	0.115227	0.029155	0.0475942	0.05925	0.0194847
AAGTAGAAGACCGGGT-1	0.00285329	0.0037101	0.0130855	0.0040862	0.0192953	0.0281262	0.00493649	0.024126	0.0650057	0.0130898	0.018248	0.010574	0.00791242	0.0107118	0.0158235	0.00429815	0.0109462	0.0173739	0.0150651	0.0258441	0.00518445	0.056315	0.00722186	0.0206707	0.0321508	0.0134525	0.153967	0.0253328	0.0398395	0.12993	0.078539	0.0349956	0.0567403	0.0305488
AAGTAGTGACGCGAGG-1	0.0248285	0.00212915	0.00208451	0.00145597	0.0109538	0.0239447	0.0619163	0.0436044	0.0272053	0.052735	0.0152361	0.0589062	0.00315938	0.00334122	0.0271075	0.0100372	0.00147722	0.0375802	0.00764575	0.000730002	0.00173194	0.0034646	0.0027476	0.0478717	0.0178051	0.0146118	0.246129	0.0113904	0.00760068	0.135519	0.00663522	0.0240725	0.0465408	0.0178009
AAGTCAATTGTCGTCA-1	0.0159015	0.0109717	0.0216822	0.00265608	0.0170154	0.0875627	0.0671635	0.0923524	0.119724	0.0550368	0.0164368	0.0168121	0.0164086	0.0166281	0.0285538	0.0110673	0.0212042	0.0238587	0.0132133	0.0260542	0.0161749	0.0464536	0.00876746	0.0065215	0.0136416	0.0306867	0.0101668	0.0106496	0.0243515	0.0092057	0.0936875	0.0135054	0.0117622	0.0241225
AAGTGACGACCGAATT-1	0.0167853	0.00212538	0.00125174	0.000627935	0.0106079	0.0419143	0.0727793	0.059215	0.0781164	0.0486472	0.00281116	0.0478187	0.00536537	0.0173369	0.0426	0.00407385	0.00351329	0.0412208	0.033812	0.00251079	0.00358374	0.00973112	0.00432018	0.0323443	0.0150199	0.00950626	0.18036	0.0100597	0.0110371	0.098033	0.0144304	0.0173244	0.0280603	0.033056
AAGTGAGTCGGGTTTA-1	0.00993098	0.00593132	0.0133292	0.00555283	0.0139596	0.0588059	0.0875059	0.0716332	0.0291867	0.040184	0.0109981	0.0426792	0.0429667	0.0747594	0.0447371	0.014237	0.016666	0.0411995	0.00809903	0.0221617	0.0246302	0.0139595	0.00840767	0.0304008	0.0127492	0.0159335	0.0626424	0.0129267	0.0181457	0.0431643	0.0221219	0.0231984	0.0216861	0.0355104
AAGTGCCTTGACTGTA-1	0.0648724	0.0145854	0.0706796	0.00522892	0.0179548	0.101999	0.0499348	0.0956571	0.0603184	0.0743695	0.00557723	0.00883251	0.0114437	0.0178544	0.0328146	0.010727	0.0232858	0.0256292	0.011365	0.0281052	0.0228734	0.0299402	0.00723877	0.00451719	0.00812591	0.0221673	0.00248223	0.0114735	0.0216919	0.00474458	0.0874342	0.0162197	0.00950106	0.020355
AAGTGCGTTAGAATCT-1	0.00290506	0.0209589	0.0204772	0.00473338	0.0217954	0.119022	0.0294866	0.0815591	0.0726961	0.0150367	0.0111764	0.00510584	0.0182055	0.0366569	0.0505949	0.0018487	0.026136	0.0527855	0.0606499	0.0347954	0.0203151	0.0377708	0.0137353	0.00363839	0.0237704	0.0124879	0.00345249	0.0154426	0.0458685	0.00722723	0.0594924	0.0215514	0.0163274	0.032295
AAGTGCTTCTCTATTG-1	0.0139642	0.00443473	0.0167376	0.0138394	0.01053	0.0661529	0.0115638	0.0290268	0.0307408	0.0267245	0.0234396	0.0107408	0.0194552	0.0805126	0.0193074	0.00163316	0.0189889	0.0126113	0.0472784	0.0166039	0.0113439	0.0229545	0.00502253	0.0231432	0.0324057	0.00930689	0.139436	0.0172319	0.0209731	0.0819729	0.0419877	0.0346026	0.0511698	0.034163
AAGTGTTTGGAGACGG-1	0.00236975	0.00393569	0.0124464	0.00116541	0.0235912	0.137252	0.0234639	0.10324	0.182977	0.0135039	0.00389665	0.000416497	0.0133418	0.0355194	0.032275	0.0010222	0.0319028	0.00891781	0.0206339	0.0623178	0.0260659	0.0605364	0.0106914	0.00107292	0.0144637	0.0062022	0.000944812	0.0130486	0.044777	0.00321164	0.0569446	0.00712249	0.0101524	0.0305765
AAGTTCACTCCAAGCT-1	0.0033981	0.00321842	0.0190877	0.00671086	0.0118504	0.0173815	0.00317756	0.0127959	0.0308575	0.0116961	0.04569	0.0157017	0.0056404	0.00999428	0.0331387	0.00519121	0.00806669	0.0196344	0.0231042	0.0136438	0.00502992	0.0250484	0.00741515	0.0388722	0.035399	0.0144446	0.197749	0.0236492	0.0282184	0.135202	0.0505349	0.0418279	0.0780317	0.0185983
AAGTTCAGTCTGCGTA-1	0.00501566	0.011665	0.0411375	0.00886174	0.0574838	0.0951983	0.0661395	0.0897143	0.100121	0.0199517	0.00464696	0.00429725	0.0162402	0.014663	0.0578896	0.011431	0.0184639	0.0348863	0.0144602	0.0368615	0.0187508	0.0498247	0.00972954	0.00269588	0.0133705	0.0107705	0.00229772	0.0157497	0.0279246	0.0043269	0.0661357	0.00947455	0.00845348	0.0513673
AAGTTCGGCCAACAGG-1	0.0143307	0.00375143	0.00430041	0.00328281	0.0107512	0.042293	0.0580172	0.0706588	0.0629408	0.0234125	0.00566732	0.0303487	0.00545938	0.0140454	0.0159413	0.00956345	0.00485189	0.0471082	0.0256997	0.010008	0.00199381	0.0106106	0.00709184	0.0312391	0.0187379	0.0186393	0.186861	0.012586	0.0164342	0.10306	0.0193604	0.0260413	0.0482041	0.0367084
AAGTTGTGATGTTATA-1	0.00302255	0.00395011	0.0190821	0.00497387	0.0164917	0.111547	0.0277259	0.0703607	0.181271	0.0307578	0.00428041	0.0014401	0.00741123	0.0281982	0.0681168	0.0010859	0.0182283	0.0219862	0.0494126	0.0151403	0.0211449	0.0450059	0.0193762	0.00357583	0.0142198	0.00622864	0.00218012	0.0150983	0.0320963	0.00467758	0.060872	0.00799579	0.0144676	0.0685781
AAGTTTACTAATGGCA-1	0.131728	0.043559	0.213906	0.0507774	0.0035909	0.0157949	0.00243744	0.00960104	0.0532369	0.00262565	0.00202008	0.0371191	0.00185266	0.00197837	0.0100516	0.147605	0.00596436	0.0719959	0.00130441	0.00204324	0.00175136	0.0113081	0.00318524	0.0021402	0.003323	0.107515	0.000402211	0.00112246	0.00518251	0.00029555	0.0388501	0.0052191	0.0012754	0.00923764
AAGTTTATGGGCCCAA-1	0.00160991	0.00557873	0.0294976	0.00650512	0.0166587	0.0920078	0.0548981	0.061061	0.0511844	0.0321018	0.0307255	0.0123499	0.0788772	0.0496243	0.0421869	0.0101594	0.0207751	0.0641431	0.0048908	0.058621	0.0157989	0.0553313	0.00963226	0.00703996	0.0117126	0.0116684	0.00217265	0.0105979	0.0308138	0.00307712	0.0488936	0.0136496	0.0127386	0.0434168
AATAACAACGCTCGGC-1	0.0116865	0.000862981	0.0014401	0.00249649	0.00711201	0.0441345	0.0925138	0.0374714	0.018007	0.0646108	0.00540395	0.0689543	0.0446667	0.0114065	0.0328742	0.00698043	0.00811627	0.0955314	0.00909178	0.00916771	0.0170989	0.0045801	0.0109695	0.0525338	0.0115523	0.00622891	0.14039	0.00959263	0.00547408	0.0715565	0.00913227	0.0161244	0.0183156	0.0539219
AATAACACTAGAACAA-1	0.00997812	0.00703204	0.0173258	0.0125558	0.0164227	0.0886736	0.0128103	0.0591443	0.0790257	0.0154637	0.0116944	0.00791963	0.0388398	0.0201025	0.0369589	0.0020595	0.035573	0.0145774	0.0449936	0.0360464	0.0215867	0.0451046	0.0110668	0.0125747	0.0254965	0.00915119	0.0597566	0.0190723	0.0267461	0.0406289	0.0644182	0.0280301	0.0334619	0.035708
AATAAGTCCTCGAGAC-1	0.033546	0.000469767	0.000427059	0.00135322	0.0101439	0.00326161	0.000848586	0.00183049	0.022544	0.110474	0.032151	0.049596	0.00257855	0.0151526	0.0132567	0.00761058	0.00330181	0.0442036	0.0214756	0.00122599	0.00136983	0.0114337	0.00395992	0.0294211	0.0218844	0.0111431	0.181731	0.0110039	0.00707961	0.125063	0.0931933	0.054318	0.055008	0.0179401
AATACAATGTTTCAGG-1	0.020075	0.00188629	0.00381342	0.00155541	0.014324	0.0377941	0.0127012	0.020291	0.103441	0.0412388	0.0224521	0.0285721	0.0201811	0.013027	0.025008	0.00719343	0.0101779	0.0255409	0.0375522	0.0126951	0.0112153	0.0285531	0.0140942	0.0281416	0.027055	0.00920791	0.113425	0.0168502	0.020268	0.0767187	0.0550522	0.040241	0.0669526	0.0327051
AATACCGGAGGGCTGT-1	0.00680434	0.00216766	0.00297664	0.00190279	0.0124249	0.0569173	0.0878539	0.066199	0.0419541	0.0408865	0.0245714	0.068101	0.0363595	0.0102756	0.0451125	0.00741202	0.00674177	0.0585682	0.015503	0.0109263	0.0101114	0.0182148	0.00713274	0.0333367	0.0128441	0.0148929	0.102969	0.014154	0.011882	0.0659454	0.0269222	0.0133963	0.0264939	0.0380461
AATAGAACAGAGTGGC-1	0.00485078	0.00480947	0.013683	0.00366147	0.0242489	0.112559	0.0385628	0.104131	0.101073	0.0385915	0.00442792	0.00300729	0.0137537	0.022032	0.058218	0.00412598	0.0229955	0.0173725	0.0886468	0.043069	0.0213812	0.0364278	0.0126391	0.0052997	0.0161462	0.0106317	0.0083988	0.0142646	0.0389822	0.0117475	0.0536705	0.0121107	0.00978511	0.0246949
AATAGAATCTGTTTCA-1	0.00487825	0.0182535	0.047697	0.0181439	0.0472803	0.114872	0.0624183	0.151094	0.0477892	0.0171002	0.00348884	0.00222141	0.0158868	0.0196777	0.0388802	0.0176109	0.0142873	0.017711	0.00733238	0.0251946	0.0117093	0.0461759	0.00674088	0.00244892	0.0108234	0.0279909	0.00212214	0.00903429	0.0360066	0.00253802	0.0847483	0.0237207	0.0123978	0.0317249
AATAGCAAGCCTCCTG-1	0.00479987	0.0156595	0.0473091	0.0070846	0.0231915	0.108189	0.18872	0.27568	0.0119907	0.0440547	0.00046621	0.00726824	0.0026315	0.00366334	0.00693342	0.0327351	0.00305807	0.0117254	0.000639287	0.0129126	0.00398568	0.0200751	0.00172907	0.00514393	0.00175767	0.0576247	0.00481317	0.00159379	0.00889983	0.00193726	0.0537785	0.0146936	0.00282514	0.0124303
AATAGCTACCGCGTGC-1	0.0471655	0.0183732	0.0750639	0.0139318	0.0222751	0.0768873	0.166071	0.175304	0.0193798	0.0644897	0.00113426	0.0247183	0.00666988	0.00355252	0.015213	0.0543557	0.00349058	0.0396738	0.00159686	0.00399012	0.00195825	0.00686832	0.00416563	0.0155051	0.00230435	0.0470461	0.0112311	0.00288836	0.0101388	0.00370206	0.0289612	0.00959485	0.00327061	0.019029
AATAGGCACGACCCTT-1	0.0051138	0.0015739	0.00430062	0.00605377	0.0139185	0.0440372	0.135422	0.0517103	0.0391131	0.0764295	0.00635901	0.0702197	0.0333962	0.00605691	0.0618266	0.0256425	0.00684767	0.0920888	0.00459967	0.00782804	0.0228935	0.00480299	0.0161819	0.0595749	0.00602983	0.00785158	0.055911	0.0109368	0.00773116	0.0327404	0.0153845	0.0140513	0.0127698	0.040603
AATAGTCCGTCCCGAC-1	0.00548873	0.00709116	0.0175019	0.0011141	0.0217453	0.120674	0.00995871	0.0707284	0.211135	0.0162247	0.00541664	0.00107457	0.0127943	0.0237247	0.0317694	0.00209591	0.0207728	0.012835	0.0331479	0.0254526	0.039467	0.0562971	0.0115502	0.00115166	0.0142977	0.012369	0.00079088	0.0111794	0.0477698	0.00319125	0.0783533	0.0238591	0.00994726	0.0390304
AATATCAAGGTCGGAT-1	0.0170589	0.00138351	0.00277534	0.00189348	0.009943	0.0255882	0.012935	0.0144212	0.045607	0.0559223	0.0408356	0.0282378	0.0271598	0.0264837	0.0201274	0.00620088	0.0111207	0.0229049	0.0220582	0.00996829	0.00786568	0.0236613	0.00726132	0.0417587	0.0287684	0.0107309	0.166922	0.0228265	0.0149054	0.11511	0.0423111	0.0397906	0.0459547	0.0295087
AATATCGAATCAATGC-1	0.00204274	0.00675569	0.0247711	0.00583247	0.0378488	0.111067	0.0288261	0.0847418	0.138702	0.0189461	0.00575541	0.000591919	0.00916882	0.0212529	0.0396873	0.00247725	0.0297142	0.0141443	0.0339782	0.0540519	0.0287243	0.036891	0.00818582	0.0018241	0.0160553	0.00943542	0.00118883	0.0108403	0.03796	0.00396663	0.113783	0.0154597	0.0143648	0.0309647
AATATCGAGGGTTCTC-1	0.0276616	0.00520768	0.011743	0.00332115	0.0742966	0.0543095	0.167213	0.108788	0.0175506	0.0925538	0.00458888	0.0224496	0.0131317	0.0115119	0.0138818	0.0324981	0.00715903	0.0235701	0.00147257	0.00958707	0.00163415	0.00857007	0.00385451	0.012961	0.00525408	0.0384701	0.0266674	0.0047913	0.0220817	0.01816	0.0996246	0.0204086	0.0117198	0.0233074
AATATTGGAGTATTGA-1	0.164278	0.0101439	0.0202535	0.00356499	0.00894499	0.0518526	0.113688	0.0816614	0.0245618	0.0573705	0.00435323	0.0517294	0.0022502	0.00473257	0.0342972	0.0660837	0.00533627	0.0248311	0.0202436	0.00143271	0.00119648	0.00283634	0.00305708	0.016884	0.00775803	0.0383599	0.0782968	0.00586772	0.00640841	0.0432754	0.00730621	0.00975545	0.0116308	0.0157579
AATCAGACTGCAGGAC-1	0.0102179	0.00710405	0.00549896	0.00810493	0.0079708	0.044997	0.137484	0.0586901	0.0140938	0.0647774	0.0170407	0.0686504	0.0355757	0.00465686	0.0480328	0.0267391	0.00647317	0.0908423	0.00304721	0.00684718	0.0290703	0.00389817	0.010403	0.0432632	0.00596018	0.0170029	0.0643046	0.00857552	0.00659538	0.0405321	0.0237773	0.0193062	0.013412	0.047055
AATCAGGTTTCATTTA-1	0.0570818	0.00541673	0.00809515	0.00217368	0.0139227	0.0360495	0.0106529	0.0263512	0.0288621	0.0729194	0.0286899	0.0355988	0.00828973	0.00783873	0.0195896	0.00541559	0.0165317	0.0177507	0.0203672	0.00922399	0.0121698	0.0273201	0.00386899	0.0232985	0.0221354	0.0147744	0.156584	0.0167522	0.0134368	0.125238	0.0408299	0.0313455	0.0434785	0.0379472
AATCATGTAAAGACTC-1	0.00260064	0.00719801	0.0370546	0.00320087	0.0281023	0.136476	0.041725	0.0912517	0.101131	0.019657	0.00396551	0.00237565	0.01933	0.011744	0.0724896	0.0123002	0.0365769	0.0179843	0.0334039	0.047251	0.0382648	0.0350703	0.017595	0.00262882	0.0132977	0.00907033	0.00132163	0.0115196	0.0191528	0.00309685	0.0563794	0.011191	0.00845806	0.0471354
AATCCAAGGGCCTGAG-1	0.00585572	0.00551484	0.0280421	0.0042262	0.0229381	0.0722826	0.0125385	0.0577601	0.0680027	0.0244662	0.013155	0.02323	0.0435937	0.036666	0.0191807	0.00156754	0.0135656	0.014001	0.0269278	0.013828	0.01137	0.0440972	0.0085989	0.00962147	0.0168813	0.0154591	0.0470215	0.0182726	0.0499179	0.0428302	0.108149	0.0458781	0.0516395	0.0229205
AATCCATGCAAGGGTG-1	0.00697962	0.00568922	0.0109172	0.00709072	0.0143654	0.00652448	0.00103899	0.00535101	0.0108072	0.0103363	0.0382708	0.0140772	0.000840545	0.00642476	0.00898691	0.0103446	0.00258514	0.0110633	0.0176305	0.00290997	0.000736543	0.0113845	0.00379804	0.0460434	0.0419391	0.0264522	0.26727	0.0240043	0.0172154	0.18393	0.0272339	0.0529891	0.0848872	0.0198826
AATCCCGCTCAGAGCC-1	0.0205649	0.00238796	0.00180893	0.00244721	0.0117118	0.0247646	0.0706554	0.0412206	0.0408756	0.0328189	0.0116411	0.0380009	0.00398243	0.0113173	0.017717	0.0116883	0.00188548	0.0349164	0.0237848	0.00140927	0.00114479	0.00604358	0.00427811	0.0408714	0.0204286	0.0138108	0.249606	0.010312	0.0087487	0.123792	0.00782759	0.0242268	0.0441824	0.0391286
AATCGAGGTCTCAAGG-1	0.0822397	0.0278265	0.139085	0.0292498	0.00784064	0.0502253	0.0613501	0.0709798	0.0422208	0.0355704	0.000750592	0.0283945	0.0140659	0.00142068	0.0181681	0.0906667	0.00820884	0.0316923	0.00248698	0.00639961	0.00480741	0.00778651	0.00534178	0.005752	0.00322324	0.134916	0.00368923	0.00232479	0.0080563	0.00144726	0.039837	0.0138999	0.00325008	0.0168255
AATCGCCTCAGCGCCA-1	0.00917614	0.0047997	0.0177283	0.0140686	0.0380065	0.102846	0.130332	0.171208	0.0562509	0.0517512	0.00260686	0.00780699	0.0123731	0.00488539	0.0461931	0.027989	0.0155004	0.0262331	0.00338354	0.0158801	0.00407776	0.0283979	0.00542041	0.00529855	0.00507087	0.0248932	0.0038638	0.00461737	0.0177601	0.0021635	0.0838076	0.0137523	0.00565599	0.0362028
AATCGCGCAGAGGACT-1	0.0161149	0.0100694	0.0224452	0.00301798	0.0197877	0.11846	0.0294903	0.0722059	0.0839343	0.0155305	0.0101536	0.0037915	0.0186341	0.0271631	0.0452764	0.00372157	0.0378694	0.0177038	0.0464244	0.0544917	0.0250821	0.0650163	0.0164356	0.00203497	0.0149244	0.0112374	0.0023105	0.0198218	0.053937	0.00795074	0.0713554	0.0111738	0.00901068	0.0334238
AATCGGGACACTACGA-1	0.00927643	0.00952121	0.0409599	0.00601945	0.0154735	0.0832997	0.1935	0.120636	0.0209333	0.070465	0.0107645	0.0200683	0.0262268	0.00726345	0.0550059	0.0395843	0.00712405	0.0419372	0.00246956	0.0149074	0.0230618	0.0118933	0.00932877	0.0172707	0.00336729	0.0242575	0.00587407	0.00533117	0.0136523	0.00296925	0.0328418	0.0105603	0.00475182	0.0394039
AATCGTGAGCCGAGCA-1	0.00985403	0.00922781	0.0219284	0.00493746	0.0153472	0.078571	0.136061	0.110127	0.0350033	0.0865409	0.00325068	0.0243067	0.0261425	0.017869	0.0390884	0.0132894	0.00958606	0.0503658	0.0046651	0.025669	0.0368865	0.0369449	0.00731116	0.0174996	0.00694839	0.0234477	0.00986448	0.00923481	0.0218586	0.0056478	0.0518197	0.0207897	0.0087031	0.0212125
AATCTAGGTTTACTTG-1	0.00340987	0.00677629	0.00904967	0.00125012	0.0091766	0.110572	0.0173079	0.0880516	0.197742	0.0212032	0.00465099	0.00346651	0.00921776	0.0241722	0.0450243	0.000550864	0.0224616	0.0113552	0.0573015	0.0177384	0.0200617	0.0345063	0.00991687	0.00405252	0.0162981	0.00597143	0.0213917	0.0187407	0.0299475	0.0506079	0.0755195	0.0128578	0.0146358	0.0250131
AATCTATGCCGGAGCC-1	0.2787	0.0927737	0.163677	0.0444343	0.00104041	0.00975296	0.00104904	0.00548002	0.0130145	0.000634136	0.00300396	0.0204455	0.000313021	0.00114668	0.0116959	0.109961	0.00897451	0.0781601	0.00159857	0.00190265	0.00439029	0.0129935	0.00267663	0.00137886	0.00212424	0.0693621	0.000185757	0.0010696	0.00536421	0.00011944	0.0318804	0.00691429	0.00106962	0.0127135
AATCTCTACTGTGGTT-1	0.00493732	0.00224882	0.00241971	0.000581299	0.0301789	0.0880286	0.269817	0.224611	0.0123082	0.076848	0.000134221	0.0704761	0.00659625	0.00123524	0.0122417	0.0284923	0.000456388	0.0280109	0.00199524	0.000517615	0.00331416	0.000900231	0.00154617	0.0265892	0.000896324	0.022703	0.0391953	0.00156959	0.00620492	0.0116082	0.00311093	0.00804604	0.00351144	0.00866977
AATCTGCGTTGGGACG-1	0.0128248	0.00451071	0.00960122	0.0116795	0.00970841	0.0304731	0.00480611	0.0220303	0.0245574	0.0229271	0.0166035	0.00747858	0.00747781	0.013035	0.0432016	0.00298108	0.0287672	0.00513598	0.0313341	0.0348166	0.0126088	0.0316561	0.00820157	0.0325579	0.0316756	0.0101844	0.167289	0.0206712	0.0210197	0.112165	0.0752211	0.0349623	0.0496099	0.0482274
AATCTGGCTTTCTAGT-1	0.0288027	0.00467267	0.0154726	0.00426054	0.0098811	0.118128	0.0288685	0.0839069	0.104814	0.0244668	0.00809774	0.00710241	0.0154776	0.0240322	0.0628695	0.00279697	0.0197432	0.00556199	0.0719857	0.034135	0.0148741	0.0415278	0.0125611	0.00953646	0.0176769	0.00629958	0.0535356	0.0120115	0.02102	0.0413273	0.0402911	0.00986758	0.0171424	0.0272523
AATCTGGGTAGACCCT-1	0.0177878	0.00657308	0.0211914	0.00259963	0.0877154	0.0457738	0.0405262	0.0331431	0.0996219	0.0353592	0.0247353	0.0217107	0.0246992	0.0111298	0.0424464	0.016848	0.0160769	0.0539145	0.00918505	0.0183246	0.0101281	0.0200107	0.00784355	0.0143162	0.0114359	0.0130561	0.0192738	0.0100416	0.018305	0.0132799	0.11117	0.0357388	0.0332032	0.0528354
AATGACAGCAATGTCT-1	0.01519	0.00441009	0.0158129	0.00418208	0.0119181	0.0335578	0.00920601	0.0259103	0.0324605	0.0206642	0.0145896	0.0201303	0.0146441	0.0210427	0.052837	0.0024773	0.0164435	0.0306192	0.029068	0.0131743	0.00676692	0.0349717	0.00800252	0.023202	0.0277695	0.0118639	0.139449	0.0220352	0.0238784	0.10952	0.0795511	0.0325702	0.0620404	0.0300415
AATGACGTAGGATGTC-1	0.00288109	0.0236833	0.0360556	0.0200472	0.0154228	0.116183	0.0988997	0.157667	0.0629651	0.0311417	0.00433513	0.00415259	0.0290755	0.0112445	0.0818338	0.00927186	0.0146459	0.0230543	0.00648949	0.0258022	0.0133155	0.0437463	0.00474294	0.00333672	0.00699858	0.0181258	0.00265501	0.00746502	0.022642	0.00284131	0.0499852	0.0121659	0.00636688	0.0307608
AATGACTGTCAGCCGG-1	0.0157226	0.0154673	0.0165594	0.0130075	0.0248952	0.130488	0.10446	0.183766	0.050001	0.0376846	0.00227601	0.00461698	0.00851815	0.0195894	0.0504815	0.00700943	0.0208723	0.028891	0.0247459	0.0247933	0.0176414	0.0268288	0.00495342	0.00581133	0.00691204	0.0172681	0.00407233	0.00546254	0.0147285	0.00376268	0.0651563	0.00955367	0.0102757	0.0237272
AATGAGTTCGCATATG-1	0.0833004	0.0282993	0.055077	0.0136333	0.0162608	0.0443918	0.0631954	0.0791384	0.0352083	0.0206008	0.0043326	0.040533	0.00559935	0.0122398	0.0211238	0.112112	0.010008	0.0410422	0.0112488	0.00255672	0.00184002	0.0128872	0.00654345	0.0177529	0.00690524	0.0779546	0.0428436	0.00549324	0.0143952	0.0243161	0.0414996	0.0151247	0.0119202	0.0206219
AATGATGATACGCTAT-1	0.0195823	0.0097734	0.00862687	0.00541955	0.0086226	0.0129279	0.00232251	0.00858398	0.039839	0.0148759	0.0277952	0.015492	0.00235375	0.010303	0.0246653	0.00462321	0.0111449	0.0287692	0.0219896	0.0107082	0.00253656	0.0248736	0.00573208	0.0352451	0.0395549	0.0156503	0.197905	0.0206377	0.0187311	0.162719	0.0393172	0.0637496	0.0596727	0.0252563
AATGATGCGACTCCTG-1	0.0261927	0.00480442	0.00833648	0.00286335	0.0123708	0.0634534	0.109847	0.0673943	0.0240192	0.0679623	0.0260009	0.0611439	0.03509	0.00902734	0.0493613	0.0356226	0.0192017	0.0574061	0.0021653	0.00964493	0.016798	0.0210538	0.023258	0.0410975	0.00658209	0.0183592	0.0272805	0.00880797	0.0081977	0.0150202	0.0264845	0.0169816	0.00786311	0.0703083
AATGCAACCGGGTACC-1	0.0019836	0.00644602	0.0451498	0.00804054	0.0155172	0.104095	0.154949	0.140393	0.0209937	0.0521693	0.0147124	0.013384	0.0282609	0.00842193	0.0588189	0.0317968	0.00966091	0.0338497	0.00226437	0.0263445	0.0095086	0.0217822	0.0115283	0.011233	0.00343093	0.0285584	0.00459489	0.00561769	0.0164412	0.00253031	0.0516076	0.0131843	0.00439095	0.0383398
AATGCACCAAGCAATG-1	0.0628232	0.00065362	0.000989088	0.000227962	0.0174657	0.0208855	0.123641	0.0397681	0.0220339	0.307753	0.00426097	0.0490949	0.0150555	0.00827269	0.0156455	0.0287766	0.00361971	0.0465718	0.00213892	0.00358394	0.00144663	0.00672685	0.00447472	0.0276064	0.0022321	0.0115499	0.0183246	0.0031561	0.00238479	0.0169866	0.0974961	0.00782867	0.00285043	0.0236752
AATGGTCCACCGTTCA-1	0.0126658	0.00385614	0.0242131	0.0031636	0.0173306	0.0853625	0.0915348	0.0889103	0.0582027	0.103713	0.0233093	0.0185115	0.0263949	0.0299445	0.0265567	0.0138517	0.0109748	0.04849	0.0114662	0.0266955	0.0157633	0.0245412	0.00911937	0.0152948	0.0102216	0.0161613	0.0159913	0.00761847	0.0151045	0.0136123	0.0649171	0.0162308	0.0148876	0.0353892
AATGGTTCTCACAAGC-1	0.00386983	0.00161039	0.00267731	0.00485445	0.0117868	0.0150347	0.00330893	0.00790881	0.0331126	0.0130481	0.0304168	0.0175801	0.0124949	0.00816638	0.011043	0.00451725	0.00865884	0.0146374	0.0217115	0.0102733	0.00161405	0.032544	0.00401241	0.0319885	0.0565339	0.0300159	0.241763	0.01804	0.0181196	0.164434	0.0164244	0.0506474	0.075066	0.0220853
AATGTATGGCACTGTA-1	0.129455	0.0264123	0.140539	0.0144148	0.00878629	0.0315764	0.0590897	0.0616051	0.0185916	0.0674058	0.000671137	0.0379334	0.00854	0.00854063	0.0131928	0.100703	0.00237349	0.0521033	0.00163165	0.00108916	0.00135381	0.00560339	0.0028196	0.00824679	0.00272538	0.114669	0.00625093	0.00163831	0.00918403	0.00261187	0.0358038	0.0155526	0.00375334	0.00513224
AATGTGCCCGAGGTGT-1	0.0113994	0.00469081	0.00691322	0.0011589	0.00979487	0.10659	0.0742196	0.116874	0.11055	0.0327655	0.00115373	0.00530684	0.0192052	0.0146642	0.0934291	0.00435093	0.0277669	0.0201035	0.0602498	0.0307913	0.0271314	0.0238782	0.0149698	0.00615104	0.0130102	0.00774952	0.00547338	0.0179118	0.0247514	0.0106481	0.0329858	0.00842958	0.012378	0.0425535
AATGTGCTAATCTGAG-1	0.0110695	0.00469723	0.00217282	0.00467444	0.0231163	0.0162434	0.00402496	0.0118289	0.0190032	0.0284517	0.0220363	0.0155349	0.00242251	0.00872595	0.00983901	0.0150756	0.0157847	0.00829457	0.0236753	0.00517772	0.00261507	0.020777	0.00574936	0.0408142	0.0379116	0.01498	0.243036	0.0185949	0.0127891	0.162881	0.0345542	0.0596304	0.064804	0.0290141
AATGTTAAGACCCTGA-1	0.072035	0.0318422	0.183082	0.0327639	0.00624609	0.0449104	0.0428064	0.060508	0.0223472	0.061614	0.00341831	0.0297797	0.00522238	0.00184499	0.010243	0.124023	0.00831482	0.0519537	0.00594375	0.0034965	0.00526528	0.0117785	0.0045383	0.0046906	0.00308562	0.108815	0.00246661	0.00219587	0.00779982	0.00147269	0.0260693	0.00681663	0.00231481	0.0102956
AATTAAAGGTCGGCGT-1	0.028027	0.00281496	0.00364008	0.00236979	0.0153462	0.0712009	0.189299	0.13153	0.030512	0.0615231	0.0023618	0.0769435	0.0171849	0.00602285	0.0440942	0.0187244	0.00187716	0.0317049	0.00364753	0.00148776	0.00598505	0.00313145	0.00391803	0.0259092	0.00489134	0.0137517	0.0993808	0.0040058	0.00501229	0.0413444	0.00547262	0.00972179	0.0135596	0.0236047
AATTAACGGATTTCCA-1	0.0182566	0.00629902	0.0148377	0.00237331	0.0149678	0.0852674	0.0625483	0.0580107	0.0605657	0.0716157	0.00650027	0.0174715	0.0269044	0.0447509	0.0711481	0.00965473	0.0275255	0.0456224	0.020506	0.0412877	0.038724	0.0250992	0.0141968	0.0165562	0.0114618	0.00672966	0.004354	0.0130476	0.0173154	0.00475246	0.0674531	0.0198396	0.0122261	0.0421303
AATTACGAGACCCATC-1	0.0141266	0.00549175	0.0173186	0.0029671	0.0148744	0.0775791	0.110911	0.112797	0.022262	0.060641	0.0241519	0.0148338	0.00892725	0.0140882	0.0157498	0.0344811	0.00485366	0.0306042	0.0252248	0.00585044	0.00233909	0.0183595	0.00391797	0.0236279	0.0158865	0.02753	0.0823631	0.0107039	0.0206029	0.0501602	0.0610093	0.0341148	0.023234	0.00841757
AATTAGCGCTGCAGCG-1	0.0123383	0.00688051	0.0159942	0.00250629	0.0155079	0.0881156	0.0129756	0.0576437	0.12305	0.0208566	0.00545262	0.00473199	0.0188368	0.023501	0.0365583	0.00301386	0.02809	0.0268164	0.0379447	0.0337195	0.0146388	0.0495344	0.0151052	0.0056178	0.017998	0.00698708	0.028927	0.0174807	0.0334744	0.0316555	0.101783	0.0229443	0.0213846	0.0579358
AATTATACCCAGCAAG-1	0.0499202	0.0273002	0.102241	0.00882077	0.0407569	0.0801902	0.0927927	0.119882	0.0313929	0.0346541	0.00539589	0.00794398	0.0111791	0.00768416	0.0296708	0.0494451	0.00863957	0.0380212	0.00228911	0.031595	0.00256196	0.0351827	0.00328555	0.00288517	0.00407241	0.0634208	0.00133869	0.00265805	0.0113824	0.000782596	0.0508382	0.0151949	0.00361352	0.022969
AATTCATAAGGGATCT-1	0.0279227	0.00436189	0.0165174	0.00545018	0.031662	0.0200299	0.00440026	0.012798	0.0208614	0.0255155	0.0500625	0.0156736	0.0134011	0.0218372	0.0218958	0.010487	0.0212012	0.0135067	0.0100408	0.0107405	0.00340539	0.0235563	0.00573471	0.0337115	0.0273196	0.0109142	0.170508	0.0190763	0.0167928	0.12222	0.0825333	0.0492265	0.0522368	0.0243989
AATTCATTGTCATGCA-1	0.0850622	0.0236094	0.181249	0.0212635	0.0110533	0.0914761	0.0543263	0.0932468	0.0449119	0.0275944	0.000806698	0.0192824	0.00711529	0.00592849	0.0166657	0.0550944	0.00531517	0.0546293	0.0048709	0.00493109	0.00204714	0.0115831	0.00271367	0.00233382	0.00470008	0.0543931	0.00236441	0.0035427	0.0170109	0.00236932	0.0670595	0.0135403	0.00454283	0.00336718
AATTCCAAGCATGTAC-1	0.00374251	0.0138997	0.00962946	0.00307578	0.016947	0.128039	0.119586	0.155951	0.0283715	0.0250917	0.00133534	0.0171133	0.0185513	0.0411705	0.0615875	0.0108531	0.0107255	0.0291328	0.0244218	0.0306571	0.0170875	0.0369316	0.00929827	0.00827116	0.00886589	0.0379426	0.00967218	0.00739136	0.0185845	0.00472152	0.0297503	0.0144004	0.00686071	0.0403404
AATTCGATTCGAGGAT-1	0.0261775	0.00778516	0.028384	0.0054041	0.0245618	0.078618	0.118466	0.121902	0.0345691	0.0523351	0.00524826	0.0141878	0.0155318	0.0130621	0.0231913	0.0223518	0.016753	0.0289056	0.0140022	0.0188753	0.00251144	0.0201222	0.00676707	0.0129002	0.0120433	0.0376595	0.0422127	0.013334	0.0191588	0.0354395	0.0491915	0.0234257	0.0188616	0.03606
AATTCTAGAGTTAGGC-1	0.0124305	0.0107392	0.0409163	0.00697826	0.0146637	0.0719306	0.0120739	0.0534265	0.237395	0.0151971	0.00581845	0.00938622	0.0225954	0.0294462	0.0746589	0.0110328	0.0290448	0.00518289	0.0154609	0.020411	0.0118843	0.0504024	0.0139682	0.00170393	0.0135301	0.00792525	0.000709788	0.0132818	0.0314267	0.00234357	0.10196	0.00911046	0.00653664	0.0364289
AATTGAACGCTCTGGT-1	0.0746453	0.0500539	0.192746	0.0366883	0.00640397	0.0488988	0.0110906	0.0368682	0.0308347	0.0433208	0.00690305	0.0165118	0.00807088	0.00268668	0.0160054	0.0849185	0.00812011	0.0450107	0.00213675	0.00602567	0.00181503	0.037529	0.00516499	0.00131701	0.00386373	0.113964	0.000416693	0.00250966	0.0127896	0.000687194	0.0641954	0.0124344	0.00382347	0.0115496
AATTGCAGCAATCGAC-1	0.00519098	0.00397899	0.00404347	0.00123058	0.00910203	0.0862604	0.0960936	0.0889462	0.148961	0.0355246	0.00397942	0.0161231	0.0113126	0.0182669	0.0718103	0.0186156	0.00838965	0.0235208	0.0352706	0.0128953	0.0294102	0.0204468	0.00730512	0.0290965	0.00864016	0.0102756	0.0276649	0.0143477	0.0305886	0.0188423	0.025861	0.0112116	0.0102379	0.0565554
AATTGCGTGGATTACA-1	0.0720073	0.0145223	0.0356293	0.0129196	0.0152353	0.0584396	0.145898	0.110142	0.0299835	0.0607542	0.00458217	0.062654	0.0073195	0.00436203	0.0102429	0.039528	0.0017908	0.0429121	0.00510147	0.00159094	0.00503159	0.00602068	0.00468301	0.0202998	0.00473987	0.0468337	0.0641901	0.0043171	0.00999942	0.0332273	0.0292253	0.0116172	0.00885958	0.0153406
AATTTGGGACATAGTA-1	0.170436	0.0271067	0.0521453	0.0109248	0.286309	0.00222156	0.000188408	0.00142938	0.019795	0.00120507	0.0154788	0.00710718	0.00101637	0.00231586	0.0209295	0.105965	0.00256212	0.0473746	0.0074429	0.00211365	0.0090877	0.0283266	0.00214038	0.0007137	0.00314548	0.0286692	8.765e-05	0.00283616	0.0201938	0.000119207	0.082533	0.0160739	0.00192088	0.0200853
AATTTGGTTCCAAAGA-1	0.0895396	0.0240734	0.121245	0.0154115	0.0124065	0.0535705	0.0834801	0.095649	0.0240722	0.0662208	0.000621256	0.0186957	0.00567373	0.008808	0.0120314	0.0950812	0.00490344	0.0495894	0.00488561	0.00305145	0.00199485	0.00739693	0.00313863	0.00716663	0.00327702	0.109068	0.00364419	0.00183511	0.00804804	0.00135315	0.039775	0.0109241	0.00200283	0.0113653
ACAAACCATGCGTCCT-1	0.297699	0.0411068	0.19297	0.0266308	0.00123967	0.0145531	0.00148708	0.00825107	0.0435956	0.00268493	0.000530059	0.0205671	0.00101367	0.00264402	0.00579352	0.0980824	0.00387333	0.0819156	0.00616447	0.00214364	0.00291891	0.0172047	0.00167262	0.000722851	0.00181126	0.0645399	0.000165026	0.00103948	0.00648844	0.000246587	0.0399499	0.0040078	0.00122426	0.00506302
ACAAACCGACAAGGCG-1	0.108162	0.0199386	0.0877032	0.0330353	0.00407465	0.0111238	0.00806488	0.00940823	0.0413206	0.131648	0.00300835	0.0729793	0.00269113	0.00323051	0.0104998	0.0968301	0.00293122	0.0579163	0.00332225	0.000824004	0.00106931	0.00545701	0.00525922	0.0167004	0.0054747	0.125534	0.0307126	0.00293767	0.00579878	0.0172213	0.0443077	0.0109893	0.0059767	0.013849
ACAAACTCCATCAGAG-1	0.00448427	0.00687459	0.0172184	0.00251551	0.0191117	0.0864954	0.0329252	0.0664899	0.128662	0.0256302	0.0150446	0.0095903	0.0195264	0.0195527	0.0563689	0.00539238	0.0141979	0.0255909	0.0327601	0.0377645	0.0169704	0.0214903	0.00979435	0.00940252	0.0175743	0.00745899	0.0372474	0.0152979	0.033417	0.0324915	0.0700937	0.0175107	0.0297006	0.0553549
ACAAAGCATGACCTAG-1	0.0299522	0.00305617	0.00377956	0.00139023	0.00918789	0.0733802	0.0292772	0.0388574	0.142379	0.0544055	0.017362	0.0243737	0.0216427	0.0150178	0.0417396	0.00453846	0.00996263	0.0173114	0.0497277	0.0129217	0.0496398	0.0162475	0.0133596	0.0251423	0.0171706	0.00607932	0.0649632	0.0141289	0.0137037	0.0432985	0.0330698	0.0145246	0.0279491	0.0604598
ACAAATCGCACCGAAT-1	0.0230956	0.011697	0.0184727	0.00206269	0.0113923	0.119147	0.0492284	0.0954594	0.127057	0.058335	0.00293124	0.00876075	0.010343	0.0271072	0.0489626	0.00159607	0.025249	0.0256922	0.0330685	0.0325196	0.0170464	0.0409455	0.0116093	0.00425539	0.0118303	0.00710306	0.00259078	0.016658	0.0306828	0.00750525	0.0754665	0.0080932	0.00748457	0.0265524
ACAAATGGTAGTGTTT-1	0.0757342	0.0367377	0.317632	0.024476	0.0045654	0.01553	0.00185017	0.00979929	0.0197356	0.0516397	0.00397634	0.0150384	0.00316155	0.00323409	0.0094158	0.104692	0.013941	0.0533676	0.000717652	0.0107122	0.0022619	0.0119146	0.0032673	0.00118334	0.00279217	0.113353	0.000218542	0.00167365	0.00570619	0.00033336	0.0540013	0.0155368	0.00141022	0.010391
ACAAATTCAGATCTGA-1	0.0110773	0.00291599	0.01187	0.00714343	0.0378044	0.0465808	0.10716	0.0345474	0.045721	0.0706655	0.0130737	0.0760361	0.0482687	0.00400758	0.05306	0.0265329	0.00877435	0.122248	0.00550967	0.00918752	0.0342195	0.011339	0.0211691	0.0411522	0.00386769	0.0080501	0.00990745	0.0117101	0.0145156	0.00558817	0.0382853	0.017034	0.0046033	0.0363749
ACAACAGCATGAGCTA-1	0.0092396	0.0153141	0.0294157	0.00593312	0.025738	0.121352	0.150523	0.19913	0.0159082	0.0540439	0.0025957	0.00992816	0.00992258	0.00795026	0.0152183	0.0363128	0.0104668	0.020225	0.00568605	0.0201014	0.00380696	0.0392556	0.00393091	0.00834413	0.00417688	0.0467353	0.00776859	0.00453757	0.0225102	0.00432847	0.0477338	0.0187397	0.00753588	0.0155916
ACAACGGTCCCTGCGA-1	0.00842724	0.00823046	0.027511	0.00425908	0.0219405	0.114135	0.141443	0.14662	0.0311064	0.0612038	0.00559091	0.00948731	0.00921556	0.0265085	0.0586034	0.0222291	0.0227977	0.0368723	0.0132895	0.0341649	0.00927095	0.0218831	0.00625756	0.00774655	0.00552954	0.0205141	0.0047211	0.00535336	0.0152675	0.00248568	0.0434518	0.0146149	0.00696371	0.0323048
ACAAGCAGTGCCTAGC-1	0.00590524	0.00744334	0.0245937	0.00219383	0.0260216	0.0770084	0.0626258	0.0888593	0.134827	0.0233075	0.00420655	0.00565579	0.0276747	0.0273412	0.0140797	0.00989584	0.0232974	0.0297061	0.0137342	0.0263276	0.0106459	0.0423924	0.0070278	0.00691647	0.0144315	0.0454753	0.00962634	0.011439	0.0318359	0.00931805	0.108302	0.0186787	0.0147728	0.0344329
ACAAGGAAATCCGCCC-1	0.0179691	0.00669294	0.0120028	0.00141151	0.013907	0.0967859	0.0197785	0.0739342	0.16694	0.0910779	0.00237809	0.00508725	0.0164331	0.0271917	0.0444395	0.00336944	0.0166767	0.0192936	0.0439689	0.050254	0.0165616	0.0423161	0.00802394	0.00302375	0.0120598	0.00719177	0.00208579	0.0131446	0.0241919	0.00902983	0.0795421	0.00951705	0.00622066	0.0374987
ACAAGGACAAGAGGTT-1	0.00425987	0.00949108	0.0383156	0.00961726	0.0225519	0.0965645	0.171652	0.178611	0.0194461	0.0738797	0.00262659	0.0127432	0.0216991	0.00653626	0.0237064	0.0467267	0.00725916	0.0317968	0.00355896	0.0100336	0.00179404	0.0135544	0.00439256	0.0133262	0.00328574	0.0439659	0.00818858	0.00306331	0.0173604	0.00371793	0.0487565	0.0168769	0.00650434	0.0241372
ACAAGGATGCTTTAGG-1	0.189624	0.0296236	0.124796	0.0335071	0.013426	0.0245436	0.0113235	0.0251177	0.0223661	0.0203099	0.00227564	0.0503551	0.00472772	0.00543886	0.0116702	0.0829617	0.00506437	0.0431224	0.0087055	0.00883686	0.00273118	0.0126858	0.00367723	0.00681548	0.00689919	0.106971	0.0192759	0.00325886	0.0112838	0.0115008	0.0593884	0.0120044	0.0054116	0.0203007
ACAAGGGCAGGCTCTG-1	0.0128552	0.018783	0.0634923	0.0133175	0.035024	0.129342	0.0674875	0.158792	0.0324289	0.0158339	0.00779246	0.00257168	0.0110298	0.0222006	0.0306226	0.0129421	0.0260484	0.0120612	0.00573794	0.0270667	0.00755604	0.057	0.00498431	0.0014943	0.00596401	0.0273497	0.000916183	0.00474543	0.0262116	0.00105668	0.115179	0.0125434	0.00562986	0.0239399
ACAAGTAATTGTAAGG-1	0.031413	0.00337693	0.00490198	0.00325333	0.0149983	0.0476448	0.11544	0.065136	0.0545534	0.0725565	0.00876222	0.0569037	0.0144144	0.00850161	0.037885	0.0155752	0.00700733	0.0494959	0.0101254	0.0151104	0.0112015	0.0109569	0.00947028	0.0335538	0.00984541	0.0186052	0.0700039	0.01073	0.0112149	0.0496234	0.0364578	0.0187304	0.0218538	0.0506974
ACAATAGTCGTACGTT-1	0.0995105	0.020007	0.0385112	0.0148731	0.0123617	0.0432308	0.0800363	0.0657702	0.0344025	0.0195939	0.00601152	0.0511617	0.00408325	0.00197164	0.0297027	0.0514483	0.00216242	0.0551173	0.0280697	0.00129634	0.00197781	0.00863897	0.00405939	0.0259185	0.010356	0.036619	0.109119	0.00689073	0.00795517	0.0637442	0.00995821	0.0140737	0.0204327	0.020935
ACAATCCATTTAAACC-1	0.0228612	0.00293358	0.0036957	0.00263534	0.0137661	0.0320368	0.0909028	0.0590983	0.0304786	0.0284622	0.00812826	0.0335933	0.00516358	0.00229128	0.00967478	0.0169244	0.00210039	0.0392316	0.0116168	0.00552427	0.00184277	0.00411984	0.00246839	0.0325177	0.0204095	0.0169874	0.260737	0.011473	0.00813782	0.13425	0.00660306	0.0179653	0.0425697	0.0187994
ACAATCGATCTTTATA-1	0.368156	0.0849932	0.0890175	0.0319731	0.00106616	0.00991301	0.00119488	0.00465741	0.0204888	0.000939627	0.000982277	0.0420852	0.0030465	0.00716282	0.00980913	0.0788117	0.00348589	0.0682846	0.00635298	0.00240033	0.00156189	0.00424197	0.00256575	0.00161595	0.00235662	0.0787446	0.000203814	0.00114755	0.00680228	0.000146576	0.0440877	0.00578962	0.00153072	0.0143836
ACAATGAATACGGAGA-1	0.00325906	0.00457949	0.0404909	0.00119111	0.0205295	0.126073	0.0217131	0.137018	0.17028	0.0155389	0.00203626	0.00120574	0.0227357	0.031055	0.0360542	0.00114726	0.0239447	0.00825102	0.0482273	0.0272353	0.0142259	0.0400602	0.0144227	0.00116809	0.0124058	0.00379914	0.000769678	0.0106747	0.0430458	0.00465809	0.0745225	0.00763217	0.00676924	0.0232803
ACAATGATTCTTCTAC-1	0.00711804	0.0180917	0.0424326	0.00509155	0.0220429	0.115709	0.156553	0.282754	0.0109075	0.0750182	0.000826509	0.0106875	0.00229367	0.011875	0.00959152	0.0457417	0.00239021	0.0231736	0.00249108	0.00279908	0.000633965	0.00805583	0.0029623	0.0073097	0.00134853	0.0460923	0.00609468	0.00164184	0.0140976	0.00189563	0.0382333	0.0133228	0.0025183	0.00820516
ACAATTGTGTCTCTTT-1	0.00297819	0.00579307	0.0103781	0.00972167	0.0351728	0.054575	0.010697	0.0449138	0.0475846	0.0148438	0.0332503	0.0154824	0.0269937	0.0193131	0.0242605	0.00682804	0.0185378	0.0355039	0.0222908	0.0197533	0.0111036	0.0371724	0.00946648	0.0217552	0.0276998	0.00963789	0.114061	0.0203826	0.0414771	0.088951	0.0497027	0.0340299	0.04588	0.0298082
ACAATTTGAGCAGTGG-1	0.0542522	0.00500767	0.0165907	0.00362373	0.0183589	0.0674499	0.0158186	0.0475858	0.0783407	0.144997	0.00689492	0.0165343	0.0241437	0.0219778	0.0179409	0.00435393	0.0177744	0.025916	0.00996632	0.0248753	0.0143074	0.0576334	0.00623183	0.00350138	0.0117135	0.0156905	0.0023082	0.0121184	0.0388961	0.00838347	0.152694	0.0167328	0.00805942	0.0293272
ACACAAAGACGGGTGG-1	0.0157569	0.0223181	0.0390652	0.0057091	0.0576338	0.100442	0.191758	0.214644	0.0145808	0.070955	0.000998278	0.0151119	0.00990839	0.006669	0.00813209	0.0305853	0.00644635	0.0137598	0.00113398	0.00806921	0.00155614	0.0134234	0.00395934	0.0109382	0.00243624	0.0392281	0.00773374	0.00303442	0.0125782	0.00292331	0.0328867	0.014857	0.00391826	0.0168497
ACACACCAGGACCAGT-1	0.0230994	0.0128745	0.0562877	0.0190739	0.0570844	0.0746623	0.0345082	0.0433552	0.0369019	0.0504483	0.0129857	0.0140614	0.0405056	0.0189155	0.0665433	0.0295876	0.0177571	0.0492406	0.00886995	0.0434761	0.0204451	0.0733047	0.0110142	0.00768953	0.00807967	0.0144952	0.00119487	0.00775889	0.0222175	0.00203523	0.0847779	0.00932807	0.00697596	0.0204445
ACACACTTTCTACACG-1	0.0214477	0.0182915	0.0430602	0.00413039	0.0179375	0.0939056	0.131296	0.174202	0.0502418	0.0503416	0.000713754	0.020786	0.00643321	0.0146351	0.0331877	0.0283832	0.00591741	0.029871	0.0187509	0.00837043	0.00306374	0.0138974	0.00357478	0.00827267	0.00472937	0.0765398	0.00593609	0.00359958	0.0153401	0.00235944	0.051525	0.0133835	0.00481376	0.021062
ACACATGATCAAATCT-1	0.0341916	0.00180775	0.0042623	0.00341431	0.00930823	0.0442176	0.0515973	0.0251212	0.048246	0.0833107	0.00625568	0.0583615	0.0131825	0.0552633	0.0632588	0.00611675	0.010378	0.0458202	0.0267013	0.0205942	0.017579	0.022979	0.0104217	0.0365751	0.0131232	0.00465322	0.0921575	0.0139472	0.0116598	0.0571244	0.0366538	0.010378	0.0210864	0.0402526
ACACATTTCCGTAGAC-1	0.0104359	0.00158498	0.00485115	0.00126372	0.0123859	0.0822549	0.0925784	0.0715375	0.0636424	0.0525818	0.0188145	0.0446817	0.0379843	0.021338	0.0521224	0.0185426	0.0191025	0.0628651	0.00850079	0.0111416	0.0147458	0.0230116	0.0218984	0.023733	0.00731521	0.00651596	0.0375164	0.0103774	0.0331719	0.0219026	0.0449325	0.0103331	0.00941097	0.0469247
ACACCACATAATTAGC-1	0.0562684	0.00392934	0.00546269	0.00208099	0.010033	0.0349753	0.018259	0.025712	0.0397431	0.147858	0.0326699	0.0303654	0.00586944	0.024266	0.0184258	0.0142264	0.00779826	0.0202292	0.019856	0.00703567	0.00174661	0.0213724	0.00529383	0.0249752	0.0223064	0.0135407	0.0976704	0.0117592	0.0126791	0.0681737	0.0853072	0.0382138	0.0376615	0.0342362
ACACCCAGCATGCAGC-1	0.00124166	0.0172349	0.0421509	0.00537057	0.028356	0.120626	0.169018	0.308323	0.0144551	0.0377601	0.000296862	0.00841441	0.0104682	0.0112684	0.0204519	0.0304879	0.0034254	0.0197094	0.00101815	0.0189567	0.00683422	0.0060673	0.00215016	0.0071965	0.0015996	0.0500048	0.00524677	0.00203728	0.00825938	0.00209052	0.0142105	0.0112518	0.00240739	0.0116103
ACACCCGAGAAATCCG-1	0.0190328	0.00189532	0.002732	0.0030835	0.00816652	0.0117044	0.00253593	0.00772235	0.0319351	0.0294992	0.0150178	0.0158079	0.00947209	0.00713891	0.0135129	0.00613679	0.00772403	0.0175716	0.04255	0.0122294	0.00454073	0.0291857	0.00539378	0.0431576	0.0316929	0.0132787	0.229869	0.0183014	0.0151916	0.151612	0.0545013	0.0396842	0.0592579	0.0388645
ACACCGGTCTGACCGC-1	0.151526	0.0317127	0.114027	0.0171509	0.00866199	0.0477975	0.0136671	0.0463797	0.0410885	0.0150796	0.00137922	0.0443433	0.00192649	0.0119995	0.0356325	0.0890176	0.00476527	0.087753	0.00464328	0.00670266	0.00168342	0.0129507	0.00305471	0.00323325	0.00676921	0.0935858	0.0103477	0.00315651	0.00901514	0.00622655	0.0308761	0.0163421	0.0106088	0.0168959
ACACCTTAAGTAGGGC-1	0.013337	0.0123018	0.0457864	0.00910551	0.0112665	0.092784	0.119289	0.13397	0.0414977	0.0596778	0.00928065	0.0101152	0.0079862	0.010479	0.0381908	0.0200281	0.00990609	0.0485189	0.00746813	0.0139985	0.00476091	0.0203317	0.00525439	0.0129592	0.00791328	0.052566	0.00968507	0.00595584	0.0211598	0.00571954	0.0607667	0.031595	0.0159373	0.0304081
ACACCTTACTACTTGC-1	0.0241327	0.00462425	0.0117477	0.00195056	0.0225761	0.111993	0.0194033	0.0789748	0.154918	0.0496878	0.00877936	0.00431345	0.0193206	0.0275076	0.0353042	0.00105117	0.0269213	0.0368451	0.0461654	0.0394991	0.0250951	0.0544394	0.00721507	0.00159767	0.00937277	0.00305003	0.000648652	0.0084181	0.0222116	0.00279505	0.0856341	0.00669896	0.00756829	0.0395405
ACACGAGACTCCTTCT-1	0.00332877	0.00480702	0.0187896	0.00479411	0.0408902	0.103633	0.145841	0.209798	0.0218177	0.0541028	0.0102212	0.00982411	0.00727464	0.0177707	0.0243532	0.042161	0.00941249	0.0183516	0.0127183	0.0144486	0.00414122	0.0344558	0.00358514	0.00660807	0.00418835	0.0320713	0.00450727	0.00373448	0.0210098	0.00226021	0.0644803	0.0121145	0.00555618	0.026949
ACACGGCACTATGCAT-1	0.0477724	0.00210364	0.00475119	0.00153317	0.0201853	0.0443383	0.0739717	0.042051	0.0521429	0.108029	0.00529248	0.0406627	0.0206605	0.0109524	0.104802	0.00957481	0.00952338	0.0420205	0.00805272	0.0113751	0.0115298	0.00833822	0.00663497	0.032014	0.00950388	0.0113776	0.0654349	0.0109299	0.00792587	0.0409171	0.0629886	0.0212822	0.0199384	0.0313893
ACACGGGAACTTAGGG-1	0.00152932	0.0122925	0.0338513	0.00689988	0.0226842	0.0392653	0.006557	0.0325038	0.048046	0.00807413	0.0169686	0.00405375	0.0036045	0.0255729	0.018931	0.00352983	0.0245543	0.0180363	0.016738	0.0246025	0.00402231	0.0451557	0.00801303	0.016376	0.0285167	0.0231432	0.102397	0.0268501	0.0568801	0.0839577	0.0955348	0.0606024	0.0537941	0.0264618
ACACGTAGGCCACAAG-1	0.0339997	0.00509719	0.00820515	0.00355397	0.0235745	0.092762	0.124037	0.125288	0.0532095	0.0412033	0.00529467	0.0230056	0.0191311	0.00780272	0.0303377	0.0240089	0.0062839	0.0331087	0.0184142	0.00897398	0.00820625	0.0129382	0.006279	0.0164462	0.00961924	0.0266405	0.0499046	0.00841186	0.0249305	0.0304986	0.0476474	0.0195048	0.0179239	0.0337572
ACACTCCAATGTCACT-1	0.149	0.0249042	0.0976113	0.0171432	0.00747922	0.048949	0.066295	0.0658584	0.0191984	0.0837756	0.00357059	0.0402286	0.0042085	0.00635808	0.00897375	0.0823159	0.00252453	0.0572553	0.0024854	0.00575074	0.00113882	0.00697203	0.00524698	0.00706834	0.00233896	0.0926875	0.00466032	0.00196054	0.00965665	0.0026605	0.0466738	0.00852081	0.0046105	0.0119187
ACACTGATCAAGGTGT-1	0.00377114	0.00311746	0.00427358	0.00149502	0.0202638	0.0850956	0.0549216	0.0575497	0.0867925	0.0425145	0.00640348	0.0388017	0.0330473	0.0273432	0.0719192	0.00684266	0.0149141	0.034341	0.0618896	0.0352904	0.0212426	0.0330773	0.0132343	0.0178816	0.0120539	0.00608805	0.052406	0.0112384	0.020121	0.03954	0.0330259	0.00968361	0.0120056	0.0278141
ACACTGGGACAGTCGT-1	0.0132543	0.0110125	0.0157638	0.00471454	0.00608168	0.0793409	0.0625288	0.022075	0.0375671	0.078576	0.0180712	0.0287806	0.0256075	0.00839558	0.0881163	0.0430416	0.0344647	0.0975975	0.00638744	0.032349	0.0538843	0.016194	0.0241008	0.0326002	0.0050335	0.00685277	0.00456425	0.00949448	0.00835339	0.00294473	0.0196604	0.0086629	0.00475921	0.089169
ACAGAACTGAGAACAA-1	0.00408334	0.00428963	0.0322072	0.00609491	0.011611	0.100683	0.0163664	0.0756421	0.16513	0.0105625	0.00265538	0.000551888	0.00880566	0.0302951	0.0430405	0.000920439	0.0231423	0.0143441	0.0281386	0.0710215	0.0135857	0.0571967	0.00968515	0.001774	0.0228433	0.0192831	0.00278574	0.0161615	0.0526534	0.00795118	0.0753221	0.017675	0.0203104	0.0331872
ACAGATTAGGTTAGTG-1	0.0222239	0.00459092	0.0258519	0.0039949	0.0274564	0.084034	0.0977943	0.100507	0.05947	0.121354	0.00408501	0.0154072	0.0260838	0.0178736	0.0319606	0.0114582	0.0170966	0.0410734	0.00975779	0.027036	0.0146578	0.0147134	0.00778824	0.0126712	0.00777793	0.0219663	0.00703069	0.0086642	0.0198386	0.00639838	0.0741261	0.0219358	0.0066118	0.0267099
ACAGCATAGAGCCAGT-1	0.0886171	0.0585685	0.220085	0.0267505	0.0169706	0.0427198	0.00598889	0.0354269	0.0152232	0.00548611	0.00207644	0.0217699	0.00191753	0.0045894	0.0102764	0.089386	0.011695	0.0743594	0.00148192	0.00645808	0.0021474	0.0183594	0.00295937	0.00125609	0.00365272	0.0961564	0.000384162	0.00216218	0.0106667	0.000555927	0.0934691	0.0154055	0.0047768	0.00820181
ACAGCGACATTCTCAT-1	0.0119537	0.00513091	0.00684485	0.00378518	0.0199967	0.0639005	0.0932392	0.0896073	0.0579465	0.0458503	0.00566544	0.0206877	0.0318321	0.0105166	0.0284112	0.015492	0.0074731	0.0285048	0.025493	0.0221523	0.0263878	0.0206981	0.00553707	0.021443	0.0142492	0.0180838	0.0992159	0.0111048	0.0203602	0.0628462	0.0244004	0.0154443	0.0204899	0.0452559
ACAGCGCACCCGCAGC-1	0.0663057	0.000974009	0.0016666	0.000637138	0.0481895	0.0330645	0.0255014	0.0345472	0.0492894	0.233944	0.0130508	0.0240935	0.00251491	0.00730618	0.0129154	0.00360349	0.0104455	0.0277136	0.0108843	0.00788626	0.00297864	0.0180056	0.00692464	0.018364	0.013387	0.00551066	0.0660292	0.013427	0.00896802	0.0629515	0.117317	0.0138306	0.0160483	0.0217241
ACAGGCTTGCCCGACT-1	0.00576948	0.00501274	0.0140082	0.000897878	0.015409	0.150454	0.0588723	0.136229	0.130676	0.0442631	0.00298227	0.00308261	0.0116973	0.0121187	0.0637046	0.00129559	0.0224573	0.0165356	0.0300879	0.0523818	0.00767965	0.0179496	0.00933488	0.00472264	0.0164395	0.00881186	0.00474691	0.0119806	0.029236	0.00874402	0.0503953	0.0100048	0.00999961	0.032019
ACAGGTGGAGGTGAGG-1	0.00211453	0.0128556	0.0152615	0.00207973	0.017109	0.0935114	0.0148061	0.0743838	0.156977	0.030618	0.00656402	0.00174537	0.0196652	0.0487693	0.0607656	0.000320338	0.0644005	0.0223642	0.0293673	0.0344724	0.00862502	0.0438197	0.00976305	0.00186059	0.0136577	0.00503817	0.000837316	0.0147474	0.0240154	0.00431343	0.112684	0.0119103	0.00971848	0.030858
ACAGTAATACAACTTG-1	0.0135496	0.00659196	0.0238927	0.0108733	0.0196455	0.128503	0.0759807	0.133479	0.0930236	0.0459321	0.00891066	0.0141778	0.0344682	0.0199192	0.0366777	0.00787092	0.0201462	0.0154788	0.0292789	0.0371851	0.0178726	0.0260004	0.00670886	0.00398705	0.00969166	0.0130219	0.00314102	0.00868888	0.0191554	0.00409594	0.0649876	0.0112335	0.00692296	0.0289071
ACATAAGTCGTGGTGA-1	0.00397545	0.00345258	0.00777596	0.00124585	0.0119292	0.0620649	0.0172799	0.042086	0.0368	0.0225862	0.0625301	0.0135289	0.00797012	0.0147374	0.0571907	0.000484854	0.0152552	0.0389842	0.0185727	0.015952	0.00762636	0.0319491	0.00558717	0.0174114	0.026042	0.00780725	0.143853	0.0156784	0.0307722	0.0821558	0.067416	0.0234087	0.0343912	0.0514993
ACATAATAAGGCGGTG-1	0.00558293	0.019382	0.0253822	0.0028331	0.0526798	0.083685	0.109336	0.117967	0.0448596	0.0615205	0.00509431	0.0123924	0.00806463	0.0153074	0.0465327	0.020114	0.0139411	0.0382941	0.0053753	0.017355	0.00375617	0.033111	0.00811284	0.0102521	0.00970294	0.0266131	0.0183232	0.0131778	0.0245012	0.0214862	0.0653669	0.0150908	0.0078312	0.0369755
ACATACAATCAAGCGG-1	0.0545715	0.0113225	0.0464828	0.014468	0.0204344	0.0605788	0.056972	0.0759928	0.0663415	0.0300713	0.00252651	0.0199407	0.0141404	0.0140311	0.031264	0.0451984	0.0149925	0.038136	0.0229024	0.011008	0.00909106	0.0260978	0.00777211	0.0106888	0.0100039	0.0387232	0.0378069	0.00906152	0.0203268	0.0274815	0.0571796	0.0109478	0.0158366	0.067607
ACATCAGCTGGGACGC-1	0.213342	0.0505493	0.183581	0.0298072	0.00100281	0.00907491	0.000940759	0.00511472	0.023539	0.00345133	0.00107245	0.0219965	0.000985353	0.00337778	0.00834979	0.126889	0.00280497	0.119403	0.00041205	0.00112683	0.000508878	0.00790124	0.00176413	0.00124547	0.00151373	0.118116	0.000181661	0.000609588	0.00442505	0.000100509	0.0424297	0.00828159	0.000693737	0.005409
ACATCCCGGCCATACG-1	0.0212035	0.0100478	0.0174037	0.00266243	0.0142048	0.100402	0.0135085	0.0553949	0.176551	0.0337136	0.0120919	0.00528475	0.0112846	0.019608	0.027668	0.00204924	0.0226992	0.0162002	0.027641	0.0306708	0.0192026	0.0596082	0.0123739	0.0049042	0.0207294	0.00782752	0.0196172	0.0137503	0.0358352	0.0203491	0.0923143	0.0211588	0.0186987	0.0333407
ACATCCTGGTAACTGT-1	0.0259229	0.00898272	0.0225276	0.00562377	0.0168309	0.0940322	0.0858837	0.118261	0.0778108	0.0641523	0.00313105	0.0218654	0.0180509	0.0230601	0.0327409	0.0198298	0.0197232	0.00767372	0.0221761	0.0395004	0.0207476	0.0212494	0.00801782	0.0133866	0.0126101	0.0122783	0.0275186	0.00854754	0.018453	0.0182393	0.061291	0.0137067	0.0120611	0.0241139
ACATCGATCGTTTACC-1	0.0364413	0.034317	0.160781	0.0299926	0.0295176	0.0911007	0.0930669	0.142192	0.0274565	0.0273305	0.000835973	0.0105533	0.00480845	0.00686315	0.0204373	0.0451852	0.03327	0.0391907	0.0036965	0.00660605	0.00248547	0.0178199	0.00533736	0.00368026	0.00441365	0.0466019	0.00222618	0.00368907	0.0114186	0.001664	0.0261519	0.0131184	0.00347771	0.0142728
ACATCGCAATATTCGG-1	0.012358	0.00251261	0.00228275	0.00121203	0.00833338	0.0477856	0.133321	0.0660454	0.050582	0.054435	0.00443083	0.0638334	0.0274532	0.00474744	0.0750069	0.0296537	0.00814544	0.0417347	0.00530778	0.00448211	0.0230667	0.00472601	0.0114679	0.0492582	0.00653903	0.0104639	0.0806443	0.00958725	0.0102414	0.0410906	0.0205649	0.0113101	0.011685	0.0656919
ACATCGGTCAGCCGCG-1	0.00940404	0.00330968	0.00608832	0.0107862	0.0221805	0.0455268	0.073885	0.0637102	0.0444139	0.0333602	0.0131586	0.0500767	0.0274708	0.00307427	0.0545251	0.020095	0.00599404	0.031499	0.0079787	0.00674961	0.00249328	0.0103326	0.00522821	0.0347812	0.0181908	0.0142563	0.144197	0.0120868	0.0107181	0.0993265	0.01482	0.023597	0.0455843	0.0311013
ACATCGTATGCAATGG-1	0.0156337	0.00859733	0.038234	0.0167813	0.0284096	0.0930662	0.128219	0.144441	0.029182	0.0866179	0.00743284	0.00592319	0.0159298	0.0130567	0.0266766	0.033403	0.00996914	0.0470581	0.00238601	0.0179832	0.00833449	0.0346344	0.00415926	0.00468125	0.00453641	0.0266966	0.00315352	0.00367439	0.0145263	0.00247776	0.0888947	0.0121398	0.00422375	0.0188666
ACATCGTTAACCTAGT-1	0.0491305	0.000929946	0.00211598	0.000513825	0.0252864	0.0406454	0.0771302	0.0401024	0.0397025	0.19401	0.00813424	0.0413729	0.0192954	0.00691661	0.063961	0.00727561	0.00785172	0.0329103	0.0207421	0.00497503	0.0218716	0.0114025	0.00657102	0.0232897	0.0091237	0.00678418	0.0583898	0.00879239	0.00598041	0.0344574	0.0514762	0.013782	0.0116785	0.0533989
ACATCTCAACGCGTAA-1	0.0537671	0.00111481	0.000750185	0.00157257	0.00627183	0.00732503	0.0057077	0.00373593	0.0243963	0.0955975	0.0358537	0.0491772	0.0203744	0.00403427	0.0394024	0.0137414	0.00487879	0.028341	0.0105306	0.00725388	0.00774817	0.015489	0.0046774	0.0414901	0.0194522	0.0063904	0.181784	0.0127084	0.00551159	0.114075	0.0614917	0.0404255	0.0446293	0.0303007
ACATGGCGCCAAAGTA-1	0.0361834	0.00490779	0.00763644	0.0019343	0.0120442	0.0750371	0.0534341	0.0482411	0.0728093	0.0904939	0.0162481	0.0267634	0.0201439	0.012286	0.102998	0.00637096	0.0113934	0.0592424	0.0547801	0.0253256	0.0283445	0.0208582	0.0194718	0.0233016	0.00666168	0.00264318	0.00701076	0.0121945	0.0225304	0.00823659	0.059876	0.0137022	0.00815834	0.0287369
ACATTAGTTTATATCC-1	0.00312954	0.00401405	0.0218604	0.00416107	0.0113403	0.105337	0.0387041	0.0771884	0.0841699	0.038098	0.00408419	0.00751842	0.0428988	0.0261285	0.0505205	0.00213367	0.0694493	0.0402801	0.0425995	0.0630901	0.0173891	0.0344449	0.00888621	0.00304495	0.0100978	0.00817416	0.0010062	0.0100302	0.0229982	0.00218672	0.105241	0.0115738	0.00856031	0.0196613
ACATTCGCGCGGAATA-1	0.0451346	0.00517915	0.0137825	0.00170846	0.0199835	0.0798175	0.0882607	0.104561	0.110681	0.0596737	0.00294847	0.0209365	0.0184458	0.00800066	0.0216415	0.0156596	0.0111398	0.0334232	0.0133401	0.0206995	0.00857893	0.0180501	0.00745028	0.0126966	0.012301	0.0214124	0.0336133	0.0150107	0.018017	0.026243	0.0625973	0.0255708	0.0143181	0.0291233
ACCAAACACCCAGCGA-1	0.0991994	0.0388348	0.338292	0.0400646	0.000791563	0.0102871	0.00220959	0.00457035	0.0202776	0.0214221	0.0026995	0.0619091	0.0012883	0.00159844	0.00700508	0.0987011	0.00216728	0.0578363	0.000679974	0.000465995	0.00130274	0.00429515	0.00350549	0.00336662	0.00126374	0.133582	0.000487174	0.000460632	0.00391068	0.000230806	0.0249665	0.00587134	0.000891662	0.00556502
ACCAAACTAGAAATCC-1	0.266888	0.0416654	0.0989295	0.0184192	0.00392883	0.0139674	0.00277938	0.00916465	0.0261052	0.00772638	0.00222698	0.0540554	0.00333947	0.00228463	0.0081481	0.0862562	0.00411618	0.0446574	0.00641187	0.00136674	0.00294439	0.0139287	0.00337161	0.0113995	0.00791269	0.0685254	0.0430028	0.00415206	0.00818694	0.0305167	0.0652885	0.0120344	0.0127332	0.0135664
ACCAACACCACACACT-1	0.0528462	0.00426822	0.0120794	0.00312464	0.0167104	0.071846	0.172201	0.118143	0.0397065	0.132196	0.0173598	0.0301005	0.0104041	0.00840105	0.0233039	0.0238423	0.0091566	0.0253745	0.00583026	0.00533408	0.00324577	0.00685352	0.00470787	0.0229462	0.0040168	0.0274983	0.0155118	0.00352032	0.00712683	0.00862968	0.0736756	0.0111513	0.00414632	0.0247409
ACCAACCGCACTCCAC-1	0.00751978	0.00110691	0.00143047	0.000384359	0.00583651	0.0936141	0.0611353	0.0558031	0.18175	0.0252187	0.0019812	0.0221495	0.00709725	0.0106	0.0341346	0.00257806	0.0184727	0.0165471	0.0292965	0.0139392	0.0358201	0.0190227	0.0116484	0.0225637	0.0129921	0.00543405	0.0954359	0.0138845	0.0128174	0.0497886	0.0141189	0.0103875	0.0135527	0.0919384
ACCAACGCTTATTTAT-1	0.00522984	0.00338932	0.00604042	0.000962248	0.0132921	0.0939624	0.0732074	0.0934211	0.127202	0.0330893	0.00389752	0.012821	0.0164085	0.020417	0.0613171	0.00621099	0.0119386	0.037448	0.0862934	0.0265272	0.0342364	0.0241312	0.00700451	0.00989313	0.0109729	0.00907313	0.0202737	0.0104789	0.0171888	0.0199851	0.0516163	0.00743103	0.00964438	0.0349956
ACCAAGAACGCGTGTC-1	0.0546605	0.000596653	0.00111408	0.000492518	0.00416689	0.0119969	0.00275082	0.00783159	0.0977783	0.167901	0.0081676	0.0309265	0.017646	0.0546506	0.0251559	0.00283644	0.0119442	0.0176055	0.0349887	0.0161194	0.00575953	0.0182606	0.00758433	0.014416	0.0183227	0.00433552	0.0764005	0.0141872	0.0188616	0.0721982	0.0970845	0.0196044	0.021309	0.0423462
ACCAATATGCAAGTTA-1	0.020477	0.0151912	0.0220957	0.00310326	0.0272322	0.0969756	0.0197685	0.0838544	0.0984907	0.00943202	0.00336503	0.00212996	0.0118904	0.0258757	0.0598471	0.00421142	0.0348889	0.0160705	0.0333209	0.0283625	0.00846784	0.05821	0.00798887	0.00320537	0.0213973	0.0293995	0.022936	0.02021	0.0494412	0.0255059	0.0688044	0.0245022	0.0227932	0.0205551
ACCACAACTCAGAACA-1	0.044886	0.00307874	0.00585283	0.00128099	0.025095	0.0598456	0.1325	0.0847965	0.0883285	0.139004	0.00778108	0.0111422	0.00375422	0.0148547	0.0186664	0.00558364	0.00560806	0.0262122	0.00744778	0.00791717	0.00504687	0.0113296	0.00825497	0.0150271	0.00923605	0.0120916	0.0525643	0.00724291	0.010285	0.0499838	0.0667534	0.00701824	0.00975296	0.041778
ACCACAAGTTTCTATC-1	0.0273562	0.00364989	0.00720191	0.00263411	0.0127348	0.0766712	0.142024	0.120664	0.0555831	0.0921627	0.0049596	0.0275638	0.0151072	0.00851457	0.0417734	0.0237614	0.00536818	0.0239028	0.00963477	0.00637012	0.0154353	0.00922287	0.00639337	0.0244537	0.00735463	0.0264235	0.060363	0.0072063	0.0132426	0.0288443	0.0307614	0.0170113	0.0119129	0.0337369
ACCACACGGTTGATGG-1	0.0139133	0.0083338	0.0147275	0.00412518	0.0151722	0.125223	0.203667	0.202151	0.0377681	0.0633777	0.0015498	0.0122551	0.00397342	0.00371174	0.0329051	0.0421762	0.00895571	0.0276821	0.00146698	0.0084487	0.00111465	0.00983092	0.00276825	0.0109007	0.00313916	0.0386543	0.0141146	0.00302059	0.0107632	0.00793276	0.0324304	0.0111436	0.00443143	0.0181722
ACCACCAATGTAACAA-1	0.0442097	0.00178946	0.00306745	0.000474881	0.00907669	0.064505	0.0261996	0.0384677	0.115826	0.135721	0.00890428	0.0347737	0.0108685	0.0361292	0.0576854	0.00548471	0.0366723	0.0305315	0.0207946	0.0271338	0.0148315	0.0267967	0.0148342	0.0100012	0.00853105	0.00252814	0.00397472	0.0133469	0.0120984	0.0100952	0.110002	0.0100324	0.00783725	0.0467749
ACCACGTGCAGCTATA-1	0.00983455	0.009642	0.0379818	0.00521095	0.0250615	0.122378	0.0579564	0.108675	0.0932731	0.0429797	0.0117487	0.00251283	0.0186551	0.0380628	0.0233786	0.00496167	0.0413756	0.0237419	0.0306962	0.0199112	0.00943369	0.0221583	0.0129403	0.00360702	0.0122563	0.0087604	0.00340986	0.0116866	0.0221499	0.00524214	0.101809	0.00944269	0.0172405	0.0318261
ACCAGCCCGGTCTTTG-1	0.0228697	0.00144372	0.00135531	0.00492922	0.00941778	0.00890469	0.00331381	0.00472839	0.0221369	0.0532235	0.0319126	0.039182	0.0116773	0.00609364	0.0109576	0.0083894	0.00291714	0.0512009	0.0296271	0.00591785	0.00752162	0.0102871	0.00343328	0.0333574	0.0274912	0.0127277	0.208303	0.0144904	0.0146637	0.141671	0.0408215	0.0577809	0.0759982	0.021254
ACCAGGAGTGTGATCT-1	0.0415648	0.00536934	0.0136342	0.0122218	0.0157425	0.0210714	0.00522241	0.0141279	0.024551	0.039392	0.0178829	0.0184378	0.0109394	0.0126661	0.0276772	0.0133493	0.00590464	0.0223713	0.0267747	0.0112353	0.0021251	0.0244527	0.00442312	0.0374916	0.0305335	0.0167291	0.202233	0.016853	0.0125263	0.122589	0.0441258	0.0454148	0.0518819	0.0284858
ACCAGTGCCCGGTCAA-1	0.0109272	0.00280838	0.0128123	0.0028646	0.021985	0.0495782	0.132662	0.0554568	0.0515481	0.0783544	0.0227638	0.0573136	0.041192	0.00431503	0.0483311	0.0107752	0.00760816	0.0762155	0.00379271	0.00494602	0.0241067	0.00589042	0.0138291	0.0401262	0.00520082	0.0131424	0.0371193	0.00911378	0.010392	0.0216852	0.0495159	0.031472	0.014297	0.0278591
ACCAGTGCGGGAGACG-1	0.0164044	0.0115974	0.069759	0.0155949	0.0563292	0.109179	0.112553	0.158027	0.0274262	0.0343168	0.0032724	0.00534603	0.00919059	0.013985	0.0180621	0.0370894	0.0198662	0.0223063	0.00362135	0.0111462	0.00491982	0.0438509	0.0063285	0.00620786	0.00567125	0.0415187	0.00602068	0.00548266	0.023637	0.00434081	0.0473655	0.025195	0.00783785	0.0165514
ACCATATCCGCAATAA-1	0.0263858	0.0022793	0.00668288	0.00178953	0.00884938	0.0871479	0.0712561	0.0865919	0.166052	0.0567252	0.00207147	0.0131263	0.0249052	0.0092558	0.0487959	0.00449437	0.0107746	0.0195921	0.032156	0.0039324	0.00928951	0.0218773	0.0112323	0.0151246	0.0131135	0.00856202	0.0601712	0.0122244	0.0413371	0.0297495	0.0264045	0.00601487	0.0141344	0.0479005
ACCATCCGCCAACTAG-1	0.0055756	0.00867035	0.0189196	0.00297194	0.0171612	0.107146	0.232636	0.164581	0.0192392	0.0586153	0.00104826	0.0161466	0.0100045	0.012615	0.0303942	0.0179299	0.00542004	0.0313459	0.012006	0.00573215	0.00186068	0.0108012	0.00436928	0.0170588	0.0036376	0.0657138	0.0134206	0.00320153	0.0157316	0.00578229	0.0322654	0.017083	0.00678815	0.0241277
ACCATCGTATATGGTA-1	0.0467385	0.0145171	0.0273842	0.0079647	0.0192949	0.0808724	0.197596	0.168978	0.0124573	0.0673264	0.00115318	0.0463436	0.00752903	0.00582998	0.0138259	0.0431702	0.00152304	0.028416	0.00153624	0.00107347	0.00167687	0.00245526	0.0028278	0.0250013	0.0037074	0.0410939	0.0523551	0.00297951	0.00858585	0.0216986	0.0100906	0.0116836	0.00792335	0.01439
ACCCAACGCCCGTGGC-1	0.0468131	0.00448003	0.0128957	0.00314787	0.0126102	0.0492325	0.00625732	0.0272929	0.0670204	0.0773935	0.0166558	0.0148513	0.023972	0.0322907	0.033719	0.0018275	0.0263625	0.0139056	0.0634478	0.0258703	0.0121645	0.0656465	0.00943393	0.0128757	0.0179533	0.00933614	0.0572805	0.0139102	0.0248709	0.0431213	0.0991269	0.0219457	0.0220363	0.0302521
ACCCACCTACATGCTC-1	0.00119069	0.0100545	0.024988	0.00466279	0.0269381	0.0820659	0.0963613	0.130391	0.019729	0.026277	0.0130624	0.00683787	0.00769673	0.00916333	0.0432336	0.0166646	0.0183107	0.0348533	0.00565123	0.019554	0.00227882	0.028734	0.00456615	0.0132367	0.0140626	0.0426549	0.0473599	0.00824611	0.02292	0.0284779	0.0483012	0.0416934	0.0753889	0.0243937
ACCCATCTTGAGGGTA-1	0.0207485	0.00586526	0.00583356	0.00616609	0.0160458	0.0613735	0.193216	0.152827	0.0138742	0.0579185	0.00188972	0.0284761	0.0017958	0.00342417	0.0185517	0.0230304	0.000924795	0.0244682	0.0101761	0.00174877	0.000926585	0.00202952	0.00206489	0.0315542	0.00868875	0.033675	0.117281	0.00569452	0.00938479	0.0621928	0.00926463	0.016456	0.0249534	0.0274805
ACCCATTTGTCCCTCT-1	0.0165228	0.0054177	0.00497404	0.00192055	0.0113625	0.0741852	0.11838	0.0951138	0.0713333	0.0294326	0.00683522	0.0378053	0.00788084	0.0216512	0.0361192	0.0084132	0.0167228	0.0276277	0.0166937	0.00713541	0.0253788	0.015053	0.00812461	0.027847	0.0125145	0.0123263	0.0905255	0.0121611	0.0136838	0.0567317	0.019658	0.0168587	0.0221422	0.0514675
ACCCGAGCGAAATTAC-1	0.00580557	0.0118848	0.0153588	0.00535107	0.0132244	0.0665126	0.0293732	0.0631917	0.0323205	0.0242193	0.0105569	0.0231799	0.0350278	0.0326747	0.0505429	0.00416768	0.0219905	0.035847	0.0588012	0.0269907	0.0120673	0.0460773	0.0114631	0.0225917	0.0221555	0.0122954	0.0738527	0.0175205	0.0305958	0.0600136	0.0319094	0.0203821	0.0296068	0.0424476
ACCCGATTGGTTCCGA-1	0.042421	0.00986888	0.0299817	0.00657671	0.021307	0.0525526	0.0173828	0.0383488	0.0381062	0.0484081	0.0147996	0.016858	0.0064228	0.02903	0.0399704	0.00498057	0.0217093	0.0173096	0.0280397	0.0111087	0.0101969	0.0282192	0.00797876	0.019584	0.0207145	0.0135374	0.124829	0.0137242	0.0172274	0.0847682	0.0636034	0.0250543	0.03904	0.0363404
ACCCGGAAACTCCCAG-1	0.00602675	0.00912333	0.0177121	0.00230271	0.0148745	0.106043	0.0683362	0.0840581	0.111051	0.016941	0.00472701	0.00619496	0.038376	0.0400576	0.0311214	0.00344179	0.0451218	0.0376596	0.0342886	0.0346863	0.0206481	0.0471375	0.0153125	0.00513171	0.0116751	0.00999691	0.00299545	0.0129591	0.0275282	0.00426159	0.0569278	0.0151993	0.00955214	0.0485311
ACCCGGATGACGCATC-1	0.0526327	0.00268756	0.00740061	0.00538179	0.0163334	0.0796061	0.0223727	0.0804766	0.0516123	0.107714	0.00945744	0.0171235	0.0128533	0.0202507	0.0655029	0.000403943	0.0222251	0.0138381	0.0672185	0.0480687	0.00631361	0.0146076	0.00608854	0.0109445	0.0129814	0.00725551	0.0511345	0.00886899	0.01228	0.037635	0.0710324	0.0155326	0.016248	0.0259178
ACCCGGTTACACTTCC-1	0.00580218	0.00954711	0.0124912	0.00443891	0.0313765	0.0881997	0.212155	0.162038	0.0160925	0.0562081	0.00408737	0.0295533	0.0123564	0.00352263	0.0267504	0.0610534	0.00303142	0.0512978	0.00326029	0.00448472	0.00400315	0.00621507	0.00960473	0.0207312	0.00257889	0.0585463	0.0121056	0.00335446	0.0144108	0.00496495	0.0182509	0.0152769	0.00562509	0.0265844
ACCCGTAGTCTAGTTG-1	0.0200586	0.00413933	0.00752809	0.00168752	0.0158518	0.0934401	0.159815	0.133701	0.0729427	0.0830924	0.00155637	0.0171695	0.010768	0.0142855	0.0384887	0.0210486	0.012358	0.0360689	0.00814472	0.0175941	0.0154228	0.0186281	0.00608447	0.0123648	0.00475061	0.0194977	0.0119172	0.00608998	0.0147375	0.00695997	0.0442177	0.00838614	0.00523803	0.0559658
ACCCGTGTCATCAGTA-1	0.000602651	0.0244157	0.0269531	0.00501628	0.0171013	0.145053	0.119963	0.20724	0.0671316	0.0267082	0.00289961	0.00227778	0.00552225	0.0228543	0.0212226	0.030045	0.00793694	0.0120471	0.0100929	0.0265535	0.00967036	0.028907	0.00571164	0.00364169	0.00702938	0.0385663	0.00300922	0.0047524	0.0289977	0.00206891	0.0432014	0.0108026	0.00782356	0.0241809
ACCCTATAGGACTGAG-1	0.0953117	0.0311947	0.0466099	0.0124168	0.0128942	0.05183	0.124998	0.0878666	0.0326873	0.0314585	0.00305899	0.0653158	0.00800062	0.00263154	0.0256115	0.0432164	0.00483032	0.0297293	0.0104723	0.00221851	0.0028089	0.00507324	0.00258534	0.0192524	0.00820768	0.0395458	0.0768572	0.00474479	0.00695776	0.0388179	0.0137954	0.0146618	0.0174783	0.0268607
ACCCTATGCCATATCG-1	0.00220003	0.00731472	0.0286352	0.00194405	0.0202789	0.139109	0.0306866	0.107621	0.0998609	0.0139382	0.00445384	0.000659414	0.0092771	0.0260192	0.0617968	0.001557	0.0210736	0.0332667	0.0421622	0.0473708	0.0194807	0.0629302	0.00943416	0.0016647	0.0160189	0.0106986	0.00131526	0.0150231	0.036224	0.00408519	0.0638595	0.0124462	0.0104673	0.0371275
ACCCTCCCTTGCTATT-1	0.0056003	0.00868214	0.0465649	0.0172057	0.0247923	0.0994973	0.0241788	0.0783881	0.0466069	0.0291103	0.00960254	0.00130335	0.0147959	0.0140308	0.122699	0.00646586	0.0254642	0.0235543	0.00933816	0.0217977	0.0118462	0.0746077	0.0100064	0.00241702	0.0189172	0.0120501	0.00418279	0.0197136	0.0400019	0.00675015	0.101366	0.0226167	0.014054	0.0317918
ACCCTGGTAACGCCCT-1	0.239111	0.149429	0.0797399	0.0165432	0.00449547	0.0515569	0.0135495	0.0430654	0.024019	0.00314874	0.00138832	0.0293417	0.00265465	0.00656831	0.0157859	0.0528783	0.0180668	0.065817	0.0100126	0.00973121	0.00313605	0.0106531	0.00531075	0.00415244	0.00391489	0.0508346	0.00152426	0.00355663	0.0102303	0.00198611	0.0411133	0.0052507	0.00332582	0.0181084
ACCCTTCATCTGCGAA-1	0.148175	0.0262841	0.13022	0.0197963	0.0323093	0.0502797	0.0612491	0.0891497	0.0147085	0.0509643	0.00178793	0.0183261	0.00845894	0.00450898	0.0124219	0.0714172	0.00818331	0.035303	0.0011605	0.00936429	0.00131204	0.0170104	0.00326329	0.00395336	0.00301697	0.0806031	0.00211723	0.00260868	0.0116654	0.00113966	0.0460658	0.0106307	0.00377123	0.0187746
ACCCTTTAGTTCTCCA-1	0.0144249	0.00275355	0.00474427	0.00139425	0.0193697	0.0540691	0.0561442	0.027977	0.0298465	0.109367	0.0361191	0.0527625	0.0791064	0.0188349	0.0272693	0.00689205	0.0404863	0.0518405	0.00393051	0.0207743	0.0202428	0.012614	0.012245	0.0484052	0.0120252	0.00324631	0.0500569	0.0120364	0.00834842	0.0300784	0.0612586	0.012019	0.014726	0.0445916
ACCGAAAGGGCCCTGC-1	0.0197815	0.0106226	0.0120923	0.00797481	0.0134941	0.0584806	0.13433	0.0950667	0.0154049	0.0568142	0.00856104	0.0327448	0.0182801	0.0219562	0.0424221	0.027465	0.0116477	0.0582675	0.00402508	0.0118587	0.00846637	0.0105922	0.00744736	0.0309636	0.0109535	0.0275321	0.0605858	0.0107719	0.0116852	0.0401129	0.0419289	0.0215142	0.0204703	0.0356854
ACCGAAGAGTCTGGTT-1	0.0136702	0.0147106	0.0148739	0.00302843	0.034592	0.0866085	0.182504	0.170818	0.0141521	0.0657437	0.00180065	0.0205754	0.00769295	0.0124932	0.0163822	0.0152269	0.00737391	0.0138786	0.00611244	0.00656347	0.00461478	0.011618	0.00597019	0.0228597	0.00705454	0.0472131	0.0428784	0.005006	0.0187561	0.0210147	0.0531163	0.0184909	0.01484	0.0177663
ACCGACACATCTCCCA-1	0.0125195	0.00639546	0.0186052	0.00273911	0.0166739	0.0851953	0.0741705	0.0930282	0.0616166	0.0373807	0.00541017	0.00595597	0.0109788	0.0294833	0.0250935	0.010882	0.0211991	0.0350171	0.0178291	0.0296717	0.00428256	0.0339966	0.00499304	0.0097127	0.0271775	0.0452788	0.0473783	0.0168995	0.0230008	0.0414848	0.0573206	0.0345995	0.0268471	0.0271828
ACCGACTGAGTCCCAC-1	0.0133503	0.007462	0.021921	0.00336609	0.0182525	0.0994307	0.0812437	0.113	0.0673434	0.0798758	0.008531	0.00971783	0.0115953	0.0198777	0.0198668	0.0115261	0.0193439	0.0108084	0.0131775	0.0350956	0.00989902	0.0302944	0.00663379	0.00630665	0.013248	0.0439527	0.0128548	0.00801659	0.017084	0.0117482	0.106293	0.0256575	0.0147327	0.0284925
ACCGAGTCTCCTTATT-1	0.0111042	0.00434023	0.0120345	0.00241688	0.017613	0.0824592	0.18854	0.156584	0.0366103	0.0746926	0.00306108	0.0189092	0.0203344	0.00395128	0.0344698	0.0460135	0.00573528	0.0364718	0.00400826	0.00674256	0.00422556	0.00867864	0.00478425	0.0197527	0.00538145	0.0408581	0.0407526	0.00437856	0.0112358	0.0180708	0.0276222	0.0115322	0.00970381	0.0269319
ACCGATAGGCATAACC-1	0.0384876	0.00255586	0.00448219	0.00183973	0.0135814	0.0678326	0.18312	0.137873	0.011315	0.192796	0.00253014	0.0486638	0.00774598	0.00234714	0.0279384	0.0497486	0.00293804	0.0273638	0.00761411	0.0041135	0.000750734	0.00730758	0.00839949	0.0198492	0.00128757	0.0196538	0.0157575	0.00294085	0.0147913	0.00769396	0.0417257	0.00768031	0.00265997	0.0146146
ACCGATGGTAGCATCG-1	0.0202929	0.00513768	0.00590073	0.010888	0.0148486	0.016257	0.002896	0.011775	0.0161943	0.0206996	0.0309165	0.0109018	0.00282577	0.0101353	0.0117336	0.00383066	0.0059901	0.0113653	0.015386	0.00708853	0.00287556	0.0193923	0.00287107	0.0325984	0.0385301	0.0162341	0.231487	0.0158014	0.0146903	0.13191	0.0913304	0.0791153	0.0619009	0.0262
ACCGCAATAACTGCCT-1	0.0319474	0.00459672	0.0096555	0.00122504	0.0356206	0.11439	0.02383	0.0890763	0.146695	0.0581711	0.00376484	0.00340329	0.0123718	0.0296307	0.0308119	0.000856696	0.0293893	0.00763732	0.0321914	0.0342544	0.0241194	0.045365	0.0114652	0.0039802	0.0150673	0.0040948	0.00342892	0.0170293	0.0342255	0.00858876	0.087871	0.00666489	0.00873469	0.0298452
ACCGCGGTGGAAGTCG-1	0.0636938	0.0300003	0.0690146	0.0501794	0.0151321	0.0793207	0.0172563	0.0682578	0.0546112	0.0159087	0.00995464	0.0118313	0.00461341	0.0213441	0.0498228	0.0258882	0.0102955	0.0194706	0.0283437	0.0085014	0.0122553	0.0422239	0.00684854	0.0106075	0.019845	0.029675	0.03946	0.0135808	0.0225842	0.022735	0.0544102	0.0148034	0.0229248	0.0346061
ACCGCTAGTCATTGGT-1	0.0196082	0.0082185	0.0197181	0.0081401	0.0113702	0.0417181	0.0481437	0.034573	0.0265964	0.0414748	0.0427232	0.0458753	0.0223991	0.0109969	0.0312311	0.0237976	0.0120862	0.0502031	0.0106395	0.00755325	0.0116518	0.0167936	0.0113562	0.0446113	0.0179932	0.0155705	0.113346	0.0177311	0.0155238	0.075815	0.0372954	0.0267186	0.0342061	0.0443207
ACCGGGCCTTTGTTGA-1	0.00374816	0.00433142	0.0182306	0.00200971	0.10519	0.06527	0.00831816	0.0438799	0.0799568	0.0184229	0.022714	0.00439346	0.0195727	0.0160658	0.0334859	0.00125435	0.0159079	0.00640473	0.0352007	0.0230502	0.014481	0.0388665	0.00940968	0.0117096	0.0190696	0.0110767	0.0667205	0.0169805	0.0268156	0.0615706	0.0998704	0.0276319	0.0301169	0.0382726
ACCGGTCAGGTACACC-1	0.0176057	0.00816483	0.0217293	0.00626193	0.0205306	0.0726964	0.0762981	0.103632	0.0342873	0.0560325	0.00537832	0.0269014	0.0172077	0.0192017	0.0389547	0.00365542	0.00925948	0.0173765	0.0478944	0.0133766	0.00385094	0.0252818	0.0107041	0.0195011	0.0136645	0.0143233	0.0900397	0.0104121	0.0227586	0.0637058	0.0390229	0.0140358	0.0302778	0.025977
ACCGGTCTGAGTACGG-1	0.0631745	0.00906303	0.0409842	0.00508483	0.11674	0.0361319	0.0598248	0.052835	0.0410031	0.104289	0.00548986	0.043853	0.0144401	0.00525061	0.025848	0.0489633	0.00492472	0.0480272	0.00699754	0.00523814	0.00539712	0.0120288	0.00461906	0.0144358	0.0083076	0.0197375	0.0391132	0.00621269	0.0114676	0.0281745	0.0481776	0.0266743	0.0135142	0.0239781
ACCGTCCACTGGGCCC-1	0.00292592	0.00291436	0.0126451	0.0040375	0.0473181	0.114659	0.199543	0.166832	0.0217963	0.0530236	0.0159202	0.0417162	0.0424038	0.00370345	0.0460386	0.00863175	0.00564736	0.026586	0.00966564	0.0119588	0.00380692	0.0123146	0.00317817	0.00756839	0.00508712	0.0114128	0.0257254	0.00561987	0.0164372	0.0110481	0.0344373	0.00673598	0.00688344	0.0117776
ACCGTGACCACGTGGG-1	0.00335547	0.00377969	0.00865316	0.00985934	0.0574982	0.0336079	0.0130266	0.0275558	0.0362065	0.0112871	0.0390141	0.0155535	0.012991	0.0139992	0.0139669	0.0035621	0.0149093	0.0289154	0.0232946	0.0063458	0.00208443	0.0282537	0.00594859	0.0265024	0.0323077	0.0439379	0.119673	0.0210726	0.0346702	0.0824981	0.0632675	0.0571556	0.080355	0.0248911
ACCGTTCCCGCTCTGA-1	0.26092	0.0387486	0.130247	0.0389419	0.00919229	0.0361737	0.00422942	0.0220032	0.0276898	0.0266882	0.00154501	0.0215942	0.00898509	0.00362282	0.0084004	0.0697318	0.0106112	0.0550471	0.010627	0.0070182	0.0027605	0.0172637	0.00527851	0.00153364	0.0035772	0.0612941	0.000470254	0.00199142	0.00958021	0.000648065	0.0729247	0.0075609	0.00278267	0.0203177
ACCTAAGTACCTTTCA-1	0.00226198	0.0128573	0.0262442	0.0131654	0.0266741	0.136593	0.0737601	0.165235	0.0624607	0.0180488	0.011551	0.00391112	0.00617059	0.0353272	0.0266351	0.00464572	0.0430755	0.010265	0.0190389	0.0350036	0.0111108	0.0463922	0.00534815	0.00217614	0.0103026	0.0257283	0.00194451	0.00822341	0.0298661	0.00320057	0.0669297	0.0150602	0.0109879	0.0298055
ACCTAATCGACTTCCT-1	0.00885112	0.0011427	0.000718726	0.00204956	0.00409858	0.0125422	0.0153792	0.00601655	0.0233208	0.0334274	0.0179562	0.0607799	0.00500186	0.0102755	0.147565	0.0035229	0.00371165	0.0539107	0.00991197	0.0075453	0.0125432	0.0117798	0.0074774	0.0429454	0.0167872	0.00687326	0.210834	0.0126599	0.0103939	0.123647	0.0232978	0.0190216	0.0414221	0.0325904
ACCTACAGTATGTGGT-1	0.00269801	0.0126685	0.0152212	0.00278935	0.0135072	0.119956	0.0315553	0.0760212	0.0775328	0.0208758	0.0095998	0.0156674	0.0208528	0.0243363	0.0604258	0.00397504	0.0244315	0.0296831	0.0565407	0.0596028	0.0160286	0.0439003	0.0165362	0.00722714	0.0203663	0.00479272	0.0180032	0.0136229	0.0353954	0.0215161	0.059349	0.00971739	0.0159274	0.0396762
ACCTACTATAAATCTA-1	0.0378255	0.00254647	0.00300134	0.00102791	0.00935803	0.0690005	0.0692503	0.0487089	0.104509	0.0761835	0.00340868	0.0429763	0.0323194	0.0346913	0.0843721	0.00587704	0.0100867	0.0261425	0.0277354	0.0104113	0.0288897	0.0187827	0.0158129	0.0282604	0.00952233	0.00465412	0.0314473	0.0108027	0.0196448	0.0270498	0.0293556	0.00855947	0.00894659	0.0588393
ACCTCCGCCCTCGCTG-1	0.0565204	0.00771961	0.0170437	0.00634213	0.0181823	0.0802546	0.129776	0.119729	0.0339768	0.0516193	0.00281637	0.0325453	0.0188798	0.00776376	0.0211682	0.0301587	0.00395588	0.0309897	0.0232697	0.00433677	0.00403378	0.0102104	0.00529423	0.0268045	0.00819407	0.0240075	0.0766797	0.00665658	0.0117731	0.0385391	0.0265942	0.0169339	0.0166562	0.0305742
ACCTCCGTTATTCACC-1	0.0382918	0.0104095	0.0242199	0.00475052	0.0115884	0.0798726	0.113042	0.0912509	0.0377672	0.0622756	0.0104292	0.0210202	0.0130997	0.0160366	0.0515397	0.0183629	0.0143926	0.0413288	0.0158788	0.0110365	0.0148808	0.0157914	0.00761193	0.0210976	0.0107491	0.0224724	0.0527439	0.00952191	0.0136528	0.0286268	0.0443955	0.0193693	0.0154963	0.0369965
ACCTCGAACTTATGCT-1	0.145453	0.0483448	0.172088	0.0445393	0.00258757	0.0203813	0.00407308	0.0130683	0.044565	0.00921083	0.00189429	0.0338158	0.00142195	0.0116636	0.00983297	0.119921	0.00504762	0.0737031	0.00244017	0.00258869	0.00156127	0.00941709	0.00233544	0.00148642	0.00273747	0.148618	0.000467296	0.00140485	0.00673436	0.000482817	0.0367599	0.0102741	0.00270591	0.00837443
ACCTGCGTGTCATGTT-1	0.00418223	0.00707315	0.0427977	0.0108285	0.012505	0.133844	0.0274084	0.134267	0.0997584	0.0281493	0.00640321	0.0019171	0.0161885	0.0298271	0.0510388	0.00349754	0.034983	0.0312475	0.0119428	0.0243701	0.0166254	0.0500196	0.00635678	0.00167987	0.0114107	0.0102249	0.000988376	0.010528	0.0240925	0.00250622	0.0919996	0.0217576	0.0114361	0.028145
ACCTTTCCTTTAGAAG-1	0.100325	0.00772445	0.0196448	0.00447357	0.0104108	0.0328711	0.0702655	0.0591462	0.0173329	0.0823572	0.00400741	0.0326954	0.00470791	0.00407787	0.00954316	0.043275	0.00156871	0.0487588	0.00420696	0.000822604	0.000852311	0.00394613	0.00262039	0.0365575	0.0125275	0.0345714	0.142083	0.00582546	0.0063723	0.0758156	0.0374382	0.0341055	0.0261484	0.0229209
ACGAAATGGGCGGCAC-1	0.0413639	0.00218666	0.00781482	0.00179719	0.00929622	0.0501497	0.0309731	0.0269563	0.0769174	0.127936	0.00832218	0.0214936	0.020602	0.0363097	0.0683034	0.00402129	0.0123921	0.0492491	0.0432892	0.0280514	0.0313369	0.016694	0.0151491	0.0285009	0.0126311	0.00406545	0.0256174	0.0115299	0.0156471	0.0225162	0.0899468	0.0105627	0.00894491	0.0394319
ACGACTCTAGGGCCGA-1	0.0940096	0.0261947	0.0859571	0.00954919	0.00647426	0.074071	0.0161437	0.0527834	0.170876	0.0157815	0.00837226	0.00589082	0.00453568	0.00808432	0.0388228	0.0286218	0.0114466	0.0269	0.00787214	0.022196	0.00387065	0.0312912	0.00640293	0.002058	0.0110243	0.0586571	0.00121885	0.00812101	0.0231439	0.00227888	0.070111	0.0180242	0.0106409	0.0385743
ACGACTGGTCATACTC-1	0.00754643	0.00243959	0.0052019	0.00228625	0.0572343	0.0353916	0.0216038	0.0291707	0.0304333	0.0212535	0.032945	0.0129514	0.00998559	0.00958493	0.0208997	0.0168175	0.0150501	0.0400655	0.011209	0.0148628	0.00458328	0.0243376	0.00713689	0.0351843	0.0303882	0.0139242	0.153519	0.0199975	0.0226158	0.106291	0.0560193	0.0471678	0.0559871	0.0259153
ACGAGAACCCATCACG-1	0.00608035	0.00157432	0.00128429	0.00904837	0.0147602	0.00756949	0.00278155	0.00606362	0.0150145	0.0139678	0.0250929	0.0175238	0.00105834	0.00612666	0.00973937	0.00527985	0.00343446	0.0164841	0.0271129	0.00215393	0.000436948	0.0113955	0.00234985	0.0403991	0.0383372	0.0209973	0.309479	0.0150099	0.0111195	0.196429	0.0157843	0.0489409	0.0761219	0.0210491
ACGAGATATTTGCTTA-1	0.0369701	0.00578341	0.0122963	0.00211565	0.0428651	0.0848565	0.155177	0.156762	0.0256103	0.0868268	0.00472832	0.00805924	0.00251378	0.0122783	0.0140752	0.010787	0.00397893	0.0208111	0.0129058	0.00958739	0.0044237	0.0110493	0.00357343	0.0247338	0.00866805	0.0306703	0.0601154	0.00868611	0.0119767	0.0364877	0.0261125	0.0289768	0.0165697	0.0189677
ACGAGGATACCACTCT-1	0.00104707	0.00364014	0.026762	0.00175469	0.0222639	0.121683	0.028396	0.113202	0.125102	0.0155762	0.00147587	0.00340741	0.0290515	0.0469576	0.0334301	0.00232424	0.0246886	0.0167731	0.0231151	0.028801	0.0158175	0.0462465	0.019131	0.00608499	0.0191382	0.00769959	0.00987676	0.0170914	0.0503828	0.0213865	0.0641773	0.0126596	0.0105782	0.0302786
ACGAGGTTTACAACGT-1	0.0124194	0.00673437	0.0148084	0.00725245	0.0208805	0.0876617	0.129712	0.160835	0.0205906	0.0950467	0.00305531	0.00990283	0.008091	0.0171316	0.0232027	0.00933099	0.0158372	0.0243805	0.0145177	0.00746161	0.0049823	0.0249545	0.00589338	0.0143977	0.00897728	0.0447703	0.0369352	0.00860457	0.0157008	0.0206841	0.0486717	0.0299296	0.0179225	0.0287238
ACGAGTACGGATGCCC-1	0.0240681	0.0146483	0.0523839	0.00891206	0.0344792	0.0721879	0.0763342	0.0811949	0.0219916	0.0313352	0.0113544	0.0141759	0.0254689	0.0110633	0.0326283	0.0332036	0.0145051	0.039589	0.0138327	0.0175106	0.00475967	0.033188	0.00873584	0.0104998	0.0140376	0.0467011	0.0319345	0.00998799	0.0292387	0.0225233	0.0712843	0.0296899	0.0212126	0.0353396
ACGATACATAGAACTA-1	0.066125	0.00102332	0.00273861	0.000775116	0.0146367	0.0226341	0.00381198	0.0121677	0.135664	0.186242	0.00811228	0.017738	0.0111642	0.0178776	0.0418286	0.00350439	0.0238836	0.00816665	0.0315554	0.0189614	0.01696	0.0340175	0.00722718	0.00681351	0.0103577	0.00229178	0.0102971	0.00929735	0.0172809	0.0325632	0.172527	0.0103624	0.00722178	0.0341718
ACGATCATACATAGAG-1	0.0193749	0.0141182	0.0283995	0.0099322	0.0319244	0.0800989	0.0641441	0.0734854	0.0448834	0.0460904	0.0176239	0.0112253	0.0133311	0.0208154	0.0451535	0.0195626	0.0166164	0.0307554	0.0223508	0.0219865	0.00982564	0.0613872	0.00656952	0.0128187	0.0155846	0.0293495	0.0297872	0.0115059	0.0206354	0.0280939	0.0706723	0.0164512	0.0180989	0.0373473
ACGATCATCTTGTAAA-1	0.0139308	0.00269902	0.00245436	0.00450708	0.0104274	0.0122573	0.00284615	0.00730362	0.015497	0.0167113	0.0315944	0.0220479	0.0023698	0.0129532	0.0141788	0.00895428	0.00601092	0.0205502	0.0155554	0.00350646	0.00701892	0.0205017	0.00471077	0.0499256	0.0330845	0.0144061	0.240728	0.0199825	0.0155582	0.157091	0.0445849	0.0795497	0.0684193	0.0180827
ACGATGCATATGTTAT-1	0.0609796	0.0181253	0.0550663	0.0117582	0.0173747	0.0831138	0.174039	0.161651	0.0209263	0.0513775	0.00262485	0.029884	0.00324229	0.00615701	0.0105264	0.0794422	0.00299666	0.0314872	0.00557665	0.00298505	0.00146124	0.00623848	0.00293666	0.0101288	0.00210702	0.0652014	0.00682871	0.00195466	0.0125403	0.0020847	0.031419	0.0100429	0.00262157	0.0151007
ACGATGGATCCGATGC-1	0.0233768	0.00249366	0.00414984	0.00166051	0.015548	0.0560724	0.141737	0.0779696	0.0539269	0.083177	0.00471177	0.0440413	0.0206282	0.0164548	0.0481937	0.0187607	0.00433852	0.0767534	0.00510421	0.00878742	0.0166684	0.00648406	0.00712373	0.0338723	0.00620631	0.0125972	0.0556371	0.00662614	0.00908505	0.0273611	0.0288344	0.0237048	0.0104387	0.0474749
ACGCAAACTAATAGAT-1	0.0310636	0.0186074	0.0323339	0.0107468	0.0116265	0.094708	0.125928	0.146457	0.0204017	0.0261954	0.00475115	0.0136627	0.00674081	0.0149614	0.0238128	0.0235868	0.00825901	0.0220862	0.0173095	0.0101501	0.00164408	0.0164426	0.00577608	0.0192458	0.0156549	0.0579958	0.0570959	0.00810569	0.0207436	0.0337205	0.0311981	0.0159937	0.0239633	0.029031
ACGCAATCACTACAGC-1	0.154939	0.0469661	0.245106	0.0341663	0.00499661	0.033711	0.00523809	0.0205195	0.015123	0.00818306	0.00230521	0.0224318	0.00107793	0.00289307	0.00644828	0.0918165	0.00726056	0.0352153	0.00118471	0.0097929	0.0021042	0.0156009	0.00449696	0.00200695	0.00443699	0.13126	0.00064662	0.0024059	0.0092261	0.000717433	0.0525537	0.0119504	0.00283294	0.0103865
ACGCATAAATGACATG-1	0.0177233	0.00444566	0.00865811	0.00366507	0.0231919	0.0687012	0.203366	0.133096	0.0273396	0.112281	0.00650195	0.0360558	0.00863373	0.0053801	0.0284249	0.0323067	0.00321246	0.0324507	0.00315243	0.00428341	0.00408485	0.0133672	0.00563114	0.0226648	0.00378312	0.0339771	0.0301193	0.00431449	0.0122357	0.0157951	0.0392138	0.0225291	0.0080235	0.0213907
ACGCATACGTTTACTA-1	0.0222991	0.0203924	0.0447327	0.00672425	0.0118571	0.0383909	0.0126453	0.0241884	0.0197596	0.0351147	0.0274809	0.0234606	0.00753614	0.0170859	0.033959	0.0492442	0.0277473	0.0318293	0.00665153	0.00866662	0.00259802	0.035004	0.0116734	0.0244415	0.0229084	0.0271679	0.114719	0.0162861	0.0230787	0.0829329	0.042969	0.0539811	0.0364243	0.0360499
ACGCCACTCGAAACAG-1	0.00833779	0.0166046	0.00801267	0.00412702	0.0107063	0.0727051	0.0465488	0.0477015	0.0882706	0.0417731	0.0196666	0.0278885	0.035648	0.0216883	0.0787538	0.00807181	0.00978065	0.0389514	0.0143857	0.0145507	0.0291519	0.0231621	0.0101907	0.0238049	0.0150708	0.00741623	0.0560454	0.0164945	0.024612	0.0405271	0.0311829	0.0142739	0.0229555	0.0709392
ACGCCAGATGATTTCT-1	0.0038299	0.000801256	0.00265852	0.000811464	0.263876	0.0077123	0.00704998	0.00372986	0.0546212	0.0157977	0.0246375	0.0447446	0.0376494	0.0162326	0.0325103	0.00981011	0.0078928	0.0527685	0.0203419	0.0142333	0.0770964	0.0531464	0.0149849	0.00703408	0.00499496	0.000787805	0.000675979	0.0088158	0.0314363	0.0010107	0.118328	0.02222	0.00570204	0.0320577
ACGCCCAGCTGTCGAT-1	0.0180617	0.00289313	0.00716343	0.0107779	0.0125886	0.00935859	0.00272044	0.00725741	0.0224851	0.0215218	0.0408214	0.0274444	0.00250324	0.0108292	0.0113658	0.0145754	0.0039105	0.019877	0.0272467	0.00329033	0.00194367	0.0148941	0.00418867	0.0452958	0.035002	0.0164154	0.207851	0.0273877	0.0169645	0.145562	0.0486292	0.0663063	0.0778455	0.0150225
ACGCCGCTAGACGACC-1	0.237291	0.0455128	0.191816	0.0541297	0.000911904	0.00688808	0.000605811	0.00421219	0.0237334	0.00116034	0.000823947	0.0167297	0.000663878	0.0161298	0.0179703	0.12865	0.00841218	0.0631293	0.000941507	0.00751565	0.000980097	0.0157375	0.00260686	0.000575839	0.00130014	0.0998713	8.35358e-05	0.000857052	0.00675241	8.33952e-05	0.0323184	0.0044204	0.000843759	0.00634235
ACGCGAAGTCAGACGA-1	0.00485804	0.00625709	0.0247143	0.00918372	0.0139697	0.135524	0.0283429	0.108709	0.074879	0.0226905	0.00613	0.00220179	0.0261938	0.0543517	0.0485188	0.00249273	0.0334539	0.0291363	0.0597102	0.0439071	0.0114533	0.0393098	0.00734116	0.00138342	0.0105661	0.0082269	0.000746337	0.0106595	0.0343404	0.00228347	0.0817247	0.018664	0.00771152	0.0303644
ACGCGCTACACAGGGT-1	0.00314932	0.00198507	0.000753938	0.00277756	0.00820894	0.0155974	0.0154077	0.0117337	0.0253645	0.0280644	0.0271438	0.0234186	0.002909	0.00544801	0.00506311	0.00680635	0.00431533	0.0415613	0.0294398	0.00266853	0.00164723	0.00816205	0.00445237	0.0562478	0.0316627	0.0119162	0.290976	0.0191791	0.0111173	0.172472	0.0107251	0.0338297	0.0630235	0.0227728
ACGCTAGTGATACACT-1	0.0180312	0.00577048	0.022055	0.00720838	0.0221288	0.0653824	0.1294	0.0767147	0.0570121	0.0726755	0.0107932	0.0382314	0.025114	0.00683662	0.063433	0.0359465	0.014975	0.0503592	0.00262146	0.0196935	0.0161611	0.0279837	0.00978454	0.022362	0.00477831	0.0162564	0.00755427	0.00680524	0.0112509	0.00523158	0.0648418	0.0149902	0.0046449	0.0429731
ACGCTGTGAGGCGTAG-1	0.00273663	0.00287669	0.00469436	0.00151641	0.0129421	0.102096	0.279962	0.204966	0.0164648	0.0615432	0.000288597	0.0381563	0.0194732	0.0019939	0.0129443	0.0318925	0.000525434	0.0194486	0.00643224	0.000521586	0.00118254	0.00197934	0.00131649	0.0153435	0.00178073	0.0274568	0.0740293	0.00192873	0.00579263	0.0241148	0.001866	0.0055913	0.00431387	0.0118292
ACGCTTAGTGTCTCTC-1	0.0225724	0.00284252	0.00594354	0.00141826	0.0154588	0.0546928	0.149509	0.0846695	0.0450588	0.117204	0.0140014	0.0457325	0.0174677	0.00757824	0.0356162	0.0211729	0.00614836	0.0866008	0.00405523	0.00760792	0.00881526	0.00874937	0.00632643	0.0367978	0.00429807	0.00956725	0.0423238	0.00668252	0.00630998	0.0231772	0.0227587	0.0181979	0.00883328	0.0518119
ACGGAATTTAGCAAAT-1	0.00501806	0.0044458	0.00547333	0.00755189	0.0149901	0.0146207	0.00331805	0.0103688	0.0327375	0.0106458	0.0336837	0.0222692	0.00529451	0.0218138	0.0109371	0.00419492	0.00497769	0.0136108	0.022721	0.00435816	0.00205633	0.0157468	0.00419315	0.0379556	0.032043	0.0236695	0.181379	0.0209019	0.02912	0.128744	0.06869	0.0661296	0.107864	0.0284774
ACGGACTCTCAAAGCG-1	0.00327336	0.00701905	0.0282927	0.0107961	0.0182727	0.0665046	0.0148153	0.0535782	0.0794693	0.0236181	0.0125412	0.0153644	0.0148218	0.029555	0.0670414	0.0016838	0.0314564	0.0221598	0.0217909	0.0213419	0.0215984	0.0215452	0.00597583	0.0149501	0.0229722	0.0138805	0.077945	0.0144136	0.0236874	0.0616116	0.0623267	0.024125	0.048917	0.0426554
ACGGAGCGCAAATTAC-1	0.0311629	0.00261411	0.00387869	0.00137427	0.0229174	0.0668407	0.1744	0.109045	0.0497888	0.0915938	0.00943566	0.0279517	0.0289759	0.00417828	0.0272713	0.0246654	0.00407273	0.0449563	0.00531668	0.00345864	0.0138283	0.00578559	0.00546181	0.0251874	0.00627409	0.021164	0.0635432	0.00630944	0.0116745	0.0312764	0.0167152	0.0150103	0.0144337	0.0294377
ACGGATGGTGCGGATA-1	0.0178112	0.00521961	0.0234161	0.00235652	0.0186295	0.0888037	0.0164115	0.0793435	0.123568	0.0202807	0.00659193	0.00539622	0.0113913	0.0330242	0.0494749	0.00168267	0.0151417	0.0134447	0.0203648	0.0160912	0.0291523	0.0300367	0.00508253	0.00844181	0.0292318	0.0116241	0.0744285	0.0143509	0.0276571	0.0523192	0.0644895	0.0190582	0.0362209	0.029463
ACGGCACTTGCTTGGG-1	0.00585424	0.00782301	0.0242891	0.00380921	0.020963	0.100055	0.0128219	0.0613406	0.0997441	0.0174045	0.00912273	0.000680649	0.0192755	0.0568859	0.0469154	0.000237055	0.0332991	0.024987	0.0229753	0.0721627	0.0086734	0.0651795	0.0130367	0.00368555	0.0184973	0.00955895	0.00376657	0.0166588	0.0348675	0.00865923	0.110668	0.0216082	0.0161631	0.0283307
ACGGCCAACATGGACT-1	0.00498041	0.00525285	0.0139434	0.0031851	0.0186899	0.136949	0.0384122	0.0860648	0.129332	0.0241218	0.00626198	0.00203725	0.00658708	0.0306962	0.0578597	0.00172123	0.0361106	0.0299181	0.0379422	0.0432428	0.0195981	0.0371795	0.0127987	0.00307077	0.0167261	0.00802357	0.00179991	0.0201335	0.0248484	0.00557498	0.0874761	0.0110228	0.00974435	0.0286946
ACGGCGACGATGGGAA-1	0.00736113	0.0278988	0.02892	0.00351855	0.0185866	0.132648	0.0218098	0.088197	0.0883414	0.024097	0.00880723	0.00191303	0.0252272	0.0221378	0.0629777	0.0019444	0.0467063	0.0264748	0.0565326	0.0605753	0.0185098	0.0346536	0.0116245	0.0017071	0.015164	0.0053691	0.00102009	0.0174276	0.036073	0.00393768	0.0622639	0.00876248	0.00779069	0.0210214
ACGGCGGGTTGCCCTG-1	0.00569994	0.00304473	0.00849061	0.0105615	0.0197083	0.0164494	0.00266346	0.012994	0.0175748	0.0151548	0.0228415	0.00705341	0.00450131	0.00530401	0.0136246	0.00740739	0.00922019	0.00802662	0.0245405	0.0174901	0.000919379	0.0292859	0.00527878	0.0338094	0.0483903	0.0197125	0.252372	0.0199428	0.0162106	0.152224	0.0348284	0.0464568	0.0923027	0.0159151
ACGGCTGGATGTAGAA-1	0.00828328	0.00550448	0.0109318	0.00525466	0.0124541	0.0285561	0.0491933	0.0452131	0.0145285	0.0295172	0.0103247	0.0543751	0.00674129	0.00584065	0.0387213	0.0121221	0.0042571	0.0388343	0.0342756	0.00225368	0.0012321	0.0105279	0.00422485	0.0448961	0.023798	0.0176479	0.179884	0.015196	0.01551	0.119787	0.0228541	0.0359743	0.0485885	0.042697
ACGGGAGTGTCGGCCC-1	0.0400175	0.00120533	0.00367766	0.000367479	0.0111245	0.0819025	0.00981974	0.0530024	0.182026	0.130933	0.00357899	0.00597596	0.00321063	0.0318725	0.0340933	0.000284639	0.0262667	0.0265802	0.0386256	0.0231843	0.00721574	0.0310258	0.0137303	0.00613409	0.0136029	0.00296066	0.0102392	0.0133977	0.0221843	0.0185842	0.0876255	0.0195507	0.0208495	0.0251499
ACGGGCGTATGCGACA-1	0.0603942	0.00515257	0.00403497	0.00319364	0.0118743	0.0261354	0.0241096	0.0177848	0.0460415	0.0828808	0.0138526	0.0812284	0.0245351	0.0221027	0.0282919	0.00833554	0.00574965	0.0354206	0.0352257	0.0078418	0.0132933	0.0139402	0.0115097	0.0375897	0.0154003	0.00636213	0.125399	0.0143895	0.0119371	0.0840942	0.0383892	0.0208049	0.0314045	0.0313007
ACGGTCACCGAGAACA-1	0.00779279	0.00193451	0.00167166	0.00141717	0.0101807	0.050026	0.130314	0.0719652	0.0856181	0.0868058	0.00312378	0.0904676	0.0155183	0.00549714	0.0675276	0.0276295	0.00245014	0.0461848	0.00199784	0.00375306	0.00895095	0.0029378	0.00645525	0.041899	0.00450431	0.0101247	0.0872266	0.00499454	0.00404533	0.0443674	0.0105877	0.0119812	0.0100374	0.0400117
ACGTACAGATTTCTCT-1	0.0164361	0.0164197	0.0261308	0.00718627	0.0212845	0.108742	0.190227	0.217842	0.0151754	0.0735366	0.000422456	0.0236467	0.0116808	0.00125533	0.0147331	0.044042	0.00305151	0.0394165	0.00118747	0.00446043	0.000796948	0.00598287	0.00284208	0.0181102	0.00204866	0.0650608	0.0148009	0.00221057	0.00812781	0.0039076	0.0171269	0.0099501	0.00305431	0.00910362
ACGTACTTTGGCACGG-1	0.173152	0.0261451	0.094382	0.0169557	0.0127169	0.0273759	0.00469823	0.0150917	0.020261	0.0279696	0.00707435	0.0219205	0.00357458	0.0165487	0.012081	0.0611781	0.00926678	0.0488679	0.0151631	0.00405951	0.00773476	0.0240429	0.00923903	0.0140751	0.0111748	0.0421713	0.071948	0.00789187	0.0132064	0.0574245	0.0555919	0.0114592	0.0271846	0.0283727
ACGTAGATTGCTGATG-1	0.0152579	0.0051815	0.00844235	0.00386554	0.0238487	0.0866555	0.193333	0.153814	0.0333776	0.0714278	0.00500329	0.0401018	0.0069703	0.00455736	0.0227767	0.0314295	0.00334427	0.0333759	0.00570098	0.00360728	0.00204634	0.0080351	0.00435258	0.0303646	0.00572462	0.0379838	0.0548115	0.00483898	0.0117358	0.0259406	0.0146484	0.0151545	0.00977269	0.0225194
ACGTAGGAGAGTCGCT-1	0.00457411	0.00779476	0.0299116	0.00351577	0.0169976	0.0913022	0.0673259	0.0854724	0.177767	0.0197541	0.00530583	0.00666884	0.0325218	0.0185733	0.0298714	0.00380152	0.0280077	0.0313612	0.0143434	0.0386005	0.0167593	0.0242788	0.00856808	0.0048927	0.0184776	0.0230952	0.00307689	0.0161894	0.0342464	0.00486689	0.0517764	0.027115	0.0101053	0.043081
ACGTATTACTCCGATC-1	0.00666877	0.00305402	0.00839224	0.00303451	0.0277925	0.0313712	0.0053545	0.0188978	0.0278356	0.0234238	0.0219998	0.01267	0.0162287	0.0171419	0.0206428	0.00806676	0.0192483	0.047694	0.0184145	0.0119606	0.00396895	0.0440915	0.00890519	0.0343597	0.0389705	0.0170515	0.174127	0.0207211	0.0211053	0.10355	0.0561963	0.0430226	0.0584994	0.0255383
ACGTCCTAAACGAGAT-1	0.211901	0.0385721	0.0548953	0.0168529	0.00604247	0.0186186	0.0259519	0.0214455	0.042587	0.0158598	0.00222992	0.0840725	0.00211581	0.00484034	0.0095784	0.0700069	0.00217806	0.0670692	0.00872083	0.00228743	0.00281857	0.00416703	0.00602418	0.0204823	0.00634203	0.06766	0.0616088	0.00456527	0.00895481	0.042687	0.030808	0.0103711	0.013799	0.0138859
ACGTCTCGTTCCGGGA-1	0.0260227	0.00172314	0.00217724	0.000919289	0.0123084	0.0499201	0.246814	0.137588	0.00760171	0.11917	0.000511093	0.0733531	0.00506967	0.000918995	0.00533515	0.0204339	0.000225068	0.0228171	0.00104448	0.000132423	0.0026148	0.000677619	0.00142381	0.0305677	0.00226407	0.0138049	0.154189	0.00173079	0.00394984	0.0329447	0.00277548	0.00640049	0.00607901	0.00649198
ACGTGCGCCTCGTGCA-1	0.0199068	0.00596744	0.0292942	0.00257156	0.0393941	0.0806109	0.110625	0.0970511	0.0530363	0.0646343	0.0184705	0.00958166	0.027611	0.0255996	0.0579677	0.0313351	0.012618	0.0567055	0.0066988	0.0192954	0.0124405	0.0177562	0.00673395	0.00905723	0.00565889	0.0165783	0.00528869	0.00561175	0.0131763	0.00349119	0.0601832	0.0250431	0.00798012	0.0420254
ACGTGGTCGAATGTGC-1	0.0183797	0.0067985	0.023266	0.00485495	0.0200673	0.0837968	0.119267	0.1147	0.0529846	0.0658749	0.00892005	0.0140484	0.00681278	0.0139966	0.0324926	0.0203866	0.0060947	0.0402184	0.00715143	0.0140897	0.0036281	0.0186912	0.00601015	0.0173694	0.0115804	0.0274339	0.0532151	0.00891267	0.0167601	0.0303789	0.0491973	0.0238009	0.0208007	0.0380207
ACGTTAATGTCGAAGA-1	0.0997046	0.0358015	0.280264	0.0338415	0.00971615	0.0420693	0.0140074	0.0353894	0.0318291	0.00799015	0.00287494	0.0110571	0.00348436	0.00835357	0.00867188	0.0960829	0.00862837	0.0420415	0.00299192	0.00427948	0.00325896	0.0121011	0.00408256	0.00125781	0.00292321	0.120558	0.000297838	0.00188274	0.0132343	0.000320449	0.0475567	0.00730774	0.0019658	0.004173
ACGTTAGATTTGCCCG-1	0.0356905	0.00613755	0.00964724	0.00393771	0.0159423	0.0698921	0.195054	0.113494	0.027196	0.0469329	0.00719594	0.0317394	0.01344	0.00668552	0.0588323	0.0240458	0.0156479	0.0603574	0.00309327	0.0175415	0.00910042	0.00636837	0.00654494	0.0249974	0.00484638	0.0179688	0.0391239	0.00704422	0.00996237	0.0207161	0.0421063	0.0111682	0.0101868	0.0273621
ACGTTCACTATGCCGC-1	0.00473146	0.0014161	0.00305238	0.017614	0.0149982	0.0130789	0.00188305	0.00795033	0.0266903	0.0158358	0.035217	0.0229912	0.00251273	0.00943511	0.00862577	0.00695561	0.00360967	0.0286285	0.0257656	0.00303646	0.00326182	0.0204733	0.00518048	0.0384518	0.0284021	0.0194685	0.204831	0.0213171	0.0189996	0.133851	0.0442554	0.0606482	0.128259	0.0185719
ACGTTCCGCGCTCCGT-1	0.0214936	0.0072696	0.0252511	0.0055439	0.0126676	0.0589226	0.125118	0.0882305	0.0133948	0.0458159	0.0244324	0.0418575	0.0406949	0.00897485	0.0555354	0.018407	0.00625086	0.0292261	0.00455678	0.0131567	0.00598583	0.0148546	0.00687898	0.0356459	0.0118643	0.0230025	0.0825379	0.0117723	0.0129601	0.0403813	0.020903	0.0221019	0.026801	0.0375103
ACGTTCGCAATCAATT-1	0.0326195	0.0127411	0.0460657	0.00498162	0.0258597	0.108697	0.148482	0.121563	0.0252179	0.0292717	0.00311613	0.00876204	0.005761	0.029298	0.0297869	0.00945473	0.0177416	0.041803	0.00920344	0.0078286	0.00278371	0.0231728	0.0200071	0.0169324	0.00800677	0.0405905	0.0249245	0.00831544	0.0148596	0.0131611	0.0447424	0.0153666	0.0157791	0.0331033
ACGTTCGTTCAGGAAA-1	0.00702446	0.0138215	0.0170204	0.00384696	0.0151099	0.116658	0.0974412	0.105545	0.0410707	0.0253675	0.00537542	0.00479974	0.0170792	0.0345887	0.0619682	0.0101002	0.0344031	0.0531049	0.0582697	0.0243209	0.0198271	0.0289721	0.015757	0.0091577	0.0118494	0.0149493	0.004065	0.0111874	0.0197625	0.00402227	0.058343	0.0150294	0.00836056	0.0318022
ACGTTCTGTACAAGTC-1	0.0160334	0.00954391	0.0099206	0.00345408	0.0106883	0.0508235	0.119234	0.0821182	0.0960242	0.0838846	0.00312183	0.033259	0.0106573	0.0111879	0.0396493	0.0236835	0.00728738	0.036966	0.00762395	0.00628562	0.0435859	0.0076151	0.0115066	0.0307039	0.006695	0.016959	0.0533863	0.00754492	0.00930544	0.0332987	0.0190004	0.0227361	0.0141682	0.0620474
ACGTTGTCGTTGAAAG-1	0.0114719	0.0075497	0.00792575	0.00525763	0.0212993	0.0608845	0.147341	0.10658	0.0187305	0.0883084	0.00755715	0.0274925	0.0195126	0.00911883	0.017799	0.0194125	0.00463736	0.0429019	0.00664779	0.00937668	0.00278137	0.0136629	0.00308654	0.0198308	0.0104925	0.0418379	0.066622	0.00672785	0.0119065	0.0423291	0.059855	0.0376891	0.025176	0.0181981
ACGTTTAGTTGTGATC-1	0.0492919	0.0182861	0.12667	0.0174	0.0322946	0.0613293	0.0703806	0.0954826	0.035367	0.0343232	0.000654148	0.0151834	0.00345362	0.00445852	0.0158796	0.0759714	0.0102475	0.0609131	0.00399579	0.0057903	0.00513495	0.0185135	0.00250049	0.00369083	0.00400197	0.135251	0.00222908	0.00235442	0.0149066	0.00099027	0.0318667	0.0271902	0.00352466	0.0104724
ACTAATACGTCAGGCG-1	0.0696071	0.0066928	0.0274814	0.00348755	0.019789	0.0739867	0.169697	0.131615	0.0213439	0.122549	0.000904312	0.0153075	0.00253012	0.00400297	0.0164144	0.0482118	0.00282604	0.0451838	0.00218368	0.00299344	0.000822168	0.0104177	0.00287396	0.0113015	0.00391577	0.033492	0.0240495	0.00339177	0.00959529	0.0149985	0.0627296	0.010276	0.00811131	0.0172177
ACTACAAAGAGAGGTG-1	0.0301271	0.00155419	0.00208012	0.00275198	0.0112927	0.0239141	0.00819402	0.014312	0.0559047	0.110323	0.0125302	0.0441415	0.00931056	0.0254033	0.0360369	0.00791436	0.0148098	0.0213413	0.0350899	0.00924424	0.0167164	0.0174082	0.00685419	0.035623	0.0193542	0.00426447	0.149318	0.0122111	0.011555	0.0822235	0.0606849	0.0243822	0.0317123	0.0514163
ACTACATCCCGACAAG-1	0.291182	0.117897	0.119365	0.041207	0.000309124	0.00531869	0.000360236	0.00290242	0.0224657	0.000421779	0.00054019	0.0352779	0.000352391	0.00342847	0.0161474	0.0765975	0.00619122	0.092198	0.0225114	0.00185035	0.00139976	0.00970416	0.0030151	0.000777819	0.00144514	0.0558739	9.35949e-05	0.000718527	0.00995604	0.000103342	0.0446897	0.00394685	0.000589968	0.0111625
ACTACCAGCTCTCTGG-1	0.00278602	0.00764205	0.0224651	0.0043141	0.0209278	0.121582	0.171535	0.216589	0.0158888	0.0672059	0.00151053	0.0106118	0.00885784	0.0109666	0.0202708	0.0303131	0.00722128	0.0471479	0.00179824	0.00582982	0.00208669	0.024206	0.00425067	0.00804994	0.00312328	0.0435473	0.00559715	0.00364641	0.0168542	0.00251522	0.055358	0.0182198	0.0042314	0.0128492
ACTACCATCCGAGGGC-1	0.0169656	0.0203192	0.0309246	0.00671282	0.024106	0.0608486	0.0679367	0.08413	0.0762143	0.0713289	0.0144214	0.00904444	0.00408796	0.0131928	0.0312999	0.00973789	0.00826067	0.0498277	0.00600068	0.0106486	0.00196888	0.0263606	0.00706598	0.0119972	0.0129732	0.0312674	0.0477103	0.0113835	0.0183416	0.0303794	0.0883159	0.0368076	0.0285508	0.0308689
ACTACGCGTTAGAATT-1	0.000796439	0.0090291	0.0163444	0.00149965	0.0100757	0.134595	0.0241148	0.0936771	0.143225	0.0107636	0.0135416	0.00180564	0.0178023	0.0239346	0.063267	0.00129048	0.0244567	0.0123	0.109648	0.0359923	0.0102052	0.0343001	0.0130221	0.00207609	0.0163642	0.00651059	0.00209784	0.0161693	0.0302614	0.00947328	0.0279481	0.00812932	0.0185123	0.0567704
ACTAGTTGCGATCGTC-1	0.013938	0.00984633	0.0173923	0.00620837	0.0257308	0.122547	0.0239265	0.0827461	0.059373	0.0275024	0.00640832	0.00544829	0.0307801	0.0177483	0.068296	0.00456969	0.0162847	0.013432	0.0375047	0.0510011	0.031481	0.0599901	0.0108397	0.0127834	0.0261933	0.00672112	0.0309301	0.0171094	0.0319163	0.0218672	0.0557582	0.017587	0.0204806	0.0156583
ACTATATGCTGTGTTC-1	0.00458885	0.00307993	0.00700918	0.00235433	0.0168258	0.0685056	0.119521	0.0800027	0.0643116	0.0670353	0.0361812	0.055334	0.0401522	0.00377925	0.0519671	0.0120377	0.0194257	0.057992	0.00610876	0.0320186	0.0238919	0.012034	0.0119869	0.0317101	0.0045147	0.00955814	0.0086489	0.0118201	0.0150778	0.00631584	0.0382637	0.0170923	0.00491482	0.0559404
ACTATCCAGGGCATGG-1	0.0272814	0.00760582	0.0170736	0.00317568	0.0215143	0.0882058	0.0410787	0.0718898	0.151107	0.0387974	0.00942371	0.00795526	0.0195756	0.0146431	0.0332583	0.00424976	0.0214163	0.0107441	0.0259504	0.0194385	0.00755418	0.0386468	0.0074748	0.00811859	0.0180077	0.0110541	0.0562735	0.0106058	0.0207734	0.042794	0.0665381	0.0167241	0.0226525	0.0383986
ACTATCTGCCCGCGTA-1	0.0244381	0.00469534	0.00962839	0.00210661	0.0139714	0.0884878	0.115231	0.112025	0.0641826	0.0465949	0.00711049	0.0158771	0.0136349	0.00789784	0.0649996	0.0307001	0.00824489	0.030578	0.019647	0.0140051	0.0120428	0.0224258	0.0085705	0.0161618	0.0126035	0.014403	0.046885	0.0118697	0.0213659	0.0286761	0.0292931	0.0110606	0.0160604	0.0545255
ACTATGTCCAGCTGCC-1	0.0373753	0.0123059	0.0291125	0.0105529	0.0240497	0.035143	0.00750273	0.027386	0.051879	0.010181	0.0146492	0.0288276	0.00369884	0.00924451	0.0208799	0.0314962	0.00522989	0.0456191	0.0203421	0.00732051	0.00343379	0.0324418	0.00863126	0.0244366	0.0234518	0.0333382	0.139788	0.015343	0.0293001	0.0996121	0.0388989	0.0303812	0.0550946	0.0330527
ACTATTCGTCCGTGGT-1	0.0466741	0.00140951	0.00282886	0.000914151	0.167826	0.00802319	0.00137705	0.00474139	0.0266142	0.157688	0.0108987	0.0172037	0.00420566	0.0188379	0.0128286	0.00781514	0.00753324	0.0484992	0.0138564	0.00277174	0.00461283	0.017605	0.00615252	0.0200473	0.0161425	0.00744142	0.0670307	0.00893166	0.0132297	0.0516722	0.131636	0.0313947	0.0300759	0.0314814
ACTATTTCCGGGCCCA-1	0.00465767	0.00853079	0.0384144	0.00843106	0.0202339	0.0944601	0.156165	0.151691	0.0385207	0.0491614	0.0110445	0.0217034	0.00978608	0.026924	0.018889	0.0103895	0.00688174	0.0229769	0.00618276	0.0162573	0.00522099	0.0136024	0.00811902	0.0110255	0.00757576	0.0523875	0.0247778	0.00614636	0.0189023	0.0157189	0.0464839	0.0237284	0.022833	0.0221773
ACTCAACGAATGTATT-1	0.00655192	0.00333259	0.00681106	0.00931488	0.0121875	0.00851774	0.00128959	0.00538531	0.0156522	0.0114445	0.0285793	0.0109494	0.00143239	0.00440602	0.0091859	0.00810971	0.00549265	0.0184738	0.0314901	0.0101549	0.000958879	0.027073	0.00353091	0.0279375	0.0542558	0.0261224	0.265228	0.0184032	0.0142865	0.183355	0.0214193	0.0504627	0.08213	0.0160755
ACTCAAGTGCAAGGCT-1	0.0297016	0.00885166	0.0150745	0.00436656	0.0138267	0.0460697	0.0662751	0.065275	0.0277842	0.0290728	0.0238094	0.0314791	0.00708301	0.00499067	0.0272323	0.0117924	0.00309745	0.0388335	0.0183572	0.00247953	0.00499929	0.0131404	0.00637831	0.0333325	0.0199733	0.0247838	0.167905	0.0142224	0.0173515	0.113223	0.0153438	0.0254536	0.037793	0.0306486
ACTCAATAAAGGCACG-1	0.015619	0.0049292	0.00998451	0.00527286	0.0306604	0.0336708	0.00818053	0.0244866	0.0583984	0.0230929	0.0134303	0.00652625	0.0114745	0.0216722	0.0243846	0.00336838	0.0224711	0.0193996	0.0230788	0.0125819	0.0077989	0.055525	0.0115704	0.0192401	0.0315936	0.006231	0.121351	0.0236037	0.0529617	0.103853	0.0892491	0.0296808	0.0451348	0.0295241
ACTCAGACCTGCTTCT-1	0.00976254	0.00228765	0.00222128	0.00174148	0.0125819	0.0342759	0.0581226	0.023318	0.0417515	0.0854285	0.00903117	0.0864373	0.0509655	0.0138782	0.0517061	0.00545599	0.00995254	0.0383551	0.0273575	0.0231182	0.0279626	0.00946118	0.0100412	0.0388812	0.0120983	0.00578406	0.0999766	0.0107189	0.00897844	0.0659835	0.032038	0.0362828	0.0205227	0.0335213
ACTCATGGCAGCCTTC-1	0.010038	0.008974	0.0437233	0.0138907	0.0129121	0.0843316	0.0325756	0.0757529	0.0388829	0.067466	0.0435101	0.0238903	0.0842026	0.0219408	0.0396891	0.0137412	0.0112164	0.0463216	0.00677628	0.0198581	0.01258	0.0212888	0.00755896	0.0102446	0.00911911	0.019339	0.0104485	0.00755907	0.020374	0.00824161	0.0720296	0.0250968	0.0343256	0.0421004
ACTCCAATATCATCAT-1	0.00537787	0.00365501	0.00707582	0.0124457	0.0275363	0.0106531	0.00241902	0.00791897	0.0200632	0.0161527	0.0141002	0.0138116	0.0017119	0.0152261	0.0245576	0.00265535	0.0035713	0.0109265	0.0130924	0.00606344	0.00345521	0.0141516	0.00369075	0.0414553	0.0382121	0.0105244	0.253067	0.019425	0.015624	0.176464	0.0364639	0.0552226	0.0941789	0.0190512
ACTCCCATTCCTAAAG-1	0.00820669	0.0129264	0.0294322	0.00239934	0.0227536	0.13735	0.0263868	0.0988317	0.114573	0.0477655	0.00609518	0.00175541	0.0175792	0.0201792	0.0319597	0.00120401	0.031031	0.00687691	0.0448146	0.0454463	0.00929648	0.0341138	0.0165846	0.0027832	0.0147525	0.00666389	0.00179607	0.0154744	0.0275927	0.00437896	0.111104	0.0102508	0.00814038	0.0295015
ACTCCCGAATTCGTTT-1	0.281631	0.163953	0.102346	0.0261266	0.002955	0.0188001	0.00300657	0.0124056	0.0202752	0.00119468	0.00143993	0.0348606	0.00164357	0.0019401	0.0139059	0.087418	0.00474053	0.0439805	0.00546218	0.001719	0.00738235	0.0201727	0.00344347	0.00307812	0.00325894	0.0717445	0.000673714	0.00219239	0.00717952	0.000746656	0.0265159	0.00803846	0.00349276	0.0122764
ACTCCCTAATGCTAAA-1	0.00770861	0.0138344	0.0183952	0.00450385	0.0181384	0.107556	0.174401	0.19563	0.0268634	0.0545587	0.00114386	0.0224432	0.0148328	0.00845548	0.0252291	0.0265765	0.0100444	0.0228054	0.00680558	0.0228168	0.00735595	0.0162776	0.00445726	0.00914758	0.00423358	0.0455811	0.00806496	0.00483748	0.0176699	0.00326484	0.0462558	0.0216221	0.00539007	0.0230989
ACTCCCTAGAATAGTA-1	0.00910678	0.00796333	0.0377704	0.00514858	0.00921309	0.0948802	0.0115328	0.0706723	0.216643	0.0178911	0.00489864	0.00126024	0.00951655	0.0234581	0.0817121	0.00390524	0.0321101	0.00752417	0.0378122	0.039218	0.00803769	0.0532087	0.00810565	0.00183986	0.0166835	0.015289	0.00336676	0.0136576	0.0302767	0.0118954	0.072817	0.00904185	0.00780471	0.0257388
ACTCCGGCCGACCACT-1	0.287389	0.113912	0.142011	0.0465717	0.0028029	0.0204584	0.00211228	0.0121081	0.0336208	0.00138273	0.0095453	0.0114368	0.00234266	0.00251911	0.0183396	0.0591103	0.00736087	0.0401572	0.00336309	0.00683748	0.00291786	0.035714	0.00419327	0.0011551	0.00241332	0.050975	0.000169496	0.00184177	0.0108954	0.000248592	0.0343176	0.00536242	0.00150786	0.0249062
ACTCGTAACCCGTCCT-1	0.0145606	0.00362867	0.00619311	0.000381677	0.0267878	0.0853607	0.0144132	0.0780441	0.308355	0.0289663	0.00459013	0.00297019	0.00761847	0.0317356	0.0266257	0.000147973	0.025875	0.00733717	0.0237118	0.0603173	0.0195309	0.0346803	0.00965454	0.00111275	0.0112811	0.00344143	0.00115829	0.00831652	0.0193406	0.00445734	0.0865549	0.00424436	0.00706668	0.0315395
ACTCGTCAGTAATCCC-1	0.00226096	0.00482178	0.0871623	0.0064636	0.0340552	0.10935	0.154781	0.224919	0.0195475	0.0443678	0.00069724	0.00337485	0.00550592	0.00801412	0.0175312	0.031205	0.0123696	0.0162591	0.00191742	0.025875	0.00622548	0.0213506	0.00355976	0.00510411	0.00438745	0.0351078	0.00413039	0.00361506	0.0272156	0.00227899	0.0461837	0.0157161	0.00672466	0.0079223
ACTCTCTGACTTAGGT-1	0.00655057	0.0129112	0.0503117	0.0206875	0.0278759	0.128272	0.109163	0.275427	0.0200406	0.0422509	0.00805998	0.00466169	0.0047077	0.00490516	0.0171752	0.0301492	0.00684103	0.0229732	0.00192314	0.0152254	0.00444738	0.0264585	0.00281381	0.00373933	0.00323614	0.037854	0.00302799	0.00267793	0.0109513	0.00143688	0.0580469	0.0184984	0.00382734	0.0128716
ACTCTCTTATACACGA-1	0.00611043	0.0080253	0.0918186	0.00902589	0.0542202	0.131708	0.0161979	0.104229	0.0479684	0.0140461	0.00487632	0.000600733	0.00876879	0.0284011	0.0196849	0.0104591	0.0336905	0.00924147	0.026402	0.0358995	0.00867173	0.036918	0.012163	0.00154895	0.0192455	0.0105288	0.00107638	0.0180181	0.0362984	0.00307288	0.13464	0.0126309	0.0117939	0.0320197
ACTCTTGTATAGTAAC-1	0.0224699	0.00561389	0.01057	0.00408647	0.0141423	0.0802636	0.16076	0.117387	0.0471723	0.0627016	0.00709535	0.0272873	0.0148048	0.00647883	0.0559578	0.0165991	0.00510171	0.0692714	0.0203502	0.0232685	0.0136964	0.0121864	0.00608123	0.024019	0.00615398	0.0171855	0.036911	0.00620375	0.01164	0.0183041	0.0203285	0.0084527	0.00681115	0.0406451
ACTGAAACGCCGTTAG-1	0.0509051	0.0505589	0.131827	0.020605	0.008107	0.061961	0.0509875	0.0702949	0.0423301	0.0161363	0.0167039	0.0164892	0.0175524	0.0068255	0.0272668	0.0894716	0.0147171	0.0419704	0.00505716	0.0088144	0.00920348	0.0191884	0.00798773	0.00629442	0.00769917	0.094517	0.003811	0.00510283	0.0252231	0.00345697	0.0338042	0.00750577	0.00540003	0.0222252
ACTGAATGGCGAAAGT-1	0.0133788	0.0137027	0.086572	0.00752583	0.030012	0.102104	0.0587249	0.120917	0.0327663	0.0290146	0.0052087	0.00311522	0.00279257	0.0140819	0.0145039	0.0449659	0.0202395	0.0465473	0.00558429	0.0179224	0.00775533	0.0220788	0.00692103	0.00486866	0.0100744	0.0527171	0.00659169	0.0086605	0.0339776	0.00555387	0.0850545	0.035134	0.0299931	0.02094
ACTGATTTAGTGATTC-1	0.0231854	0.00616451	0.00878771	0.00282557	0.0135172	0.0585759	0.104369	0.035622	0.0466597	0.0857692	0.0197092	0.0406303	0.0644774	0.0227832	0.0519816	0.0178969	0.0209393	0.0799062	0.00438318	0.02524	0.0258586	0.0136938	0.0157685	0.0385724	0.00516674	0.00579736	0.00625774	0.0126125	0.0119209	0.00545742	0.0530624	0.0175883	0.00586043	0.0489591
ACTGCCCGCCATTCTC-1	0.0164519	0.00232199	0.00802151	0.00472121	0.0136658	0.0152761	0.00429423	0.0102296	0.0198549	0.0290325	0.0374248	0.0301569	0.00769334	0.00730489	0.0132628	0.00818023	0.00322641	0.0241587	0.0347487	0.0018299	0.000870287	0.0166962	0.0047915	0.0405616	0.030876	0.0133986	0.233393	0.0171894	0.019381	0.159226	0.0363365	0.0389271	0.0613395	0.0351572
ACTGCCGTCGTAACTC-1	0.0199652	0.0025878	0.00667669	0.00396872	0.0847984	0.0556324	0.123278	0.0998042	0.0352364	0.119768	0.0125085	0.0439961	0.0176747	0.00347689	0.022948	0.0466815	0.00290909	0.040414	0.00346553	0.00207121	0.00324199	0.0083376	0.00345769	0.0201198	0.00576146	0.0234438	0.0501104	0.0060534	0.0101147	0.0310383	0.0462396	0.0156885	0.00959688	0.0189341
ACTGCGGACACACCGT-1	0.0204964	0.00219614	0.00442889	0.00165364	0.0229488	0.0838092	0.122273	0.10172	0.0428442	0.0353126	0.00977543	0.0330765	0.00598167	0.0161241	0.0398329	0.00708088	0.00351707	0.0137184	0.0197032	0.00870673	0.00636499	0.016625	0.0178961	0.0232377	0.0112205	0.0113352	0.106876	0.00950312	0.0270427	0.0804986	0.0345557	0.00918936	0.0189564	0.0314994
ACTGCTCGGAAGGATG-1	0.0445631	0.00172435	0.00106332	0.000910482	0.0129826	0.0345794	0.0519111	0.0585624	0.046113	0.191654	0.00295241	0.0339021	0.00355762	0.015901	0.00982014	0.00790976	0.00475922	0.00954242	0.0196083	0.011718	0.00303538	0.00589258	0.00529584	0.0343291	0.0123204	0.00829661	0.116698	0.0103733	0.00654324	0.080861	0.078794	0.0125614	0.024113	0.0371516
ACTGGGATGCCAGTGC-1	0.0144147	0.00551361	0.0083367	0.00363541	0.0111135	0.0481144	0.0592629	0.0503853	0.0446913	0.0374358	0.0136091	0.0339158	0.030526	0.0127468	0.0440181	0.00413108	0.00918803	0.0494228	0.0308713	0.0114093	0.0118778	0.0203982	0.0075692	0.0295944	0.0194703	0.0121496	0.126196	0.0124067	0.0127454	0.0779425	0.0268865	0.0272781	0.0427392	0.0500042
ACTGTACGATACACAT-1	0.16838	0.0370803	0.211927	0.0275386	0.0113473	0.0302791	0.00365567	0.0200432	0.0512333	0.00488304	0.00162873	0.0159511	0.00652593	0.00801227	0.0138226	0.0787415	0.0127779	0.0348927	0.00420514	0.0178388	0.00232716	0.0347787	0.00432466	0.00104858	0.00444133	0.0974977	0.000309902	0.00295943	0.0130002	0.000413313	0.0564068	0.0067584	0.0024942	0.012476
ACTGTAGCACTTTGGA-1	0.00109601	0.00139331	0.00739294	0.000511436	0.0139414	0.205038	0.0163282	0.146266	0.230061	0.016449	0.000850737	0.000728736	0.00194952	0.0066604	0.0628921	0.000485413	0.0186013	0.0130627	0.00891593	0.0179678	0.00262298	0.0493629	0.00564987	0.00120511	0.00932013	0.00289566	0.00160657	0.00636462	0.0425336	0.00248139	0.0821904	0.00487845	0.00410765	0.0141891
ACTGTATACGCGAGCA-1	0.0363202	0.00465166	0.00806454	0.00339579	0.0209203	0.0349321	0.0061264	0.0186328	0.0341746	0.053481	0.013347	0.0153865	0.00595851	0.0132385	0.0235876	0.00232892	0.0212728	0.00901016	0.0393547	0.0287719	0.0166177	0.0302711	0.00687663	0.0267361	0.0311977	0.0108345	0.150563	0.0231315	0.0195665	0.102765	0.0628682	0.0381693	0.0445726	0.0428743
ACTGTCCAGGATTATA-1	0.0301313	0.00422429	0.00388915	0.00212593	0.0132368	0.0648718	0.144078	0.101706	0.0552858	0.0467407	0.00476615	0.0390454	0.0093412	0.00576761	0.0283283	0.0170056	0.00189268	0.0290122	0.0157293	0.00375291	0.012724	0.00858078	0.00670003	0.0199021	0.00879781	0.0154786	0.0922253	0.00834432	0.0129033	0.0477106	0.013404	0.0193024	0.0181026	0.0948929
ACTGTCTTCTTTAGAA-1	0.0222668	0.00879532	0.0194415	0.00267287	0.0212142	0.0739726	0.110972	0.0684485	0.0332011	0.0701574	0.00341044	0.0212955	0.0175248	0.00837787	0.0523891	0.0152845	0.0176424	0.143435	0.0122745	0.0159969	0.0436268	0.0141724	0.0140627	0.0458156	0.00525385	0.0153144	0.00866195	0.00973427	0.0157563	0.00474125	0.0376638	0.0131797	0.00685089	0.0263929
ACTGTGCTAGTAGATC-1	0.00672139	0.0071602	0.0143665	0.006417	0.0153598	0.0854159	0.138056	0.147779	0.0172727	0.0773962	0.00205942	0.0361115	0.0176307	0.0136521	0.0248416	0.017789	0.00624416	0.024324	0.00530561	0.0106207	0.00126162	0.0138744	0.00614159	0.0242816	0.0103791	0.0381358	0.0637413	0.00711759	0.0149506	0.0368386	0.0376513	0.0295368	0.0234226	0.0181439
ACTGTTTAGTGTAGGC-1	0.322831	0.122924	0.0734454	0.0208987	0.000994697	0.00958584	0.000980411	0.00494772	0.0334421	0.000974681	0.00375142	0.0430859	0.00249954	0.00266445	0.0104648	0.0731809	0.00290911	0.0819981	0.00712594	0.00455612	0.0236513	0.00759113	0.00171827	0.00116412	0.0015631	0.0704638	0.000243882	0.00102329	0.00475186	0.000192059	0.0393269	0.0038598	0.000914732	0.0202748
ACTTACCGGGCGCGCA-1	0.0310688	0.000594994	0.00202902	0.00155153	0.268627	0.0172562	0.0204851	0.00987243	0.0377	0.0665824	0.00584832	0.0636501	0.019767	0.0101227	0.0394159	0.0124503	0.00392363	0.0643536	0.0218376	0.00232651	0.0171697	0.0102448	0.00653433	0.0184218	0.00959975	0.00285304	0.0648225	0.00700093	0.0145559	0.0386912	0.050912	0.0168166	0.0137776	0.029137
ACTTACGCATCCACGC-1	0.0293531	0.0184244	0.0194263	0.00505739	0.031693	0.115053	0.124176	0.162018	0.0597087	0.0285409	0.0034132	0.00436194	0.00956112	0.0104458	0.0163587	0.0161606	0.011291	0.0172814	0.0310669	0.01982	0.0064344	0.0254936	0.0080985	0.00743534	0.0120275	0.0225922	0.0193096	0.00882647	0.0321489	0.0112245	0.0408105	0.0236182	0.0146882	0.0340813
ACTTAGTACGACAAGA-1	0.0115038	0.00541083	0.0168105	0.00670761	0.0155086	0.100379	0.128021	0.1492	0.0294944	0.0807781	0.00803501	0.0119067	0.0164453	0.00669013	0.0197223	0.0144222	0.0108093	0.0146405	0.0108872	0.0132662	0.0104094	0.0193489	0.00652322	0.0153818	0.0105144	0.024131	0.0521591	0.00752114	0.0158958	0.0431244	0.0566707	0.0175082	0.0253346	0.0248388
ACTTATACTTACCCGG-1	0.0210319	0.00819265	0.037495	0.00835755	0.0104836	0.0169161	0.00334083	0.0119012	0.015195	0.0150839	0.0426042	0.0166489	0.00331729	0.0165948	0.0241354	0.0163465	0.00705276	0.0109989	0.00772904	0.0101557	0.00218594	0.0363799	0.00834124	0.0252594	0.0327506	0.0324892	0.1861	0.0157557	0.0214036	0.117912	0.064662	0.069513	0.0584924	0.0251734
ACTTATCTGATCTATA-1	0.304305	0.0617637	0.0807097	0.0231792	0.00101748	0.00480202	0.000901317	0.00304411	0.0137633	0.0087346	0.00194824	0.0590691	0.00081609	0.00140024	0.00750603	0.0883474	0.00284787	0.119886	0.0036156	0.0010567	0.00174812	0.00779155	0.0021035	0.00901341	0.00497578	0.0497381	0.056923	0.00205149	0.0035084	0.0261361	0.0202628	0.00734427	0.00737084	0.012319
ACTTATTAGGATCGGT-1	0.00580254	0.00342661	0.010538	0.00381836	0.0189569	0.0722366	0.158042	0.10615	0.0488228	0.094035	0.00248359	0.0353631	0.0208812	0.017048	0.0532998	0.0158518	0.00594608	0.0854922	0.00752473	0.0189731	0.0118147	0.0171885	0.00971414	0.0189166	0.00500649	0.00948538	0.0229967	0.00770653	0.0139769	0.0109034	0.0461963	0.00760077	0.00452692	0.0292737
ACTTATTTATGTGCCA-1	0.0205356	0.0156155	0.0559945	0.00497256	0.0273459	0.0954605	0.130448	0.159106	0.0171403	0.0745724	0.00729351	0.0116669	0.00699679	0.0216702	0.0218186	0.0378916	0.0140736	0.0384512	0.00325733	0.00701067	0.00560646	0.0263592	0.00457383	0.0103371	0.0041444	0.0732791	0.00482055	0.00417504	0.019626	0.00235845	0.0386288	0.0203882	0.00459535	0.00978557
ACTTCAGGCTGATCCC-1	0.0293742	0.00863392	0.0393873	0.0137339	0.0110836	0.1128	0.0182745	0.0849913	0.181233	0.0178496	0.00231643	0.00213654	0.0207038	0.0115262	0.0857952	0.000862263	0.0237015	0.0238273	0.0353552	0.0550923	0.00989636	0.0377072	0.007446	0.00132499	0.0138623	0.0167671	0.00126272	0.00920755	0.0241739	0.00326917	0.0698905	0.00818312	0.00665392	0.0116779
ACTTCCAGTGGAAGCT-1	0.0126967	0.00644814	0.00486292	0.00203244	0.0213877	0.081282	0.197271	0.187937	0.0164073	0.0714971	0.00291726	0.0484201	0.00801218	0.00329224	0.010386	0.0493476	0.000677683	0.0149521	0.00453699	0.000624182	0.00120175	0.00431951	0.00274334	0.0213314	0.00444608	0.029982	0.0850601	0.00355929	0.00830732	0.0398652	0.00934456	0.0191341	0.0112214	0.0144945
ACTTCCATGCGGGACA-1	0.193362	0.0514355	0.102408	0.0433623	0.0165662	0.0449487	0.0137779	0.0379867	0.0283791	0.0056807	0.00179858	0.0412348	0.0069532	0.00656551	0.0152914	0.100186	0.00756341	0.0487113	0.00803359	0.0114805	0.00722988	0.0151204	0.00467041	0.00507647	0.00531294	0.0665052	0.00674233	0.00534138	0.0200507	0.00664943	0.0406181	0.010161	0.0053399	0.0154557
ACTTCGCCATACGCAC-1	0.0195041	0.00810217	0.023897	0.0183152	0.0237434	0.0558115	0.0146773	0.0405123	0.0645222	0.0382387	0.00775668	0.00691994	0.0208771	0.0164743	0.0436572	0.00462673	0.0150465	0.0258347	0.0387522	0.018028	0.00507272	0.0284302	0.0073744	0.0161116	0.0217146	0.0141647	0.093172	0.0137658	0.0208289	0.0661352	0.106042	0.0247184	0.0315457	0.0456263
ACTTGACTCCCTCTTT-1	0.132316	0.0422256	0.251429	0.0534483	0.00181956	0.0149451	0.00156882	0.00958263	0.0404431	0.00262309	0.00037772	0.0194629	0.00153455	0.00399684	0.00983799	0.136448	0.00570029	0.0860305	0.00341524	0.00158291	0.00351158	0.0136314	0.00369219	0.00109683	0.00244017	0.0958088	0.000204561	0.00136358	0.0089044	0.000215496	0.039812	0.00517596	0.00120794	0.0041473
ACTTGCCATATTGTAC-1	0.0366173	0.0266332	0.0394286	0.00507826	0.0150678	0.0686768	0.0512575	0.0721694	0.0491081	0.0439609	0.00987429	0.0139714	0.00794681	0.0129177	0.0337767	0.0222385	0.0153891	0.024142	0.0193605	0.0138555	0.00505623	0.0299314	0.00796872	0.0159295	0.0162292	0.0206086	0.0853923	0.0111734	0.0192501	0.0556348	0.0448091	0.0266373	0.0381697	0.0417393
ACTTGGGACCCGGTGG-1	0.0185689	0.00484978	0.0131805	0.00539684	0.0145927	0.0780825	0.147469	0.0880442	0.0289173	0.0610464	0.0102708	0.0259153	0.0362022	0.00813604	0.095464	0.0264634	0.0115072	0.0572983	0.00586244	0.0346592	0.0317454	0.016412	0.0114633	0.0187779	0.00325631	0.0168012	0.00567802	0.00555861	0.0120949	0.00317441	0.0425319	0.00869367	0.00372521	0.0481602
ACTTGGGCTTTCGCCA-1	0.0172045	0.00329484	0.00333674	0.000852847	0.00917094	0.0734021	0.143398	0.122686	0.106795	0.0623319	0.00294286	0.0438947	0.00800466	0.00398426	0.0464829	0.0217342	0.0041806	0.039791	0.0128902	0.00260568	0.0146523	0.00768126	0.00697031	0.0211358	0.00712518	0.0156047	0.0728176	0.00690661	0.00921216	0.0448906	0.0107717	0.0130258	0.00947992	0.0307411
ACTTGTAGTCCCTTCA-1	0.00921406	0.00666563	0.0118042	0.00445989	0.0188342	0.118743	0.225247	0.24998	0.0159749	0.0705459	0.00255067	0.0185488	0.010026	0.0040718	0.0154064	0.0350639	0.00376548	0.0244167	0.00153059	0.00420333	0.000964144	0.00467019	0.00344455	0.0153477	0.00163128	0.0465674	0.0127912	0.00229525	0.00983505	0.00399745	0.0179833	0.0101133	0.003759	0.0155481
ACTTGTGGATGGAACG-1	0.0116775	0.00298825	0.00850785	0.0026956	0.0181277	0.0615644	0.0158178	0.0394256	0.113225	0.0586332	0.0296464	0.0226031	0.0291922	0.0115113	0.0328776	0.0121428	0.0285878	0.0159413	0.0346713	0.0296831	0.00823136	0.0246211	0.0175834	0.0134474	0.0228691	0.0102546	0.0561302	0.0150351	0.0241502	0.0493511	0.0815887	0.0206127	0.0271189	0.0494859
ACTTGTTACCGGATCA-1	0.0108871	0.00530756	0.0178196	0.0124805	0.0159421	0.0782965	0.127455	0.107383	0.050537	0.0697573	0.00404809	0.0316192	0.0122605	0.0140942	0.0400486	0.00534541	0.00644042	0.0134351	0.0223077	0.0164863	0.00480792	0.0155499	0.00721444	0.018755	0.0123839	0.023842	0.0560892	0.00863235	0.0166847	0.0331704	0.0625381	0.0230956	0.0217779	0.0335074
ACTTTACCCTCATGAA-1	0.215497	0.0659597	0.169156	0.0403514	0.00253477	0.0181451	0.00189856	0.00956317	0.0180254	0.00129009	0.00577817	0.028806	0.00182987	0.00938537	0.00960685	0.127269	0.00859357	0.0399369	0.0046411	0.00496778	0.00239199	0.0406535	0.00547469	0.00185336	0.00265674	0.101979	0.000312368	0.00201167	0.0102407	0.000351936	0.0331035	0.00613288	0.0018913	0.0077108
ACTTTCCTATAGCTTC-1	0.0200368	0.0108828	0.0338853	0.00808641	0.0181848	0.105722	0.175239	0.221555	0.0148142	0.0748428	0.000581733	0.0115162	0.0119109	0.0102767	0.00958633	0.0456209	0.00617925	0.0143995	0.00612154	0.00796225	0.00424716	0.0100789	0.00295808	0.00978863	0.00387107	0.0509263	0.0104922	0.00408335	0.0168097	0.00488954	0.0402129	0.0106291	0.00574905	0.0178597
ACTTTGACTGCATCCT-1	0.00705343	0.00271668	0.00287735	0.000872367	0.014694	0.0826985	0.260654	0.207008	0.0117116	0.114045	0.000153776	0.0620286	0.00419769	0.00285093	0.0126275	0.024513	0.000965611	0.0294151	0.000802078	0.000756085	0.000961733	0.00108217	0.00140029	0.0182275	0.00100141	0.0256208	0.057485	0.0012005	0.00472922	0.0154198	0.00167328	0.00805785	0.00503272	0.015466
ACTTTGGTCGTGCTCC-1	0.0402259	0.00966548	0.021073	0.00982392	0.0289054	0.0368204	0.0380423	0.0457469	0.0242012	0.0250767	0.0137694	0.0304978	0.00960354	0.0199485	0.0156189	0.0189922	0.00829428	0.0402649	0.0421618	0.00721162	0.0032055	0.0244203	0.00599082	0.0245858	0.0183852	0.0246951	0.160356	0.0128992	0.0148336	0.110267	0.0235322	0.0208424	0.0376266	0.032416
AGAAATTATGACTCGC-1	0.0243487	0.00339343	0.00220909	0.00110816	0.00954739	0.0682115	0.0907909	0.0955224	0.0660602	0.0486799	0.00264754	0.100437	0.0120565	0.00799782	0.0321668	0.0137822	0.0107872	0.0247132	0.0193028	0.006252	0.00790599	0.01922	0.0175935	0.0278268	0.010286	0.0125873	0.0943038	0.0142858	0.0106882	0.0557769	0.00759239	0.0103958	0.0126947	0.0588282
AGAACCCTCAATTGGG-1	0.0105152	0.0013864	0.00234706	0.00250534	0.0148966	0.0186166	0.0129105	0.0103268	0.0318039	0.0380555	0.0360138	0.0496539	0.0117446	0.0114393	0.0428955	0.0149483	0.00731543	0.0451736	0.0138882	0.00821104	0.00298534	0.0171403	0.00660002	0.0343426	0.0293233	0.0161922	0.186054	0.0156172	0.0171825	0.0991628	0.0346037	0.0574896	0.0684691	0.0301901
AGAACGTGGTACATTC-1	0.0241278	0.00582258	0.0117279	0.00390189	0.0107785	0.0214247	0.00342477	0.0148218	0.0514329	0.0335586	0.0139866	0.0128164	0.0157587	0.0116841	0.0148997	0.0120696	0.0217903	0.0210272	0.0259401	0.0169297	0.00265623	0.0490981	0.0108681	0.0181332	0.0299565	0.0148413	0.143825	0.0174082	0.0184147	0.135136	0.101096	0.036542	0.0431576	0.0309432
AGAACTGTACTTTGTA-1	0.090393	0.00907529	0.0303916	0.00643702	0.00842581	0.0500798	0.0902403	0.0709756	0.0488573	0.0780321	0.00387665	0.0337221	0.0129404	0.00452499	0.0522063	0.0466299	0.00448325	0.0410616	0.00955463	0.00638195	0.0178253	0.0152582	0.00588746	0.0147558	0.00732614	0.0331582	0.0419552	0.00707558	0.0127391	0.0332772	0.0362547	0.0114757	0.0111514	0.0535708
AGAAGAGCGCCGTTCC-1	0.0744007	0.010601	0.0366213	0.0034611	0.0324874	0.180501	0.0334169	0.108386	0.0221248	0.0564777	0.00182962	0.00428788	0.00494335	0.0183693	0.0121564	0.00257603	0.0127013	0.0176885	0.00972945	0.0139245	0.00676612	0.0304467	0.00557626	0.00221695	0.0109494	0.012512	0.00632598	0.0085374	0.0327994	0.00675688	0.114474	0.018069	0.0193322	0.0685531
AGAAGGTACACTTCAC-1	0.0577303	0.00120128	0.00160834	0.000472309	0.0114135	0.0490289	0.00875725	0.0236194	0.145881	0.141494	0.00662843	0.0267385	0.00976151	0.0205824	0.0335585	0.000894505	0.019974	0.0118576	0.0289503	0.0163275	0.013958	0.0105386	0.00703135	0.0252736	0.0148515	0.00253182	0.0722993	0.0119116	0.00935275	0.0684473	0.0804132	0.010784	0.0221644	0.0339623
AGAAGGTTGCCGAATT-1	0.0535174	0.00815228	0.0206836	0.00467245	0.0146805	0.0886526	0.193952	0.186627	0.00834221	0.106241	0.000239523	0.0274571	0.00472131	0.00223077	0.00564898	0.0506778	0.00278484	0.0326739	0.0012126	0.00227133	0.0037442	0.00171546	0.00282213	0.0166257	0.00173651	0.0752166	0.0283155	0.00240792	0.0105354	0.00740947	0.010047	0.0090311	0.00285231	0.0121016
AGAAGGTTGTAGGTCG-1	0.00165697	0.00757962	0.0138997	0.00592187	0.0217673	0.101278	0.120887	0.124672	0.0449171	0.0356343	0.0126318	0.0277626	0.0287166	0.0107071	0.063365	0.014883	0.00996175	0.0282557	0.0205179	0.0432008	0.0352442	0.0209273	0.00960169	0.00956975	0.00559872	0.0318872	0.00499274	0.00670017	0.0242713	0.00326562	0.042849	0.0198485	0.00693222	0.0400951
AGAAGTGATTCGTGAT-1	0.0396592	0.00159698	0.00683277	0.00254731	0.00882068	0.0275341	0.00482559	0.0180271	0.073598	0.173802	0.00553257	0.013631	0.00516509	0.0407793	0.0419398	0.000826061	0.00936781	0.0110963	0.0355282	0.0209701	0.00913502	0.0206327	0.00502957	0.0184295	0.022025	0.00503082	0.0975942	0.0100648	0.0116014	0.0847754	0.0805923	0.0198098	0.0336016	0.0395976
AGAATAAATCTTCAGG-1	0.00281117	0.00297644	0.006543	0.00255394	0.0311081	0.0808911	0.266331	0.148753	0.0193542	0.0822553	0.00115646	0.0652677	0.0278864	0.00450548	0.0283317	0.0311986	0.00242141	0.0481406	0.000915462	0.00252516	0.0104526	0.0010499	0.00307985	0.0276751	0.000945339	0.0270565	0.0262976	0.00223447	0.00428949	0.00692509	0.00278618	0.0124664	0.00299805	0.0158166
AGAATGCGGGTTCGGA-1	0.021939	0.00972332	0.0154341	0.00317311	0.0217243	0.111269	0.213448	0.215218	0.00913414	0.0973497	0.00519649	0.0182637	0.00549168	0.0033075	0.00845987	0.0444839	0.00158346	0.0155701	0.00100574	0.00193382	0.00054839	0.00251853	0.00229742	0.0195582	0.00210449	0.0461682	0.0331201	0.00211902	0.00767359	0.0143566	0.0149024	0.0144718	0.00569805	0.0107552
AGAATTATGGATTCGA-1	0.0234061	0.0114681	0.0258895	0.00800159	0.0132635	0.0407476	0.0183573	0.0256019	0.025798	0.00915373	0.00737803	0.0229465	0.0499886	0.0136101	0.119087	0.00825145	0.0113238	0.0174195	0.0374621	0.0250653	0.0086056	0.0276086	0.00633549	0.0267458	0.0261536	0.0133136	0.112898	0.0179036	0.0164323	0.0740067	0.0381178	0.0308249	0.0461101	0.040724
AGAATTGTTTGACATA-1	0.0268838	0.0067519	0.00929594	0.00408384	0.0126596	0.0762394	0.0629149	0.0869977	0.0852318	0.0437469	0.0126824	0.0185472	0.024862	0.0162683	0.0241877	0.00582651	0.0141649	0.0212492	0.0419909	0.0174924	0.00511478	0.0213104	0.0075698	0.0133865	0.0151588	0.0203663	0.0573302	0.0132718	0.0340918	0.0478059	0.053863	0.023413	0.0430591	0.0321811
AGACATAGATCCTTCC-1	0.0317242	0.00057728	0.000403253	0.000977339	0.00576174	0.00425299	0.0011329	0.00236042	0.0371915	0.112716	0.0189259	0.0382476	0.00244295	0.0146935	0.0083089	0.0033209	0.00335736	0.0208564	0.0275134	0.00375026	0.00275867	0.00728823	0.00403306	0.0305558	0.0274848	0.0109465	0.223199	0.0128025	0.00516027	0.17465	0.0442431	0.0338346	0.0550042	0.0295249
AGACCAAACCACACCT-1	0.0514922	0.000859559	0.00113497	0.000597195	0.00834682	0.050381	0.0137457	0.0329431	0.0803199	0.109661	0.00320645	0.03654	0.00704167	0.0244008	0.0451899	0.000587893	0.0163565	0.0190606	0.110442	0.022568	0.00941797	0.0114826	0.00856904	0.0174723	0.0124721	0.00305688	0.0886652	0.0136949	0.0102222	0.0831959	0.0548709	0.00989927	0.0177873	0.0243181
AGACCATGGGATACAA-1	0.00831036	0.0093185	0.0335079	0.00335744	0.0344326	0.0945063	0.172967	0.160592	0.0308831	0.0356876	0.00235259	0.00451215	0.00725881	0.0165838	0.0197743	0.0214639	0.0131545	0.0243917	0.00794402	0.0314719	0.0114409	0.0153025	0.00484194	0.00747943	0.00598975	0.0342411	0.00454865	0.00564241	0.0239185	0.00243158	0.0777108	0.033322	0.0125685	0.028091
AGACCCACCGCTGATC-1	0.00187597	0.0112152	0.0550535	0.00395909	0.0228749	0.0943214	0.0133598	0.0902306	0.201816	0.0206719	0.0183892	0.00113017	0.0101314	0.0353287	0.0513388	0.000192103	0.0353322	0.00670236	0.0143064	0.0510614	0.017596	0.0392532	0.00952464	0.00113798	0.0125373	0.00739433	0.000620257	0.011928	0.0300777	0.00202359	0.0840262	0.00774957	0.00642223	0.0304184
AGACCCGCCCTCCTCG-1	0.0046892	0.00727118	0.030489	0.00406649	0.0320755	0.104407	0.195542	0.171906	0.0162329	0.0660611	0.00314898	0.0096859	0.0245114	0.00609671	0.0444734	0.0362518	0.00856938	0.0362797	0.00177923	0.0118278	0.00245971	0.0123254	0.00382215	0.00908312	0.00232063	0.0353538	0.00572023	0.00367657	0.0145706	0.00307996	0.0424286	0.0168059	0.00513033	0.027858
AGACCGCTCCGCGGTT-1	0.00247561	0.00804621	0.031776	0.00743487	0.0104579	0.105232	0.0138591	0.0622271	0.259968	0.0114672	0.0119112	0.000502461	0.00372497	0.0183547	0.0753814	0.00263289	0.0292525	0.0117582	0.0710038	0.03438	0.0198449	0.0546262	0.00887382	0.00080777	0.0155375	0.00399875	0.000535178	0.0112392	0.0238462	0.00205419	0.039651	0.00775514	0.00853627	0.0308484
AGACCGGGAAACCCTG-1	0.0163569	0.00543828	0.00400866	0.00131396	0.0128161	0.0691583	0.184411	0.161019	0.0329715	0.069739	0.00145974	0.0447136	0.00496849	0.00266359	0.0254215	0.0192229	0.000873264	0.0393104	0.0132328	0.000938999	0.00054607	0.00194902	0.00247516	0.0252104	0.0050456	0.0219242	0.120885	0.00388046	0.00580621	0.0585357	0.00461148	0.00892361	0.0118073	0.0183614
AGACGAAGTGCCGGTC-1	0.00286829	0.00379821	0.0134572	0.00650596	0.0310681	0.0719368	0.0791191	0.0614655	0.0498001	0.042745	0.00910596	0.0207927	0.0318031	0.0201412	0.0701416	0.0128197	0.0109368	0.0508439	0.0269834	0.0207446	0.0356197	0.0231307	0.0103634	0.0291192	0.0138512	0.00996523	0.0629114	0.014517	0.0175804	0.0439276	0.0472943	0.0149234	0.0200353	0.0196839
AGACGACGATGCCGCT-1	0.000846016	0.00734235	0.0267606	0.019665	0.0125652	0.142245	0.0325033	0.129886	0.101852	0.00944518	0.00354456	0.001198	0.00654557	0.0210522	0.042229	0.00173419	0.0235953	0.0109053	0.054988	0.0412716	0.00476053	0.0325106	0.0134496	0.00746163	0.0134764	0.0137183	0.026663	0.014707	0.041977	0.0258392	0.0483047	0.0218889	0.0194692	0.0255994
AGACGGGATTGGTATA-1	0.125387	0.0208934	0.0731549	0.0199454	0.00744647	0.0228898	0.00887034	0.0184334	0.0450818	0.115374	0.0133046	0.0353595	0.00884657	0.012042	0.0190531	0.080148	0.00571023	0.057899	0.00578921	0.00689574	0.00189913	0.0135753	0.00486555	0.00762807	0.00670416	0.0716224	0.0328004	0.00463882	0.0107654	0.0224816	0.0571116	0.0243995	0.0104544	0.0285295
AGACGGGCCGATTTAA-1	0.0141767	0.00398548	0.00604359	0.0026047	0.0331522	0.0536917	0.145068	0.070528	0.0307941	0.0953664	0.0142333	0.0524161	0.0283243	0.00865581	0.0450907	0.020727	0.00661578	0.0606523	0.00530175	0.0113163	0.0216602	0.00833398	0.0129005	0.0425692	0.00554021	0.0219129	0.0466201	0.0103769	0.00936632	0.0284786	0.0208912	0.0189814	0.0107345	0.0328903
AGACTAGCCTTCCAGA-1	0.0095019	0.00995914	0.0251659	0.0125718	0.0283704	0.0869478	0.162389	0.122949	0.0381849	0.0371807	0.00490425	0.0143438	0.00858163	0.0146264	0.0478446	0.0240325	0.0126149	0.0411455	0.00931932	0.0446148	0.00976202	0.027565	0.00856216	0.0108995	0.00730799	0.0345628	0.00866439	0.00856149	0.0209203	0.00622104	0.0441626	0.012515	0.00756574	0.0374823
AGACTGTTACCGGGTC-1	0.107236	0.0214782	0.125646	0.0202309	0.0158874	0.0557943	0.0521921	0.0870192	0.0278543	0.0424477	0.00128891	0.0243391	0.0082966	0.00777485	0.0139253	0.0681029	0.00802703	0.0443228	0.00393734	0.00703595	0.00154806	0.01714	0.0044464	0.00433195	0.00384269	0.0728579	0.00256494	0.00414873	0.0506145	0.00166899	0.0643533	0.0104813	0.00577891	0.0133855
AGAGAAACACCAGAAA-1	0.00519261	0.00267688	0.00693064	0.00455268	0.01533	0.0494122	0.0131344	0.0323294	0.0657478	0.0301233	0.0298651	0.0124054	0.0344013	0.0153625	0.0178296	0.00224782	0.0131946	0.0190822	0.0317027	0.01817	0.00600676	0.0221994	0.0122361	0.0311042	0.0271188	0.0150957	0.162911	0.0176437	0.0185114	0.109237	0.0355206	0.0307155	0.0459026	0.0461054
AGAGAACCGTCTAGGA-1	0.142872	0.0672401	0.0613238	0.017034	0.0187301	0.0841498	0.0176607	0.07116	0.0371989	0.0093652	0.00471856	0.0170939	0.0201911	0.0147582	0.032611	0.0409973	0.0153949	0.0241761	0.0201575	0.0156332	0.0127245	0.040603	0.00684245	0.00369587	0.00897618	0.0302536	0.00424647	0.00770551	0.0202437	0.00635215	0.0834229	0.0091892	0.00803092	0.0252477
AGAGAAGGAGTACAAT-1	0.00332749	0.00780311	0.0143025	0.00364667	0.018456	0.127084	0.0775945	0.149722	0.0865991	0.0270525	0.0092104	0.011538	0.0399877	0.0380464	0.0320502	0.00738139	0.019603	0.0138693	0.0148571	0.0338879	0.00827377	0.034645	0.00818683	0.00414593	0.00987726	0.0205802	0.00329374	0.0114951	0.0306965	0.00376363	0.0822192	0.0194791	0.00602929	0.021296
AGAGATCTCTAAAGCG-1	0.00803984	0.00371103	0.00302763	0.00108047	0.0148467	0.0781689	0.236934	0.176505	0.023863	0.0505431	0.00485481	0.0458074	0.00356248	0.00261375	0.0230519	0.0367478	0.00105043	0.0313644	0.00555119	0.00106367	0.00119603	0.00212028	0.00156467	0.0223805	0.00396672	0.020198	0.107547	0.00407776	0.00583048	0.0433265	0.00186416	0.00648013	0.00881548	0.0182439
AGAGCAGTTATGAGAC-1	0.00426166	0.0103532	0.0234215	0.00259377	0.0193678	0.12187	0.0875133	0.164306	0.0926457	0.0285716	0.00386673	0.00298215	0.00586256	0.0290792	0.0383685	0.00695079	0.0127082	0.0299513	0.0293665	0.0319377	0.0110498	0.034185	0.00619307	0.00473275	0.0103368	0.0369486	0.00465409	0.00876329	0.0231364	0.00521133	0.0529182	0.0118105	0.0114178	0.0326643
AGAGCCGCCGAGATTT-1	0.0248738	0.00306783	0.00734049	0.00491143	0.0121138	0.0716033	0.124055	0.0999129	0.0478986	0.0632565	0.0103883	0.0454776	0.0153651	0.00872582	0.0466406	0.0292241	0.00782856	0.0438033	0.0181915	0.0100887	0.0093719	0.00945725	0.00530064	0.0203898	0.00827199	0.0197207	0.0655819	0.00632265	0.013676	0.0344166	0.0411598	0.0152324	0.0122846	0.0440468
AGAGCGGGCTAATCAT-1	0.0220577	0.00400109	0.0136654	0.00177464	0.0595107	0.0473521	0.0642823	0.0784473	0.0474409	0.157865	0.0106027	0.0168001	0.0092857	0.0126244	0.0165726	0.0541319	0.00800475	0.0285974	0.00568681	0.0177115	0.00227334	0.0175434	0.00461782	0.0119776	0.00920609	0.0323753	0.0361863	0.00572601	0.0165611	0.0268148	0.0969125	0.0231107	0.0177303	0.0225499
AGAGCGTACAAGCTCG-1	0.00289022	0.0113993	0.0117978	0.00317365	0.0214676	0.115717	0.230473	0.24124	0.0116816	0.0735084	0.00135753	0.0141987	0.00921835	0.00821434	0.0107145	0.0329031	0.00157679	0.0137899	0.00149523	0.00532542	0.00122993	0.0029936	0.0025739	0.0205773	0.00218221	0.0395401	0.0418399	0.00260941	0.011122	0.00993771	0.00806329	0.0154511	0.00587391	0.0138623
AGAGGCTTCGGAAACC-1	0.00898544	0.00471776	0.0122429	0.0053242	0.0264615	0.0784986	0.119641	0.113297	0.0542569	0.0531174	0.0234839	0.0172906	0.0179328	0.0064324	0.034303	0.0108798	0.0086791	0.0132353	0.016343	0.0152705	0.0117691	0.0395156	0.00695016	0.0201473	0.0134902	0.0253481	0.0676425	0.011307	0.0218451	0.039506	0.0369105	0.0193808	0.0195067	0.0262872
AGAGGTATCTCGGTCC-1	0.0244921	0.00491283	0.00887805	0.0129211	0.0191131	0.00982557	0.00173688	0.00649405	0.0329028	0.0147851	0.0169843	0.0134945	0.00123032	0.0091935	0.0179998	0.0106691	0.00808261	0.017709	0.00937127	0.00371491	0.000832813	0.0152882	0.00277885	0.0349104	0.0366653	0.0195665	0.256612	0.0180994	0.0113993	0.179923	0.0366019	0.0412403	0.0813089	0.0202625
AGAGTAAACTTCACTA-1	0.00996182	0.0132962	0.0196217	0.0023124	0.0158376	0.11107	0.0653763	0.111524	0.0629494	0.0552523	0.00491078	0.00598852	0.0323169	0.0305316	0.0392739	0.0103159	0.019356	0.0218231	0.0255416	0.0403245	0.0110624	0.0546135	0.0092854	0.00589291	0.011764	0.0163564	0.0114864	0.0132358	0.0377714	0.0128779	0.0644513	0.0188936	0.0141973	0.0205271
AGAGTTAGAGACCGAT-1	0.0322158	0.00342665	0.00629347	0.0014165	0.0195357	0.0623205	0.142128	0.0982816	0.045316	0.156084	0.00613699	0.048108	0.0107022	0.0056963	0.029261	0.0408269	0.00714224	0.0682046	0.00377302	0.00557778	0.00314431	0.00504896	0.00705581	0.0247951	0.0036492	0.020343	0.0157094	0.00420435	0.00673878	0.00912169	0.0505608	0.0158737	0.00497584	0.0363318
AGATAACTTCAGGGCC-1	0.00661397	0.0068629	0.0245124	0.00159995	0.0161359	0.133023	0.152102	0.225369	0.12147	0.0585713	0.000560616	0.00593154	0.00552039	0.0043748	0.0138431	0.0186473	0.00648836	0.0273076	0.00876858	0.0126296	0.00284521	0.0117451	0.00414075	0.0054759	0.00289067	0.0254355	0.00424957	0.00374809	0.0119029	0.00271438	0.0445704	0.00713732	0.00438891	0.0184228
AGATACCAATAGAACC-1	0.00153823	0.0104831	0.036374	0.00284022	0.0201874	0.117972	0.0239065	0.0734087	0.114759	0.0266967	0.0143151	0.00201321	0.00575442	0.0131035	0.049095	0.0059926	0.0197794	0.023519	0.033139	0.0250821	0.0292393	0.0299428	0.00950163	0.00481974	0.0241813	0.012117	0.0256808	0.0133753	0.0270176	0.0222895	0.033549	0.0329927	0.0197336	0.0956011
AGATACCAGCACTTCA-1	0.037937	0.00844606	0.0237322	0.00536591	0.0118951	0.0621271	0.250645	0.136189	0.010765	0.0860181	0.000526244	0.067476	0.00829184	0.00261454	0.00978429	0.039638	0.000445177	0.0300608	0.000660265	0.000552491	0.000683259	0.00178781	0.00212911	0.0237111	0.00226841	0.0303888	0.0723715	0.00188158	0.00717584	0.032242	0.00555955	0.00864042	0.00630971	0.0116809
AGATACCGGTGTTCAC-1	0.00859353	0.00255717	0.00602505	0.00337058	0.0109748	0.0582101	0.168284	0.0482462	0.0404931	0.060171	0.00742411	0.0553812	0.0303829	0.0118563	0.0940513	0.0155767	0.0113491	0.144739	0.0110559	0.0142599	0.0193661	0.00742326	0.0133061	0.0435523	0.00331008	0.00445193	0.0153857	0.00742269	0.00515008	0.00798111	0.0141454	0.00807642	0.00332467	0.0441022
AGATACGACTTCATAT-1	0.0153568	0.00307059	0.00677914	0.00788536	0.0170082	0.0330835	0.00958713	0.0178653	0.043949	0.0348099	0.0455529	0.0122535	0.00547064	0.0180785	0.0113367	0.00749246	0.00927938	0.0177407	0.0217373	0.0128056	0.0109291	0.0247381	0.0103735	0.0314554	0.0383953	0.0116096	0.181983	0.0189747	0.0177326	0.141737	0.0286599	0.0345216	0.0679865	0.0297613
AGATACTCAAGATCGA-1	0.0354781	0.0210854	0.100399	0.0210154	0.0179593	0.0820548	0.101618	0.118602	0.0280463	0.0394275	0.0114032	0.0118762	0.00523809	0.0187644	0.015315	0.0459942	0.00972347	0.0227609	0.00219464	0.0120956	0.00346547	0.0176862	0.00422501	0.00605692	0.00642182	0.124478	0.00724807	0.00375923	0.0148222	0.00451987	0.0395784	0.0227359	0.00828329	0.0156681
AGATATAATACGACTA-1	0.0188494	0.0050069	0.0171001	0.00330272	0.0347668	0.098537	0.107862	0.108914	0.064215	0.0719498	0.00524779	0.00861867	0.00469802	0.0267051	0.0214461	0.0140024	0.0223077	0.0112303	0.0368948	0.0264841	0.00564768	0.0290154	0.00854121	0.00933518	0.0135287	0.0263798	0.00685713	0.0106856	0.0213523	0.00525623	0.0943588	0.0146506	0.0147636	0.0314896
AGATCGTGCATAAGAT-1	0.0134776	0.00688627	0.00819504	0.00226916	0.0395985	0.0690662	0.133832	0.0855718	0.0387892	0.060595	0.0133064	0.0442382	0.0329646	0.00680614	0.0729201	0.0201024	0.0130922	0.0564099	0.00402925	0.0214746	0.0265768	0.00952554	0.0107503	0.0343036	0.00509597	0.0182011	0.0143814	0.00766893	0.0118095	0.00706081	0.0420867	0.0137739	0.00457903	0.0505623
AGATCTCAGGTGTGAT-1	0.0163895	0.0161457	0.0567871	0.00663896	0.0198666	0.112344	0.0207716	0.0874086	0.0463358	0.0319868	0.00909862	0.00327879	0.0361593	0.0205506	0.0466038	0.0126845	0.05042	0.0602243	0.00924196	0.0726941	0.0102739	0.0407768	0.00827983	0.00274154	0.0122587	0.0120257	0.000965842	0.0101717	0.0331494	0.00296854	0.0826688	0.0153051	0.00784861	0.0249347
AGATGACTCGCCCACG-1	0.0558014	0.0307243	0.204311	0.0590324	0.0203288	0.043547	0.0169337	0.0404167	0.0215148	0.00453658	0.00236377	0.00984467	0.00279704	0.0140979	0.011075	0.106078	0.0105822	0.0371541	0.00265785	0.0146345	0.0022909	0.0180944	0.00334434	0.00103944	0.00451661	0.171397	0.000292866	0.00197878	0.0149344	0.000327845	0.0418345	0.0183185	0.00286302	0.0103352
AGATGAGGGTTGCGAT-1	0.0308316	0.000111052	0.000279309	0.000110599	0.273869	0.00344568	0.00182295	0.00172071	0.0793833	0.100562	0.019617	0.0360416	0.00892712	0.00424034	0.0392417	0.0108288	0.00354308	0.0600986	0.00791602	0.00202047	0.0115456	0.0255476	0.0044476	0.0143699	0.0102112	0.000796063	0.0287329	0.00761122	0.0105384	0.0255811	0.0954888	0.0301934	0.0103123	0.0400131
AGATGATGGAGTCTGG-1	0.207424	0.124031	0.125864	0.0394926	0.00307204	0.0133928	0.00213093	0.00711568	0.0169971	0.00212544	0.00421652	0.0328114	0.00151982	0.00468904	0.0168525	0.075978	0.00780199	0.075745	0.00306168	0.00306631	0.000897301	0.0136972	0.00520303	0.00944039	0.00746373	0.0522835	0.0337037	0.00831341	0.00895703	0.0279968	0.0266022	0.00655086	0.00962056	0.0218825
AGATGCAAGACGTGCA-1	0.0046068	0.00983716	0.0118612	0.00359245	0.0276972	0.103441	0.224107	0.186783	0.0322698	0.0517675	0.00118876	0.0192639	0.00473961	0.0106937	0.0235371	0.0220202	0.00455589	0.0228498	0.0235804	0.0135179	0.00359156	0.0132252	0.00527136	0.0167604	0.00350718	0.0350075	0.0199793	0.00583478	0.0179734	0.0124299	0.0317905	0.00895278	0.00686643	0.0168997
AGATTATAGGACGTTT-1	0.0416569	0.00453168	0.0059595	0.00283559	0.0117854	0.0719244	0.120725	0.112183	0.0993793	0.0585237	0.0102364	0.0296325	0.0095921	0.00858479	0.0354106	0.0182596	0.00279121	0.0415748	0.0186355	0.00325617	0.0141081	0.00703303	0.00425598	0.0175968	0.00873266	0.0165898	0.0647662	0.00711278	0.0109902	0.0401671	0.0229877	0.0124048	0.0120046	0.0537721
AGATTCACAACCGATA-1	0.0305192	0.00107592	0.00156937	0.00201203	0.00617629	0.0212383	0.00512258	0.0127035	0.100276	0.0993902	0.00567433	0.0282346	0.0069378	0.017383	0.071738	0.00128476	0.00489753	0.0156562	0.0274159	0.0127111	0.00988718	0.0168742	0.00789	0.023164	0.0217631	0.00521205	0.166623	0.0148655	0.0121733	0.115008	0.0467589	0.0181757	0.0281292	0.0414589
AGCAAAGGCCGCTAGT-1	0.0107449	0.00624515	0.0210078	0.00654471	0.0224392	0.0679895	0.0353084	0.0500112	0.0445581	0.0623599	0.0102702	0.00850508	0.0175231	0.0498056	0.0392181	0.00692145	0.0239856	0.0523081	0.0253942	0.0442162	0.0127389	0.0367898	0.00891558	0.0126752	0.0238271	0.0104836	0.0531852	0.015989	0.0245079	0.0430077	0.060568	0.0234256	0.0264361	0.0420938
AGCAACATATCTTATT-1	0.0237127	0.0137023	0.0487111	0.00856365	0.012328	0.0441177	0.00848199	0.0255174	0.0430777	0.0217012	0.0180763	0.0053588	0.00628913	0.0201615	0.0694749	0.00632078	0.0339424	0.0324753	0.0244123	0.0401902	0.00725534	0.0455517	0.0178542	0.0101445	0.0268953	0.0208288	0.0564391	0.0204473	0.0452996	0.0535932	0.0926155	0.0236172	0.037151	0.0356921
AGCAACCGAAAGTAAT-1	0.0164595	0.00564711	0.0181913	0.00355925	0.0127495	0.0648307	0.0169111	0.0508335	0.137634	0.0474678	0.0121028	0.00312916	0.0198292	0.054282	0.0735205	0.00503586	0.0263276	0.0103668	0.037177	0.0417777	0.0251322	0.0492056	0.0150612	0.0050554	0.0200256	0.00607048	0.00852753	0.0261442	0.0586038	0.0163105	0.0532026	0.00678141	0.0165537	0.035493
AGCACACGTTTAGACT-1	0.0211071	0.00370333	0.00414748	0.00455943	0.0145339	0.0107031	0.00305992	0.00780723	0.0178211	0.0259126	0.02111	0.0225099	0.00319079	0.0105497	0.0135673	0.0134931	0.00516493	0.0136589	0.0178742	0.00590769	0.00188857	0.0199558	0.00466434	0.0447716	0.0350992	0.0261838	0.236286	0.01684	0.0215284	0.152711	0.0379763	0.0556722	0.0823006	0.0237402
AGCACCAGTACTCACG-1	0.0191142	0.0111954	0.0403829	0.00750615	0.0126259	0.0694572	0.0182055	0.0538356	0.0607118	0.140466	0.0079686	0.00607086	0.0062964	0.0233258	0.0599513	0.00457114	0.0343696	0.0104482	0.0161661	0.0392782	0.00448493	0.0295143	0.0070261	0.00810612	0.017069	0.00696426	0.0321351	0.0101713	0.0152239	0.0305859	0.135065	0.0226881	0.020787	0.0182317
AGCACTACCGGCCTGT-1	0.0696861	0.00596028	0.00910551	0.00327367	0.010505	0.0620774	0.137489	0.126054	0.054571	0.0490779	0.00820748	0.0906815	0.00425069	0.00246048	0.0336736	0.044469	0.00123945	0.0500852	0.00633923	0.000971722	0.0014572	0.00288277	0.00275632	0.0238859	0.00485426	0.0326105	0.0736142	0.00407339	0.00920408	0.0306031	0.00844852	0.00825174	0.00923624	0.0179438
AGCACTACCTCACCAG-1	0.00646135	0.00815038	0.0351178	0.00104148	0.02296	0.143	0.0167325	0.12529	0.148922	0.00923907	0.00628852	0.00060713	0.00400167	0.00947605	0.0503488	0.000809341	0.04899	0.00694276	0.0399678	0.0477732	0.0160481	0.0553595	0.00707168	0.00121615	0.0183673	0.00578842	0.00105964	0.0105746	0.0201793	0.00351374	0.0744897	0.00931614	0.0135429	0.0313531
AGCACTTAAGGACGCC-1	0.00787637	0.00363877	0.0117863	0.00462418	0.0142826	0.0558096	0.0819604	0.0902758	0.0165506	0.046654	0.0115079	0.00994802	0.00456404	0.0076505	0.0253125	0.0190567	0.00602447	0.0298602	0.00453482	0.00710441	0.00345615	0.0175256	0.00407738	0.0239649	0.0167333	0.0568794	0.0871829	0.00816086	0.0241732	0.0446768	0.0922458	0.0824952	0.0491831	0.0302231
AGCAGAAGGAGAAAGA-1	0.0635012	0.0361796	0.207327	0.037514	0.0187231	0.0585207	0.0160156	0.050428	0.0335744	0.00598783	0.00501193	0.00803673	0.00155707	0.00650549	0.0159486	0.100113	0.0170615	0.0380551	0.00202397	0.0101863	0.00167036	0.029152	0.00370098	0.00125957	0.00559792	0.103026	0.000439362	0.00319385	0.0151501	0.000467557	0.0704028	0.00866412	0.00470951	0.0202953
AGCAGCCAGATGAATA-1	0.00606059	0.00712838	0.0225022	0.000848399	0.0109384	0.109229	0.0140835	0.0732723	0.243108	0.0332327	0.018295	0.00138001	0.00821349	0.0173238	0.0225329	0.000944662	0.0229688	0.0154824	0.0298396	0.0245385	0.0100342	0.0487486	0.0188481	0.00167105	0.0221079	0.0154316	0.00252579	0.0232125	0.0496072	0.0132645	0.0648315	0.00842177	0.00860791	0.030764
AGCAGTCGAAGCATGC-1	0.0686054	0.0159535	0.0469624	0.00766369	0.0116371	0.0442358	0.0552605	0.054137	0.0410503	0.136773	0.0092778	0.0179016	0.0117797	0.00831834	0.0262877	0.0458506	0.0174346	0.0357214	0.00400806	0.0107123	0.00142999	0.0309634	0.00494434	0.00938436	0.0101556	0.0621418	0.0346673	0.00652539	0.0136876	0.0281857	0.0711007	0.0146867	0.010907	0.0316497
AGCATATCAATATGCT-1	0.0154074	0.00407012	0.00961251	0.00361787	0.018372	0.0642348	0.0107936	0.0389072	0.0952955	0.0136793	0.0183247	0.00949888	0.0094731	0.0189099	0.0717137	0.00187332	0.00876143	0.0226664	0.0247115	0.0219134	0.00835315	0.0435815	0.0158056	0.0178733	0.0225117	0.00675529	0.112181	0.0175128	0.0334456	0.0995872	0.0635576	0.017332	0.0264082	0.033259
AGCATCATTTCGAAAG-1	0.0141466	0.0080365	0.0210191	0.00327001	0.0179944	0.0846027	0.0132665	0.071489	0.127114	0.0217819	0.0118862	0.00637513	0.0107698	0.027228	0.0568241	0.000769613	0.0137752	0.00777386	0.0441685	0.0280664	0.0192883	0.0456173	0.00733164	0.00869121	0.0256244	0.00811259	0.0618481	0.0203155	0.0262406	0.0439099	0.0620579	0.0195261	0.0303797	0.0306991
AGCATCGTCGATAATT-1	0.00593887	0.0158249	0.0231933	0.00721686	0.0364835	0.10538	0.137103	0.151775	0.0301834	0.0543357	0.00408758	0.00707297	0.0144285	0.0262213	0.0415694	0.0151804	0.0166706	0.0256729	0.00844791	0.023206	0.00530293	0.0193781	0.00486719	0.0079338	0.00592611	0.0305951	0.00632073	0.00596344	0.019639	0.00359963	0.0927987	0.0175804	0.00874346	0.0213594
AGCATTACGAGGCAAG-1	0.00781731	0.00607796	0.0102176	0.000717199	0.0151332	0.0998214	0.0672186	0.0843679	0.199279	0.0255507	0.0025943	0.0140203	0.0170538	0.0122701	0.043897	0.00484305	0.0177966	0.00810753	0.0390215	0.0286409	0.0349186	0.0261598	0.0212996	0.00605727	0.0156595	0.00769047	0.00603123	0.0164611	0.036543	0.0101827	0.0405708	0.0081328	0.00786298	0.0579846
AGCCAAGCTTTGTGTC-1	0.0193131	0.0112755	0.0657625	0.0157818	0.0182145	0.0834792	0.140301	0.172001	0.0222127	0.0538674	0.000857549	0.00732715	0.00719518	0.0121467	0.0165191	0.0744297	0.00546001	0.026458	0.00247577	0.0184511	0.00197689	0.0122791	0.00250198	0.00514374	0.00288713	0.0940492	0.00454866	0.00246956	0.0172657	0.00220547	0.046626	0.0144447	0.00460508	0.015468
AGCCACAGGTTACCCG-1	0.0163773	0.0125697	0.0280906	0.012759	0.0146145	0.0735747	0.177978	0.124713	0.0244891	0.0826001	0.00207635	0.0224249	0.0172071	0.0102718	0.0469319	0.0616712	0.00933493	0.0360152	0.00310516	0.00632494	0.00172831	0.0251866	0.00946084	0.0160957	0.00405999	0.0411839	0.0124266	0.00434921	0.0164164	0.00528693	0.0299855	0.0190857	0.00622404	0.0253812
AGCCACTCCCGTGCTT-1	0.00964708	0.0131214	0.0210037	0.00440874	0.0307413	0.0881265	0.140192	0.133262	0.038155	0.0871914	0.00526077	0.0107136	0.0372235	0.0165993	0.0399561	0.0313258	0.0109311	0.0281458	0.00265132	0.039408	0.00764942	0.0173215	0.00900576	0.0128369	0.00537128	0.0256738	0.00652795	0.00768279	0.0190805	0.00335757	0.0525575	0.0154944	0.00762289	0.0217537
AGCCATATAGTATGTG-1	0.00236517	0.0102474	0.0238015	0.00324716	0.0167336	0.118259	0.114213	0.110827	0.0435138	0.0256675	0.00855691	0.00817096	0.0203759	0.0354168	0.0396497	0.0100841	0.0152089	0.0587268	0.0170873	0.0208369	0.0143819	0.0186477	0.0232506	0.0100297	0.0137813	0.0168315	0.00899452	0.0142635	0.0420021	0.00733198	0.0498054	0.0108419	0.0100727	0.0567771
AGCCCATACATGTAAG-1	0.0211315	0.0035875	0.00205661	0.00130123	0.00966934	0.0580634	0.0897636	0.0758341	0.0601566	0.0712335	0.00351791	0.0334403	0.00401503	0.0191722	0.0549103	0.00730592	0.00506332	0.037064	0.0358626	0.018125	0.0114993	0.00798138	0.0064564	0.0337581	0.014416	0.011188	0.131892	0.0111944	0.00732732	0.0876087	0.00731243	0.0128561	0.0251029	0.0201332
AGCCCGCAACAAGCAG-1	0.0125743	0.00309289	0.00462443	0.00153803	0.0113459	0.0808839	0.0383423	0.0378132	0.11836	0.0640395	0.0194281	0.0530895	0.0344624	0.039784	0.0456054	0.00376404	0.0103889	0.0268094	0.0373432	0.0297682	0.0190916	0.0246376	0.0134199	0.0220804	0.0144013	0.0078261	0.0535419	0.0116787	0.0124867	0.0379591	0.0254788	0.0176461	0.0149089	0.0517854
AGCCCGGCATTAGAGG-1	0.00951025	0.00405785	0.00249998	0.00627755	0.0189503	0.00731868	0.00258723	0.00533482	0.017474	0.019507	0.0286066	0.0233391	0.00238866	0.00842258	0.006875	0.00334275	0.00479054	0.016526	0.0230703	0.00239865	0.00216034	0.0153989	0.00353007	0.0443391	0.0337479	0.0108453	0.284323	0.0231286	0.0116768	0.206223	0.0175426	0.0449273	0.0723266	0.0165526
AGCCCGGTAGCCTGTA-1	0.00373445	0.00561637	0.0273053	0.00380892	0.0211665	0.117316	0.0776593	0.115871	0.0554416	0.0416355	0.00625117	0.00850769	0.0274078	0.0763481	0.0463983	0.00499378	0.0236216	0.0258036	0.0131571	0.0458373	0.0105602	0.0383383	0.0053482	0.00502833	0.01199	0.0170654	0.00430729	0.0124982	0.0251344	0.00483468	0.057813	0.0119395	0.0117517	0.0355085
AGCCCTAAGCGAAGTT-1	0.0390119	0.0139531	0.0364096	0.00508592	0.0328101	0.097371	0.158396	0.17268	0.0299895	0.056639	0.00152173	0.0106738	0.00683812	0.0104554	0.0198664	0.0578192	0.00596168	0.0369477	0.0027388	0.0137613	0.00283211	0.0111251	0.00384002	0.0089698	0.00379102	0.0493204	0.00784508	0.003947	0.0117049	0.00457871	0.0539277	0.0119383	0.0043797	0.0128698
AGCCCTCCCTGGTGGC-1	0.0114171	0.00304648	0.00288394	0.00996658	0.0186526	0.00973466	0.00309489	0.00797664	0.0165892	0.0170862	0.0303428	0.0315405	0.00192363	0.00695287	0.00832286	0.00689253	0.00389676	0.0140932	0.0144048	0.00293481	0.000540429	0.0172272	0.00332751	0.0434895	0.038944	0.0165564	0.270076	0.0204487	0.0130742	0.175195	0.0260415	0.0495579	0.0786003	0.0251687
AGCCCTTCTAATCCGA-1	0.0108981	0.00481245	0.0118402	0.0031599	0.0177428	0.0752201	0.134065	0.104352	0.0700019	0.0749061	0.00892157	0.029643	0.0250055	0.00420133	0.0402892	0.0206481	0.00616428	0.0489392	0.00855758	0.0212428	0.0220398	0.00621977	0.00687634	0.0282672	0.00927894	0.0159664	0.0436035	0.00730982	0.00890836	0.02502	0.0382809	0.0149733	0.0114796	0.0411656
AGCCGTGGCTAAATGT-1	0.00148063	0.00877255	0.0216756	0.0020972	0.0109841	0.0900551	0.0105314	0.0724907	0.307266	0.0202025	0.00381931	0.00109036	0.00655938	0.0227213	0.0268283	0.00211289	0.0265063	0.00599149	0.0201365	0.041019	0.0208316	0.0735423	0.00808015	0.000838518	0.0137737	0.00504683	0.000326951	0.0081777	0.0398785	0.00162176	0.0706009	0.0170516	0.00672033	0.0311687
AGCCTAATACCCACGT-1	0.00631565	0.0129083	0.0250517	0.0029225	0.0124575	0.101645	0.0314014	0.0903722	0.0952686	0.0264771	0.0142879	0.0143915	0.0197017	0.0153494	0.0576745	0.00391575	0.0220792	0.0149172	0.0489785	0.0356374	0.023246	0.0270187	0.00634657	0.00713137	0.0163386	0.010695	0.0287147	0.0142225	0.0382935	0.0334242	0.0806972	0.0142496	0.0182293	0.0296403
AGCCTTAAAGCGGAAG-1	0.00488956	0.00718399	0.00903273	0.0035644	0.0258501	0.0854426	0.226109	0.154113	0.0129637	0.0807263	0.00385278	0.0287683	0.0226307	0.00187453	0.0202611	0.0381073	0.00109935	0.0412467	0.00184026	0.00246008	0.0018667	0.00249334	0.00459237	0.035805	0.00343317	0.0325778	0.0531735	0.00340303	0.00882327	0.0244259	0.010948	0.0168398	0.0112352	0.0183659
AGCGACAGGAACGGTC-1	0.00671426	0.0192026	0.0169589	0.00302145	0.0266646	0.106251	0.0223463	0.0857496	0.119688	0.0123951	0.00661495	0.00189511	0.0208433	0.0390716	0.0367239	0.00118088	0.016886	0.0191321	0.0307899	0.052974	0.00877181	0.0443518	0.00777018	0.00314837	0.0170885	0.00970128	0.0108104	0.0156749	0.0644539	0.0188949	0.0908943	0.0114234	0.0180651	0.0338471
AGCGACATCCCATTCA-1	0.00180011	0.0219848	0.03306	0.00505584	0.0230645	0.114338	0.192013	0.189451	0.0285247	0.0438869	0.00371118	0.00550202	0.0042413	0.0128767	0.0267285	0.0456394	0.00958226	0.0250843	0.00450352	0.0123372	0.00884933	0.0248737	0.00665731	0.00848309	0.00355512	0.0282834	0.00526091	0.00533366	0.020313	0.00318756	0.0442431	0.0168069	0.00598808	0.0147788
AGCGACCAACGATATT-1	0.00374238	0.012343	0.0435111	0.00435874	0.0547192	0.0850938	0.18102	0.168202	0.0128809	0.112976	0.00422938	0.0112638	0.017932	0.00465971	0.0242494	0.0380335	0.00548079	0.0212893	0.00227108	0.00682324	0.00174121	0.0136275	0.00296177	0.0120697	0.00223668	0.0507164	0.00750763	0.00339536	0.0166497	0.00344708	0.0329581	0.0164947	0.00368671	0.0174279
AGCGACTTTGAAGACA-1	0.00995892	0.00798622	0.010995	0.00373151	0.0237314	0.0892252	0.125656	0.16972	0.0528752	0.0416937	0.00318289	0.0212959	0.00726486	0.00800453	0.0411093	0.0108894	0.0052668	0.0372298	0.0374746	0.00383954	0.00533348	0.0134588	0.00488801	0.0138054	0.00662033	0.0231358	0.0649399	0.00639149	0.0156861	0.0350298	0.0369169	0.0153754	0.0134593	0.0338289
AGCGAGACGTGAAGGC-1	0.0323205	0.0017224	0.00209165	0.00793662	0.00874966	0.0114603	0.0104096	0.00570333	0.0367766	0.0543842	0.0134521	0.0519365	0.0109337	0.0191	0.0352943	0.00861688	0.00492786	0.0427456	0.0152825	0.00519045	0.00857671	0.0330761	0.00861936	0.0389002	0.0199366	0.0103134	0.181279	0.0159992	0.0198716	0.125541	0.0328122	0.0431025	0.048519	0.0344186
AGCGATGCGCCTAATA-1	0.00697978	0.00288707	0.00226069	0.000383946	0.00888104	0.0822643	0.0555706	0.0745782	0.217645	0.0267939	0.00150935	0.0137613	0.0109282	0.00947744	0.0372173	0.0111201	0.011436	0.0119428	0.0326253	0.0121215	0.0162823	0.0172082	0.0121167	0.0278117	0.0125115	0.00416551	0.0773283	0.0177408	0.018559	0.0484837	0.0194401	0.00771153	0.0115723	0.0786839
AGCGCATAATGAATCG-1	0.00101887	0.0178487	0.0115015	0.00291526	0.0165268	0.140649	0.113196	0.184325	0.0844287	0.0220795	0.00227824	0.0042335	0.00791739	0.029117	0.0257191	0.0104364	0.0175089	0.0142907	0.0208176	0.0404046	0.0172366	0.0293767	0.00517067	0.00355342	0.00890601	0.0220616	0.00254241	0.00649145	0.0238315	0.00260849	0.0523018	0.0184921	0.011083	0.0291313
AGCGCGGGTGCCAATG-1	0.0207356	0.0022486	0.00593406	0.00258801	0.0518908	0.0114115	0.0018453	0.00756998	0.0154567	0.0301133	0.0428195	0.0157957	0.00750947	0.0105923	0.01777	0.0130199	0.010082	0.012315	0.018004	0.0206878	0.0027094	0.029265	0.00471323	0.0340657	0.0331318	0.0171993	0.171651	0.0139928	0.0145909	0.106841	0.0921768	0.0753409	0.0679956	0.017937
AGCGCTTATGGGCAAG-1	0.0919664	0.0348999	0.193547	0.0265433	0.00783866	0.0052524	0.000964076	0.003938	0.0606184	0.0606648	0.00220086	0.0468659	0.000519196	0.00189256	0.0106001	0.132801	0.0026844	0.112634	0.00138683	0.000847501	0.000580437	0.0162164	0.00269532	0.0026022	0.00182441	0.1003	0.000707322	0.00105451	0.00737613	0.00110578	0.0441477	0.0112892	0.00115702	0.0102777
AGCGGACACTTCGTAG-1	0.00826515	0.00488443	0.00280234	0.00133129	0.00939416	0.0584989	0.15391	0.0750858	0.0597947	0.0381254	0.00536387	0.0547882	0.0229527	0.0172902	0.0741964	0.00777823	0.00986579	0.027822	0.013282	0.0127613	0.0154479	0.00596162	0.00917352	0.0497434	0.00889063	0.0104051	0.0612303	0.0112428	0.0148111	0.0441895	0.0153915	0.00821947	0.0146484	0.0724515
AGCGGCGGTTAGCGGT-1	0.0203687	0.00727589	0.0152352	0.00346234	0.0162505	0.0996728	0.0522905	0.0956759	0.111299	0.0607134	0.00658431	0.00798968	0.00865984	0.00974663	0.0285372	0.00446352	0.0304454	0.0221653	0.0255326	0.0248512	0.012971	0.0342341	0.00886552	0.00942075	0.0168648	0.013322	0.0391508	0.0123305	0.0211699	0.0321624	0.0892748	0.0137917	0.0189752	0.0262463
AGCGGGAAGGGTCCAT-1	0.0329602	0.00138693	0.00138761	0.000928123	0.00674442	0.0517941	0.040313	0.0352919	0.0573795	0.0957879	0.00983103	0.0388625	0.0158995	0.0221075	0.0655483	0.00268026	0.00716854	0.0227358	0.0451139	0.02026	0.0211021	0.0188489	0.00990567	0.0275772	0.0120032	0.00519843	0.108418	0.011394	0.0118601	0.0892388	0.0329171	0.0128268	0.0333597	0.0311684
AGCGGGTCTGACACTC-1	0.00168882	0.00613165	0.0237061	0.0129387	0.0170636	0.0409377	0.00885016	0.0290706	0.0582259	0.0161241	0.0571681	0.0167521	0.010032	0.0172832	0.0261089	0.0028497	0.0117204	0.0329316	0.0148313	0.0103151	0.0131082	0.0261128	0.00710939	0.0216674	0.0274828	0.025169	0.12076	0.0191801	0.0437578	0.0935329	0.042125	0.0412611	0.0722661	0.0317376
AGCGGTTGAGATGTAC-1	0.01564	0.00251082	0.0061525	0.00589691	0.0438349	0.0344366	0.0576062	0.0134746	0.0550036	0.107109	0.0503115	0.074782	0.0587957	0.00408766	0.0427275	0.0219092	0.0133911	0.0728875	0.00491009	0.0157837	0.0353144	0.0168638	0.017333	0.0274591	0.00484039	0.00403399	0.00500442	0.0094822	0.0107581	0.00521866	0.0872045	0.0178933	0.00643986	0.0509031
AGCGGTTGCCGCTCTG-1	0.131826	0.0434614	0.27401	0.0341328	0.00049591	0.005036	0.000609752	0.00294547	0.0264071	0.00121358	0.00325482	0.0521931	0.00150463	0.000753454	0.00917464	0.121852	0.00397861	0.12422	0.00167184	0.000810825	0.00180221	0.00705922	0.00346088	0.0016217	0.00152681	0.0904245	0.000200103	0.000745941	0.00620856	0.000187023	0.0301161	0.00645324	0.000859079	0.00978333
AGCGTACGAGAGCTAG-1	0.0536955	0.00445033	0.0107574	0.0107656	0.0109804	0.0101308	0.00727432	0.00731159	0.0132175	0.0390505	0.0181828	0.0601753	0.00670465	0.00765545	0.0420373	0.0151966	0.00293996	0.0148859	0.0136454	0.00184867	0.00319609	0.00780136	0.00359237	0.040975	0.0268001	0.0179641	0.224591	0.0155936	0.00980956	0.142153	0.0177123	0.0401802	0.0653909	0.0333344
AGCGTAGCGCTAGACC-1	0.0615656	0.00364605	0.00696134	0.00584908	0.0113836	0.046589	0.0872722	0.0885647	0.0144344	0.121647	0.00475993	0.049283	0.00228253	0.00622205	0.0111799	0.0164662	0.00349818	0.0365952	0.00968236	0.00141871	0.000885139	0.00449781	0.00360089	0.0312659	0.0137609	0.0419218	0.101772	0.00769164	0.00660031	0.0603467	0.0514134	0.0372422	0.026611	0.0230891
AGCGTCTGAACCCGCA-1	0.00823204	0.00113861	0.000164652	0.00231035	0.00940311	0.00215259	0.0010587	0.00160137	0.0121191	0.0139429	0.0145256	0.0183456	0.000349074	0.00746064	0.00514718	0.00317183	0.00144158	0.00654772	0.0189582	0.000958222	0.0002793	0.00424757	0.0018006	0.0400572	0.0212579	0.00957703	0.444465	0.010658	0.00605354	0.226173	0.0086999	0.0352722	0.0506964	0.0117332
AGCGTGGTATTCTACT-1	0.0621688	0.0190105	0.0942222	0.0205466	0.0129347	0.104898	0.0118484	0.108806	0.0631144	0.0114252	0.00214881	0.00431674	0.00788907	0.00896985	0.0134946	0.0343211	0.030297	0.0180419	0.0172297	0.0368048	0.00602498	0.0834869	0.0069656	0.000794193	0.00926241	0.0448176	0.000530737	0.00771594	0.0305999	0.0010289	0.0775731	0.0166928	0.00701318	0.0250055
AGCGTTCCGATTTAAA-1	0.0224678	0.000591728	0.001402	0.000549085	0.00569108	0.0212606	0.046509	0.00672879	0.0721542	0.158252	0.0282997	0.109513	0.077582	0.0247263	0.043156	0.0116357	0.00757905	0.0936999	0.00430958	0.00929338	0.0169935	0.00832575	0.0155639	0.044489	0.00455864	0.00138571	0.0139991	0.0112249	0.00906528	0.0126123	0.0562425	0.0166561	0.00564312	0.0378394
AGCTAACAAGCAATGT-1	0.00217087	0.0180917	0.0154091	0.00355302	0.0143489	0.103044	0.0660419	0.102323	0.0855567	0.0203851	0.01178	0.00733041	0.0150508	0.0253765	0.0519599	0.00198831	0.0220148	0.0229278	0.0302469	0.02416	0.0117111	0.0290942	0.0107199	0.01569	0.0221798	0.0134043	0.0479626	0.0172903	0.0304611	0.0415893	0.0335906	0.0141102	0.0341529	0.0342842
AGCTAAGCTCCGTCCG-1	0.0204042	0.00183486	0.00306936	0.00167747	0.00850881	0.0418344	0.0604529	0.0324946	0.08616	0.0540316	0.00578629	0.051183	0.023559	0.0206174	0.0343604	0.0171035	0.0124577	0.0639732	0.0129795	0.0116538	0.00980729	0.00955007	0.0132737	0.0385433	0.0157089	0.00795827	0.106292	0.0115986	0.0116084	0.0616284	0.0273289	0.0274143	0.0374132	0.0577329
AGCTAAGTACGCAGGC-1	0.0347792	0.0138539	0.0354787	0.0123471	0.0153066	0.0765962	0.17325	0.134435	0.0255464	0.0547309	0.00165494	0.0219366	0.0146655	0.00872699	0.0343664	0.0471188	0.00408431	0.0636699	0.00155564	0.00653907	0.00410527	0.00537444	0.00602296	0.0171131	0.00334151	0.0708682	0.0107335	0.00364437	0.0148582	0.00338228	0.0240855	0.0288871	0.00466141	0.0222799
AGCTAGAAGCAGAAGT-1	0.00285185	0.00324081	0.00613577	0.00233624	0.016369	0.0491924	0.0750651	0.0175784	0.0351404	0.0586751	0.0435859	0.074737	0.064198	0.00989055	0.0628493	0.0247746	0.01967	0.0636571	0.00214484	0.0265105	0.0285844	0.015039	0.0317521	0.0483425	0.00697027	0.00250283	0.0355338	0.0138361	0.0120811	0.0207423	0.0306755	0.0164393	0.0118694	0.0670286
AGCTATTTAATCCAAC-1	0.0111209	0.000239743	0.000782708	0.000620449	0.210855	0.00487148	0.000829588	0.00306749	0.026939	0.0646012	0.025946	0.0387688	0.035434	0.0589121	0.0151993	0.00399595	0.00716527	0.0231029	0.0216699	0.003387	0.0183299	0.0555477	0.00605993	0.00816201	0.0132823	0.00354581	0.029262	0.0104254	0.0186093	0.0255604	0.165873	0.0421523	0.0216633	0.0240179
AGCTCCTTCGCACATC-1	0.00901292	0.00683124	0.0389446	0.00278478	0.0217274	0.12272	0.0212166	0.0895597	0.105637	0.0234338	0.012607	0.000920366	0.00879757	0.0136682	0.0446724	0.00133707	0.0443316	0.0305153	0.0445849	0.0612279	0.0346432	0.0534065	0.0126705	0.00164717	0.0171387	0.0103226	0.000996546	0.0133443	0.0322	0.00333927	0.0672426	0.0168677	0.0104649	0.0211858
AGCTCTAGACGTTCCA-1	0.00776949	0.00710437	0.0239278	0.00399532	0.0291894	0.117523	0.162236	0.197983	0.054053	0.05021	0.00239454	0.00794811	0.0079415	0.00495107	0.0204	0.0388492	0.015443	0.0252914	0.00403553	0.0374626	0.00861423	0.0154422	0.00431339	0.00681737	0.0034537	0.0228547	0.00465184	0.00381329	0.0131629	0.00222198	0.067627	0.00792173	0.00418263	0.0162148
AGCTCTTCCCAGTGCA-1	0.0259317	0.00958785	0.0234895	0.00377193	0.358852	0.00523244	0.000541023	0.0035058	0.0177757	0.00355976	0.0124946	0.00693471	0.000966431	0.0037984	0.00780668	0.0344999	0.00653821	0.0262291	0.00372356	0.014864	0.00330181	0.0245001	0.00551308	0.0123155	0.0238052	0.0147251	0.0715401	0.00994296	0.0283983	0.038415	0.0934702	0.0443967	0.041338	0.0182352
AGCTCTTCGTAACCTT-1	0.0170568	0.0055951	0.010246	0.00106145	0.0203573	0.113662	0.0760024	0.134396	0.138652	0.0646745	0.000762061	0.00976769	0.0137984	0.0240378	0.0337202	0.00127622	0.0202785	0.0153905	0.0410913	0.0246803	0.00655852	0.0131209	0.00659521	0.006757	0.0105202	0.00642634	0.0188067	0.0088301	0.0189667	0.0169926	0.0755948	0.00779266	0.00890414	0.0276271
AGCTCTTTACTCAGTT-1	0.11152	0.0205663	0.0352514	0.00923353	0.00846476	0.0629978	0.119791	0.118519	0.0159922	0.0454881	0.000913929	0.037887	0.00296606	0.0078572	0.0204417	0.110532	0.00303235	0.0590142	0.00278073	0.0013389	0.00133753	0.00419676	0.002691	0.0134942	0.00351116	0.057087	0.0327253	0.00308215	0.00668685	0.0161551	0.0249322	0.0123101	0.00611406	0.0210886
AGCTGAAGTAAACCAA-1	0.11418	0.102931	0.072586	0.0117548	0.173757	0.0361386	0.00277322	0.0228637	0.0251122	0.00339668	0.0122921	0.00550748	0.00252817	0.0125487	0.024733	0.0664296	0.0161771	0.0192815	0.00901382	0.0165207	0.0087374	0.0174639	0.00417212	0.00209026	0.0111679	0.0481339	0.00093502	0.00615822	0.012216	0.00122843	0.0846787	0.0197889	0.00991241	0.022791
AGCTGCTGTGCCGAAT-1	0.0303733	0.00459803	0.00855642	0.00331269	0.0292231	0.0640068	0.163968	0.135466	0.0411421	0.0715974	0.00490468	0.0386846	0.01413	0.0073588	0.0306543	0.0169936	0.00318271	0.0505851	0.00465094	0.00293951	0.00532947	0.00653755	0.00490673	0.0278254	0.00810041	0.0220794	0.0692916	0.00547534	0.0130832	0.033565	0.0214349	0.0164952	0.0126564	0.026891
AGCTGTAACCTCAATC-1	0.00109435	0.00636734	0.0086159	0.00120496	0.0210313	0.103514	0.0217627	0.0729301	0.161224	0.00938181	0.00397092	0.0030298	0.00905182	0.0241925	0.0561109	0.00124071	0.022626	0.0262307	0.106415	0.0270451	0.0279805	0.0277527	0.0131699	0.00682822	0.021911	0.0105915	0.0235083	0.0134547	0.0328627	0.019849	0.0418681	0.0150283	0.0241637	0.0339916
AGCTTATAGAGACCTG-1	0.0166058	0.00352013	0.00234554	0.00406128	0.0143515	0.0133929	0.00226841	0.0112694	0.0176904	0.0328346	0.0188565	0.0186185	0.00127659	0.00641851	0.0117805	0.00334757	0.0106505	0.0256128	0.0229228	0.00778244	0.00161037	0.011142	0.0026268	0.0359216	0.0444595	0.0167648	0.274884	0.0166616	0.0112189	0.16189	0.0422091	0.0483059	0.0689292	0.0177692
AGCTTCAATACTTTGA-1	0.0443837	0.00445899	0.00579326	0.00166777	0.0115601	0.0330348	0.0685185	0.0580073	0.0238209	0.145402	0.0112222	0.0343046	0.00499111	0.00536411	0.0218196	0.0327456	0.0039586	0.0255338	0.00776422	0.00356611	0.00165767	0.00984398	0.00338964	0.0329344	0.0144772	0.030144	0.121111	0.0080496	0.00796865	0.0683049	0.0632269	0.0366658	0.0288864	0.0254224
AGCTTGATCTTAACTT-1	0.0358722	0.00409844	0.00451135	0.00198157	0.0170095	0.0611234	0.144046	0.129537	0.030745	0.0540643	0.00311297	0.0221932	0.00721375	0.0065732	0.0208034	0.0190717	0.00250911	0.0299	0.0162848	0.00145677	0.00115595	0.00759678	0.00320997	0.0221907	0.0102333	0.0358845	0.151991	0.00777071	0.00984852	0.0712776	0.00889851	0.0193232	0.0217442	0.0167676
AGGAAGCTGTCCGCCG-1	0.00533654	0.0123217	0.0139639	0.0023009	0.0109415	0.0907181	0.0612667	0.0767559	0.130297	0.0429333	0.00744398	0.0205339	0.00883495	0.0389835	0.0473252	0.00252001	0.0127819	0.0146741	0.0264632	0.0328201	0.0101589	0.0422749	0.00920359	0.00596602	0.014324	0.0162544	0.0175615	0.0116057	0.0269696	0.0168746	0.067524	0.0210462	0.028948	0.052072
AGGACAGTCGAATCCC-1	0.0663586	0.0264153	0.158601	0.0401519	0.0126544	0.070559	0.0506427	0.075711	0.0215424	0.0156187	0.00116629	0.00954627	0.00488543	0.00573962	0.0169844	0.0976551	0.00953497	0.0485117	0.00459728	0.00850339	0.0087153	0.0502644	0.00396118	0.00162946	0.00417661	0.0815131	0.00089308	0.00318802	0.0177876	0.000749125	0.0539712	0.00835823	0.00301802	0.0163948
AGGACATCGCACGTCG-1	0.00793251	0.00366802	0.00399436	0.0117947	0.0117349	0.014614	0.00236245	0.00830171	0.0209099	0.0135894	0.0191005	0.0119605	0.000832261	0.00846342	0.0183468	0.0073286	0.008972	0.0102863	0.0183933	0.0167678	0.00096488	0.0124836	0.00410246	0.0396992	0.0405592	0.0198385	0.247621	0.0226155	0.0195335	0.159952	0.049756	0.0487112	0.0914722	0.023337
AGGACGACCCATTAGA-1	0.030348	0.0118763	0.0382577	0.0323943	0.0261226	0.0907997	0.174288	0.184216	0.0121451	0.0784145	0.000285241	0.0128221	0.00576639	0.00514195	0.0180657	0.0541821	0.00437607	0.0224529	0.00187802	0.00201144	0.00178267	0.0066069	0.00460878	0.0107902	0.00191169	0.0940119	0.0100534	0.00199322	0.00815616	0.00281282	0.0176038	0.0164439	0.00419566	0.0131848
AGGACGCTCGATGTTG-1	0.0352229	0.00173476	0.00236076	0.000562053	0.0118422	0.0263356	0.0987165	0.0535713	0.0214078	0.272106	0.00249396	0.0578558	0.023575	0.00455785	0.0220589	0.0314291	0.00354331	0.0478317	0.00382631	0.00112293	0.00273729	0.00749944	0.00337778	0.0306097	0.00376823	0.0278227	0.0389756	0.00404094	0.00410875	0.0239486	0.0744812	0.0337686	0.00561787	0.0170884
AGGAGCGTTTATTATC-1	0.0236482	0.00512669	0.0117627	0.00132773	0.00650039	0.0669728	0.0755738	0.0691021	0.066814	0.0911629	0.00145698	0.0345707	0.00670481	0.00437618	0.0695037	0.0097666	0.00796761	0.0300502	0.0105389	0.00332693	0.0373921	0.0226803	0.00651751	0.0130899	0.00536107	0.00817326	0.0196818	0.00642745	0.00967553	0.0179833	0.0267084	0.0181425	0.00584936	0.206064
AGGAGGCCTTCGCGCG-1	0.00411194	0.00975619	0.050247	0.014337	0.0306202	0.110468	0.0556999	0.0973955	0.0456067	0.0244272	0.0187681	0.00267201	0.0185455	0.0223786	0.0454249	0.00334162	0.0242788	0.0189539	0.0293114	0.0424975	0.0147571	0.0601347	0.00968974	0.00369906	0.0161778	0.0161537	0.00348392	0.00990943	0.029078	0.0036862	0.096716	0.0208385	0.0163459	0.0304878
AGGATAAAGTCGGGAT-1	0.0013559	0.0130348	0.0295202	0.0021222	0.0204863	0.131396	0.0226856	0.0843696	0.135606	0.00921307	0.00709038	0.0021012	0.0162811	0.0192437	0.0436152	0.00235941	0.0349876	0.00428431	0.0451685	0.0664783	0.0156995	0.0400609	0.012242	0.00175996	0.0222712	0.00726114	0.00279638	0.0233963	0.0502774	0.00863098	0.0597413	0.00992738	0.0128344	0.0417021
AGGATATAGGGATTTA-1	0.00234181	0.00725415	0.0187407	0.00369721	0.138174	0.0518234	0.00915265	0.0347841	0.0286561	0.0138421	0.0166787	0.00534709	0.0147462	0.0223562	0.0162431	0.0148603	0.0162402	0.0203714	0.00983706	0.0311866	0.013739	0.0610239	0.00949057	0.0119832	0.0252459	0.0104209	0.0711111	0.0131532	0.0312318	0.0494587	0.0876899	0.0698342	0.0434765	0.0258084
AGGATATCCGACTGCA-1	0.0859419	0.0161472	0.0355726	0.00575713	0.0127933	0.0645466	0.0903738	0.0812017	0.119574	0.0356984	0.00605625	0.0203297	0.0137551	0.00495637	0.0241118	0.0343123	0.00717867	0.0525778	0.00522221	0.0065872	0.00483342	0.0207956	0.00487854	0.0122195	0.00856521	0.0373899	0.0393168	0.00588265	0.0194143	0.0202139	0.0440531	0.0114782	0.0120252	0.0362397
AGGATCACGCGATCTG-1	0.0215234	0.00710312	0.0132613	0.002567	0.0148352	0.0972222	0.0520551	0.0867902	0.0942283	0.0588675	0.0235626	0.0283152	0.0198383	0.036886	0.0286955	0.00174788	0.015362	0.0123132	0.0153612	0.0115629	0.00777381	0.0227752	0.00827005	0.00847424	0.0148353	0.0174246	0.0371546	0.0140109	0.0421827	0.0304386	0.0913432	0.0141546	0.0173637	0.0317004
AGGCAAAGAGGAATCA-1	0.147049	0.0172515	0.0561368	0.0165622	0.00913818	0.0247229	0.0097024	0.0184222	0.0251255	0.0312336	0.00329352	0.0430289	0.00339394	0.00570927	0.0210996	0.0582134	0.00387638	0.0623296	0.0124441	0.00347944	0.00262201	0.0115769	0.00403148	0.0207194	0.0140136	0.0402891	0.12519	0.00880806	0.00851225	0.082635	0.037167	0.0183054	0.0329614	0.0209563
AGGCAGATGCGTAAAC-1	0.175687	0.0493643	0.160926	0.0467714	0.00442255	0.0297611	0.00385584	0.0172985	0.0303503	0.00262763	0.00575765	0.00928735	0.00178332	0.0045947	0.0174956	0.131911	0.018051	0.0435991	0.00329747	0.00758294	0.0106084	0.0248531	0.00458645	0.00114126	0.00415127	0.0680694	0.000378631	0.00241208	0.0122094	0.00058068	0.0720505	0.0130336	0.00350253	0.0179974
AGGCAGGGAGCGTACT-1	0.00805825	0.00256327	0.00382649	0.000608097	0.0126333	0.0988135	0.0342613	0.068674	0.214254	0.0211111	0.00325634	0.0155952	0.0170925	0.0231567	0.0383464	0.00180641	0.0157226	0.00943254	0.0314885	0.03	0.0131119	0.0223385	0.0129039	0.00678232	0.0153836	0.00492366	0.0572868	0.0125791	0.0225782	0.0388356	0.0608239	0.0074422	0.0325637	0.0417463
AGGCATTGTCGTAGGG-1	0.0153777	0.00515369	0.0127559	0.00660885	0.0216313	0.0601769	0.0184281	0.04203	0.0807088	0.0963362	0.00787007	0.0126764	0.0357422	0.0202818	0.0425357	0.00209372	0.0379671	0.0181442	0.0272055	0.0428509	0.0388309	0.0362305	0.017338	0.0129412	0.0179123	0.00619682	0.0471234	0.0159553	0.0214513	0.037383	0.0761448	0.0148378	0.0161038	0.0349757
AGGCCACCCGTTATGA-1	0.00291836	0.00482414	0.0132261	0.00446877	0.0192972	0.0957546	0.145958	0.129798	0.0338543	0.0617035	0.010377	0.037639	0.0334893	0.0124158	0.0457068	0.0421225	0.0104482	0.0887224	0.00413191	0.0116215	0.0152053	0.00774192	0.0110286	0.029433	0.00296499	0.0173099	0.00963088	0.00658945	0.00906222	0.00546052	0.0177858	0.0115245	0.00548852	0.0422971
AGGCCCATTGTACAGG-1	0.0170004	0.00637699	0.0104444	0.00339318	0.024946	0.0822371	0.054651	0.0865216	0.0852938	0.0392726	0.00412384	0.0202337	0.0204827	0.0139179	0.0571055	0.00921121	0.0104716	0.0321876	0.125713	0.0281901	0.0294377	0.0148998	0.00880966	0.0121071	0.0112579	0.0102104	0.0346089	0.011681	0.0280901	0.0238019	0.0315881	0.0112389	0.0117477	0.0287472
AGGCCCTAGAACGCCA-1	0.00792372	0.0112954	0.0242101	0.00864472	0.0212307	0.0917377	0.0990228	0.129034	0.0392169	0.0394749	0.0107798	0.00919776	0.0101777	0.0261275	0.0353188	0.00667179	0.0164636	0.0521944	0.0153523	0.0149381	0.0113103	0.0448823	0.0118621	0.00803971	0.0110807	0.0258974	0.0288262	0.0115559	0.0322752	0.0250894	0.0591372	0.013947	0.0146762	0.0324078
AGGCCTATCATACCAA-1	0.0267051	0.00211645	0.00457898	0.00309844	0.00989543	0.0237962	0.00554945	0.016155	0.0428182	0.0499831	0.0148019	0.0171027	0.00518132	0.0173604	0.0122872	0.0116154	0.00705488	0.0254513	0.0311239	0.0162662	0.00279189	0.0403383	0.00650099	0.0306732	0.0303498	0.0151322	0.177736	0.0197206	0.0222188	0.135598	0.0464621	0.0354526	0.0613068	0.0327779
AGGCCTGAGAATCTCG-1	0.0826269	0.0404148	0.164265	0.0248273	0.00928761	0.0453307	0.058441	0.0647456	0.0319805	0.0283448	0.00273738	0.0282262	0.00311066	0.00971216	0.0202698	0.0915845	0.00605402	0.0559921	0.00192755	0.00441282	0.00179947	0.0108834	0.00353293	0.00953883	0.00423957	0.114681	0.00814673	0.00227054	0.00958654	0.00330738	0.0273679	0.0162084	0.00366811	0.0104789
AGGCGGTTTGTCCCGC-1	0.027851	0.00704767	0.00478806	0.00343077	0.0135127	0.0680274	0.102278	0.0987843	0.0393911	0.0776135	0.0146523	0.0411649	0.0145906	0.0253539	0.0639172	0.00409729	0.00768913	0.0459717	0.0375981	0.00755239	0.0146087	0.016276	0.00641177	0.0210235	0.00888183	0.00933677	0.0652977	0.00916964	0.0127267	0.0456093	0.0280539	0.0131109	0.0132891	0.0308925
AGGCGTCTATGGACGG-1	0.0175337	0.0144534	0.0328531	0.0192493	0.0133332	0.0983684	0.185226	0.180679	0.0128042	0.0943116	0.00137516	0.0189074	0.00384959	0.00615072	0.0260249	0.0418653	0.00235873	0.0316573	0.0015275	0.0168621	0.00291922	0.0121321	0.00283508	0.012454	0.00250353	0.061773	0.0112706	0.00252673	0.0129139	0.00376493	0.0172305	0.0175075	0.00439825	0.0163803
AGGCTATGGTTAGCTT-1	0.00763389	0.012242	0.0235227	0.00547738	0.0299941	0.0978487	0.25561	0.21179	0.0142624	0.0610284	0.000982439	0.0151472	0.00681731	0.00355274	0.0186182	0.0312234	0.00352487	0.0243476	0.000987862	0.00231422	0.000531063	0.00501349	0.00302903	0.0179876	0.00176993	0.0491271	0.01664	0.00217039	0.014289	0.00481582	0.0248456	0.0171364	0.00382166	0.0118978
AGGCTTAAGTTGCACA-1	0.00552217	0.00309692	0.00374883	0.000685469	0.0121922	0.0704655	0.170915	0.113445	0.117633	0.0506247	0.0025969	0.0330052	0.0185933	0.00656354	0.0367892	0.0153229	0.00443393	0.0242159	0.00750024	0.00874014	0.0293624	0.00657979	0.00579164	0.0229994	0.00918346	0.0346032	0.0533035	0.00605387	0.0173175	0.0275349	0.00877706	0.00995752	0.00821583	0.0542298
AGGCTTCCCGAAGAAG-1	0.00180793	0.00503356	0.0225027	0.00328156	0.0184652	0.125927	0.0164026	0.085715	0.153866	0.0175547	0.00926645	0.000966671	0.0185902	0.0274004	0.0301782	0.00359424	0.0319927	0.0130301	0.0335303	0.033899	0.0133669	0.0437617	0.0103599	0.00183461	0.0239765	0.0157417	0.00236872	0.0255688	0.0300087	0.00535499	0.098991	0.0143681	0.0196714	0.0416221
AGGCTTGCTAGACACC-1	0.0334872	0.00113106	0.00387312	0.00346451	0.0134074	0.0168086	0.00353939	0.0104922	0.0703575	0.121941	0.0248295	0.035555	0.0203291	0.0156493	0.0225046	0.00237265	0.0106444	0.020619	0.0154856	0.00588801	0.0200312	0.0465192	0.00796436	0.023314	0.022746	0.00676964	0.0998771	0.016837	0.016001	0.0710262	0.108555	0.0356262	0.0380832	0.0342708
AGGGAAACGAGGTACT-1	0.174675	0.00868448	0.0294591	0.0116273	0.332632	0.00232182	0.000250237	0.0012651	0.0198737	0.003185	0.0132795	0.0197187	0.00213196	0.00744174	0.0185867	0.0562599	0.00342407	0.0281627	0.0141426	0.000652327	0.00662499	0.0185357	0.00358264	0.00100772	0.00437185	0.0271498	0.000122347	0.00396475	0.018255	0.000294595	0.120521	0.0251614	0.00390237	0.0187321
AGGGACAGCACGGCGG-1	0.0128211	0.0016044	0.00101669	0.00262071	0.00905197	0.00784698	0.00176748	0.00574825	0.01613	0.0187938	0.0203676	0.0181536	0.00228095	0.0057365	0.00752906	0.00579583	0.00341441	0.0204719	0.0154008	0.012221	0.00452814	0.0114109	0.00334844	0.0456425	0.0412272	0.0200244	0.292617	0.017051	0.00885289	0.170287	0.0250013	0.0669337	0.0821404	0.0221623
AGGGACCGGCTGCGTT-1	0.00444938	0.0109326	0.0381344	0.00802286	0.0467036	0.0506028	0.0422008	0.0513183	0.0322995	0.0201204	0.0195121	0.0142849	0.00753329	0.0179104	0.0145785	0.00251058	0.013004	0.0252564	0.0305792	0.0150803	0.00244069	0.0412617	0.00753103	0.0148015	0.0207824	0.0223303	0.108852	0.0175765	0.0248577	0.088351	0.0665003	0.0528553	0.0466684	0.0201568
AGGGACTCTACGCGAC-1	0.0287738	0.00217148	0.00554885	0.00035636	0.0136489	0.104214	0.0219163	0.0713792	0.235015	0.0629612	0.00199147	0.00172916	0.00490289	0.027168	0.0234702	0.00169825	0.0365184	0.00628683	0.0344571	0.043018	0.0391403	0.0364166	0.0107677	0.00251343	0.0102967	0.00582024	0.00129345	0.00776068	0.012437	0.00321871	0.0940636	0.00575591	0.00651611	0.036774
AGGGAGACATACTTCG-1	0.0877998	0.00795609	0.0238533	0.00782523	0.0297861	0.0575674	0.0621077	0.0784663	0.0257404	0.124622	0.00970643	0.0313381	0.0158531	0.0146346	0.0240923	0.0121134	0.0125761	0.0350098	0.00475346	0.0122265	0.00507065	0.0409487	0.00687838	0.0131931	0.0106372	0.01642	0.0266753	0.00866295	0.013945	0.0186265	0.1081	0.0140318	0.0114148	0.0273677
AGGGCAGCGGCGTGGT-1	0.0163612	0.00190007	0.0025537	0.00109456	0.0154252	0.0648718	0.088963	0.0246524	0.0538035	0.0587508	0.0157634	0.0916131	0.0346957	0.0123704	0.0834041	0.00692346	0.0120035	0.0497251	0.00352911	0.0175519	0.0344003	0.0145341	0.0237683	0.0632014	0.00608848	0.00270286	0.046221	0.0114479	0.00958988	0.0258148	0.022889	0.00762668	0.0134796	0.0622797
AGGGCGAGCAGCTGAT-1	0.0102326	0.00825748	0.0109603	0.00402392	0.0173784	0.0487328	0.0325619	0.044921	0.042844	0.0266431	0.0219544	0.0239911	0.0129777	0.0177008	0.0207279	0.00560006	0.0101591	0.0389008	0.017141	0.00465056	0.0133155	0.0342163	0.00945992	0.0329212	0.0230464	0.0209193	0.155169	0.0187487	0.0310136	0.101652	0.0401029	0.0337564	0.0421813	0.0231384
AGGGCGTGATCGGCTA-1	0.00677277	0.0106894	0.0132881	0.007592	0.0211572	0.0735213	0.0167673	0.0591479	0.0493151	0.0201627	0.0102293	0.00753775	0.0303255	0.0310802	0.041424	0.006058	0.0178454	0.0179292	0.0431293	0.0358519	0.0165977	0.0354439	0.0100244	0.0131979	0.0234887	0.0181912	0.0884735	0.016935	0.0280842	0.0643424	0.065543	0.0329208	0.0360772	0.030856
AGGGCTGCAGTTACAG-1	0.00722989	0.00368444	0.00801052	0.0024481	0.0106661	0.130964	0.0676364	0.0851557	0.115779	0.0246787	0.00613915	0.00866788	0.00861187	0.0082206	0.0208852	0.00335152	0.0160893	0.0149191	0.0097637	0.0232588	0.0230477	0.0223785	0.0139028	0.0225889	0.0149088	0.00883449	0.0661962	0.0272301	0.0270956	0.0564548	0.0278522	0.00992042	0.01571	0.08772
AGGGTCAGAGCACTCG-1	0.0422613	0.00124839	0.00214548	0.00107674	0.00944383	0.0531812	0.0502775	0.0279786	0.0560832	0.137282	0.0106487	0.0557617	0.0322884	0.0139221	0.0760651	0.00745633	0.00997824	0.0414442	0.0483948	0.0161511	0.0339038	0.0140172	0.00936604	0.0286562	0.00829217	0.00321948	0.0526362	0.010076	0.0101517	0.0403016	0.043376	0.0130262	0.0135068	0.0263816
AGGGTCAGTAACCCTA-1	0.0484172	0.00255033	0.00768897	0.00222183	0.0109119	0.0392751	0.164147	0.0675751	0.0194969	0.236697	0.00824676	0.0392425	0.0112701	0.00394879	0.0212002	0.0177816	0.0102436	0.0184167	0.00263075	0.0223989	0.00134693	0.00575549	0.00429023	0.0185577	0.00402687	0.0311003	0.0115962	0.00412732	0.0065304	0.0118708	0.0946812	0.0295041	0.0029087	0.0193426
AGGGTCGATGCGAACT-1	0.0326673	0.00967686	0.030031	0.00920119	0.0135923	0.0919874	0.0386127	0.0800525	0.0409306	0.0412493	0.0102788	0.00639271	0.0107689	0.0201415	0.0340201	0.00402215	0.0342471	0.0134752	0.0470432	0.0198247	0.00352398	0.0431163	0.0143425	0.00952979	0.0227599	0.0211325	0.0443562	0.0207235	0.0391159	0.0348479	0.0912708	0.0146468	0.0251722	0.0272462
AGGGTGCCGTTCTTTA-1	0.0380105	0.000790858	0.000890398	0.00184042	0.0124934	0.00721888	0.00225074	0.00448268	0.0288092	0.106103	0.0273514	0.0228614	0.00656354	0.00961552	0.0149097	0.00998871	0.00502522	0.0142222	0.0287281	0.00300284	0.00277962	0.0110675	0.00623963	0.0496764	0.0266193	0.00854266	0.20727	0.019434	0.0102528	0.163153	0.0398897	0.0315724	0.0492963	0.0290492
AGGGTGCTCTCGAGGG-1	0.00967092	0.0035548	0.00560053	0.00954034	0.0116095	0.0106863	0.00182307	0.00733868	0.0198547	0.0183513	0.032468	0.00950565	0.00346274	0.0100356	0.0133816	0.00887711	0.0107062	0.0119786	0.0210456	0.0124471	0.00137698	0.0356356	0.00500625	0.0408016	0.0349866	0.0146747	0.209297	0.0252043	0.0144088	0.163275	0.0590633	0.065907	0.0773484	0.0210764
AGGGTTCAGACGGTCC-1	0.0557927	0.00156326	0.00199439	0.00107306	0.0106879	0.0312052	0.0260129	0.0185544	0.0726736	0.141654	0.00314844	0.0555757	0.0158688	0.0215717	0.0452701	0.0040646	0.010664	0.0166753	0.0547134	0.0148276	0.0378133	0.0148257	0.0123269	0.0339155	0.0129287	0.00329006	0.062586	0.0168876	0.0120227	0.0528367	0.0610084	0.0155823	0.0167064	0.0436784
AGGGTTCCCTTTGGTT-1	0.0646762	0.000726848	0.00151239	0.00116719	0.0098804	0.0105682	0.00203277	0.00643994	0.0341291	0.157424	0.0194392	0.0280136	0.00793609	0.0242043	0.0228759	0.00223832	0.0151133	0.0202825	0.0112127	0.0161835	0.00265641	0.0204985	0.00492547	0.0257517	0.0195659	0.00625716	0.114268	0.0169361	0.0118907	0.0940691	0.123286	0.0370268	0.0390025	0.0278104
AGGGTTTAGTTCGGGA-1	0.0282964	0.00144806	0.00378343	0.000907636	0.0162968	0.0531698	0.123012	0.0964237	0.0779578	0.117235	0.00710417	0.056637	0.00744594	0.00731298	0.0167038	0.0108858	0.00261612	0.0320051	0.0166948	0.00222222	0.00496697	0.00473028	0.00371609	0.0210333	0.00678315	0.0105945	0.0971457	0.00757919	0.00848398	0.0624954	0.00911009	0.00977609	0.0135217	0.0619045
AGGTAACCTCCTATTC-1	0.0123323	0.00202878	0.00256309	0.00133653	0.0130033	0.0552582	0.0379589	0.0367104	0.0724646	0.0669426	0.00596148	0.0511289	0.0354945	0.0215261	0.058556	0.00230293	0.00722468	0.0236031	0.0581134	0.012476	0.039201	0.0170972	0.0111091	0.0336201	0.0141001	0.00452445	0.112946	0.01299	0.0134096	0.0624971	0.0299187	0.0220138	0.0182739	0.031313
AGGTACGATATTGCCA-1	0.0884455	9.42523e-05	0.000155199	8.5545e-05	0.00529427	0.00255108	0.000623019	0.00139328	0.0919128	0.238299	0.00931014	0.0299528	0.0110628	0.00736886	0.0188283	0.00327033	0.00856036	0.0424977	0.0173405	0.00678572	0.0265553	0.0108919	0.00478494	0.0194129	0.00773874	0.000717994	0.0562957	0.00870716	0.00267958	0.0773165	0.157041	0.00742627	0.00835579	0.028245
AGGTAGATCGAGATAT-1	0.00785072	0.00342147	0.0121423	0.0034521	0.0337262	0.0606108	0.0802248	0.0713165	0.0302951	0.0322179	0.0150691	0.0242554	0.0268595	0.0193692	0.0716334	0.0114559	0.0150603	0.0414241	0.011638	0.0156648	0.00955565	0.0214691	0.00879276	0.0274658	0.0161077	0.0134553	0.0791766	0.0110416	0.0187289	0.0421841	0.0641271	0.0216595	0.0419572	0.036591
AGGTAGGTACAAAGCT-1	0.0344135	0.00269661	0.00306326	0.00301555	0.0114569	0.0297132	0.0861332	0.0578482	0.029362	0.0470261	0.0118665	0.0571039	0.00635979	0.00608641	0.0179542	0.0141851	0.00204617	0.0448347	0.0102457	0.00122937	0.00333329	0.00482008	0.00444519	0.0359962	0.0144964	0.0168717	0.227908	0.013236	0.0138277	0.10043	0.00580162	0.0164124	0.0306052	0.0351753
AGGTATAATTGATAGT-1	0.160378	0.0974184	0.193036	0.0336725	0.00447423	0.0235073	0.00226894	0.0152661	0.0373372	0.00136915	0.00508241	0.0100652	0.00120043	0.00600688	0.0177715	0.0824954	0.0138449	0.0509335	0.0130173	0.00722212	0.00313277	0.0216483	0.00534977	0.00228273	0.00700715	0.0672	0.000751636	0.00418669	0.0224913	0.000920867	0.0565494	0.00889333	0.00650484	0.016714
AGGTCAGGTGAGAGTG-1	0.0142329	0.00517059	0.0206885	0.00373209	0.0171182	0.111443	0.049098	0.106092	0.0999782	0.0429135	0.00242959	0.0060624	0.0318197	0.0404433	0.051645	0.00242622	0.0211443	0.0583338	0.0241633	0.0334833	0.0344795	0.0228929	0.00898107	0.00518534	0.0103333	0.0106346	0.00255323	0.00904962	0.0187434	0.00459213	0.0755355	0.0101494	0.011431	0.0330208
AGGTCGCCACTTCGGT-1	0.0288176	0.00453243	0.00445353	0.00520412	0.0127394	0.0538434	0.0741688	0.0629772	0.0265324	0.0562218	0.011575	0.0266845	0.0211867	0.00938705	0.0447723	0.00618904	0.00703819	0.035694	0.0257536	0.00715488	0.00556192	0.0146372	0.00843593	0.0407162	0.0155192	0.0154903	0.135181	0.0122396	0.0127377	0.0892407	0.0310159	0.0220993	0.0351745	0.0370247
AGGTCGCGGAGTTACT-1	0.0256756	0.00439364	0.0215137	0.0137658	0.0085543	0.0546955	0.104486	0.0499806	0.0237553	0.0888726	0.0129517	0.0669707	0.0391398	0.00730522	0.0593582	0.036146	0.00837409	0.0875746	0.00296495	0.00947561	0.0202897	0.00575986	0.013258	0.0363376	0.0048354	0.0145164	0.0338118	0.00730627	0.0066474	0.0190333	0.0280328	0.0297173	0.0124054	0.042095
AGGTGGTGACCTTCGC-1	0.00237382	0.00657198	0.0178907	0.00398544	0.0218521	0.103936	0.215381	0.197493	0.0253861	0.0506291	0.000509611	0.00964129	0.00636449	0.0153195	0.018131	0.0398662	0.0105628	0.0167121	0.00826298	0.0159336	0.00741955	0.0209943	0.00513175	0.0105332	0.00398755	0.0579277	0.00929228	0.00569627	0.0222949	0.00389322	0.0280523	0.0186938	0.00516945	0.0141105
AGGTGTATCGCCATGA-1	0.0118173	0.00235522	0.00236166	0.000750083	0.0129019	0.0682242	0.2425	0.161761	0.0161784	0.0679588	0.00169659	0.0620394	0.00538195	0.00137127	0.01787	0.037737	0.000625839	0.0381486	0.00319497	0.000451875	0.00130746	0.000954727	0.00151513	0.0234192	0.00361527	0.0191938	0.12076	0.00304026	0.00465557	0.0399771	0.00213919	0.00769389	0.00855765	0.00784491
AGGTTACACCATGCCG-1	0.00281497	0.0164206	0.0401143	0.0016138	0.017809	0.156744	0.0254369	0.0871731	0.161788	0.0137937	0.00483076	0.000682578	0.00757053	0.0358851	0.0551368	0.000524963	0.0264262	0.00846231	0.0525467	0.0382212	0.00898432	0.0440951	0.00866715	0.00113006	0.0165023	0.00754569	0.000903676	0.0105591	0.020833	0.00225552	0.0738284	0.0117564	0.0113099	0.0276342
AGGTTCTCCTTTCCGG-1	0.0735617	0.0170663	0.0568414	0.0141051	0.0174101	0.0584877	0.104344	0.121627	0.031681	0.0602803	0.00146975	0.0591568	0.00529354	0.0036676	0.0126344	0.0413088	0.00325201	0.0455896	0.00598359	0.00119113	0.00118363	0.00927911	0.00426792	0.0250424	0.00606364	0.0598809	0.0411007	0.00451555	0.0120308	0.0201728	0.0371697	0.0174613	0.0148004	0.0120792
AGGTTGAGGCACGCTT-1	0.0309175	0.0129141	0.00955147	0.00258404	0.189244	0.0760942	0.0128008	0.0541948	0.0926403	0.0230829	0.0216958	0.00557292	0.0135971	0.0134453	0.0357292	0.00368209	0.0216846	0.0170106	0.0202495	0.0160878	0.0148332	0.0502462	0.00981999	0.00276182	0.0130745	0.0043325	0.0024326	0.0122904	0.0310205	0.0052417	0.131702	0.0172064	0.0103021	0.0219571
AGGTTTCACACACCTT-1	0.117867	0.0406196	0.165612	0.0314859	0.0081635	0.0438857	0.00862424	0.0305105	0.038197	0.0125902	0.00245305	0.0216924	0.00254587	0.00913507	0.0133809	0.110786	0.00532065	0.0571248	0.00353762	0.00488331	0.00388292	0.0167771	0.00378483	0.00200658	0.00407448	0.0974585	0.000692018	0.00248883	0.0120394	0.00124838	0.101612	0.0126036	0.00288902	0.0100271
AGTAACGTTCATCCTG-1	0.0483601	0.00176514	0.0029907	0.000734613	0.0203949	0.0353249	0.0210402	0.0222888	0.103598	0.171231	0.0239805	0.0231494	0.0108182	0.0087843	0.0481667	0.0084164	0.00922439	0.0346782	0.011543	0.0105661	0.0116319	0.0207009	0.00738053	0.0141608	0.0112114	0.00549813	0.0550653	0.0088811	0.0163344	0.0458753	0.109483	0.0149528	0.0119579	0.0498102
AGTAATCTAAGGGTGG-1	0.109844	0.0282222	0.186791	0.0285616	0.00980224	0.0442025	0.0478213	0.0550297	0.0243464	0.0257117	0.00361134	0.0174319	0.00265125	0.00504373	0.0227739	0.0976667	0.00750487	0.0525624	0.00127307	0.0052973	0.0027281	0.00825207	0.0035493	0.00322878	0.00303359	0.099835	0.00144331	0.00248933	0.00894517	0.000807148	0.0555269	0.00915486	0.00293566	0.0219214
AGTAATGTCTTGCCGC-1	0.00269363	0.00925413	0.024869	0.0110991	0.0271779	0.120298	0.168945	0.22659	0.0282655	0.0614223	0.00339048	0.00612963	0.0161006	0.00927019	0.0147666	0.0366565	0.00610364	0.0276573	0.00520195	0.0116388	0.005365	0.0248897	0.0033571	0.00582764	0.00275914	0.0421556	0.00479347	0.00287032	0.0145319	0.00199448	0.0371799	0.0173056	0.00432471	0.0151151
AGTAATTTGCAAGCGT-1	0.0576229	0.0084471	0.0146275	0.00864213	0.0236612	0.041654	0.109494	0.0871949	0.0408566	0.0492752	0.00897028	0.0511457	0.0103211	0.00835443	0.0168201	0.0294463	0.00487071	0.0410205	0.00641301	0.00230744	0.00691507	0.00631653	0.00409365	0.0284022	0.0117674	0.0271607	0.112313	0.00709626	0.00849329	0.0675276	0.0109765	0.0248331	0.0222718	0.0406885
AGTACAGAAGCTTATA-1	0.0119962	0.00578491	0.00949511	0.00363908	0.0133353	0.0808359	0.137615	0.106572	0.0867925	0.0569539	0.00724763	0.0263597	0.0280962	0.0124009	0.0499627	0.0186434	0.0189613	0.0513527	0.00847389	0.0374902	0.022684	0.0136722	0.00754347	0.0276937	0.00718393	0.0132307	0.0135719	0.0105601	0.0142775	0.00776547	0.030187	0.011669	0.00518907	0.0427637
AGTACATCATTTATCA-1	0.178594	0.0607574	0.207147	0.0281442	0.00583058	0.0402742	0.00431587	0.0226971	0.0142971	0.00172026	0.00197155	0.0141797	0.00480784	0.0044064	0.0154345	0.0926549	0.0118121	0.0510319	0.00430219	0.00530969	0.00391937	0.0115613	0.00321292	0.00154881	0.00447354	0.0926015	0.000336523	0.00210945	0.00905724	0.000349998	0.0790358	0.00820795	0.00274602	0.0111511
AGTACCTTCGAGTGCT-1	0.0188373	0.0179667	0.055123	0.00992267	0.022037	0.120149	0.148384	0.235435	0.0146304	0.0651347	0.00172061	0.00741815	0.00641615	0.00428692	0.0100822	0.0488288	0.00401554	0.0225698	0.00205871	0.0232207	0.00235949	0.00542948	0.0024768	0.00907981	0.00202178	0.0546388	0.00627165	0.00201542	0.0101631	0.00256931	0.03972	0.0122207	0.00298683	0.00980929
AGTACGGCCCGTATCG-1	0.0135557	0.00355271	0.0157726	0.00224183	0.144379	0.0721159	0.205756	0.14641	0.0247851	0.0519108	0.00407694	0.0133718	0.00773722	0.0143486	0.0175312	0.0309071	0.00310484	0.0495811	0.00343066	0.00629223	0.00231724	0.0158861	0.00307161	0.0119257	0.00302692	0.0220589	0.00605857	0.00354705	0.0127067	0.00226263	0.0469435	0.0149742	0.00573075	0.0186281
AGTACGGGCACCTGGC-1	0.00893603	0.0132372	0.0256832	0.0105287	0.0306099	0.104759	0.1629	0.175226	0.0256932	0.0720753	0.00285121	0.0180255	0.00895762	0.0290409	0.030272	0.0279056	0.00812994	0.0270036	0.00646805	0.0156825	0.00279045	0.0232712	0.00932128	0.0117641	0.00452187	0.0369731	0.0102431	0.0055054	0.0166949	0.00664592	0.0330745	0.013751	0.00477109	0.0166864
AGTACGTGGCCTGTCT-1	0.0412905	0.00118897	0.00225699	0.00236519	0.0125827	0.0104114	0.00203314	0.00675637	0.0728367	0.113679	0.0405662	0.0223858	0.00477242	0.0147662	0.0165912	0.00603979	0.00895009	0.0248092	0.0165479	0.0146841	0.00147093	0.01086	0.00496372	0.0274728	0.0248384	0.00612593	0.143181	0.0143467	0.0117298	0.116636	0.0778462	0.0459511	0.0594603	0.0196037
AGTACTCTTATGCCCA-1	0.00309561	0.0078412	0.026052	0.00866076	0.0134217	0.0440603	0.0111084	0.0293112	0.0468729	0.0147362	0.0202843	0.0127677	0.0335056	0.029953	0.0358182	0.00616235	0.0280098	0.0245895	0.0277725	0.0369148	0.00978155	0.0562527	0.0117199	0.0185316	0.0261114	0.0122669	0.0889984	0.0248975	0.0374688	0.0740833	0.0551953	0.0325244	0.0560042	0.0352263
AGTAGAAGGCGCCTCA-1	0.00280407	0.0112767	0.0304055	0.0120413	0.0158413	0.0696566	0.0150879	0.0430088	0.0347622	0.0142519	0.024538	0.00404074	0.0104317	0.0394859	0.0524603	0.00467688	0.02155	0.0386375	0.0184833	0.0265047	0.00481709	0.048466	0.00818551	0.0180832	0.0308494	0.0182387	0.0822031	0.0197474	0.0331887	0.0596007	0.0571078	0.0393309	0.0432552	0.0469808
AGTAGCGTGAACGAAC-1	0.0228555	0.00187628	0.00119345	0.00255098	0.0121299	0.00595101	0.0027743	0.00495371	0.0392758	0.0363241	0.0305465	0.0373357	0.00956888	0.00681172	0.0147473	0.0142164	0.00316884	0.0290648	0.0296162	0.0016521	0.00333489	0.0156267	0.00413255	0.0469094	0.0287674	0.0134557	0.251012	0.015891	0.0108996	0.155748	0.020958	0.0461486	0.0585012	0.0220012
AGTAGGAAGGAAGTTG-1	0.00378084	0.00146371	0.00333151	0.00221882	0.134405	0.0262228	0.068087	0.0075859	0.062042	0.0742438	0.0257256	0.052625	0.036855	0.005078	0.0809543	0.0275394	0.00598339	0.133588	0.0015163	0.0160551	0.0321381	0.00950492	0.0119907	0.0371798	0.00330415	0.00140844	0.00615887	0.00825425	0.0106843	0.00423454	0.036626	0.0116387	0.00483252	0.0527428
AGTAGGTAACATACAT-1	0.0187232	0.00660602	0.0215355	0.0103242	0.0100068	0.0533104	0.0218973	0.028253	0.0361577	0.0523187	0.00602221	0.0242075	0.0436228	0.0360521	0.17079	0.00285378	0.0177831	0.0213831	0.019412	0.0274341	0.0174038	0.0271752	0.010967	0.0209483	0.0261226	0.00985687	0.043044	0.0155417	0.0149626	0.0425913	0.0603813	0.0225576	0.0183004	0.0414539
AGTATAATACTAGGCA-1	0.00621004	0.00530837	0.00563212	0.00387855	0.0173956	0.0898124	0.222182	0.173338	0.0222805	0.0779665	0.00101503	0.0317576	0.0164173	0.00747622	0.0300469	0.0317141	0.00403262	0.0332863	0.00274706	0.0027096	0.00687286	0.00391992	0.00601359	0.0313127	0.00305912	0.0226633	0.0487654	0.00419317	0.0113333	0.0278179	0.00889617	0.0103566	0.00665504	0.0229337
AGTATACACAGCGACA-1	0.0158041	0.00736446	0.0195704	0.00619913	0.0129701	0.0607897	0.0888729	0.0960356	0.0256778	0.0380742	0.0101466	0.0173879	0.00928774	0.0131215	0.0186104	0.014259	0.0271678	0.0160467	0.00995082	0.0161197	0.00567745	0.0147758	0.00675709	0.0173253	0.0198885	0.0576574	0.0780588	0.0161304	0.0272742	0.0566277	0.0572011	0.0392073	0.0427025	0.03726
AGTATCCATAATAACG-1	0.0252598	0.00655834	0.0159023	0.0122233	0.0118801	0.036901	0.0632144	0.0427298	0.0152474	0.0857401	0.0143534	0.0199682	0.00883401	0.0147027	0.0185483	0.0220563	0.00885841	0.047666	0.00965218	0.0092412	0.00332288	0.0345975	0.00593992	0.0244059	0.0196854	0.051788	0.0885203	0.00953472	0.0196228	0.0528861	0.0677803	0.0600916	0.0380612	0.0342261
AGTATGCTGGAGACCA-1	0.0117299	0.0091784	0.00941605	0.00215679	0.0121754	0.13226	0.155617	0.199808	0.0826304	0.0287094	0.00191431	0.00891241	0.00703866	0.015106	0.0301137	0.00396725	0.013233	0.0213371	0.0185561	0.0130698	0.00297179	0.0238497	0.00686084	0.0145224	0.00531464	0.0178842	0.0102381	0.00847268	0.0370747	0.00849388	0.0434067	0.0147282	0.00592758	0.0233247
AGTATTTGGCACGACC-1	0.0434167	0.00636771	0.0171684	0.0022754	0.0160082	0.0828541	0.101699	0.102553	0.0774688	0.101867	0.00372307	0.0104642	0.00528453	0.0170681	0.0288898	0.0138858	0.0112099	0.0186069	0.0546364	0.022928	0.00581964	0.0244799	0.0118675	0.0115241	0.0082943	0.0216143	0.0143002	0.00882245	0.025318	0.0115076	0.0583065	0.0137171	0.0114846	0.0345692
AGTCAAATGATGTGAT-1	0.0122238	0.00265179	0.00607344	0.00323979	0.0133278	0.0565542	0.0617921	0.0439412	0.0330577	0.0442516	0.0147158	0.0368539	0.0402939	0.0187335	0.0608014	0.00407372	0.0108432	0.0585578	0.0317426	0.0131511	0.00753207	0.0158417	0.0071882	0.034052	0.0160977	0.0107036	0.100487	0.0166423	0.016153	0.0763657	0.0326708	0.0248495	0.0382159	0.0363206
AGTCAACACCACCATC-1	0.0231396	0.00828683	0.0124497	0.00248146	0.0203425	0.084975	0.189373	0.187241	0.0140238	0.0633995	0.00113727	0.0360926	0.0134231	0.00185902	0.0256906	0.0426697	0.00130555	0.0641121	0.00235079	0.00557507	0.00132098	0.00467147	0.00276093	0.021636	0.00408388	0.0321557	0.0551632	0.0026906	0.00750674	0.0255203	0.00673779	0.00857391	0.00975682	0.0174938
AGTCAAGATGACACTT-1	0.0199523	0.00634478	0.016701	0.00259283	0.0585601	0.106112	0.152121	0.169685	0.0293133	0.0621251	0.00213116	0.00840377	0.00748615	0.0104167	0.0214181	0.0208317	0.0174914	0.0208635	0.0116709	0.0219637	0.0180448	0.0335937	0.0070799	0.0100651	0.00501441	0.0319704	0.00594756	0.00646473	0.0194009	0.0041402	0.0559522	0.0121684	0.00666726	0.0173067
AGTCACTAGCTCTCGA-1	0.0193315	0.0100323	0.0380941	0.00710807	0.0100095	0.0653181	0.0582271	0.0812205	0.0446195	0.017029	0.00988949	0.047155	0.00746086	0.0107173	0.0314716	0.0443396	0.0110222	0.0368706	0.0167377	0.00422454	0.00194332	0.022838	0.00908362	0.0224084	0.0190563	0.034633	0.0843821	0.0116116	0.0362487	0.0532424	0.0310454	0.0268544	0.0282675	0.0475066
AGTCACTCCGCCTCAT-1	0.00754424	0.00584643	0.00217304	0.00531617	0.0133654	0.00828435	0.0021214	0.00515072	0.0153602	0.0148315	0.0420046	0.0109301	0.00103206	0.0039555	0.00985193	0.00336127	0.00516542	0.00926281	0.0220627	0.00279029	0.00144306	0.011462	0.00332595	0.0400893	0.0348434	0.0149762	0.280734	0.0186072	0.0103398	0.203146	0.0203509	0.0499603	0.0929345	0.0273766
AGTCAGCCACCGCCTG-1	0.0221538	0.0058261	0.00750043	0.00555494	0.0120747	0.0245265	0.00724908	0.01701	0.0264616	0.0414019	0.0235641	0.0143827	0.00596523	0.0211995	0.012722	0.00549298	0.00924699	0.0146481	0.0320051	0.0105435	0.00296504	0.0154536	0.00399445	0.0321948	0.0311682	0.0243055	0.208938	0.015717	0.0129092	0.135663	0.0510646	0.0510049	0.0605846	0.0345074
AGTCCAGCGGGTACGT-1	0.0164177	0.00710717	0.0134498	0.00574434	0.0221002	0.0858687	0.1772	0.185849	0.0116072	0.104587	0.00365555	0.0221927	0.0119858	0.00807636	0.00546821	0.0229537	0.00295709	0.0160495	0.0034929	0.00124295	0.00170279	0.00348635	0.00244778	0.0263543	0.00479511	0.0469175	0.0483604	0.00456182	0.0129557	0.0252581	0.0567619	0.0146539	0.0073089	0.0164295
AGTCCATTGGCTGATG-1	0.0291208	0.00646636	0.0417389	0.00488394	0.0346857	0.0765848	0.0327946	0.057865	0.0601199	0.0553077	0.0233647	0.0165044	0.01788	0.0214605	0.0386655	0.00456341	0.015835	0.0228683	0.0223955	0.0281409	0.0191678	0.035751	0.00846729	0.00901255	0.0185316	0.0108525	0.0487644	0.0133035	0.0257881	0.0379471	0.0888586	0.0219831	0.0266027	0.0237238
AGTCCCGCCTTTAATT-1	0.00500447	0.000344936	0.00151975	0.00111164	0.303428	0.00762018	0.00412736	0.00358795	0.0285644	0.0193538	0.0429228	0.0412805	0.0421321	0.0299211	0.0204661	0.0157411	0.0136746	0.0356274	0.0111838	0.00640855	0.0161448	0.055074	0.0116745	0.0127986	0.0120903	0.0014103	0.0162867	0.0116385	0.0228907	0.0103342	0.104656	0.028849	0.0220033	0.0401292
AGTCGACGGTCTCAAG-1	0.0203691	0.0103337	0.0309955	0.00583543	0.0150136	0.0494671	0.0216194	0.0267085	0.030015	0.0216346	0.0221963	0.0234467	0.0302554	0.0253615	0.101553	0.00663541	0.0116584	0.0542488	0.0224177	0.0189152	0.00761958	0.0398273	0.0112541	0.0350371	0.024321	0.0172874	0.0807456	0.0124483	0.0168863	0.0455095	0.0394296	0.0380207	0.028627	0.0543064
AGTCGGCCCAAACGAC-1	0.00893037	0.0109274	0.0306223	0.00468485	0.0386676	0.120983	0.152382	0.242393	0.0162705	0.0541075	0.00237512	0.00800825	0.0150681	0.0108114	0.0120098	0.0462297	0.00746078	0.0210151	0.00154293	0.0164982	0.00161554	0.0308198	0.0032077	0.00681921	0.00255689	0.0467495	0.00679357	0.00271931	0.010527	0.00241571	0.0399872	0.010224	0.0043431	0.0102337
AGTCGGCTCAACTTTA-1	0.0116534	0.00249909	0.0149838	0.00107498	0.0113632	0.107147	0.0180142	0.0766543	0.216881	0.0169534	0.00399326	0.00436497	0.0112785	0.0351302	0.0497323	0.000410033	0.043378	0.0237166	0.0232174	0.0484124	0.0107608	0.0495141	0.00963367	0.0015072	0.0190539	0.00927558	0.000800896	0.0142262	0.0329326	0.00282866	0.0711247	0.0124016	0.0169359	0.0281466
AGTCGGTTGCGTGAGA-1	0.0164263	0.00660107	0.0184384	0.00458501	0.0181677	0.107158	0.0657552	0.106277	0.0935707	0.04707	0.00794093	0.00438551	0.00510519	0.024825	0.0279678	0.00187102	0.0278967	0.0285196	0.0258057	0.0331091	0.0102324	0.0577708	0.0158939	0.0101565	0.0161812	0.0114035	0.0210014	0.0115902	0.0267953	0.0173292	0.0688394	0.0128144	0.0154468	0.0330694
AGTCGTATAAAGCAGA-1	0.0100556	0.00806541	0.0195953	0.012796	0.0105178	0.0693892	0.134398	0.101604	0.0333531	0.0563213	0.0100831	0.0462087	0.0386363	0.00435958	0.0573816	0.02984	0.0124466	0.0375403	0.00326602	0.0453917	0.00688424	0.0260748	0.0122999	0.0198074	0.00709409	0.0250262	0.00943019	0.0113803	0.0205317	0.00677142	0.0437672	0.0329657	0.00712596	0.0295913
AGTCGTCGACCACCAA-1	0.00609885	0.0093182	0.0264409	0.0086737	0.0199091	0.0875896	0.0812523	0.107131	0.0352408	0.0252845	0.0130891	0.0112893	0.0192968	0.0185767	0.0430314	0.0311979	0.0303559	0.0526381	0.0159562	0.0360846	0.0335213	0.0494372	0.0118552	0.025085	0.0119326	0.0176348	0.0133968	0.0146865	0.0309324	0.00777127	0.0457301	0.0113292	0.0140794	0.0341534
AGTCGTGGGCATTACG-1	0.000853484	0.00504676	0.0159878	0.00104431	0.063323	0.127731	0.0766961	0.154142	0.148743	0.0179375	0.00291745	0.00136382	0.0138833	0.0218577	0.0505196	0.000816662	0.021244	0.0113474	0.0106926	0.0486117	0.00385149	0.0339219	0.00495058	0.00211325	0.0124246	0.0113283	0.00199828	0.011117	0.0284377	0.0030297	0.0659562	0.0054551	0.006841	0.013815
AGTCTAAAGTATACTC-1	0.179343	0.0551667	0.123787	0.0346802	0.0140333	0.0665994	0.0582023	0.0688462	0.0137706	0.0124013	0.000996561	0.0187715	0.00212553	0.0040219	0.00815234	0.0558568	0.00733018	0.0487699	0.00370079	0.00340239	0.0034826	0.018769	0.00616579	0.00410118	0.00352474	0.062749	0.00192933	0.00245635	0.0153753	0.000958497	0.0652403	0.00913868	0.00238611	0.0237651
AGTCTCACAAGACTAC-1	0.00198596	0.02936	0.0151843	0.00233261	0.00940216	0.117637	0.0218213	0.118692	0.101395	0.00784494	0.00247969	0.00268595	0.00689988	0.0141717	0.0627683	0.00127748	0.023884	0.0201308	0.0864568	0.029503	0.0107713	0.0226627	0.0113751	0.00918384	0.0166438	0.0192816	0.0329834	0.0223628	0.0436669	0.0272897	0.0401324	0.0209019	0.0183936	0.0284373
AGTCTGGACATCCTTG-1	0.0255038	0.00571193	0.0169902	0.0050912	0.022879	0.0934033	0.213254	0.159463	0.01472	0.058869	0.00325326	0.027374	0.00649511	0.00897568	0.0150152	0.0210014	0.0172728	0.0552455	0.0181751	0.00710118	0.00216874	0.0144543	0.00738341	0.0196899	0.0040967	0.0363338	0.0166312	0.00529382	0.0191408	0.00780943	0.0306234	0.0119382	0.00698129	0.0216601
AGTCTTCTCCTCAAAT-1	0.0201321	0.00479495	0.0100815	0.00563056	0.0216324	0.0297796	0.00434513	0.0238263	0.0742395	0.0246394	0.0204006	0.0154626	0.00525273	0.00879257	0.0208295	0.0123549	0.00661707	0.0282348	0.0281126	0.00914524	0.00603702	0.0497923	0.00606198	0.0292004	0.0261538	0.0119806	0.187538	0.0136207	0.0168315	0.12242	0.0378582	0.0317	0.0547223	0.0317799
AGTCTTTAAAGTGTCC-1	0.00311424	0.0111993	0.0173424	0.00857782	0.013909	0.0952708	0.16686	0.147771	0.0324541	0.0558936	0.00592457	0.00915407	0.0174826	0.00559122	0.0298458	0.0285675	0.00916778	0.0544788	0.00670877	0.00885636	0.00414255	0.0251193	0.0105486	0.0152523	0.00600767	0.0324619	0.0134171	0.00734303	0.0222571	0.00681563	0.0357964	0.0401183	0.0136288	0.0389216
AGTGAACAAACTTCTC-1	0.0327125	0.00739555	0.0277045	0.00284871	0.0263165	0.0512565	0.0217554	0.0350698	0.0814751	0.102903	0.00975082	0.0231304	0.0165904	0.025188	0.0376924	0.0152579	0.0264495	0.0335474	0.0277355	0.0354974	0.014615	0.0295389	0.00995008	0.0191353	0.015603	0.00873702	0.0582611	0.0132195	0.0140062	0.0378206	0.0737574	0.017123	0.0225522	0.0254035
AGTGACCTACTTTACG-1	0.0255326	0.00446252	0.0129088	0.00294698	0.0161392	0.0768366	0.140004	0.119673	0.0279977	0.0791937	0.00328573	0.0359286	0.0324384	0.0330977	0.0520671	0.0246395	0.015058	0.0464242	0.00976106	0.0279249	0.0158016	0.0115746	0.00992167	0.0219985	0.00446838	0.0145114	0.00870902	0.00791889	0.0244195	0.00519981	0.0502353	0.0102872	0.00513815	0.0234959
AGTGACTGTGACACAA-1	0.00616026	0.00275418	0.0014566	0.00364556	0.0333672	0.00599761	0.00297637	0.00455113	0.0126091	0.0157196	0.0218032	0.0196225	0.000560677	0.0113808	0.0150347	0.00451623	0.00196776	0.0183138	0.0307206	0.00178155	0.00100361	0.00885533	0.00272347	0.0379664	0.036219	0.0136749	0.296851	0.0194376	0.0151581	0.193304	0.0197509	0.0428258	0.0790916	0.0181987
AGTGAGACTTCCAGTA-1	0.0350903	0.0105144	0.0277111	0.00829524	0.0160392	0.0247098	0.00412991	0.0183606	0.0193522	0.0206945	0.0162291	0.0120132	0.00255816	0.0134557	0.0339965	0.0232001	0.0230975	0.0198322	0.0132171	0.0128917	0.00454541	0.0297734	0.00586097	0.0270971	0.0312358	0.0254154	0.126951	0.0163643	0.0239565	0.0936338	0.0882052	0.0693816	0.0748734	0.0273175
AGTGAGCCTCGCCGCC-1	0.0416578	0.00763394	0.0245775	0.00858765	0.0277931	0.0484377	0.0851217	0.0720231	0.020555	0.0653645	0.00652227	0.0243552	0.00517249	0.0133941	0.0151633	0.0282905	0.00889598	0.0376378	0.0108387	0.0106749	0.00553317	0.0222726	0.00496599	0.0231924	0.0162682	0.0375031	0.0768408	0.00814236	0.0136463	0.0462156	0.0764742	0.0571938	0.0321424	0.0169118
AGTGAGGGTTTCTGAC-1	0.099047	0.000209051	0.000607501	0.000220029	0.00465103	0.00658516	0.00166206	0.00392034	0.0850117	0.296429	0.00153987	0.0612582	0.0171028	0.0238284	0.0162817	0.00265229	0.00571425	0.0203551	0.0283644	0.011506	0.00372625	0.00664982	0.00528649	0.0185181	0.00712199	0.00101927	0.0384446	0.00844363	0.00377284	0.0493477	0.121648	0.00962433	0.00711451	0.0323369
AGTGATAACCTGCGCG-1	0.00425722	0.00439733	0.0117354	0.0179466	0.0208152	0.0811426	0.181422	0.12993	0.0231677	0.0605953	0.00829712	0.025197	0.0225058	0.0110401	0.0357146	0.0385037	0.0151438	0.0569164	0.0027088	0.0132111	0.00903204	0.022701	0.0149965	0.0247023	0.004406	0.0222731	0.0198911	0.00707886	0.017259	0.0102069	0.0275838	0.0119984	0.00744496	0.0357783
AGTGATATGAGTAGTT-1	0.0404865	0.0157085	0.12893	0.0185792	0.0112087	0.0831149	0.110179	0.136892	0.0160359	0.048595	0.00105905	0.0153966	0.00804957	0.0104617	0.0103874	0.0689097	0.00384056	0.056316	0.00259024	0.00312288	0.00269106	0.0101417	0.0023478	0.00667283	0.00229169	0.0795468	0.00444337	0.00214761	0.0111586	0.001565	0.0521092	0.0201065	0.00235257	0.0125614
AGTGATTCAAGCAGGA-1	0.0358374	0.00673384	0.0172522	0.00497574	0.0171687	0.0346273	0.0132916	0.0237279	0.026392	0.0187627	0.0101947	0.0116938	0.00824565	0.0215011	0.0158228	0.0108484	0.0116799	0.0228057	0.0147721	0.0182903	0.00372698	0.0191314	0.00429511	0.0242245	0.0263509	0.0212025	0.179027	0.0153841	0.0166714	0.120964	0.105035	0.0399874	0.0525065	0.026869
AGTGCACGCTTAAGAA-1	0.00593095	0.00397477	0.00928317	0.00387476	0.0175542	0.102014	0.0149255	0.0548343	0.06148	0.0167344	0.0202645	0.00851146	0.030615	0.0270273	0.0682055	0.00591132	0.0289781	0.0339808	0.033876	0.0207913	0.00580327	0.0442516	0.0099786	0.0121796	0.0206652	0.00953612	0.0855219	0.0178117	0.0204111	0.0631245	0.0487678	0.018343	0.027342	0.0474962
AGTGCGTAGCTCGTAA-1	0.0230464	0.0028524	0.00768768	0.0117097	0.0091227	0.072909	0.0778261	0.0865826	0.0572081	0.045268	0.00334884	0.0194927	0.0157362	0.0189484	0.0585666	0.00331179	0.0113069	0.034094	0.0119498	0.0111573	0.00946424	0.0283907	0.00615787	0.0144788	0.0146392	0.023509	0.0894248	0.0123378	0.0276753	0.0562015	0.0487774	0.0285644	0.0235845	0.034669
AGTGCTAAACACAGCA-1	0.0158321	0.0143139	0.0186561	0.00772766	0.0152574	0.0932614	0.177337	0.167417	0.0237505	0.0504395	0.00441598	0.0251435	0.0142773	0.00377479	0.0313094	0.0737042	0.00526277	0.0343201	0.00570868	0.00500945	0.00428802	0.00951737	0.00498967	0.022905	0.0038619	0.0515403	0.0221064	0.00359445	0.0108053	0.00838409	0.0242715	0.0109802	0.00455139	0.031285
AGTGCTTGCACGAATA-1	0.249104	0.112602	0.158202	0.0572729	0.000798324	0.00754054	0.000605875	0.0042657	0.0279322	0.000453637	0.00268936	0.00857782	0.000437025	0.00473261	0.0197508	0.101702	0.0102873	0.06076	0.000613842	0.00759103	0.00441156	0.0131508	0.0020849	0.00044797	0.0011545	0.0645851	5.02947e-05	0.000651362	0.00491708	5.538e-05	0.0557215	0.00314336	0.000843992	0.0128632
AGTGGCCCGCAAATGG-1	0.0853772	0.0211619	0.0262276	0.00800212	0.0101472	0.0245694	0.0319773	0.0204547	0.0785107	0.0620359	0.0090911	0.0628808	0.00639848	0.00868776	0.0609172	0.0421866	0.00369059	0.0628537	0.00527577	0.00327349	0.00600424	0.0131451	0.00641392	0.0265892	0.00901405	0.0234781	0.100658	0.00717643	0.00967171	0.064085	0.0191989	0.014863	0.0197543	0.0462284
AGTGGCGGCAATTTGA-1	0.0206317	0.00545999	0.00969376	0.0102441	0.0229647	0.0138069	0.00434936	0.0119416	0.0183498	0.0369007	0.0146958	0.0191955	0.00472837	0.00820007	0.029663	0.0213532	0.00591205	0.00962717	0.0109213	0.0129282	0.00382138	0.0187286	0.00349416	0.0318284	0.0295167	0.0123506	0.199748	0.0161108	0.0157419	0.151742	0.0746088	0.0460608	0.0820079	0.0226722
AGTGGCGTCTGAAGGT-1	0.135072	0.0485825	0.201567	0.0394883	0.00500796	0.0268791	0.0050606	0.0212293	0.0327364	0.00813057	0.00766619	0.0299232	0.00280548	0.00502495	0.00982598	0.119662	0.00930056	0.0620224	0.0134367	0.0037423	0.00173981	0.0145186	0.00471547	0.00652202	0.00519426	0.0705208	0.0164749	0.00351877	0.00865181	0.0121991	0.0330355	0.0137905	0.00750881	0.0144455
AGTGGCTCCGTCGGCC-1	0.016154	0.00522315	0.00834517	0.00271218	0.0233714	0.0724577	0.254683	0.149099	0.0192239	0.118265	0.00123766	0.0403445	0.016143	0.00300022	0.0319237	0.0485685	0.00186425	0.0389504	0.0019302	0.00261314	0.00606725	0.00620724	0.00557676	0.0288383	0.0012554	0.0228471	0.0146699	0.00296018	0.00714059	0.00504029	0.0126767	0.00566875	0.00264627	0.0222956
AGTGGTGTTACCCGTG-1	0.0187686	0.0140215	0.0137119	0.0034885	0.0139151	0.0792641	0.0954814	0.0960998	0.037692	0.0579858	0.0118481	0.0304689	0.0408982	0.0177828	0.0546486	0.00774071	0.0115478	0.0564192	0.0227858	0.0121891	0.0184858	0.0308156	0.00666457	0.0266157	0.00837955	0.0138344	0.0504635	0.0101842	0.0137152	0.0363798	0.0297535	0.0135263	0.0160145	0.0284099
AGTGTATTGCGCATTG-1	0.0054503	0.000703499	0.00259515	0.00316251	0.226254	0.0158728	0.0283016	0.00495216	0.0321173	0.0461235	0.0244533	0.0664689	0.045705	0.00924974	0.0717639	0.0219494	0.0101716	0.102992	0.00493641	0.0158378	0.0372019	0.031157	0.0105342	0.0216682	0.00583308	0.000890226	0.00408208	0.00942811	0.0141435	0.00377875	0.0603552	0.0182359	0.00615842	0.0374728
AGTGTGGTCTATTGTG-1	0.0155434	0.0248497	0.0150706	0.0017576	0.0110766	0.0854426	0.0521761	0.0980968	0.0756697	0.056	0.00632107	0.00661499	0.00367905	0.0160379	0.0178593	0.00585641	0.019403	0.0225147	0.0136585	0.00782329	0.00608205	0.0369692	0.00445146	0.0127785	0.0171308	0.0158787	0.0729102	0.00998635	0.0166545	0.0563238	0.0955334	0.0298556	0.0303326	0.0396615
AGTTAAACACTTGCGA-1	0.196248	0.0577577	0.161915	0.0321409	0.00271773	0.0334528	0.00592954	0.0192673	0.0267334	0.0019769	0.000683338	0.059864	0.00185298	0.00195261	0.0139302	0.1485	0.0125504	0.099713	0.00156304	0.00109272	0.000985688	0.00880883	0.00428342	0.00293687	0.00241739	0.062546	0.000606228	0.00127313	0.00771094	0.00042635	0.0163048	0.00355029	0.00102478	0.00728306
AGTTAAGCGGTCCCGG-1	0.0176654	0.000809165	0.000422377	0.00243969	0.0957557	0.00306575	0.0004488	0.00187068	0.016829	0.0100263	0.0309245	0.0102071	0.000534374	0.00968833	0.00755316	0.00337615	0.00218498	0.0131785	0.011055	0.00748097	0.00270229	0.0126861	0.00345633	0.0402519	0.0317049	0.00860811	0.248595	0.0172762	0.0101171	0.181092	0.0695737	0.0446824	0.0658115	0.0179274
AGTTAAGTCAACCGCT-1	0.00242096	0.017224	0.0190477	0.00560756	0.0151743	0.10664	0.0307215	0.0917336	0.143306	0.0141786	0.010879	0.00376535	0.0124274	0.0326756	0.0895476	0.000804869	0.0245424	0.0215338	0.0225524	0.0146643	0.0140576	0.0328876	0.0112329	0.0102061	0.0181416	0.00612009	0.0289918	0.0144052	0.036065	0.0363324	0.040095	0.0165898	0.0236482	0.0317793
AGTTACCGCACATGGT-1	0.0756745	0.00044215	0.000853472	0.000234442	0.00892619	0.0368239	0.00747059	0.021763	0.08419	0.243207	0.00236891	0.0342386	0.00545136	0.019946	0.0167036	0.00236788	0.0142353	0.00936059	0.0462136	0.0128016	0.00731394	0.01091	0.00453289	0.0161045	0.0124756	0.0042724	0.0714485	0.00811424	0.00483005	0.0539697	0.104926	0.0124014	0.0150124	0.0304158
AGTTACTCTATCGTGG-1	0.00614776	0.0002354	0.000836944	0.000399607	0.371698	0.00376507	0.000308659	0.00210446	0.0230518	0.0057856	0.0164235	0.00375683	0.00324223	0.0121589	0.0166245	0.0124915	0.00477085	0.0169885	0.0202836	0.00819544	0.00695119	0.0426595	0.00544659	0.00821751	0.0306432	0.00202482	0.0523165	0.0147789	0.0310778	0.0282317	0.166643	0.0367712	0.0200741	0.0248956
AGTTATTGAAAGGTAA-1	0.0320196	0.00309837	0.00399796	0.00416529	0.0107728	0.00897604	0.00288818	0.00535535	0.0305615	0.0446322	0.029827	0.028052	0.00391228	0.0147479	0.0141299	0.0104031	0.00673721	0.0243783	0.0122396	0.00388122	0.0035337	0.0083136	0.00355748	0.0427024	0.0305659	0.0134346	0.228369	0.0180754	0.0104531	0.163962	0.0387716	0.0596487	0.0617762	0.0220604
AGTTCCTACAGAATTA-1	0.00105353	0.0077082	0.0339022	0.00512558	0.0183486	0.115218	0.168334	0.137037	0.0278371	0.0318499	0.00404469	0.00268116	0.00905354	0.00510545	0.0477996	0.0423752	0.0252259	0.0242546	0.00466978	0.028121	0.019835	0.0589443	0.0106194	0.00637081	0.00498066	0.0190655	0.00289352	0.00946828	0.0297701	0.0024637	0.0307543	0.0114496	0.00742095	0.0462193
AGTTCCTATTTATGTT-1	0.221963	0.0571963	0.2001	0.0311661	0.00090776	0.0122992	0.00101451	0.00650157	0.0282798	0.00193643	0.00386053	0.0245582	0.00144728	0.00301672	0.0166389	0.106165	0.0041665	0.092961	0.00367455	0.00663994	0.00203669	0.0296084	0.00228477	0.000622951	0.00169472	0.056299	0.000120224	0.00120233	0.00914366	0.000137025	0.0565159	0.00384938	0.000937004	0.0110545
AGTTCTGCGTTGTATC-1	0.0247514	0.004041	0.0103819	0.00253697	0.014337	0.0660602	0.121848	0.0696376	0.0548102	0.0848964	0.00433593	0.0451996	0.0476465	0.0187579	0.0363915	0.0267812	0.00764498	0.0634596	0.00778295	0.0122695	0.0153779	0.00774379	0.0120142	0.0292223	0.00681028	0.0248968	0.0310936	0.00882524	0.00978575	0.0193326	0.0407455	0.0162205	0.0133571	0.0410039
AGTTGACATCGGCTGG-1	0.0207426	0.00295314	0.00290572	0.00243618	0.0131213	0.0119659	0.00452065	0.00902993	0.0344118	0.028752	0.0200129	0.0306962	0.00119	0.00750853	0.0174489	0.00564266	0.00346292	0.0186033	0.0315228	0.00768863	0.00119643	0.00906544	0.00331376	0.0416063	0.0314404	0.0176546	0.253403	0.0161941	0.0114527	0.170444	0.0433639	0.0380399	0.066261	0.0219487
AGTTGACGGTCCTTGC-1	0.00189008	0.0077307	0.0228682	0.00608015	0.0153434	0.0845371	0.0378322	0.0626768	0.074229	0.0227723	0.0134194	0.0184105	0.0397396	0.0710372	0.0671037	0.0146915	0.0208628	0.0436252	0.0124798	0.0179043	0.00965563	0.0516621	0.0101038	0.00943267	0.0185487	0.00823659	0.0217958	0.0161652	0.0606588	0.0171895	0.0435392	0.0271551	0.0258947	0.0247285
AGTTGCGGTCCTCAAC-1	0.0346445	0.00245119	0.00377389	0.00207855	0.0127758	0.0502789	0.104358	0.0895192	0.0412381	0.064492	0.008006	0.0600623	0.0151625	0.00908862	0.0225258	0.0271066	0.00189073	0.0411825	0.00967537	0.00204067	0.00538796	0.00249691	0.00327695	0.0428833	0.0126046	0.015468	0.13684	0.00779821	0.00667637	0.0719354	0.0139325	0.0191348	0.0280143	0.0311989
AGTTGCTGACTGATAT-1	0.185703	0.0700766	0.144825	0.0569182	0.000614442	0.00650257	0.00055774	0.0034004	0.0218748	0.000416404	0.0060674	0.0332382	0.000621305	0.00151522	0.00380648	0.183047	0.00418482	0.112947	0.00322282	0.00118919	0.000811728	0.0351654	0.002793	0.00126316	0.00125127	0.0720227	0.000116637	0.000572323	0.00865206	9.15195e-05	0.0226768	0.00333828	0.000561264	0.00995611
AGTTTCGCAGGTCGGA-1	0.0191233	0.0108379	0.0484753	0.0105453	0.0343443	0.0236393	0.0158502	0.0223507	0.029431	0.0227876	0.0256616	0.0174571	0.00649279	0.0113594	0.0140117	0.021145	0.0072355	0.0259354	0.0147847	0.00791472	0.00312264	0.0235775	0.00687562	0.0317392	0.024518	0.0480582	0.134945	0.0154407	0.0281637	0.0791009	0.102397	0.0458791	0.0508763	0.0159237
AGTTTGCACCTGCCTC-1	0.0141863	0.00346166	0.0164606	0.00515093	0.0187426	0.0730377	0.0255267	0.048566	0.0491503	0.0556143	0.011949	0.00912938	0.00975712	0.0130127	0.0630911	0.00971405	0.0121182	0.0236821	0.0126889	0.0263032	0.0208301	0.0304435	0.0127166	0.0176263	0.0205612	0.00971981	0.088417	0.0180308	0.0238713	0.0659888	0.0997053	0.0224221	0.0367369	0.0315876
AGTTTGGCACGGGTTG-1	0.0150666	0.00551117	0.0172507	0.00277388	0.0173921	0.0518225	0.0115394	0.0435215	0.152467	0.0482384	0.00901264	0.0123887	0.0117729	0.0120836	0.0351012	0.00158351	0.0170064	0.0129423	0.0275278	0.0167227	0.0117196	0.0577425	0.0163567	0.0153981	0.0189814	0.00749703	0.093866	0.0185994	0.0307459	0.0785914	0.0433863	0.0196534	0.0313442	0.0343936
AGTTTGGCCAGACCTA-1	0.00372648	0.00552225	0.0080564	0.00578374	0.0123493	0.0252331	0.0039043	0.0161515	0.0309774	0.0126525	0.0245863	0.0115215	0.00220497	0.0236616	0.0230658	0.00409877	0.00951874	0.0173773	0.0381367	0.00572018	0.0015569	0.0277668	0.00975565	0.0340185	0.0441665	0.0145192	0.188551	0.0295098	0.0489172	0.131883	0.0457275	0.0425929	0.0604292	0.0363567
ATAAACCATTGGACGG-1	0.00823683	0.00703266	0.00254806	0.0102817	0.0087244	0.0160608	0.00284048	0.00899266	0.0126815	0.01546	0.0238371	0.0183608	0.00169974	0.00584055	0.00953838	0.00576236	0.00397805	0.0287726	0.0193455	0.00257007	0.00156286	0.0104372	0.00362595	0.0397875	0.0322261	0.0151927	0.302802	0.0152529	0.012051	0.178936	0.0197256	0.0372626	0.0909364	0.0276375
ATAAACGGACCCGTAA-1	0.00709467	0.00962494	0.0261141	0.0114877	0.0101607	0.0721791	0.0378619	0.0528322	0.0635148	0.028189	0.0133168	0.0486884	0.0622681	0.0326576	0.0695091	0.00486645	0.0208901	0.0542345	0.0137557	0.0378502	0.019356	0.0284149	0.0155409	0.0179935	0.0141997	0.0100813	0.0181867	0.0119856	0.0272491	0.0132475	0.0753895	0.0365305	0.0140456	0.0206831
ATAAAGGCTCGGTCGT-1	0.0199375	0.00342319	0.00559714	0.00247048	0.0162294	0.0680419	0.212672	0.131352	0.0510289	0.0575338	0.00215183	0.0341132	0.013239	0.00405413	0.0289671	0.0193172	0.00228257	0.0453765	0.0046493	0.00788693	0.00619065	0.00358292	0.00409508	0.0211783	0.00541976	0.0268107	0.070871	0.00628062	0.0143657	0.0374663	0.0134435	0.010932	0.0106435	0.0383957
ATAAAGGTCAAGTACG-1	0.0325934	0.00892248	0.0357098	0.00443091	0.0163052	0.0496621	0.0172918	0.0369641	0.0695915	0.118304	0.00721894	0.0124332	0.0131307	0.0147997	0.0338063	0.0203086	0.0126792	0.0312603	0.0138225	0.021185	0.0116587	0.0309116	0.00560155	0.0111252	0.0141436	0.023496	0.0511998	0.0104198	0.0148627	0.0439575	0.120761	0.042522	0.0257916	0.0231296
ATAAATATTAGCAGCT-1	0.0105037	0.00268856	0.00421107	0.000844756	0.0143933	0.0817546	0.232555	0.16793	0.0292399	0.0907594	0.000690659	0.0839098	0.00758774	0.00698062	0.02924	0.0210907	0.00252326	0.0356577	0.00233056	0.00143329	0.00241081	0.00341934	0.00658857	0.0219896	0.00248629	0.0300651	0.0384372	0.00333566	0.00911176	0.014201	0.00589	0.00887975	0.00379001	0.0230704
ATAACGCCGGAGGGTC-1	0.0291745	0.0149813	0.0404502	0.00720065	0.0202582	0.0934847	0.100692	0.136719	0.0503172	0.0489806	0.00268629	0.0067975	0.0136804	0.0165766	0.0309725	0.0139992	0.0178848	0.0243338	0.00942033	0.0596525	0.0305159	0.0242868	0.0059369	0.00438865	0.00629323	0.0231668	0.00281705	0.00543046	0.0149295	0.00209589	0.0809124	0.0185038	0.00519025	0.0372692
ATAACGGAGTCCAACG-1	0.0181334	0.00699089	0.0290852	0.0050461	0.0502068	0.0799074	0.0433798	0.0779642	0.107934	0.0600934	0.00881282	0.00979805	0.0159936	0.021749	0.0391409	0.00630463	0.0190737	0.0245855	0.0388098	0.0230552	0.00904026	0.0251093	0.00901768	0.01112	0.014875	0.00682902	0.0505038	0.0104619	0.0187128	0.0364307	0.0586929	0.0123808	0.0171692	0.0335923
ATAACGTTACCTCCAC-1	0.00966954	0.0335388	0.0441838	0.00978495	0.0373842	0.119724	0.171881	0.257946	0.00926263	0.0503708	0.000610398	0.00608418	0.00467445	0.00352815	0.00618907	0.0280025	0.0117676	0.0234778	0.00159027	0.013454	0.00197301	0.0180667	0.00255852	0.00806099	0.00178012	0.0560066	0.00494073	0.00219659	0.0114619	0.00177015	0.0281665	0.01164	0.00310982	0.0051444
ATAAGGTGGAGAACAT-1	0.00418906	0.00785558	0.0181641	0.00147621	0.00943956	0.121475	0.0143344	0.072718	0.276487	0.0109815	0.00220157	0.000365678	0.00603193	0.0104443	0.0441198	0.000875152	0.0426851	0.0055203	0.0373934	0.0403051	0.0305087	0.0506492	0.00838348	0.000801375	0.0145604	0.00773493	0.000426181	0.0129478	0.0250965	0.00207881	0.0625619	0.01036	0.0108526	0.0359754
ATAAGTACCCGATTGT-1	0.0104458	0.026052	0.0972056	0.0118219	0.0365342	0.126531	0.115799	0.226817	0.0132611	0.0309419	0.00348462	0.00535995	0.00273263	0.00633064	0.0101852	0.0434115	0.0108659	0.0260493	0.00409956	0.0125132	0.00197091	0.023719	0.00243737	0.00358202	0.00316847	0.0370339	0.00228885	0.00229871	0.0162434	0.00123821	0.056618	0.0140724	0.00450653	0.0103798
ATAAGTAGGATTCAGA-1	0.0382829	0.00284346	0.00907157	0.0026128	0.0195256	0.0532606	0.117526	0.0737144	0.0173201	0.102022	0.0130875	0.0252468	0.0261258	0.0111993	0.0211472	0.0490384	0.0125455	0.0458629	0.00421208	0.00747908	0.00838662	0.0116596	0.0109887	0.0272241	0.00952792	0.0189088	0.0327854	0.00997217	0.00857175	0.0209137	0.120063	0.0307495	0.0200683	0.0180567
ATAAGTAGGGCGACTC-1	0.0130348	0.00730314	0.0223574	0.00648042	0.0172282	0.0206218	0.00568101	0.0167987	0.0217804	0.0152305	0.0163779	0.0124791	0.00350337	0.0148192	0.018198	0.00364044	0.00694198	0.0177371	0.0109543	0.0144812	0.00278512	0.0319743	0.00516131	0.0329888	0.0287644	0.0157849	0.208974	0.0217142	0.0245539	0.159355	0.0406687	0.0680207	0.0705196	0.0230864
ATAAGTTACCGCGACG-1	0.00881135	0.00548302	0.0223566	0.00755533	0.03475	0.0573484	0.0841929	0.0745512	0.0320257	0.0341767	0.0164188	0.006711	0.0180238	0.0357719	0.0214437	0.0176906	0.0321878	0.0254581	0.0158974	0.0160878	0.00904091	0.0322433	0.0108164	0.0145666	0.0236584	0.056579	0.0489109	0.0153236	0.028516	0.034571	0.0637847	0.0236859	0.027711	0.0436501
ATAATACCGTTAGCCG-1	0.201151	0.0376969	0.106857	0.0325814	0.00598581	0.0295124	0.0128721	0.026376	0.0424543	0.00818586	0.00162048	0.0380913	0.00673841	0.00569346	0.0200364	0.116555	0.0052742	0.0771569	0.00534022	0.00164106	0.00452128	0.0169049	0.00501316	0.00957275	0.00656957	0.0459741	0.0334504	0.00347063	0.0102097	0.0231655	0.0292331	0.00697134	0.00940942	0.0137127
ATAATAGCTGTTGAAT-1	0.00878151	0.00988927	0.0308837	0.00873293	0.0221355	0.102876	0.0264884	0.0727289	0.0834558	0.0253005	0.00962412	0.00433617	0.0268558	0.029527	0.0536462	0.0099285	0.0283916	0.0544641	0.0274486	0.0417199	0.0196092	0.0681163	0.0102904	0.00441174	0.0152143	0.00993096	0.00232215	0.0162635	0.0334399	0.00421698	0.069313	0.0144948	0.0146359	0.0405266
ATAATAGTGTAGGGAC-1	0.0153559	0.00192383	0.00249362	0.00274203	0.00803933	0.0060901	0.00131363	0.00363703	0.0171496	0.0140909	0.0318407	0.020818	0.00165771	0.00529726	0.012177	0.00598613	0.00321142	0.0244781	0.0272913	0.00465487	0.00194323	0.0140508	0.00375377	0.0350408	0.0334126	0.0250848	0.23909	0.0178693	0.0128906	0.167308	0.0336676	0.0826349	0.0995227	0.0234828
ATAATCTTGGAGAACC-1	0.0100232	0.00632792	0.0220845	0.00236632	0.0228973	0.0949682	0.0256872	0.087979	0.188308	0.0287531	0.00168321	0.00379096	0.0251869	0.0216921	0.036141	0.00227908	0.0349096	0.00785134	0.0369616	0.0309608	0.0144167	0.0577898	0.0159032	0.00344263	0.0247054	0.00743484	0.00431141	0.0222981	0.0305892	0.00861275	0.0483173	0.00991694	0.0262011	0.0352095
ATAATTAGCTAAGTAG-1	0.00672996	0.0127462	0.010571	0.00194275	0.0127343	0.0860867	0.112189	0.113708	0.0675874	0.0354925	0.00769774	0.0302302	0.0143018	0.019001	0.0511568	0.0166901	0.00711942	0.0388998	0.0306306	0.0105272	0.0101664	0.0308051	0.00888172	0.0223671	0.0114413	0.0163542	0.0528571	0.0122834	0.025627	0.0363481	0.0199763	0.0099831	0.0154845	0.0413825
ATACAGGCCCTCCAAT-1	0.0113458	0.0120859	0.0288056	0.00676808	0.0222667	0.0961979	0.139111	0.155504	0.03732	0.0532714	0.0011745	0.0082731	0.00899287	0.0216603	0.0143795	0.0654216	0.0123042	0.0217127	0.00487435	0.0219971	0.00582034	0.0238895	0.00444082	0.00573253	0.00495453	0.0796249	0.00495899	0.00468387	0.0180978	0.00277878	0.0640275	0.0134936	0.0042234	0.0198073
ATACCACGGGCAACTT-1	0.0131916	0.00101841	0.000838272	0.000833659	0.00857545	0.0308913	0.065984	0.0438261	0.0575374	0.0660421	0.00741364	0.0750775	0.00361163	0.00551651	0.0274761	0.0114374	0.00242954	0.0234524	0.0430528	0.0024023	0.00713131	0.00275455	0.00247754	0.0259489	0.0125317	0.00839528	0.230332	0.00838537	0.00507924	0.127378	0.00566453	0.0123157	0.0267707	0.0342272
ATACCAGCAAATTGCT-1	0.319198	0.0863742	0.107708	0.0333522	0.00238882	0.0168628	0.0018515	0.00866993	0.0178774	0.00147719	0.000321124	0.02729	0.00258114	0.0054185	0.00524509	0.0753487	0.00636099	0.0874398	0.00392183	0.00879064	0.00743894	0.00906835	0.00369847	0.0021372	0.00372622	0.0809641	0.000345474	0.00187313	0.00581243	0.000350715	0.0464417	0.00438024	0.0012389	0.0140472
ATACCAGGCTAATAGA-1	0.0363929	0.0247786	0.100347	0.0168361	0.0183351	0.0795423	0.144663	0.141598	0.0120995	0.0410243	0.00500886	0.0245032	0.0108564	0.00580077	0.00864601	0.0589085	0.00322265	0.0385808	0.00236165	0.00494963	0.00139097	0.00972356	0.00579536	0.020297	0.00379818	0.0590999	0.0234445	0.00346884	0.0138608	0.0122654	0.0359067	0.0170564	0.0048243	0.0106128
ATACCAGGTGAGCGAT-1	0.0343128	0.00400983	0.00458049	0.00439487	0.0102313	0.0092931	0.00717093	0.00698857	0.0174836	0.0708701	0.0283257	0.0382101	0.0032403	0.00506536	0.0180418	0.0203766	0.00231053	0.0381557	0.0166044	0.00185903	0.00105671	0.00722313	0.00309429	0.0347035	0.0265707	0.01579	0.242001	0.0107396	0.00805958	0.146919	0.026858	0.0477372	0.0647674	0.0229553
ATACCGTCATCCATAA-1	0.041838	0.00728612	0.0145424	0.00301935	0.0152894	0.0802565	0.190369	0.148979	0.0145659	0.156394	0.00480657	0.0277535	0.00492484	0.00417132	0.00795075	0.0406689	0.00504771	0.0222284	0.0024424	0.00840304	0.000726084	0.00774913	0.00331937	0.0160535	0.00199002	0.0367767	0.0111404	0.00329063	0.00825033	0.0072064	0.0679512	0.0184849	0.00681478	0.00931041
ATACCTAACCAAGAAA-1	0.0122688	0.00487371	0.0216688	0.00598305	0.01256	0.11987	0.0809649	0.0837179	0.0590297	0.0516418	0.0141583	0.00940958	0.0243451	0.0321257	0.0460395	0.0083804	0.0221166	0.0418999	0.0134545	0.036936	0.0377786	0.0401659	0.0107816	0.00727623	0.0116062	0.0159271	0.00301119	0.0129458	0.0244751	0.00387902	0.0559649	0.01303	0.0112982	0.0504155
ATACGAGGTTTGTAAG-1	0.00380668	0.00826778	0.021832	0.0113073	0.0164527	0.0936613	0.0650434	0.105319	0.0506382	0.0407496	0.00479339	0.00846949	0.00713366	0.0191007	0.0230084	0.00927123	0.0150879	0.0293072	0.0226092	0.0328028	0.00666356	0.0221001	0.00604562	0.0113033	0.0186054	0.0211216	0.0685269	0.0141493	0.0285192	0.049177	0.0379326	0.0614917	0.0387567	0.0269454
ATACGCCGATCTACCG-1	0.341627	0.0529631	0.0687288	0.0147629	0.0013829	0.00683542	0.00140517	0.00332003	0.0201429	0.00256823	0.000613346	0.0671587	0.000496378	0.00349369	0.0106826	0.105024	0.00441101	0.0860568	0.00534247	0.000759727	0.0057904	0.00451893	0.00220402	0.0100975	0.00569354	0.0522235	0.0341986	0.00260269	0.00489208	0.0284018	0.0278949	0.00676153	0.00678716	0.0101583
ATACGCCGGCGAAACC-1	0.007433	0.00821102	0.0294332	0.00797045	0.0177939	0.115015	0.127386	0.166902	0.0320812	0.0337979	0.00279529	0.0044506	0.0265915	0.00711124	0.0474114	0.0432476	0.014032	0.0393254	0.00466287	0.0575603	0.0160442	0.0348837	0.00640516	0.00596518	0.00457976	0.0253276	0.00333918	0.00533052	0.0139049	0.00195301	0.0324045	0.0107351	0.00570244	0.0402124
ATACGGAACGTCGTTT-1	0.00642037	0.00559598	0.0296112	0.00132822	0.0135523	0.0982446	0.0123889	0.0763221	0.231093	0.0140067	0.00417934	0.000968456	0.0134803	0.0620805	0.0330157	0.000402392	0.0279523	0.0093048	0.0333805	0.0524727	0.0204338	0.050065	0.00867305	0.000769737	0.0108007	0.00715572	0.000481753	0.0112138	0.0479581	0.00218638	0.0727305	0.00610306	0.00835352	0.0272748
ATACGGGTTTCGATTG-1	0.0452811	0.0068362	0.0166173	0.00247883	0.0214717	0.0672554	0.0428845	0.0528026	0.0420392	0.0795563	0.018158	0.0157609	0.0442176	0.0253499	0.0649985	0.00653816	0.0248789	0.0349471	0.0156317	0.0232522	0.0123813	0.0594081	0.00624088	0.0124586	0.0138382	0.00937211	0.0220618	0.0162852	0.0220438	0.0217507	0.100828	0.0120921	0.0128019	0.0274814
ATACGGTGAAGATGCA-1	0.190342	0.0410278	0.187246	0.0263628	0.00626084	0.0249065	0.00870843	0.0210045	0.0168591	0.0281048	0.00124319	0.0424515	0.0016774	0.00351992	0.00912886	0.082974	0.00522952	0.0834726	0.00102128	0.000812535	0.00143424	0.00583614	0.00229746	0.00186128	0.00145014	0.130476	0.000376101	0.000775105	0.00475882	0.000283257	0.0480469	0.0107709	0.000960702	0.00831961
ATACGTACTTAGCCAC-1	0.00109064	0.0112642	0.0434863	0.00174895	0.0201155	0.138711	0.0313776	0.0899261	0.12761	0.0102648	0.00253489	0.000984015	0.0266333	0.022773	0.0459827	0.000716928	0.0248398	0.0177766	0.027475	0.0381515	0.0172888	0.0333672	0.00966477	0.00136664	0.0198003	0.0170769	0.00123523	0.0102053	0.0376323	0.00373273	0.0983337	0.0154095	0.00995521	0.0414681
ATACGTCCACTCCTGT-1	0.00737467	0.0144501	0.0277181	0.0131488	0.0435258	0.123682	0.144607	0.179145	0.0212488	0.0503629	0.00697253	0.0066376	0.0282929	0.00567745	0.0209339	0.0461355	0.0148263	0.0190523	0.00351637	0.011014	0.0103451	0.0269681	0.00569895	0.0116397	0.00455311	0.03036	0.00581146	0.00683327	0.0170856	0.00306665	0.0468212	0.0145934	0.00644116	0.0214597
ATACGTTATGCACGGA-1	0.00851146	0.00432158	0.00864219	0.00336848	0.0152277	0.0650576	0.136773	0.0956068	0.0552431	0.0465286	0.00264608	0.0461727	0.0199557	0.0116917	0.0760843	0.00841103	0.00414379	0.0335225	0.00523154	0.0134264	0.0165936	0.0139312	0.00956831	0.0263959	0.00716958	0.0130882	0.0626568	0.00983313	0.0142387	0.0461531	0.0122365	0.0111066	0.0115747	0.0848875
ATACTAGCATGACCCT-1	0.0189036	0.00838402	0.0590888	0.00769954	0.0282752	0.0918307	0.147897	0.180834	0.0148563	0.0913042	0.00160165	0.00896812	0.00632191	0.00374975	0.0238535	0.0320922	0.00652698	0.0166215	0.00921457	0.00680391	0.00221712	0.0133403	0.00414145	0.00734183	0.00441017	0.0646631	0.00605874	0.00372944	0.0203911	0.00332082	0.0699453	0.0149909	0.00403681	0.0165857
ATACTCTCGCCACTCT-1	0.0481321	0.00275806	0.00590289	0.0100818	0.016173	0.0255652	0.00949795	0.0176234	0.0160322	0.0260554	0.0216137	0.0335435	0.00345602	0.00714133	0.0165214	0.0106933	0.00674219	0.019921	0.0489183	0.00543441	0.0032043	0.0280651	0.00656784	0.0329864	0.0266231	0.0115477	0.212776	0.0183126	0.018667	0.137953	0.0347824	0.0313562	0.0590374	0.0263135
ATACTGCCTTACACCG-1	0.0105074	0.00258009	0.00393348	0.00942349	0.0147053	0.0184226	0.00587926	0.0119861	0.0348782	0.0293511	0.0445541	0.030231	0.00356023	0.0219479	0.0346448	0.00562702	0.00648298	0.025944	0.00869139	0.00416052	0.00356979	0.0294897	0.00417072	0.034228	0.0367609	0.00969748	0.202705	0.0169956	0.0142259	0.13912	0.0481623	0.0463357	0.0550182	0.0320101
ATACTTGTTCTCGAGC-1	0.0482142	0.007331	0.00823199	0.00221489	0.0184932	0.0912335	0.250927	0.205817	0.0166598	0.0915289	0.000211215	0.0321036	0.00164724	0.00159125	0.0106899	0.0266282	0.000492379	0.0154886	0.00627279	0.000312388	0.000287022	0.00085119	0.00162068	0.0194206	0.00170624	0.0235595	0.0669476	0.00191239	0.0058802	0.0190735	0.00184489	0.00786187	0.00472362	0.00822147
ATAGACAACGGGACCT-1	0.0232717	0.00485323	0.00499792	0.011861	0.0120608	0.0168866	0.0039098	0.00975483	0.0178307	0.0175108	0.0480927	0.0110027	0.00412151	0.010289	0.0182222	0.00810268	0.0118148	0.0299733	0.0124057	0.0130611	0.00167376	0.0220938	0.00333255	0.0305065	0.032076	0.0137595	0.211669	0.0163477	0.012101	0.162164	0.0507201	0.0577928	0.071134	0.0246064
ATAGACGAAGAGAAAG-1	0.0154266	0.00913359	0.0137242	0.00546941	0.0255656	0.103437	0.229022	0.209902	0.0437433	0.0595584	0.00123716	0.0130926	0.00416574	0.00528901	0.0127126	0.0476087	0.00322155	0.0243774	0.00623066	0.00379849	0.00183331	0.00685336	0.00379094	0.0135747	0.00202165	0.0359378	0.0107689	0.00251305	0.0114639	0.00392902	0.0394698	0.0144007	0.00442713	0.0122995
ATAGAGTACTGGGACA-1	0.00714656	0.0119551	0.019037	0.00301092	0.0249677	0.102343	0.193434	0.19735	0.0181538	0.061236	0.00468136	0.0135779	0.0170173	0.00806089	0.0317075	0.0262479	0.013293	0.0357078	0.00273549	0.022011	0.00202502	0.0195942	0.00552265	0.0126957	0.00419916	0.0344247	0.00703119	0.00430227	0.0162874	0.00300153	0.0335209	0.0199133	0.00498541	0.0188226
ATAGAGTTATCAACTT-1	0.0104209	0.00513905	0.0102709	0.00698148	0.0144619	0.0220186	0.00354269	0.0145292	0.0177021	0.0116491	0.0402864	0.0122966	0.00862605	0.0101779	0.0151387	0.004818	0.0126765	0.0113779	0.012501	0.0168054	0.00294797	0.0254375	0.00471209	0.028244	0.0351679	0.0250877	0.171333	0.0182385	0.0145677	0.120805	0.0986698	0.0805935	0.0947437	0.0180322
ATAGATTTGCAGTCGG-1	0.192902	0.0204302	0.0539657	0.0155216	0.008623	0.0352018	0.0212875	0.0235142	0.025914	0.04583	0.00917919	0.0674955	0.010923	0.010524	0.0208706	0.0554566	0.00531725	0.106172	0.00760186	0.00441437	0.0103653	0.0188718	0.00526253	0.015958	0.00693096	0.0452115	0.0292893	0.00678024	0.0119397	0.020391	0.0428971	0.0192883	0.00896866	0.0167014
ATAGCAACTAGGGAAG-1	0.0142966	0.00866354	0.00489632	0.00210196	0.0133853	0.0675091	0.0833432	0.0583634	0.133978	0.0410812	0.00508582	0.0300935	0.0226143	0.00906144	0.0413729	0.00808518	0.00692744	0.0203576	0.0137978	0.0157892	0.0305745	0.0130571	0.00999869	0.0283079	0.0133356	0.0100972	0.0932007	0.0138746	0.0155282	0.0640794	0.0255195	0.0155882	0.0217975	0.0442373
ATAGGCGGCTATAGAA-1	0.0225147	0.0102423	0.0231335	0.00624104	0.012683	0.016667	0.00972801	0.0163092	0.0314305	0.0254018	0.0061962	0.0129229	0.00111416	0.00715123	0.0139283	0.00948036	0.00913911	0.0254912	0.0231497	0.00471655	0.00117472	0.0156451	0.00370034	0.0321379	0.0296525	0.0247532	0.251942	0.0163589	0.0108639	0.165959	0.0284068	0.038733	0.0588047	0.0342269
ATAGGCTAGCTTCGCA-1	0.0948254	0.0322318	0.159838	0.0339383	0.0476098	0.0264843	0.0154361	0.0314614	0.0227053	0.0225981	0.00269134	0.0203123	0.00138048	0.00462429	0.01296	0.104247	0.00419127	0.0496429	0.00413775	0.00881107	0.00278856	0.0145658	0.00453209	0.00321151	0.00548407	0.129491	0.00224727	0.00473085	0.0257407	0.00287729	0.066147	0.0241801	0.00438853	0.00948885
ATAGGGATATCCTTGA-1	0.124195	0.0388538	0.168899	0.0404049	0.130387	0.0240202	0.00269832	0.0135731	0.0337625	0.00584376	0.00607459	0.0195546	0.00419621	0.0083481	0.0114458	0.0697741	0.0106447	0.0383506	0.00216622	0.00369001	0.00706062	0.0214302	0.00638884	0.00173023	0.00551078	0.100078	0.000351548	0.00437576	0.018518	0.000648712	0.0426078	0.0159563	0.00427511	0.0141854
ATAGGTTGGGCAGATG-1	0.00118817	0.00512039	0.0479158	0.00394904	0.0181169	0.111298	0.107353	0.132587	0.0361788	0.0318958	0.0383309	0.00305574	0.0160565	0.0136492	0.017144	0.0177436	0.0168974	0.0251753	0.00314653	0.0529517	0.00343568	0.0253481	0.00902283	0.00757258	0.01044	0.0359031	0.0136478	0.00924823	0.0235085	0.0130472	0.0731325	0.0341535	0.0130761	0.0287102
ATAGTCTTTGACGTGC-1	0.0281025	0.0055992	0.0120263	0.0015098	0.0167013	0.0928306	0.0209733	0.0610253	0.138545	0.116166	0.00872953	0.00611721	0.0044198	0.00847077	0.035912	0.0109241	0.0315188	0.042788	0.0187368	0.0168756	0.00862844	0.0373172	0.00888292	0.00593855	0.01262	0.00585326	0.021982	0.0114056	0.0240306	0.0240873	0.0784555	0.0306062	0.0170237	0.0351966
ATAGTGAAGCGTTCTC-1	0.00439016	0.00606553	0.0368649	0.0078809	0.025658	0.109075	0.19105	0.214636	0.0203126	0.0708398	0.000818315	0.0106534	0.0138436	0.00361733	0.00927784	0.0234413	0.0052348	0.0133541	0.00707752	0.0166928	0.00278441	0.0160419	0.00532145	0.0107963	0.00301478	0.0525785	0.00696728	0.00310505	0.023245	0.00282134	0.0491957	0.0113751	0.00538373	0.0165866
ATAGTTCCACCCACTC-1	0.0565084	0.00541643	0.0183004	0.00658027	0.0140501	0.0384928	0.0111521	0.0239416	0.0570514	0.0904442	0.0141557	0.0244729	0.0281913	0.0260772	0.059155	0.00701363	0.0160474	0.0110117	0.0270773	0.00992221	0.00451844	0.0247788	0.0079558	0.0200148	0.0167078	0.0161392	0.102272	0.0132214	0.0120497	0.0824869	0.0687424	0.0255706	0.0313722	0.0291078
ATATAAAGCGCTCGTG-1	0.00299257	0.00770993	0.00845272	0.0019807	0.0161705	0.0947922	0.104867	0.086359	0.0655905	0.0468071	0.0164973	0.0148584	0.0247468	0.0194267	0.0676249	0.0102419	0.0159145	0.0503253	0.0158051	0.039432	0.0188971	0.0355874	0.0130647	0.024772	0.0100372	0.0131475	0.00961733	0.0123256	0.0213494	0.00880278	0.0272312	0.0097084	0.00858571	0.0762789
ATATAAATGTAGCTGC-1	0.0114558	0.0109975	0.0247903	0.00251196	0.017749	0.113273	0.0300477	0.0830437	0.16847	0.0269359	0.00189069	0.00380088	0.0157224	0.0179101	0.0509642	0.00448117	0.0424809	0.00617494	0.0203443	0.0444854	0.011559	0.041598	0.0123522	0.00244324	0.0160558	0.0149024	0.00204444	0.0235226	0.0340875	0.00848187	0.0766552	0.0135677	0.00785208	0.0373476
ATATAACACGGGCGCA-1	0.033595	0.0105014	0.00998078	0.00376244	0.0128216	0.0709154	0.130906	0.113565	0.0843061	0.0596816	0.0038159	0.0275234	0.00742173	0.00775433	0.0386667	0.0188751	0.00353108	0.0428245	0.0148634	0.00433363	0.0186976	0.00558066	0.00488145	0.0191301	0.00655849	0.0237708	0.0568506	0.00557577	0.0104351	0.0306793	0.0161489	0.0145666	0.0100359	0.0774435
ATATACGCTCGTGACG-1	0.00428126	0.0032132	0.00327235	0.000920396	0.0163115	0.0776774	0.269799	0.15757	0.0213115	0.0535678	0.00116948	0.032806	0.00695675	0.0014578	0.0229387	0.0474466	0.00159682	0.019862	0.00331159	0.0012216	0.00295366	0.00298042	0.00428009	0.0293816	0.00392159	0.0249213	0.0795804	0.00557311	0.0121154	0.0397209	0.00364254	0.0111476	0.00840327	0.024686
ATATAGAGTATTGGTC-1	0.268725	0.01895	0.203483	0.0122424	0.00274728	0.0475601	0.00473521	0.0258176	0.120403	0.00506686	0.000528289	0.00274913	0.00125795	0.0228691	0.00591908	0.0171569	0.00896586	0.0384989	0.0512597	0.0150341	0.00744134	0.0155275	0.00294495	0.0003934	0.00360123	0.0294255	0.000375591	0.00271306	0.00945533	0.000606924	0.0418859	0.00427199	0.0027805	0.00460733
ATATCAACCTACAGAG-1	0.0114208	0.00561571	0.0344749	0.00363147	0.0173536	0.0790975	0.0134367	0.0423325	0.0729989	0.0200765	0.0191707	0.00513149	0.0105977	0.0215568	0.0691931	0.00237053	0.0353453	0.00970844	0.0266728	0.0294109	0.00975586	0.045882	0.00840215	0.0100024	0.0321432	0.0194584	0.0638632	0.0192421	0.0297542	0.0474691	0.0895213	0.0308134	0.0310426	0.0330536
ATATCAATTCCAGCCT-1	0.0302761	0.0118269	0.0191304	0.00411273	0.0307822	0.0805664	0.186806	0.146562	0.0172517	0.106495	0.00493046	0.0188712	0.0111155	0.00899435	0.0206626	0.0266464	0.0052919	0.0254887	0.00665909	0.018792	0.00298752	0.0147522	0.00473036	0.013208	0.00376126	0.0499545	0.0127833	0.00362131	0.0154471	0.00564179	0.0524756	0.0148034	0.00503406	0.0195379
ATATCGGTAGGGAGAT-1	0.000990297	0.0103532	0.0312799	0.00618464	0.0222361	0.130003	0.0645563	0.110508	0.0481225	0.0270058	0.0165025	0.00743605	0.0342957	0.0328439	0.0614667	0.00094957	0.0401079	0.0567061	0.0436883	0.0290761	0.0212674	0.032268	0.0072107	0.00412712	0.0088621	0.0106886	0.00240574	0.00792303	0.0155721	0.00307548	0.0626126	0.00825448	0.01027	0.0311498
ATATCGTGCCAGACCC-1	0.0271431	0.00510349	0.0190288	0.00838193	0.0160997	0.10461	0.126896	0.139565	0.0446388	0.0648489	0.0123054	0.0168238	0.0241125	0.00805912	0.0169205	0.0155394	0.0158048	0.0390336	0.0204003	0.0263015	0.00445052	0.0217677	0.00464704	0.00818757	0.00637582	0.0248802	0.0160537	0.0053091	0.0138717	0.014033	0.062958	0.0199925	0.00909824	0.0367575
ATATCGTTCCTCGAAC-1	0.0107169	0.00691262	0.0180655	0.00983603	0.0270119	0.0781321	0.0820122	0.0801234	0.0529372	0.0519827	0.0128555	0.0218803	0.0542338	0.0155367	0.0258003	0.0140022	0.016007	0.0326219	0.0109025	0.0159581	0.0332417	0.0550225	0.0130789	0.0144479	0.0125692	0.0127201	0.0227208	0.0162581	0.0341033	0.0191152	0.0482575	0.0146716	0.0145943	0.0516704
ATATCTCCCTCGTTAA-1	0.194391	0.16076	0.119681	0.026664	0.0267276	0.00942514	0.00074082	0.0056313	0.0298016	0.000584142	0.00595532	0.00932014	0.00066378	0.0014521	0.0257193	0.121182	0.00595227	0.0564777	0.00282488	0.00638721	0.0102747	0.0243772	0.00509637	0.000720925	0.00218671	0.0474435	8.43304e-05	0.00146318	0.0124332	0.000120365	0.0663887	0.00509419	0.0012435	0.0127316
ATATCTTAGGGCCTTC-1	0.0205795	0.0124302	0.00790883	0.00116391	0.00694591	0.0818342	0.0749119	0.0774633	0.133469	0.0564047	0.00698486	0.0230637	0.0140985	0.0097479	0.043475	0.00707083	0.00818247	0.0240904	0.0143763	0.00592421	0.013367	0.0373226	0.0070671	0.0163175	0.00959526	0.00995518	0.0266491	0.00894956	0.0160128	0.0183506	0.0497731	0.0140178	0.0130642	0.129433
ATATGGGATAGCAACT-1	0.0148796	0.00774306	0.0208702	0.00377971	0.00950908	0.0530637	0.00955747	0.034303	0.0661706	0.0135353	0.00627979	0.00792854	0.00394137	0.0174075	0.0394069	0.00421609	0.0128249	0.0183943	0.0279489	0.0256526	0.00573318	0.0448828	0.00946656	0.0242555	0.0332856	0.0183316	0.134266	0.0221994	0.0313203	0.0920166	0.0626677	0.027139	0.0595782	0.0374447
ATATGTCTAGAGCGTG-1	0.00753967	0.00265699	0.00398769	0.00231407	0.0109314	0.0552776	0.123878	0.0789574	0.0747819	0.0757956	0.00725998	0.0516819	0.0283128	0.00648871	0.0405622	0.0160555	0.00855215	0.0610313	0.00418432	0.006448	0.0096674	0.00966982	0.0088578	0.0428437	0.00774658	0.0115429	0.0851211	0.0113222	0.0126292	0.0441639	0.0126763	0.0164498	0.017124	0.0434884
ATATGTCTCCCTAGCC-1	0.0182397	0.00108865	0.00397508	0.00404169	0.0114523	0.013574	0.0032619	0.00950008	0.0393952	0.0348033	0.0215696	0.0153218	0.00472279	0.0105904	0.0293963	0.00635294	0.00494642	0.0244463	0.026023	0.00778977	0.00356697	0.0181494	0.00419953	0.0359263	0.0338166	0.0134181	0.227231	0.0197214	0.0147544	0.154706	0.066847	0.0311664	0.0491763	0.0368293
ATATTCAGTTAAACCT-1	0.00851837	0.00515312	0.0185105	0.00648104	0.0117742	0.058484	0.0660933	0.0655547	0.0392474	0.0431911	0.0130869	0.0240718	0.0160718	0.0113575	0.0562287	0.0181904	0.018979	0.0639015	0.00595398	0.0226683	0.0142795	0.0175536	0.0102284	0.0299939	0.0163723	0.0247843	0.0760113	0.0117711	0.0159101	0.0427362	0.034525	0.0494744	0.0514623	0.0313801
ATATTCCACATAGTGA-1	0.00480072	0.00379574	0.0097725	0.00308102	0.0118675	0.0871042	0.0185177	0.0540653	0.214574	0.0227724	0.00438179	0.00205168	0.00828811	0.0220122	0.0287376	0.00102191	0.0307543	0.00436641	0.0621748	0.034035	0.0160713	0.0390987	0.00990219	0.00431804	0.0269766	0.011907	0.0390796	0.0188654	0.0208019	0.0323202	0.0710628	0.0248906	0.0184442	0.0380862
ATATTCCCACAGGTCA-1	0.0859788	0.0279394	0.106146	0.0115309	0.0212334	0.06977	0.0756109	0.0960541	0.0174445	0.0287045	0.0029133	0.0188976	0.00485135	0.00489066	0.0167753	0.0393777	0.00897062	0.0316516	0.00489576	0.0123495	0.00534086	0.0254595	0.00607451	0.011734	0.0103968	0.0764465	0.0228392	0.00659722	0.020147	0.015886	0.061373	0.0162275	0.0161276	0.0193645
ATATTGCTGTCAAAGT-1	0.005007	0.00559947	0.00405465	0.00437542	0.0209423	0.0146359	0.00688838	0.0143601	0.0157447	0.0135677	0.016484	0.028249	0.0217685	0.00436087	0.0492653	0.00184238	0.00398752	0.00724729	0.0239849	0.00208783	0.00687368	0.00719372	0.00358075	0.0447703	0.0277664	0.0135683	0.248656	0.0169697	0.0126311	0.160942	0.0182529	0.0370411	0.0745409	0.0627597
ATATTTAACCCTCAAG-1	0.0298422	0.0026936	0.00376775	0.00118905	0.0165277	0.0628619	0.146321	0.085872	0.0665409	0.069057	0.00166785	0.0302283	0.0117704	0.0201115	0.0361571	0.0102133	0.00444739	0.0390149	0.0079994	0.00421216	0.0157686	0.0115958	0.0138946	0.023149	0.00657761	0.0160511	0.0788793	0.00837669	0.0249861	0.0365853	0.0230049	0.0112391	0.0106285	0.0687676
ATCAAACACTGTTCCA-1	0.027504	0.013851	0.0169694	0.00544619	0.0119467	0.0661776	0.0676499	0.0841037	0.066201	0.0432292	0.022546	0.0164697	0.00889165	0.0141652	0.018799	0.0171581	0.00882617	0.0112581	0.0275224	0.0124593	0.00905159	0.0166529	0.00631435	0.0255675	0.01586	0.0157756	0.111865	0.0120351	0.0137102	0.0753021	0.0602897	0.0200045	0.0290401	0.0273569
ATCAAACGAAGGTTTG-1	0.00211453	0.00674501	0.0165994	0.00286062	0.0174979	0.115495	0.0339754	0.0853784	0.0747996	0.0251725	0.0038588	0.00182544	0.0119022	0.0448023	0.0261963	0.00177231	0.0330832	0.0234533	0.0379333	0.0186918	0.0191143	0.0587507	0.0165358	0.00940612	0.0247574	0.0213363	0.0350003	0.0171713	0.0288327	0.0286183	0.0674365	0.0208391	0.0347319	0.033312
ATCAAAGAGCCGTGGT-1	0.00884583	0.00402486	0.00704415	0.00222047	0.0271399	0.0615426	0.141157	0.114462	0.0298564	0.0569334	0.00809563	0.0407512	0.0166188	0.0265925	0.0171898	0.0102522	0.00394827	0.0562226	0.00740929	0.00919498	0.00536153	0.0110939	0.00539788	0.0245234	0.00793862	0.0211791	0.074961	0.00852364	0.0153616	0.0471559	0.0558757	0.0216183	0.0213208	0.0301868
ATCAAGATCCCAGGAC-1	0.0119485	0.00474393	0.00485585	0.00333677	0.0100282	0.0371476	0.0169694	0.0205682	0.0270596	0.0352776	0.0197573	0.0315388	0.0138948	0.0251634	0.0580745	0.00905046	0.0118038	0.0210691	0.0219365	0.0103098	0.00622647	0.0228907	0.00590408	0.0327904	0.0314778	0.0123972	0.17084	0.016817	0.0160862	0.109782	0.0281403	0.0515327	0.0643771	0.036204
ATCAATCTGGGCTGCA-1	0.0144416	0.0064242	0.00855722	0.00360447	0.0132885	0.0734013	0.141473	0.131732	0.0648737	0.0604282	0.0029915	0.0370448	0.00589893	0.00418213	0.0306447	0.0140898	0.0043261	0.0308608	0.017815	0.0029821	0.0125378	0.00829155	0.00496851	0.0174118	0.00816638	0.020596	0.0988737	0.00846007	0.0148848	0.0603813	0.0158027	0.0135893	0.0175101	0.0294655
ATCAATGCCGTGGCTG-1	0.0718069	0.0180402	0.0202092	0.00797621	0.00970588	0.0775139	0.0954092	0.094771	0.0510729	0.0632987	0.00719214	0.037499	0.00880727	0.0114012	0.0169317	0.0142918	0.0113563	0.0284035	0.0173447	0.00555699	0.00450933	0.0246017	0.0068984	0.0202706	0.0116123	0.0204293	0.0684832	0.00927319	0.0127586	0.0488289	0.0367116	0.0163058	0.0194814	0.0312469
ATCACATTAGAATATC-1	0.0596494	0.00176613	0.00234055	0.00289349	0.115025	0.00652693	0.00126643	0.00426947	0.0270657	0.0725904	0.023821	0.0153473	0.00219509	0.00574013	0.0277841	0.0085906	0.00484861	0.0198716	0.037002	0.00967062	0.00354242	0.0172986	0.0035858	0.02272	0.0244166	0.00878289	0.126569	0.0116925	0.00837984	0.0860499	0.135832	0.0407912	0.0396612	0.0224143
ATCACGTGCTAATTAA-1	0.022076	0.00277424	0.00198888	0.00176227	0.0150465	0.0487866	0.0691989	0.0821994	0.0526869	0.0417242	0.0071653	0.0254623	0.00890772	0.00668161	0.0256511	0.0102617	0.00280224	0.0198114	0.0353485	0.00615549	0.00401928	0.0103928	0.00374334	0.0301056	0.0248916	0.0158229	0.190258	0.0119272	0.0110181	0.103559	0.0248293	0.0205258	0.036805	0.0256117
ATCACTTCATCCTCGC-1	0.0583505	0.0219501	0.130918	0.0185886	0.145553	0.0483189	0.0219473	0.0663719	0.0259329	0.0136619	0.00318848	0.00785237	0.00158547	0.0120799	0.015412	0.0684542	0.0158545	0.0418879	0.0024895	0.0181763	0.00350336	0.0247198	0.00405552	0.00153667	0.0044471	0.071021	0.000586112	0.00327887	0.0183888	0.000595692	0.0869922	0.0209447	0.00406593	0.0172906
ATCAGACGGCACGCCG-1	0.013604	0.014252	0.0176423	0.0112686	0.0163429	0.0859522	0.14098	0.14299	0.0233435	0.0446776	0.00170529	0.0162715	0.0119146	0.00966711	0.0266082	0.0176961	0.00791802	0.0403245	0.00661486	0.0173631	0.00148538	0.0155404	0.00559302	0.0152872	0.0111214	0.0541283	0.0490803	0.00718949	0.0150389	0.0290119	0.0461585	0.0310631	0.0286574	0.023509
ATCAGCCTCATGCTGC-1	0.0134145	0.00551802	0.0207064	0.00398657	0.0136718	0.0390057	0.0108204	0.0276902	0.0334908	0.0259018	0.0343202	0.0150785	0.0125092	0.0139828	0.0135415	0.00640493	0.00953135	0.0335564	0.0119932	0.00941818	0.00292194	0.0395194	0.0069353	0.029449	0.0310005	0.0215668	0.159341	0.0228472	0.0275107	0.100667	0.057706	0.0404713	0.075783	0.0297388
ATCAGCTCGTCCACTA-1	0.0050375	0.00464833	0.0351281	0.00650151	0.0172962	0.0506877	0.00794781	0.0402598	0.0538014	0.0233869	0.0391741	0.00999736	0.0120452	0.0171918	0.0125642	0.00338142	0.0244209	0.0207614	0.0129361	0.020063	0.0090859	0.0425274	0.00852236	0.0220422	0.034272	0.0146325	0.0975008	0.019841	0.0456766	0.0804568	0.0819315	0.0449285	0.0584686	0.0228831
ATCAGGTCGCCATTGC-1	0.121627	0.0293476	0.205037	0.0550469	0.0059848	0.00670433	0.00149095	0.00360878	0.0480401	0.0172681	0.00261526	0.0426671	0.00917973	0.00163214	0.012205	0.15884	0.00572176	0.132375	0.00606234	0.000796357	0.00308871	0.00853254	0.00275265	0.00226484	0.00171815	0.0626304	0.000341031	0.000969097	0.00452887	0.000326499	0.0304944	0.00537744	0.000998154	0.00972726
ATCAGTAGGCAGGGAT-1	0.0310767	0.0146803	0.0330069	0.00649288	0.0502036	0.100989	0.116789	0.128343	0.0381501	0.0438953	0.0019469	0.00857993	0.0132298	0.0134929	0.0208062	0.025206	0.00799815	0.0259941	0.00464317	0.030628	0.0160323	0.0293887	0.00480124	0.00829928	0.00673285	0.0311069	0.0117314	0.00698824	0.0150481	0.00716005	0.0895738	0.0181962	0.00916654	0.0296234
ATCATAGATCGACGAG-1	0.0136058	0.0105538	0.0157393	0.00422803	0.0190795	0.0862555	0.0612022	0.0872838	0.0551189	0.0313287	0.00607954	0.0139014	0.00961009	0.015323	0.0249558	0.0178266	0.0102536	0.0213429	0.0291203	0.0110304	0.00354455	0.033476	0.00774469	0.0166564	0.0180022	0.0391369	0.0996155	0.0112481	0.0209155	0.0676287	0.0293795	0.0243344	0.0314044	0.053074
ATCATAGCCCTATGTA-1	0.0125636	0.00501928	0.00679701	0.00286417	0.0170941	0.0759731	0.171391	0.116712	0.0573894	0.0528473	0.0051756	0.0219679	0.00784864	0.00810131	0.0538565	0.0366386	0.0106927	0.0338767	0.041766	0.00706998	0.0128437	0.0101707	0.0113783	0.0220592	0.00804031	0.0338536	0.0330481	0.00771659	0.0143116	0.0168964	0.0192537	0.0189196	0.00814035	0.0377231
ATCATCCAATATTTGT-1	0.0264983	0.01014	0.0324397	0.00489198	0.0233897	0.0665437	0.135157	0.113887	0.0669008	0.0944918	0.00143563	0.0229638	0.0174387	0.0101819	0.0258143	0.0282496	0.00622329	0.0415869	0.0197705	0.00826491	0.00963755	0.0172082	0.00586216	0.0132389	0.00562576	0.0319786	0.0252789	0.00589131	0.0140339	0.0115969	0.0427086	0.0191618	0.00857413	0.0329344
ATCATCTGCCCAGTGT-1	0.020879	0.00479414	0.0109092	0.00401382	0.0129584	0.054726	0.117957	0.05568	0.0505195	0.118417	0.0115698	0.0476319	0.0293361	0.0119236	0.0635696	0.0301302	0.0108789	0.079902	0.00232347	0.0363927	0.0171085	0.0222319	0.0136164	0.0301879	0.0037616	0.00773377	0.0135975	0.00801074	0.00950006	0.0085697	0.0294557	0.0143973	0.00591608	0.0414011
ATCCAACGCAGTCATA-1	0.00760301	0.0139382	0.02143	0.00512144	0.0394622	0.111424	0.169547	0.244894	0.0185013	0.0497274	0.00211543	0.00607171	0.00612276	0.0113	0.014519	0.0368722	0.00602239	0.0161143	0.00312708	0.0129528	0.00375454	0.0164734	0.00313974	0.00589136	0.00283632	0.0669146	0.00525531	0.00293204	0.0189879	0.0023655	0.0341554	0.0163144	0.00460524	0.0195073
ATCCAATGGAGGGTCC-1	0.00356207	0.00353605	0.0041672	0.00223271	0.0189119	0.08276	0.204224	0.162543	0.0204098	0.0394605	0.0076757	0.0223835	0.0104623	0.0131547	0.0354824	0.0207026	0.0036118	0.0243663	0.0176812	0.00464457	0.00237529	0.00843686	0.00520039	0.0338203	0.00674313	0.0277133	0.0847021	0.00640865	0.0146746	0.0455385	0.0111782	0.0140578	0.0169029	0.0202759
ATCCACATCGACAGAA-1	0.00573387	0.00743865	0.0615053	0.00421978	0.0112957	0.0775636	0.0125345	0.0580673	0.0410989	0.0164424	0.0188222	0.00256185	0.00844673	0.0769563	0.0259997	0.00551984	0.0391315	0.0214116	0.0127287	0.0246918	0.0209114	0.0541422	0.00617652	0.00830501	0.0274774	0.0201188	0.0580184	0.016003	0.0272357	0.0451166	0.0775846	0.0302425	0.0405989	0.0358988
ATCCACGCTAAATGTT-1	0.0558357	0.000591491	0.00112965	0.000597359	0.010344	0.0149843	0.00678651	0.00894881	0.0965575	0.220509	0.014719	0.0564524	0.0143452	0.0150994	0.0237	0.00523391	0.0114366	0.0323711	0.0153635	0.00939056	0.0101469	0.0148081	0.0061698	0.0253657	0.0116058	0.00231918	0.083589	0.0138914	0.00662329	0.067804	0.076953	0.0216192	0.0197504	0.0249582
ATCCACTTTCAGACTA-1	0.0353885	0.00973067	0.0293911	0.00673089	0.0359464	0.0580244	0.155308	0.121693	0.0203491	0.205418	0.00132023	0.0120013	0.00935626	0.00674074	0.00991291	0.0232315	0.0099096	0.0179102	0.00184532	0.0084067	0.00162544	0.0138099	0.00239323	0.00624074	0.00209773	0.0417013	0.00389674	0.00229371	0.0067606	0.00310356	0.105039	0.0160574	0.00265587	0.0137088
ATCCAGAGCAACAACC-1	0.022064	0.00299904	0.0101035	0.00102018	0.0105132	0.127569	0.0238823	0.0834469	0.128258	0.0229971	0.00714598	0.00229869	0.0390781	0.0379021	0.0487027	0.00140662	0.0374448	0.0110898	0.0322768	0.019941	0.0128833	0.0549771	0.014818	0.00379109	0.0194911	0.00600296	0.0091583	0.0180373	0.0352402	0.0148509	0.0664442	0.0108502	0.0144172	0.0488981
ATCCAGGATTCGTGAA-1	0.106508	0.0351533	0.117923	0.0231663	0.00816652	0.0477385	0.0823252	0.0841736	0.0179309	0.0310218	0.000825686	0.0501223	0.00555269	0.00159448	0.0106468	0.114135	0.00188693	0.0749444	0.000768057	0.00146826	0.00546686	0.00727393	0.00312039	0.00777663	0.00139017	0.105114	0.00588866	0.00153276	0.00883048	0.00209181	0.0172619	0.00607627	0.00222491	0.00989964
ATCCCATCCACAGCGC-1	0.214894	0.03941	0.143323	0.0456553	0.00141282	0.0111415	0.00194067	0.00684712	0.0452657	0.00372253	0.000915142	0.0412273	0.00774766	0.00375104	0.0229584	0.124176	0.00447479	0.0690281	0.00273135	0.00207116	0.00396461	0.00879444	0.00370792	0.00321172	0.00258445	0.106943	0.000620737	0.00168915	0.00956241	0.00053463	0.0423128	0.0120814	0.00184246	0.00945671
ATCCCATTTCCGTGGG-1	0.00152826	0.00467217	0.0341522	0.00570579	0.041978	0.0745485	0.0265725	0.0692628	0.0348256	0.0237578	0.0159711	0.0052139	0.0078036	0.0131717	0.0170328	0.00206497	0.0299571	0.0254999	0.0126498	0.0305156	0.00322114	0.0326607	0.00653277	0.0126394	0.0241315	0.022705	0.0793257	0.0162763	0.0368351	0.0578096	0.0496014	0.0643561	0.0802099	0.0368112
ATCCTACCTAAGCTCT-1	0.0626961	0.0286856	0.172474	0.024748	0.00744432	0.0533581	0.0927819	0.107064	0.0198907	0.0265276	0.00207984	0.0278034	0.00681999	0.00483462	0.0081326	0.0845402	0.00235641	0.0611664	0.00186912	0.00381728	0.00151368	0.00705108	0.00624348	0.00853985	0.00206019	0.114039	0.00490707	0.00182672	0.0125852	0.0018458	0.0200802	0.0107303	0.0023823	0.00710479
ATCCTGAATCGCTGCG-1	0.0142128	0.0026025	0.00324224	0.000888776	0.0123599	0.0920801	0.171537	0.127357	0.034322	0.0526641	0.00425602	0.0474235	0.0165539	0.00538267	0.0775977	0.0179924	0.020874	0.0317096	0.0124687	0.00311898	0.00503507	0.00370644	0.00318322	0.0267146	0.00838093	0.0169979	0.0813784	0.00614137	0.00672972	0.035339	0.00703004	0.0116297	0.0105047	0.0285854
ATCCTGCGTGGAATGG-1	0.109717	0.0335083	0.161256	0.0430281	0.00823073	0.0385968	0.0405672	0.0470072	0.0283516	0.0143985	0.00138092	0.0253593	0.00255528	0.00886841	0.00948768	0.14261	0.0043479	0.0851254	0.00188702	0.00166968	0.000881198	0.00911083	0.0053336	0.00452568	0.00295885	0.102346	0.00252344	0.00204251	0.0100678	0.00133768	0.0294045	0.00757706	0.00245632	0.0114812
ATCCTGCTGCAGATAG-1	0.0107139	0.00464077	0.00135834	0.011845	0.0126773	0.0089356	0.00126642	0.00516281	0.0317219	0.0196712	0.0206647	0.0229265	0.00139035	0.0128545	0.00973731	0.0063461	0.00438889	0.00947648	0.0133747	0.00704888	0.00182392	0.0235865	0.00347441	0.0332952	0.0343026	0.00975821	0.266033	0.0162535	0.0120157	0.18	0.0301991	0.0572017	0.0953055	0.0205487
ATCGACCCAATACAGA-1	0.196876	0.030121	0.166265	0.0394602	0.00164055	0.0181444	0.00161896	0.0109729	0.0296202	0.00197571	0.00149468	0.0152193	0.00119065	0.00752705	0.0458195	0.14876	0.00769932	0.05222	0.00111925	0.0160881	0.00159596	0.0170836	0.0032343	0.00067118	0.00262846	0.0991132	0.000175901	0.00165871	0.0105785	0.000219652	0.0566753	0.00490905	0.00176563	0.0058581
ATCGACTCTTTCCGTT-1	0.00654788	0.00537245	0.0213512	0.00349043	0.0485187	0.0876178	0.15071	0.132317	0.0182436	0.0895543	0.018766	0.0112305	0.0261836	0.0035363	0.0304885	0.0302172	0.0163325	0.0497946	0.00321667	0.00862192	0.00988181	0.0139452	0.0113874	0.0131717	0.00434562	0.0245144	0.00752822	0.0054559	0.0148131	0.00607778	0.0702678	0.0196316	0.00764035	0.0292274
ATCGCACGCCGGGAGA-1	0.00430828	0.010592	0.0296626	0.00936533	0.0239382	0.0974823	0.168944	0.146378	0.0177227	0.0843689	0.00769193	0.0156862	0.0203568	0.0108661	0.0566927	0.0244704	0.00807928	0.0391465	0.00160934	0.0118342	0.0151951	0.0115472	0.0059304	0.0210671	0.00350826	0.0292051	0.00844815	0.00488062	0.0140739	0.00364468	0.024283	0.0142437	0.00414223	0.0506347
ATCGCCAGTCAACATT-1	0.209372	0.0654577	0.161793	0.0277934	0.00215654	0.0208093	0.00170326	0.0112986	0.0319131	0.000998953	0.0133156	0.016323	0.00195798	0.0174407	0.0323645	0.139172	0.00625805	0.0432868	0.00426355	0.0108205	0.00395397	0.0268899	0.0033592	0.000939951	0.00305295	0.0556794	0.000171947	0.00161713	0.00886691	0.000170261	0.0503558	0.00412238	0.00162369	0.0206973
ATCGCTGCGTGCAGCA-1	0.0486597	0.00171122	0.00296317	0.00156731	0.00716013	0.0206662	0.0291186	0.00779505	0.0267472	0.118864	0.0343821	0.0629513	0.0223042	0.0244712	0.0854217	0.00918018	0.00951353	0.0503452	0.0156585	0.0110301	0.00524606	0.00882694	0.00878029	0.0445071	0.0174372	0.00700391	0.0935251	0.0145422	0.00726336	0.0648699	0.0606867	0.0192386	0.0286969	0.0288648
ATCGGAGACAGACGGC-1	0.0131364	0.00606111	0.0197674	0.00206825	0.0143105	0.0730308	0.0102117	0.0425411	0.132134	0.0305484	0.00665586	0.00930999	0.0320841	0.015443	0.056542	0.00126465	0.0302875	0.0137695	0.0376602	0.0437978	0.0343679	0.0495025	0.0265192	0.00615048	0.0189771	0.00690894	0.0290811	0.0167612	0.0423316	0.0330276	0.0817383	0.014751	0.019686	0.0295723
ATCGGCAAGCAGTCCA-1	0.0128258	0.00264383	0.00542705	0.00149431	0.0276872	0.0686493	0.156108	0.107814	0.065811	0.0842709	0.00335236	0.0220999	0.0160703	0.0100273	0.055224	0.012056	0.0095965	0.106989	0.0042653	0.0100366	0.00736784	0.0114433	0.00842487	0.0443363	0.00377624	0.0183578	0.0160321	0.00550376	0.00816884	0.00679449	0.0377191	0.0126549	0.00589874	0.0310724
ATCGTGGAAAGTCTGG-1	0.0230347	0.00593281	0.00625316	0.00688841	0.0128817	0.0500967	0.0383583	0.0539131	0.0512243	0.0179553	0.0105115	0.021425	0.00863351	0.00840771	0.0177316	0.018425	0.00756225	0.0242658	0.0332415	0.00818364	0.0057997	0.022693	0.00824811	0.0271243	0.0192771	0.0258647	0.157147	0.0161685	0.0241446	0.119613	0.0330799	0.0383021	0.0440635	0.0335488
ATCGTTAGCTAGCGGA-1	0.0100517	0.00366303	0.00846328	0.00168828	0.0123168	0.0680309	0.0513134	0.0494182	0.0755769	0.0439751	0.0132943	0.0403005	0.0338423	0.0203233	0.0376842	0.00969272	0.0198817	0.0403211	0.0179609	0.0172756	0.0211721	0.0418034	0.0155256	0.0291017	0.012348	0.00425665	0.0669539	0.0155768	0.0207633	0.0499286	0.0438374	0.0155684	0.0273316	0.0607584
ATCGTTCACTTTCGCC-1	0.0614649	0.00750948	0.0288264	0.00310513	0.0805425	0.0546961	0.121047	0.10619	0.0423643	0.0757033	0.00233961	0.0375352	0.00913991	0.00911531	0.0226345	0.0511046	0.010027	0.0261485	0.00902235	0.00322338	0.00298506	0.0151221	0.00386382	0.0131754	0.00635733	0.0377372	0.0471626	0.00503327	0.0105092	0.0228509	0.0320279	0.0152468	0.0123329	0.0138562
ATCTAATATCCTACGG-1	0.000648432	0.00710495	0.0217182	0.00220926	0.0137322	0.141366	0.0368993	0.0714523	0.0571601	0.0173787	0.0265316	0.0197724	0.0311351	0.0222495	0.0925312	0.00799055	0.025537	0.0519478	0.0609985	0.0421452	0.0430372	0.0380076	0.00928987	0.00881156	0.0101672	0.00443481	0.00140667	0.0108296	0.0240442	0.0019857	0.0316411	0.0126683	0.0105716	0.0425966
ATCTACCATCTGCTCC-1	0.247081	0.0298718	0.193789	0.0312722	0.00201979	0.025008	0.00227109	0.0112717	0.0261295	0.00439356	0.00294488	0.0167771	0.00278386	0.0047979	0.0214694	0.121598	0.0213996	0.0558497	0.00868124	0.00290151	0.00611052	0.0138113	0.00309878	0.000934279	0.0021607	0.0535713	0.000156582	0.00153977	0.00717431	0.000230043	0.0525479	0.00488575	0.00112651	0.020342
ATCTAGCTTGTGAGGG-1	0.00574187	0.00681623	0.0175599	0.00234039	0.0105757	0.0708845	0.0326984	0.0470307	0.111709	0.0300297	0.0108442	0.011455	0.0224728	0.0280562	0.0619942	0.00499097	0.0221408	0.0432887	0.050998	0.0301015	0.030688	0.0414539	0.0131732	0.0188608	0.0145624	0.0101783	0.0464564	0.0127187	0.0288334	0.0302726	0.0407304	0.0149253	0.0217741	0.0536438
ATCTCCCACGGAATAT-1	0.00975173	0.00201595	0.00472402	0.00174904	0.00755348	0.0624492	0.135284	0.0639093	0.0634116	0.0625794	0.00744689	0.0589761	0.0172523	0.00803128	0.108602	0.0409043	0.00851674	0.0511724	0.00461468	0.03234	0.0239109	0.0135921	0.0256803	0.0430593	0.00410529	0.00590615	0.0144634	0.0100524	0.0135726	0.0080952	0.0231537	0.0111276	0.00455363	0.0474439
ATCTCCCTGCAATCTA-1	0.0106564	0.00131607	0.00303898	0.00226178	0.228399	0.0230528	0.0238123	0.00975909	0.0477861	0.0462823	0.0110001	0.0812537	0.0541667	0.013746	0.0562497	0.0149024	0.00518492	0.0445459	0.0105384	0.00504356	0.0379751	0.0379957	0.0107524	0.0220835	0.0088203	0.00169492	0.00712313	0.0119375	0.0204495	0.00574786	0.0710288	0.0243662	0.0119215	0.0351074
ATCTCGTGAGCGAAAC-1	0.0180024	0.00797457	0.0105894	0.00118171	0.0155045	0.118721	0.018538	0.0804518	0.217501	0.0539268	0.0111958	0.00130668	0.0098768	0.0245871	0.0578481	0.00230304	0.017703	0.00764813	0.0494422	0.0589004	0.017831	0.0350433	0.00855372	0.00126166	0.00906754	0.00299398	0.000773008	0.0107478	0.0297719	0.00283964	0.0634759	0.00713358	0.00835835	0.0189465
ATCTGACATGGAAGGA-1	0.00196298	0.0105118	0.0270823	0.0108279	0.0170497	0.102421	0.255666	0.197639	0.0173596	0.0406686	0.000790813	0.00771929	0.00303992	0.0113248	0.0211194	0.0145244	0.0052656	0.0377686	0.00233364	0.00839687	0.00165387	0.00958761	0.00479786	0.0125917	0.00337421	0.0656584	0.0200161	0.00354608	0.0139515	0.0116842	0.0150801	0.0110799	0.00620051	0.0273058
ATCTGCACCTCTGCGA-1	0.0357681	0.012275	0.0352501	0.00768033	0.0250419	0.046584	0.0694593	0.0715198	0.0210209	0.0871347	0.00649991	0.021265	0.00552036	0.0141533	0.0170564	0.015591	0.0106198	0.0394201	0.00672117	0.0126801	0.00792648	0.0342063	0.0103909	0.019455	0.0159275	0.0514193	0.0760414	0.0103913	0.0154289	0.0484599	0.0630554	0.0290138	0.0322416	0.024781
ATCTGCTGTTATCGCC-1	0.00169152	0.00726478	0.0116383	0.00263792	0.010745	0.130045	0.0689033	0.0833869	0.0687197	0.0351789	0.00355247	0.0133616	0.0402236	0.0315226	0.0839648	0.00410925	0.0337595	0.03766	0.0421237	0.027185	0.026001	0.0291528	0.0163445	0.0147848	0.0144528	0.0067051	0.00513394	0.0174286	0.0184298	0.00642637	0.0237168	0.0160605	0.00816765	0.0595219
ATCTGGGCTGTTCTTG-1	0.0166281	0.00644287	0.015458	0.00604659	0.0167191	0.0786749	0.0826147	0.0888939	0.0502337	0.0654102	0.00995147	0.0130409	0.021447	0.0563822	0.0262105	0.00675832	0.0180558	0.0164732	0.0144243	0.0231978	0.0160586	0.0174459	0.0065832	0.0150666	0.0205027	0.0192534	0.0565068	0.0143015	0.0271964	0.0441987	0.0434879	0.0191005	0.0222128	0.0450215
ATCTGGTTAAGACTGT-1	0.0148336	0.00653633	0.0118488	0.00233578	0.031144	0.11851	0.03411	0.0895873	0.0821891	0.0271547	0.00433899	0.0036468	0.011258	0.0379803	0.0166816	0.00751326	0.0306875	0.0165184	0.0141119	0.0325663	0.0172186	0.0291082	0.005357	0.00769195	0.0195968	0.0167975	0.0368695	0.00984155	0.0185258	0.0271394	0.145405	0.021186	0.0283833	0.0233264
ATCTGTAATTGTACCC-1	0.0125243	0.00714093	0.00951359	0.00213946	0.0150435	0.0973405	0.0851086	0.0998904	0.0877396	0.0727048	0.00291765	0.015851	0.0189227	0.0338337	0.0378582	0.0100588	0.00844133	0.0283652	0.0582654	0.0238978	0.0186432	0.0317247	0.00690532	0.00826381	0.0107235	0.0146354	0.0302833	0.00955464	0.0194439	0.0229897	0.0422948	0.0202756	0.013914	0.0227905
ATCTTAGGGCATTAAT-1	0.0383554	0.00459074	0.00351462	0.00150521	0.0145333	0.0417765	0.155226	0.104762	0.0306702	0.0681814	0.00472676	0.0701003	0.0110466	0.00498088	0.0175325	0.0258951	0.000611218	0.0301996	0.0132511	0.000473998	0.00109259	0.00258085	0.00214411	0.0391623	0.00736171	0.016422	0.149287	0.00425395	0.00494731	0.0684046	0.00968723	0.0137655	0.0192535	0.0197033
ATCTTATCGCACACCC-1	0.0077289	0.00246663	0.00155293	0.000450295	0.00893251	0.0605498	0.102609	0.0651925	0.216541	0.0334319	0.00258976	0.0476053	0.0120205	0.00600979	0.0488598	0.00587038	0.00514138	0.0280382	0.0130373	0.00482477	0.0323885	0.00879113	0.00576768	0.0252379	0.00809747	0.00819832	0.0719515	0.00957177	0.00857447	0.0398338	0.021693	0.0102131	0.0126513	0.0635773
ATCTTGACCTGCAACG-1	0.00755221	0.00804352	0.0236389	0.00422959	0.0260509	0.09176	0.135764	0.158966	0.0357127	0.0328508	0.00667156	0.0126468	0.011419	0.014679	0.0307722	0.0191383	0.00869606	0.0456543	0.00439804	0.0103065	0.0015496	0.0344339	0.00592493	0.011223	0.00967107	0.0439147	0.00940616	0.00601579	0.0219941	0.00403931	0.0675622	0.0609024	0.0147966	0.0196153
ATCTTGACTTGTCCAA-1	0.0424584	0.018409	0.0474613	0.00859036	0.030598	0.0839266	0.0985478	0.0978023	0.0315048	0.0523829	0.00387067	0.0124625	0.0239949	0.0300828	0.0344379	0.0252194	0.0159145	0.0375923	0.012699	0.01915	0.0243929	0.0420035	0.0085184	0.0110612	0.0078355	0.030147	0.0148747	0.00764853	0.0137837	0.0108184	0.0521347	0.0127473	0.00896727	0.0279614
ATGAAGCCAAGGAGCC-1	0.00106612	0.0130533	0.0237578	0.00249795	0.0213344	0.124997	0.120718	0.164128	0.041979	0.0300642	0.00659006	0.00272723	0.00670257	0.012263	0.0434017	0.00306858	0.0430822	0.009931	0.024293	0.0461625	0.00767299	0.0304607	0.00837738	0.00766142	0.0108248	0.0318948	0.00756465	0.0105576	0.0230588	0.00477549	0.0568045	0.0211029	0.011036	0.0263897
ATGACGCCGGCTCTAA-1	0.00275579	0.00946665	0.0247902	0.00934665	0.0188461	0.121495	0.195331	0.211659	0.0248005	0.0688495	0.00091	0.00844965	0.00589603	0.00761084	0.020935	0.0314629	0.0113926	0.0278362	0.00944528	0.0117138	0.00192126	0.0131812	0.00421263	0.0115567	0.00290839	0.0500327	0.00714942	0.00447004	0.0135623	0.00294562	0.01643	0.0177378	0.0075723	0.0233272
ATGACGCGTTCTATCC-1	0.00301414	0.00966936	0.0444329	0.0108257	0.0144042	0.11149	0.109043	0.219139	0.0571177	0.024064	0.00149406	0.00263913	0.0032659	0.0228733	0.0152605	0.00506391	0.0107848	0.0179567	0.0075659	0.0414365	0.0111017	0.0415671	0.00452002	0.00570918	0.00716122	0.0454774	0.00355974	0.00574991	0.0427023	0.00225257	0.048802	0.0221128	0.0093735	0.0183698
ATGACTATCAGCTGTG-1	0.0170884	0.0362519	0.025303	0.00342406	0.0141182	0.10322	0.193174	0.235189	0.0144992	0.0304982	0.00056612	0.00919746	0.00269335	0.00876253	0.00862403	0.0366172	0.00620773	0.0267271	0.00448863	0.00543029	0.00219681	0.00837611	0.00468081	0.0128911	0.00232758	0.074049	0.0142991	0.00424181	0.0182622	0.00500457	0.0387217	0.0153309	0.0042171	0.0133196
ATGACTATGCGACATT-1	0.00938126	0.0146195	0.0470483	0.01217	0.0322813	0.117454	0.0552421	0.111993	0.0523966	0.0365408	0.0195995	0.00273244	0.0124395	0.0316959	0.0454573	0.0116479	0.0391136	0.0278713	0.0061798	0.0351687	0.0359514	0.0313317	0.00584005	0.00281464	0.0103558	0.0187906	0.00130646	0.00821683	0.0236343	0.00202665	0.0911915	0.0148399	0.00728565	0.025382
ATGAGGAGTGTTAATC-1	0.000973769	0.00345401	0.0132786	0.00484474	0.0243753	0.0976284	0.140154	0.114908	0.0579806	0.0338007	0.00874968	0.0493821	0.0277126	0.0100265	0.0522476	0.0205818	0.0120075	0.0417741	0.00502983	0.0199646	0.0186947	0.0146729	0.0112321	0.021423	0.00711384	0.0247832	0.018116	0.00979712	0.0183389	0.0129646	0.0235677	0.0192756	0.0103962	0.0507487
ATGATCGGGAATAGAC-1	0.00146267	0.0100562	0.0173976	0.00758304	0.0172536	0.100394	0.0996853	0.131962	0.0438694	0.045643	0.00649259	0.0109874	0.0190626	0.0302717	0.0619917	0.0159407	0.0251767	0.0292372	0.0530578	0.042276	0.0158341	0.0225093	0.00670087	0.00983472	0.0093953	0.0289369	0.00892636	0.00885415	0.0224172	0.00683077	0.0381515	0.0140343	0.0122513	0.0255222
ATGATGCAATGGTACA-1	0.00931332	0.0113419	0.0386567	0.0119862	0.0207635	0.101983	0.21807	0.204732	0.0162638	0.0881368	0.00415952	0.0262166	0.00669122	0.00342149	0.0112813	0.0475024	0.00278007	0.0248357	0.000894735	0.00240265	0.00076487	0.00253355	0.00338971	0.0223761	0.00149039	0.0403803	0.0142393	0.00274741	0.00897674	0.00703937	0.0166533	0.00840963	0.00342844	0.0161373
ATGCACGCGCTGTTCA-1	0.0308583	0.00244645	0.0225547	0.00175235	0.0338214	0.172195	0.033462	0.115901	0.0416275	0.118803	0.0132117	0.00470839	0.00768646	0.0333129	0.0357815	0.000201053	0.0458034	0.0064662	0.012145	0.0139655	0.00529332	0.065292	0.010311	0.00162809	0.00952046	0.00448969	0.00343194	0.0083591	0.0264953	0.00452958	0.0905759	0.00801132	0.009856	0.00550236
ATGCACTACCGCATTG-1	0.00139816	0.00431708	0.0154649	0.00643482	0.0204252	0.0919372	0.106075	0.0777776	0.0822317	0.0489187	0.0258608	0.0171503	0.0182926	0.00854862	0.0706405	0.017347	0.029325	0.091758	0.00584101	0.0495922	0.0203556	0.0140176	0.0138503	0.01945	0.00568984	0.0103582	0.00434776	0.00774662	0.0175579	0.00324495	0.0293131	0.0233388	0.00628913	0.0351041
ATGCATGATCCAGGAT-1	0.00548011	0.0137834	0.00819449	0.00166964	0.0337185	0.0454827	0.00712078	0.0324602	0.0696855	0.0173504	0.0230428	0.00555944	0.0103633	0.019587	0.0215368	0.0107624	0.0249103	0.0196844	0.0141117	0.0104715	0.00575314	0.0402048	0.00665673	0.0186527	0.0231409	0.00788829	0.134948	0.0161191	0.015227	0.103182	0.109275	0.0336949	0.0583873	0.0318957
ATGCATTCCGTGATGG-1	0.00769056	0.00587024	0.0186482	0.0105881	0.0187883	0.0165875	0.00309113	0.0116241	0.0166457	0.0169018	0.0201059	0.00996603	0.00263953	0.010711	0.0111499	0.00725085	0.00707095	0.0189124	0.0168679	0.0169653	0.00313786	0.0118674	0.00406964	0.0355958	0.0442572	0.0231115	0.217291	0.0191535	0.0168341	0.160602	0.0414818	0.0740817	0.0858434	0.0145977
ATGCCAATCGCTCTGC-1	0.028944	0.00524675	0.0205868	0.00711418	0.0369971	0.0688491	0.121075	0.102916	0.0502136	0.0876239	0.0115104	0.0336652	0.0284897	0.00667427	0.0427307	0.0193199	0.0125388	0.0462944	0.00554586	0.0219277	0.0143861	0.00825404	0.00976502	0.027317	0.00537352	0.0234291	0.0197432	0.00816317	0.0178704	0.0106515	0.0431988	0.0138651	0.0065779	0.033142
ATGCCATTTGCGACCA-1	0.0326978	0.0109656	0.0738955	0.01359	0.132312	0.0495799	0.0128359	0.044719	0.0324875	0.0173793	0.0206463	0.0161075	0.0152861	0.0152498	0.0244494	0.0400626	0.0167559	0.0110378	0.00734497	0.0126388	0.00407895	0.0430608	0.0131412	0.0142864	0.0195737	0.0250649	0.0582382	0.0115424	0.0278009	0.0314086	0.0830846	0.0284108	0.0213781	0.0188892
ATGCCGGTCTTGCATA-1	0.018143	0.0183441	0.0682616	0.0178262	0.0253892	0.0957425	0.0736514	0.125306	0.023026	0.0448638	0.0055752	0.00724585	0.00393154	0.0140214	0.0188308	0.0348638	0.0178772	0.0211126	0.00792799	0.020784	0.00339449	0.0421896	0.00654637	0.00326403	0.0098187	0.0608878	0.00211399	0.00749906	0.0261658	0.00167406	0.108741	0.0266275	0.0114263	0.0269271
ATGCCGGTTGATGGGA-1	0.0491774	0.00996525	0.0236497	0.00768776	0.16777	0.00951952	0.00124381	0.00567784	0.0187985	0.0115956	0.0190058	0.01263	0.00765251	0.00755535	0.0269886	0.0227454	0.00778215	0.0300733	0.0340233	0.00971602	0.00746687	0.0403045	0.00313871	0.0171922	0.019711	0.0108146	0.126368	0.00891862	0.01228	0.0822191	0.0816167	0.0436102	0.0381459	0.024956
ATGCGACAATTGGTCC-1	0.0292752	0.00334304	0.00481455	0.00156327	0.0140961	0.0622592	0.163336	0.132789	0.0236656	0.227712	0.0014643	0.029638	0.00530174	0.00201003	0.0139655	0.0393389	0.00243599	0.0329571	0.00262472	0.00218191	0.00132549	0.0032955	0.00355193	0.0181141	0.00152096	0.0336776	0.0145683	0.00268162	0.00578622	0.0114406	0.080073	0.0101518	0.00212303	0.0169173
ATGCGACAGTCCCATT-1	0.0179391	0.00364859	0.00596558	0.00255421	0.0149892	0.0658454	0.146619	0.137957	0.0504678	0.0837283	0.00303977	0.0313775	0.0100909	0.00406224	0.0362273	0.0233805	0.00226913	0.0542506	0.00426658	0.0175972	0.00323296	0.00440757	0.00254436	0.0251318	0.00687028	0.0199822	0.0836679	0.00544851	0.0137922	0.0455315	0.0131919	0.0147117	0.0123016	0.0329089
ATGCGAGTCCCACCAC-1	0.00930939	0.0101797	0.0287662	0.00269458	0.0147581	0.0805152	0.0607073	0.0761703	0.0976639	0.0712856	0.00166529	0.00548519	0.0072773	0.0211041	0.0507479	0.00237762	0.022254	0.0160416	0.0176408	0.0434317	0.0338941	0.0279975	0.00661482	0.00953323	0.0164402	0.0149584	0.0329243	0.0138076	0.0266671	0.0201568	0.0989519	0.0236483	0.0170129	0.0173171
ATGCTCAGTGTTGCAT-1	0.0215757	0.00334123	0.0172936	0.00230728	0.0178537	0.103382	0.0861821	0.101317	0.140754	0.0398003	0.00641242	0.00616869	0.00793018	0.015199	0.0422711	0.00839536	0.0174445	0.0281626	0.0134329	0.0189114	0.00769644	0.0223996	0.0130584	0.0102652	0.0153465	0.0119646	0.0331277	0.0168738	0.0207392	0.0269428	0.051231	0.0158265	0.0217283	0.0346645
ATGCTCTGGCGCGGTA-1	0.0290677	0.0116431	0.033893	0.00437284	0.0155437	0.104606	0.080341	0.103024	0.0578431	0.0474933	0.00738375	0.00809797	0.0185959	0.0191804	0.0176895	0.0121796	0.0247695	0.0096351	0.00995255	0.0307843	0.0124502	0.046059	0.00795999	0.00985347	0.017341	0.0324213	0.031873	0.0112007	0.0193439	0.0243306	0.0761047	0.0183031	0.0192658	0.0273973
ATGGAAATTTAAGGAG-1	0.203373	0.021383	0.0616291	0.0114036	0.00797941	0.0411344	0.0388704	0.0582893	0.0663191	0.017775	0.00147611	0.0378792	0.0016344	0.00613608	0.0125651	0.0555417	0.018445	0.0526803	0.0194804	0.00483712	0.00327006	0.0140729	0.00476543	0.00898474	0.00731704	0.0642881	0.0397833	0.00488572	0.0117929	0.0328944	0.0313146	0.00672594	0.00903413	0.0220385
ATGGACTGCTTAGTTG-1	0.00992669	0.00550574	0.00656369	0.0028609	0.0143641	0.0704156	0.0229166	0.0391573	0.0762816	0.0264692	0.0336434	0.018032	0.0218402	0.0158495	0.0445792	0.00469811	0.00736782	0.0401168	0.0217557	0.023317	0.00998432	0.0240511	0.0127992	0.0279106	0.0228495	0.00903944	0.117197	0.0153552	0.0195516	0.0783631	0.0388467	0.0245617	0.0495024	0.0443268
ATGGAGCAGGCCGTGA-1	0.00338626	0.00908915	0.0230498	0.00520672	0.0220878	0.142193	0.0694865	0.154992	0.115657	0.0184643	0.000821644	0.00188525	0.00442946	0.028996	0.0221294	0.0178806	0.0272888	0.0232037	0.0131512	0.0536836	0.0101946	0.0352914	0.00882003	0.00377631	0.0106402	0.0224459	0.00273964	0.0116133	0.023309	0.00390128	0.0495025	0.0132398	0.00866965	0.0387743
ATGGATCCGGCGTCCG-1	0.0479995	0.000624164	0.000489745	0.000575605	0.0882265	0.00366574	0.0008389	0.00217901	0.0424437	0.0647431	0.0537529	0.0314235	0.00361032	0.0143436	0.0191163	0.00491941	0.00514037	0.0235737	0.0214227	0.0037667	0.00381601	0.0112845	0.00441089	0.0250383	0.0183796	0.00441918	0.167098	0.0116439	0.00746873	0.117578	0.0942663	0.02952	0.0418357	0.0303854
ATGGATTGACCAAACG-1	0.00806947	0.0120792	0.067784	0.00751815	0.0206569	0.111522	0.152592	0.215782	0.0137026	0.0544353	0.00318144	0.0124998	0.0110299	0.00957274	0.00903235	0.0395639	0.00722146	0.019865	0.00531695	0.0114367	0.00329904	0.0309205	0.00271828	0.00531599	0.00256143	0.04709	0.00421297	0.00285136	0.0135025	0.00193104	0.0523201	0.0249462	0.00597587	0.00949257
ATGGCAGCATTACGAT-1	0.268327	0.0758867	0.114014	0.0194658	0.00182361	0.0136746	0.00140627	0.00811459	0.0166866	0.00148371	0.000296793	0.0149485	0.000922171	0.001368	0.00954191	0.11339	0.0040492	0.128616	0.0115867	0.00597309	0.00121831	0.01159	0.00268372	0.00111443	0.00256746	0.0931932	0.000415206	0.00165236	0.00928257	0.000372687	0.0502215	0.00651009	0.00194671	0.00565691
ATGGCAGCCGAGAAAC-1	0.113192	0.0236946	0.0798719	0.015679	0.0239975	0.0564963	0.112543	0.143422	0.0226114	0.0406289	0.000216578	0.0544705	0.00168346	0.00394604	0.0043031	0.101767	0.000980774	0.037432	0.00042798	0.000910602	0.000262669	0.00399683	0.00350091	0.0161161	0.00109949	0.0772686	0.0112605	0.000900163	0.00703452	0.00295624	0.0210045	0.00787582	0.00171064	0.00673777
ATGGCTGGAAATGGCC-1	0.139966	0.0236316	0.17208	0.0298861	0.0335294	0.0136521	0.00427075	0.00918514	0.0503477	0.0512293	0.00171105	0.053747	0.0019825	0.00452729	0.0101682	0.120984	0.00299826	0.0998529	0.00300117	0.00161571	0.00219057	0.00984062	0.00664785	0.00540001	0.00362708	0.0632524	0.00207807	0.00307522	0.00979012	0.00260357	0.0439256	0.00901683	0.00214188	0.00804384
ATGGGAACGGAAGCGG-1	0.0398208	0.0202928	0.0444285	0.00925936	0.0478572	0.0676774	0.116642	0.119627	0.023377	0.118387	0.00137415	0.0136675	0.00710636	0.010589	0.0071734	0.0302309	0.00409288	0.0354576	0.0036132	0.00864199	0.00106433	0.0105731	0.00298972	0.0127656	0.00580322	0.0322305	0.0289536	0.00433703	0.0111877	0.0266875	0.0857877	0.013917	0.0177959	0.0165908
ATGGGACCTGCTGAAC-1	0.00105928	0.00451166	0.0497629	0.00732108	0.0210644	0.117672	0.0469033	0.103607	0.0396038	0.0361115	0.00882386	0.00241532	0.011171	0.0511085	0.0616857	0.00283096	0.0295521	0.0108989	0.0402143	0.0375658	0.00617083	0.0328125	0.0140425	0.0044545	0.0193726	0.0182148	0.00499707	0.023704	0.0355438	0.00675308	0.0768172	0.0200513	0.0184893	0.0346927
ATGGGCCTCGGCCTCT-1	0.0268084	0.00875033	0.0394469	0.0112959	0.0286559	0.0770655	0.0849394	0.0987391	0.0334723	0.0581539	0.00611455	0.00634648	0.0435548	0.0239143	0.0466908	0.0246	0.0177302	0.0153027	0.00881772	0.0349939	0.0302279	0.0353128	0.00958226	0.00876425	0.00882013	0.0247413	0.00660635	0.0100552	0.0279873	0.00527477	0.0815928	0.0217866	0.0164459	0.0174095
ATGGGTGTATACCTCC-1	0.00643596	0.00411351	0.00593469	0.00727851	0.0243702	0.0221234	0.00410068	0.0154826	0.0210772	0.0152141	0.0218256	0.0109398	0.00312915	0.00958682	0.0134387	0.00913016	0.0050514	0.0208558	0.0139057	0.0125003	0.00194054	0.0163098	0.00443054	0.0278922	0.0351979	0.0166676	0.240721	0.0188285	0.020569	0.187468	0.045985	0.0453963	0.0640709	0.0280277
ATGGTATTGGGAACCG-1	0.00239525	0.00327617	0.0119806	0.0133981	0.0153707	0.0555746	0.0577042	0.064405	0.0315978	0.0379513	0.0119972	0.0308871	0.00824699	0.0246037	0.0327419	0.00895997	0.0167874	0.0331998	0.0133413	0.0261646	0.00476483	0.0335062	0.00955175	0.0209006	0.0213088	0.0203153	0.093793	0.018864	0.0269818	0.0616332	0.0741383	0.0389771	0.0489245	0.0257571
ATGGTATTTACTGATT-1	0.0126136	0.00359809	0.00343923	0.00156474	0.0143108	0.0515475	0.11999	0.0704165	0.0505422	0.0672276	0.00822003	0.0842167	0.0349224	0.0094855	0.0569239	0.0309291	0.00426794	0.087482	0.00308091	0.00266106	0.0198157	0.00585978	0.00891672	0.0410918	0.00543523	0.0139984	0.0557457	0.00713807	0.00745951	0.0335759	0.017084	0.0163729	0.0148482	0.0352176
ATGGTCGCGTGGTTTC-1	0.0938866	0.0292985	0.317647	0.0242205	0.00362427	0.0131707	0.00175771	0.00971666	0.0218622	0.00500691	0.00309747	0.0206452	0.00273365	0.0127143	0.00526953	0.128814	0.0074814	0.0792122	0.000705089	0.00292454	0.00176814	0.0118034	0.00388685	0.00132104	0.00183623	0.111546	0.000182467	0.0012876	0.00787814	0.000226399	0.062424	0.0047971	0.00130356	0.00595068
ATGGTGCTCAAAGCCA-1	0.0962611	0.000118319	0.000141742	0.000185362	0.00295306	0.0022522	0.00155491	0.00125139	0.0436283	0.233906	0.0141786	0.143689	0.0113846	0.00877518	0.00649579	0.0150348	0.00240766	0.038581	0.0120457	0.000843729	0.00253847	0.00647162	0.00326951	0.031665	0.00926951	0.00246052	0.10388	0.00592064	0.00199063	0.0559862	0.078903	0.0175896	0.0191942	0.0251732
ATGGTTACGAAACATG-1	0.0408562	0.00117035	0.00262386	0.000681748	0.0114252	0.0428918	0.181817	0.0785532	0.0292546	0.189032	0.00520526	0.0631126	0.0199912	0.00607872	0.0362885	0.0219767	0.00344767	0.0374823	0.00146042	0.00485422	0.0126969	0.0062905	0.00922198	0.0341672	0.00179918	0.0154222	0.0102593	0.00335227	0.00419113	0.00665144	0.0633038	0.018377	0.00210504	0.0339594
ATGTAAGGCTGCTCTT-1	0.0149815	0.0186467	0.0377513	0.00985008	0.0247049	0.0958849	0.150599	0.138003	0.0158053	0.0267684	0.00357331	0.00863865	0.00975209	0.0321213	0.0256788	0.017442	0.0307593	0.0196512	0.00719696	0.0247147	0.0115511	0.023887	0.00761475	0.014176	0.011623	0.0267123	0.0337059	0.00703479	0.0172086	0.0190709	0.0396968	0.0255683	0.0213848	0.028242
ATGTACATGCGGTGAG-1	0.00301287	0.003993	0.0376167	0.00297029	0.0275444	0.103264	0.0333963	0.078149	0.10529	0.0279147	0.00342439	0.00245274	0.00664586	0.0183264	0.0406854	0.00851068	0.0227254	0.0156404	0.0485288	0.0527902	0.0177776	0.0320469	0.0104031	0.00212023	0.0149294	0.0087421	0.00109615	0.0104829	0.0488691	0.00233955	0.0828497	0.026381	0.00878215	0.0902982
ATGTACGATGACGTCG-1	0.00428668	0.00722418	0.0101541	0.00198542	0.0160518	0.0794987	0.0310623	0.0610106	0.169277	0.0209985	0.0123594	0.00685261	0.0288448	0.0297938	0.0314932	0.00244634	0.0290878	0.0295149	0.0641303	0.0285803	0.0217698	0.0418546	0.0143981	0.00744637	0.0163328	0.00713611	0.033317	0.0139716	0.0197661	0.0332568	0.0492377	0.0144201	0.0200658	0.0423749
ATGTAGCGCGCGTAGG-1	0.00487073	0.00554236	0.0177104	0.00190382	0.019027	0.0968635	0.0733512	0.0743624	0.134542	0.0289851	0.0050161	0.00986755	0.0334151	0.0562441	0.0423445	0.00173956	0.0241934	0.0483646	0.035281	0.0171467	0.0243631	0.0381488	0.0107388	0.00476048	0.0134548	0.0125253	0.00454904	0.0131194	0.0218055	0.00617888	0.0549871	0.0189234	0.009977	0.0356976
ATGTCATAATAAACGA-1	0.0168768	0.00474098	0.00760879	0.00192755	0.0188719	0.0796443	0.186682	0.129541	0.0280664	0.052436	0.00377598	0.0388976	0.00530579	0.0134027	0.0183191	0.0217526	0.00297409	0.0340453	0.00869672	0.0026905	0.0068214	0.0104858	0.0075186	0.0261467	0.0105185	0.0313437	0.0785259	0.0081084	0.0152828	0.0470474	0.0206468	0.0173713	0.0245798	0.019347
ATGTCTTGTTTGACTC-1	0.00603915	0.00627892	0.00398931	0.00340488	0.0210018	0.0262594	0.019181	0.0175472	0.0393989	0.0224729	0.0206252	0.031145	0.0140759	0.0154824	0.0368647	0.00918293	0.00843591	0.037005	0.0336733	0.0104144	0.00952182	0.0213795	0.00643667	0.0367525	0.0283673	0.00786625	0.180119	0.0164449	0.0159737	0.124015	0.0302784	0.0354651	0.0642304	0.0406721
ATGTGAAAGCCTAATG-1	0.0303579	0.00419072	0.0126266	0.000929635	0.0153596	0.0971772	0.0285542	0.0641591	0.145055	0.0718062	0.00381178	0.00438982	0.0195844	0.058866	0.0334205	0.0017323	0.0265141	0.0320959	0.0322451	0.0219932	0.0127381	0.0401411	0.00997557	0.0079519	0.017433	0.00666168	0.00602197	0.0136454	0.0229449	0.0107339	0.0881953	0.0128594	0.0146492	0.0311796
ATGTGCATCCGACGCA-1	0.00332172	0.0158332	0.0866149	0.00954936	0.0381294	0.109791	0.12822	0.233142	0.0231226	0.0443129	0.00164521	0.00473786	0.00508153	0.0118836	0.0117959	0.0343873	0.0121208	0.0190576	0.00214622	0.0167569	0.00361559	0.0251966	0.0019504	0.00486822	0.00336101	0.0595039	0.00395021	0.00277758	0.0137256	0.00178645	0.0370886	0.0113119	0.00503719	0.0141774
ATGTGGACATCTTGAT-1	0.00686552	0.0269515	0.0316233	0.00779555	0.0228012	0.0973061	0.0117405	0.071953	0.14927	0.00827617	0.00291253	0.00172479	0.0227789	0.0318047	0.0301008	0.00343403	0.0181996	0.0340466	0.0273625	0.0396933	0.00916507	0.0729151	0.0123231	0.00136486	0.0172807	0.0192093	0.00177106	0.0127969	0.0489321	0.00393553	0.0841587	0.0186321	0.0123433	0.0385313
ATGTGTAGTTTAGTCA-1	0.208022	0.0396164	0.19601	0.0244058	0.0110165	0.0254903	0.00309319	0.0156579	0.0382558	0.00383068	0.000866478	0.0178314	0.000624657	0.0049176	0.00992925	0.0789777	0.0114484	0.0755746	0.00281578	0.0136184	0.00313912	0.0111444	0.0030944	0.00209098	0.00464206	0.111699	0.000844796	0.00279395	0.00990329	0.00129247	0.0457445	0.00728969	0.00370296	0.0106153
ATGTTACGAGCAATAC-1	0.0122151	0.00295061	0.00234743	0.00276803	0.0128618	0.0305479	0.0349317	0.0396976	0.0227574	0.0392184	0.0118782	0.0352902	0.0137995	0.030431	0.0166146	0.0062583	0.00387193	0.0276202	0.0183003	0.00278162	0.00457846	0.0188425	0.0101794	0.0320767	0.0320552	0.0228734	0.172839	0.0173616	0.0195515	0.114419	0.032392	0.0540885	0.0655497	0.0360516
ATGTTCGTCGACCCAC-1	0.0304076	0.00668551	0.0194428	0.0131847	0.0358811	0.0872081	0.149982	0.167037	0.0279974	0.0471775	0.000713251	0.0452495	0.013179	0.0171399	0.0327813	0.0117137	0.0039952	0.0847309	0.00704703	0.00912498	0.00178043	0.0167201	0.00341012	0.0132083	0.00372932	0.035858	0.0123366	0.00395868	0.0206386	0.00747229	0.0322898	0.0165011	0.00641813	0.0149998
ATGTTGATTAGAGACT-1	0.0398259	0.00728157	0.0105107	0.00433306	0.0122855	0.0814541	0.13667	0.115849	0.0862857	0.0504801	0.00678086	0.024359	0.00913822	0.00755293	0.0679759	0.0196784	0.0055676	0.0643314	0.00703136	0.00879888	0.00629743	0.0149799	0.0103751	0.0201386	0.00373469	0.0129006	0.0121459	0.00585827	0.017761	0.00743595	0.0180374	0.00615172	0.0037226	0.0942707
ATGTTGTAGTCTGTTT-1	0.0109658	0.0103258	0.0133362	0.0128187	0.0116985	0.0538336	0.0592127	0.0783283	0.0317527	0.0276424	0.0172588	0.012852	0.00276104	0.0250253	0.0183659	0.00868889	0.0116777	0.0115341	0.0179014	0.018075	0.00203944	0.019392	0.00434626	0.0254127	0.0275748	0.018499	0.146056	0.0135678	0.0270917	0.0829929	0.040104	0.0290862	0.0678609	0.0419217
ATGTTTGTAAGATCAT-1	0.0517658	0.00536156	0.0146932	0.00421496	0.0747259	0.0503479	0.0968311	0.0801464	0.0455433	0.0783198	0.0142148	0.0266643	0.022825	0.00504249	0.0238613	0.0387917	0.00802397	0.0535276	0.00414519	0.00442486	0.00400546	0.0173112	0.00542829	0.0216806	0.0108198	0.0202619	0.0518677	0.00737865	0.0138754	0.0304831	0.0472007	0.0213082	0.0133186	0.0315894
ATTAAACATGCGGACC-1	0.00254002	0.0132299	0.0608469	0.00273986	0.0154914	0.0681258	0.0102391	0.0633612	0.0803355	0.0109871	0.00622614	0.00307009	0.0054796	0.0207492	0.0475084	0.00791937	0.0292795	0.0224868	0.027945	0.0598084	0.0147604	0.0504249	0.00887964	0.00781635	0.0201035	0.0195003	0.0528891	0.0162593	0.049918	0.0463243	0.053501	0.0418156	0.027025	0.0324136
ATTAATACTACGCGGG-1	0.0103526	0.00998931	0.0354432	0.00398972	0.0752517	0.0880283	0.0902547	0.149164	0.0638578	0.0669657	0.00162972	0.008881	0.0053598	0.0144007	0.0200531	0.0165732	0.0174717	0.0137404	0.00692669	0.0148342	0.00361711	0.0301545	0.00682042	0.00587677	0.00791963	0.0265143	0.00570505	0.00749882	0.0306485	0.00498653	0.0952741	0.0285319	0.0103992	0.0228859
ATTAATGAACCAGTCG-1	0.0416772	0.00882589	0.0316074	0.00735549	0.0794444	0.0723688	0.0603005	0.0705143	0.0884826	0.0798026	0.0124053	0.00837865	0.0108979	0.0271864	0.0387846	0.015082	0.012949	0.0233247	0.00987153	0.0222732	0.00698806	0.0429425	0.00841547	0.00575126	0.011834	0.027566	0.00463757	0.00980307	0.0163595	0.00551531	0.0954193	0.0146185	0.00732608	0.0212909
ATTAATTCGGTCACTC-1	0.117479	0.0331272	0.168516	0.0227137	0.0188773	0.0653471	0.0141427	0.0536487	0.0239997	0.0126999	0.00305049	0.00925298	0.00372766	0.0128188	0.0202856	0.0727407	0.0151431	0.0439618	0.00354553	0.0187963	0.00585403	0.02404	0.00452828	0.00228706	0.00705037	0.10974	0.000850305	0.00440382	0.0204811	0.00102479	0.0624563	0.011108	0.00438199	0.00792023
ATTACAACTACCGGCC-1	0.0274279	0.000368169	0.000114241	0.000881329	0.132627	0.00137049	0.000275504	0.000811978	0.0158002	0.0204508	0.0196315	0.0279187	0.000922469	0.0026105	0.0115103	0.00838447	0.00132788	0.0163794	0.0182589	0.000701481	0.00156806	0.0118665	0.00213201	0.0354965	0.0229426	0.0063955	0.262932	0.0125933	0.00867383	0.155091	0.0595865	0.0441458	0.0529855	0.0158183
ATTACATGTCAGTCTT-1	0.0131055	0.0131834	0.0337685	0.00517359	0.0134756	0.0727997	0.0151343	0.0545902	0.120159	0.0331497	0.00913579	0.0061136	0.0177732	0.0179174	0.0548879	0.00142529	0.0119756	0.00893146	0.0134597	0.0316231	0.0104984	0.049688	0.0142945	0.0124096	0.0258785	0.0125943	0.0738522	0.0209787	0.0379526	0.0603369	0.0579932	0.0275625	0.0251675	0.0230109
ATTACGCGCTGGCAGG-1	0.0254863	0.00253838	0.00333251	0.00153387	0.00818849	0.0469943	0.101002	0.0734722	0.0511071	0.039507	0.00397557	0.0718061	0.0111036	0.0113851	0.0214591	0.0102228	0.00184042	0.0406748	0.0086516	0.00615841	0.00458921	0.00692043	0.00310123	0.0288575	0.0147233	0.0117671	0.173235	0.00744065	0.00799016	0.0951116	0.00861799	0.0252566	0.0314784	0.0404708
ATTACTAGCCTCTTGC-1	0.00454601	0.00397169	0.0122089	0.00857793	0.0155445	0.0349197	0.00742906	0.0271658	0.031135	0.0231911	0.01494	0.00782883	0.00398517	0.015327	0.0163899	0.00262132	0.012175	0.0135194	0.0272302	0.0299846	0.0134656	0.0330469	0.00708358	0.0334312	0.0431943	0.0147121	0.191631	0.0202262	0.0180382	0.115372	0.0458671	0.0506559	0.0722566	0.0283284
ATTACTTACTGGGCAT-1	0.00110955	0.0030764	0.0167234	0.0193925	0.0184673	0.0504929	0.125721	0.0299618	0.0306734	0.0625148	0.0186734	0.0469883	0.0502231	0.0106729	0.0840799	0.0353878	0.0101935	0.0803262	0.00299651	0.0243447	0.0363211	0.0135498	0.0178647	0.0333707	0.00294184	0.00340497	0.00629723	0.00993817	0.0107322	0.00498635	0.032911	0.0230964	0.00533245	0.0772336
ATTAGATTCCTCAGCA-1	0.0348847	0.00562227	0.0162525	0.0030172	0.0191304	0.0485301	0.128479	0.0817813	0.0147212	0.123141	0.0044662	0.0485009	0.0116451	0.00358416	0.0355452	0.040837	0.0033185	0.0366323	0.00604013	0.0028938	0.0115069	0.00744449	0.00530121	0.0303356	0.00853984	0.038564	0.0647621	0.00621989	0.00848332	0.0365784	0.0417787	0.0206682	0.0229064	0.0278874
ATTAGATTGATAGCGG-1	0.00525856	0.00270327	0.00872771	0.00598241	0.0226441	0.0252493	0.00331949	0.0160273	0.0324242	0.0106317	0.0315872	0.0130017	0.00834894	0.0114727	0.0104367	0.00205501	0.0172874	0.0448753	0.0229965	0.0131485	0.00564549	0.0462925	0.00647922	0.0247678	0.0430553	0.0176249	0.174144	0.019384	0.0298135	0.121571	0.0615436	0.045154	0.0755361	0.0208107
ATTAGGCGATGCTTTC-1	0.0204336	0.0063971	0.011249	0.00730178	0.0156078	0.0793766	0.175559	0.120722	0.0894804	0.0736165	0.0026627	0.032856	0.00464267	0.00440129	0.0398769	0.0229289	0.00353133	0.0293278	0.0175221	0.00769426	0.00562786	0.00653432	0.00447478	0.0135344	0.00757159	0.0225152	0.0476383	0.00720638	0.0154764	0.0367244	0.0132464	0.00845203	0.0104993	0.035311
ATTATACTTTGCTCGT-1	0.0466565	0.0018317	0.00477921	0.00150315	0.14966	0.0195288	0.00227376	0.0110052	0.0550086	0.037671	0.0111216	0.0141577	0.00324232	0.0264496	0.0267756	0.00248211	0.0176366	0.0134387	0.030975	0.0296666	0.0104613	0.0331931	0.00972932	0.0116286	0.0220257	0.00379918	0.0598657	0.0155298	0.0188474	0.0440303	0.174686	0.0245012	0.0296486	0.0361905
ATTATAGCTACTTTAC-1	0.0470025	0.0130792	0.0262949	0.00474415	0.035207	0.0940664	0.0867071	0.110534	0.0748675	0.0514308	0.00435646	0.00454942	0.00558095	0.0244963	0.0188665	0.0115912	0.0267559	0.0151789	0.00840262	0.0172632	0.0133246	0.0482502	0.00698063	0.00523349	0.0140714	0.0223895	0.00593433	0.0119012	0.0242582	0.00530389	0.0818427	0.010897	0.0387072	0.0299303
ATTATCGGAATGTACG-1	0.0107326	0.00363042	0.00282683	0.00165416	0.00888767	0.0514258	0.111938	0.0655523	0.05655	0.0645404	0.00625601	0.052154	0.0192388	0.0150456	0.0767245	0.0106753	0.0100662	0.0575672	0.0398343	0.016555	0.0309878	0.00833547	0.00991692	0.0357431	0.00850378	0.00922137	0.0698979	0.0118142	0.0108264	0.0418345	0.014672	0.0153032	0.0128895	0.0381994
ATTATCTCGACAGATC-1	0.0332619	0.011343	0.0322076	0.00661207	0.0239159	0.0862992	0.214771	0.149066	0.0155444	0.100846	0.00128543	0.0264368	0.00407054	0.00552146	0.0120129	0.0431413	0.00404763	0.022209	0.00330007	0.0176347	0.0014101	0.00916552	0.00354235	0.0133593	0.00261575	0.046063	0.00963723	0.00316007	0.0123356	0.00431003	0.0413966	0.0185971	0.00640124	0.0144788
ATTATGAGACCCAATT-1	0.10788	0.027253	0.172798	0.0284222	0.00969586	0.0200678	0.0151383	0.0181892	0.0425504	0.0740378	0.00117921	0.0635195	0.0119812	0.00263341	0.00431639	0.0944114	0.00276535	0.0619643	0.00212952	0.00108737	0.00159355	0.00656708	0.00463752	0.00773745	0.00298655	0.134361	0.00447861	0.00181782	0.00712206	0.00291049	0.0449742	0.00833897	0.00193926	0.00851438
ATTATGCCATAGGGAG-1	0.00663974	0.0125385	0.0686826	0.00726834	0.0779724	0.10421	0.0935663	0.181016	0.0254843	0.0549339	0.00519287	0.00640146	0.00733405	0.0192773	0.0124861	0.0200067	0.0138765	0.0248407	0.0048386	0.0339236	0.00218126	0.0269978	0.00418608	0.00505431	0.007017	0.035058	0.00406416	0.00851539	0.0218145	0.00288942	0.0620551	0.0164684	0.00713887	0.0160706
ATTATTATGTCCGTCA-1	0.00920707	0.00843585	0.0344741	0.00334925	0.0257935	0.113083	0.167458	0.195867	0.0319088	0.0547736	0.00321493	0.00771091	0.0189078	0.00829031	0.00969513	0.0505004	0.00780256	0.0179645	0.00683007	0.0152688	0.00491506	0.0254337	0.00580562	0.0109534	0.00488356	0.0385979	0.0080943	0.00422267	0.0235261	0.00389865	0.0453015	0.0168364	0.00575976	0.0112358
ATTATTCAGAGTCACT-1	0.0291214	0.00180291	0.00264965	0.000582088	0.00520809	0.068907	0.067069	0.0413767	0.0912849	0.0795369	0.00411124	0.0409127	0.0110252	0.00489244	0.0765803	0.0127085	0.00804643	0.0274191	0.0132831	0.0114542	0.0405501	0.017155	0.0151135	0.0387037	0.00825878	0.00432289	0.0503201	0.0176028	0.0132688	0.0348407	0.0130842	0.00663189	0.00863564	0.13354
ATTCAACCATTTAAGG-1	0.00240288	0.00474357	0.028355	0.00238668	0.00865176	0.0765465	0.0468129	0.0362171	0.0514936	0.0254618	0.0264517	0.0238946	0.0413968	0.0237193	0.0861781	0.0119472	0.0341017	0.0947712	0.0159101	0.0497223	0.0495606	0.0218486	0.0182095	0.0222562	0.0100943	0.00595197	0.00449891	0.0139037	0.0190392	0.0046178	0.0576324	0.0138948	0.00977221	0.0575549
ATTCACTGATGTTGGA-1	0.00459349	0.00829236	0.0162936	0.00272442	0.0156531	0.129481	0.154023	0.178985	0.0347677	0.0590694	0.0111433	0.00857731	0.0195665	0.0164466	0.0451788	0.0198953	0.00796529	0.0148153	0.011328	0.026537	0.00907712	0.0214938	0.00629183	0.0077114	0.00582193	0.0408864	0.00790178	0.00780573	0.0231213	0.00503421	0.0342171	0.0104696	0.00561666	0.0292147
ATTCAGATGAATCCCT-1	0.0294015	0.00363274	0.00776513	0.0028526	0.071744	0.0464361	0.108959	0.0795349	0.0678119	0.122111	0.00791862	0.0461369	0.0179303	0.0037896	0.0187171	0.0230146	0.00483853	0.06085	0.00325258	0.00398794	0.00615666	0.011516	0.00495355	0.0168203	0.00525061	0.017268	0.0416497	0.00666248	0.00766268	0.0333758	0.0496166	0.0277893	0.0126312	0.0279618
ATTCAGGACCTATTTC-1	0.0152835	0.00444592	0.0115017	0.00299895	0.0175922	0.0589405	0.0855539	0.0821193	0.100177	0.0820608	0.0130923	0.026144	0.0195796	0.00688747	0.0341818	0.015949	0.0108807	0.0612684	0.00901519	0.0091903	0.00460299	0.0146309	0.00990903	0.024923	0.00992294	0.0117703	0.0568931	0.00724051	0.0118248	0.0393982	0.0579168	0.0233187	0.0175737	0.0432119
ATTCAGGATCGCCTCT-1	0.0101559	0.00495595	0.0101103	0.00339856	0.0140317	0.0399924	0.0686449	0.0203564	0.066078	0.0698003	0.00975586	0.0959821	0.0608571	0.009134	0.0449267	0.0184306	0.0128424	0.0958679	0.00348142	0.0189593	0.0206239	0.0148385	0.0154862	0.042651	0.00737893	0.00262831	0.0372527	0.0140683	0.0122534	0.0274244	0.0507488	0.0101196	0.0179591	0.048805
ATTCAGTAGCAGGGTC-1	0.00208341	0.00409463	0.0285458	0.00346736	0.0213794	0.087928	0.0323293	0.0654786	0.0426809	0.0301677	0.00813587	0.00642341	0.0689031	0.0441018	0.0265761	0.0119495	0.0231545	0.0365896	0.0130373	0.037422	0.0273912	0.0458304	0.00647188	0.0108416	0.0264868	0.0138064	0.0371733	0.0179961	0.0382121	0.0365149	0.0696894	0.0203167	0.0218371	0.0329839
ATTCATATACTGTCCA-1	0.00261576	0.00538181	0.0162502	0.015388	0.00936702	0.041126	0.0142825	0.0250044	0.038884	0.0139493	0.0274782	0.0471945	0.0471149	0.0348425	0.0996015	0.0134732	0.0206406	0.0330055	0.00668794	0.0218991	0.00560653	0.0685529	0.0103655	0.0216427	0.0208825	0.0154628	0.0630507	0.0186479	0.0336312	0.057153	0.072329	0.0243018	0.027498	0.0266885
ATTCATCGTTGAGGCA-1	0.0765503	0.0383752	0.0968355	0.0404288	0.00847325	0.0421579	0.0659708	0.0601316	0.0237972	0.0269556	0.00156304	0.0479472	0.00638439	0.0046682	0.0187256	0.102522	0.00485564	0.0721018	0.00565616	0.00231887	0.00245615	0.0171532	0.00395097	0.0126578	0.00429355	0.103756	0.0195933	0.00258387	0.0098438	0.00838691	0.032213	0.00895742	0.00998748	0.0177471
ATTCCCACATAAACAA-1	0.0142685	0.00757513	0.017217	0.00597049	0.025345	0.052249	0.0219828	0.0366718	0.0464467	0.0432419	0.0546894	0.0132701	0.0412733	0.0337932	0.0316342	0.00991609	0.020803	0.0138163	0.0129905	0.0194209	0.00564283	0.0424872	0.00604731	0.0216757	0.022118	0.0101151	0.0931832	0.0164051	0.0201668	0.0746271	0.0665933	0.0202482	0.0454297	0.0326849
ATTCCTAAGACGTGGA-1	0.0146577	0.00440693	0.0107386	0.00369227	0.0215018	0.0614548	0.157943	0.101593	0.048885	0.0636155	0.0162783	0.034577	0.0507874	0.0114748	0.0483554	0.0196685	0.00839805	0.0402134	0.0167363	0.0354225	0.0100803	0.00879084	0.00500933	0.0230332	0.00617492	0.0239583	0.0250913	0.00672394	0.013871	0.0131362	0.0433235	0.0144119	0.00733359	0.028661
ATTCCTCCGCCAGTGC-1	0.014118	0.0175001	0.0384501	0.00312524	0.0186115	0.0788277	0.0802861	0.094184	0.0315147	0.0528826	0.01327	0.0101397	0.0521329	0.0594337	0.0760877	0.00867668	0.0320954	0.0180966	0.00868217	0.0237286	0.018464	0.0337188	0.01253	0.00839891	0.0103014	0.0111257	0.00331412	0.0144681	0.0282529	0.00390867	0.0610976	0.0132628	0.0084438	0.0408696
ATTCCTTCCAGGCGGT-1	0.207201	0.0373986	0.0954982	0.0221224	0.00410145	0.0155989	0.00211195	0.00792739	0.0398893	0.004734	0.00263037	0.0456709	0.00400312	0.00266226	0.0145677	0.0775442	0.00449737	0.0465725	0.0102655	0.00461555	0.00119999	0.0188575	0.00584375	0.0171839	0.0135557	0.0438696	0.0935538	0.00816792	0.00875188	0.0575751	0.0263275	0.0136622	0.0221043	0.0197341
ATTCGACGCCGGGCCT-1	0.0354245	0.00301716	0.00446577	0.00152512	0.0314002	0.103567	0.151783	0.17017	0.0579559	0.0426662	0.00254138	0.0197657	0.00413819	0.00467308	0.0278649	0.00920307	0.0041376	0.0316335	0.0194783	0.0032815	0.00220789	0.0159178	0.00493123	0.0179705	0.0102794	0.0139084	0.0797503	0.00625128	0.0106993	0.0343133	0.0128619	0.011083	0.0155885	0.0355446
ATTCGCGCCTTGAGAG-1	0.0019512	0.00460111	0.00742993	0.00133805	0.0111419	0.109397	0.042155	0.0688755	0.232919	0.0186668	0.00164669	0.00146065	0.0106842	0.017477	0.0598913	0.00306279	0.022979	0.0183299	0.0301441	0.0272339	0.0387685	0.0373531	0.0160887	0.00618474	0.021592	0.00766535	0.00375499	0.0259849	0.0278047	0.00884723	0.0341503	0.00984371	0.00984356	0.0607335
ATTCGTGCTATCTCTT-1	0.00792435	0.00980428	0.0210337	0.00415669	0.0172531	0.111311	0.0295922	0.0587786	0.116068	0.0278131	0.00901283	0.011084	0.0217684	0.0243201	0.0764633	0.00275504	0.0117677	0.0384557	0.0707904	0.0396536	0.0334195	0.0335614	0.0107424	0.00456087	0.013019	0.00857976	0.00247839	0.0149551	0.0436967	0.00719688	0.0691463	0.00905746	0.010433	0.0293481
ATTCGTGTACCCATTC-1	0.0786723	0.0102025	0.0385404	0.00549477	0.0205853	0.0800124	0.0704295	0.0745217	0.0759967	0.0353335	0.00121186	0.0249909	0.0060452	0.00833882	0.0317162	0.0258169	0.014435	0.0376269	0.0240916	0.00622712	0.0152627	0.0109281	0.00614664	0.0061059	0.0103272	0.033075	0.00744818	0.00667068	0.0143528	0.00500146	0.0434123	0.00934361	0.00671289	0.154923
ATTCTCGTCTCTTTAG-1	0.0314317	0.00365384	0.00974123	0.00655005	0.00972832	0.052175	0.0938109	0.0444441	0.0437429	0.107284	0.0151811	0.0522095	0.0524466	0.0556605	0.0460528	0.00891785	0.011163	0.0531201	0.011543	0.0249901	0.0126394	0.0153178	0.0129643	0.0287755	0.00622315	0.00521735	0.0144257	0.0101593	0.0141652	0.0131827	0.0741838	0.00737967	0.00904726	0.0424722
ATTCTGAGTATGAACT-1	0.0458916	0.00347308	0.005894	0.00234856	0.0232837	0.0364947	0.00867419	0.0225262	0.0562407	0.0832168	0.0193604	0.0114783	0.00491552	0.02899	0.030388	0.00546611	0.0112636	0.0312489	0.0211091	0.0148046	0.013316	0.0347596	0.008358	0.0216191	0.0245174	0.0104542	0.116836	0.0160931	0.0187486	0.0911468	0.0614401	0.0347693	0.0479059	0.0329684
ATTCTTCGTACTTATG-1	0.0346122	0.00674433	0.0366813	0.00467902	0.0840137	0.0651428	0.0105055	0.0471976	0.0571046	0.0797948	0.00962177	0.00832132	0.0074578	0.0103154	0.0392774	0.00743503	0.0167083	0.0273628	0.0217627	0.0485878	0.00329926	0.0646072	0.00621189	0.00898643	0.0195176	0.0130705	0.0506801	0.0142304	0.02451	0.0307574	0.0863227	0.0189832	0.0225613	0.0129359
ATTGAAGATCTTAGTG-1	0.00235602	0.00461086	0.00701711	0.00134203	0.0159834	0.100054	0.180378	0.13897	0.0505012	0.0410556	0.00268611	0.0190106	0.0219453	0.00755784	0.0568174	0.015214	0.00825054	0.0454319	0.0307464	0.00934995	0.021111	0.0101453	0.00910115	0.0274978	0.00565708	0.0263434	0.0237861	0.00857363	0.0167468	0.0120317	0.0118755	0.0102655	0.00796113	0.0496253
ATTGACCGGCGATGAC-1	0.295756	0.0949878	0.123686	0.0270831	0.00180402	0.013646	0.00262068	0.00624732	0.0268525	0.0041937	0.00188678	0.0448017	0.00179813	0.0011816	0.0253687	0.117996	0.0083457	0.046768	0.000784898	0.00133218	0.00306974	0.00716739	0.0045415	0.00833006	0.00272028	0.0467153	0.000988265	0.00124907	0.00405879	0.000662724	0.0507634	0.00440404	0.0017575	0.0164302
ATTGACGTAACTCGGT-1	0.0174892	0.00470184	0.00710667	0.00202514	0.0146508	0.0533098	0.103425	0.0361045	0.0273134	0.0889345	0.0376395	0.0953832	0.0847322	0.0220026	0.0425013	0.0142444	0.0214695	0.0645679	0.00130476	0.0332093	0.0254006	0.0104543	0.0180309	0.0385318	0.00302184	0.00514216	0.00668958	0.009499	0.00728396	0.00439369	0.0422334	0.0128503	0.00474823	0.0396048
ATTGATAGCAACGAGA-1	0.247295	0.0274748	0.0882404	0.0202999	0.026964	0.0411373	0.0206073	0.0265805	0.0318884	0.0127197	0.00491458	0.0546887	0.00299585	0.00881052	0.00658604	0.0685387	0.00713054	0.0348977	0.0134247	0.00207816	0.00718354	0.00929441	0.0111502	0.0120662	0.0081964	0.0476621	0.0374719	0.00408092	0.00926475	0.0227678	0.0401602	0.0105082	0.0129403	0.0199803
ATTGATCACCACATTT-1	0.0497792	0.0014291	0.00164381	0.00165687	0.016446	0.0414403	0.0102304	0.0293002	0.0702262	0.112575	0.00596396	0.0358377	0.00777651	0.025285	0.0379923	0.00266163	0.0141875	0.0187947	0.0238112	0.00986186	0.0118772	0.0235455	0.00995562	0.0286519	0.0213629	0.00636834	0.131343	0.0163132	0.012282	0.0917537	0.0455679	0.019084	0.0377188	0.0272764
ATTGATGAGTCCTAAC-1	0.0152095	0.0197427	0.019481	0.00952051	0.00882194	0.0479669	0.0222032	0.0266538	0.0293925	0.0189972	0.0222527	0.0336404	0.0492899	0.0166682	0.0773335	0.00862594	0.00959011	0.0272938	0.0276218	0.0148212	0.00686008	0.0373731	0.0118321	0.0280186	0.0224361	0.0101088	0.112411	0.0165519	0.0307997	0.0811766	0.0502657	0.0335735	0.0345812	0.0188845
ATTGCCTATTAGACCG-1	0.00779871	0.00323279	0.0015856	0.00488688	0.0210261	0.00869457	0.0020301	0.00515429	0.0138519	0.0166251	0.0286969	0.0220676	0.00101022	0.00585163	0.00962759	0.0103405	0.00290028	0.0350238	0.0301622	0.00120018	0.000845899	0.00900583	0.00585114	0.0544339	0.0342538	0.0222742	0.255912	0.0189154	0.0149345	0.160941	0.0221514	0.0590656	0.095327	0.014321
ATTGCCTTTATGTTTG-1	0.0505392	0.0296393	0.0893786	0.0186108	0.0114504	0.0623932	0.0850487	0.100688	0.0452676	0.0374954	0.00311478	0.0298161	0.0046278	0.00574243	0.0203652	0.0816279	0.00381543	0.0667291	0.00262198	0.00542939	0.00206432	0.0180922	0.00493394	0.00814089	0.00467697	0.102921	0.00805575	0.00297959	0.0108109	0.00378045	0.0423869	0.0154556	0.0053404	0.0159592
ATTGCGATCAGTAACT-1	0.00309502	0.00723361	0.0193753	0.0161877	0.0163923	0.0792251	0.132237	0.133528	0.022996	0.0443729	0.0250569	0.0128744	0.00616147	0.0155795	0.0169085	0.0184346	0.0116711	0.0217862	0.0177577	0.00876693	0.00268624	0.0147964	0.00607689	0.0221258	0.0147061	0.0267843	0.0792809	0.0086972	0.0199596	0.0485577	0.0384933	0.0351276	0.0288683	0.0242
ATTGCTGCTCCTCCAT-1	0.158849	0.0417714	0.205658	0.0271365	0.00436772	0.0202177	0.00348162	0.0149208	0.0384757	0.00890825	0.000848349	0.0355576	0.000877478	0.00424104	0.00906213	0.135161	0.003027	0.0956401	0.00267877	0.000937077	0.00106195	0.00525377	0.0029942	0.00206225	0.00259627	0.114866	0.000596908	0.00128202	0.00730187	0.000410703	0.0365762	0.00433591	0.00117156	0.00767399
ATTGGATTACAGCGTA-1	0.0707352	0.0367406	0.190248	0.0246744	0.00414548	0.0437396	0.0089885	0.0335544	0.0236776	0.00315427	0.00149221	0.022399	0.0118597	0.00125385	0.0199033	0.128583	0.00438231	0.103503	0.00125293	0.00253623	0.00319113	0.00904205	0.00339176	0.00188401	0.00230035	0.180228	0.000348421	0.001935	0.0137338	0.000447568	0.0262749	0.0066053	0.00142433	0.0123705
ATTGGGAATATCTTGG-1	0.0172658	0.00892877	0.0203669	0.0112045	0.0159008	0.074229	0.0686154	0.0772719	0.0460414	0.0267005	0.0108089	0.0188826	0.023401	0.0234045	0.0232693	0.00427425	0.0111266	0.0291808	0.0231069	0.0177808	0.00402627	0.0193719	0.00527653	0.0187588	0.0260898	0.03845	0.0792911	0.0114637	0.0165091	0.0509093	0.0723159	0.0243888	0.04813	0.0332582
ATTGGGAGTTCTGTAA-1	0.0186736	0.0118168	0.0818955	0.00402293	0.0447119	0.100696	0.128143	0.189409	0.0119549	0.058834	0.00100679	0.00337728	0.00321129	0.0143154	0.0134664	0.0378883	0.0133705	0.0220743	0.00344142	0.0330538	0.00142626	0.0318854	0.00243586	0.00289022	0.00321336	0.0319219	0.00179869	0.00283553	0.0157025	0.000898667	0.0806931	0.012244	0.00357883	0.0131127
ATTGTACAACTCGGCT-1	0.0048192	0.00979142	0.00739136	0.00734492	0.0138707	0.0213538	0.0103045	0.014333	0.0201655	0.0133892	0.0192435	0.0124845	0.00956227	0.0110473	0.0822061	0.00494946	0.0100253	0.0597268	0.0261242	0.0238111	0.00521756	0.0338271	0.00574062	0.0258758	0.0291918	0.0102133	0.186268	0.01978	0.0251511	0.131652	0.0411908	0.0335073	0.0477217	0.0227183
ATTGTCGCAATACCTT-1	0.0170245	0.000379805	0.000269158	0.00121912	0.160454	0.00168805	0.000280342	0.00112393	0.0256785	0.00884517	0.0200556	0.00957201	0.000656095	0.0131643	0.00840962	0.00812379	0.00591595	0.0141475	0.0133455	0.00445776	0.0021267	0.0257141	0.00260852	0.0300246	0.0276815	0.00584957	0.24033	0.0116505	0.00832616	0.158859	0.0707579	0.0327667	0.0562029	0.0122906
ATTGTCTGTTTCATGT-1	0.0120459	0.00725634	0.00728908	0.0018614	0.0187615	0.0450096	0.00866334	0.027774	0.0879201	0.0528063	0.0127812	0.0111975	0.00327931	0.0103335	0.0223922	0.00492884	0.0165398	0.0144607	0.0305612	0.0196576	0.00716113	0.024756	0.0115256	0.0222879	0.0269348	0.00707623	0.151332	0.0226363	0.0251134	0.0985247	0.0808837	0.0217377	0.0501946	0.0343161
ATTGTGACTTCGCTGC-1	0.0123869	0.0169847	0.0558497	0.0118551	0.024709	0.0988474	0.155295	0.207475	0.0169981	0.0433433	0.000995394	0.00826851	0.00562501	0.00463961	0.00829637	0.0809232	0.00459113	0.0291048	0.00163243	0.0091707	0.00164694	0.0139118	0.00437854	0.0069429	0.00203937	0.0711431	0.00473737	0.00263897	0.0159868	0.00206415	0.0494874	0.0164497	0.00358859	0.00799277
ATTTAACTCGTATTAC-1	0.0246565	0.00586889	0.0250187	0.0068615	0.0213495	0.0775717	0.019894	0.0571934	0.0561685	0.0348963	0.00319146	0.00762052	0.0325286	0.045613	0.0481795	0.00469969	0.0186519	0.0201342	0.0214713	0.0355884	0.0136728	0.0420283	0.0146325	0.0109732	0.0185572	0.0110627	0.0511868	0.0178754	0.0388662	0.0471385	0.0901202	0.017486	0.0258517	0.033391
ATTTACAGTTTACTGG-1	0.00743791	0.00467243	0.0176419	0.00422294	0.0204051	0.111732	0.158119	0.140878	0.0197788	0.0467526	0.0195358	0.00587754	0.0199053	0.00455489	0.0511827	0.0377477	0.0204048	0.0427864	0.00297732	0.0424849	0.0217286	0.0140265	0.00696805	0.011327	0.00457983	0.0355754	0.00512395	0.00646552	0.0167066	0.00257735	0.0402135	0.0190416	0.00736928	0.0291986
ATTTACTAAGTCCATT-1	0.0119843	0.0107337	0.00948057	0.00370366	0.0157942	0.109092	0.0654301	0.0697096	0.0375167	0.0486709	0.00993754	0.0320484	0.0503091	0.0290446	0.0629355	0.0189695	0.0186133	0.0230123	0.0140829	0.0121817	0.0192855	0.0295474	0.0125144	0.0230199	0.0143598	0.00988417	0.0399939	0.0132381	0.0151074	0.0257279	0.0402291	0.0185126	0.0187585	0.0665702
ATTTATACTGGTAAAG-1	0.016876	0.00664895	0.0216054	0.00416795	0.0127282	0.0825639	0.0691524	0.0939231	0.146946	0.0584738	0.00355052	0.0263606	0.0143828	0.0183676	0.0456803	0.0208979	0.00741736	0.0288566	0.0120479	0.015292	0.0142435	0.0163612	0.0056765	0.0116427	0.0115266	0.02053	0.0406993	0.00803897	0.0171771	0.0270042	0.0520988	0.0128431	0.0109037	0.0453156
ATTTCATTATTTCGCG-1	0.0115551	0.000772654	0.000911445	0.00125196	0.119123	0.00331292	0.00056118	0.00228226	0.0173837	0.0175563	0.0302724	0.0163172	0.00371479	0.0085397	0.00805432	0.00623199	0.00365763	0.00902541	0.0127962	0.00494723	0.00225748	0.00984376	0.00329664	0.0302937	0.039622	0.0082595	0.205247	0.015024	0.0144401	0.137669	0.0911048	0.0731255	0.076553	0.0149958
ATTTCCGGGTTCTGCG-1	0.000601118	0.00350831	0.00761982	0.000570027	0.010194	0.114613	0.00836701	0.0878766	0.331557	0.00491596	0.00160452	0.000429813	0.00362954	0.0291182	0.0327898	0.00130589	0.0203377	0.00554542	0.0571368	0.0553559	0.0228663	0.0468149	0.00682517	0.000732935	0.0198647	0.00502197	0.000634894	0.0128166	0.025105	0.00345554	0.040217	0.00630291	0.00748442	0.0247813
ATTTGCCTAGTTACGA-1	0.361821	0.0401263	0.0938012	0.0239655	0.000648462	0.00497358	0.00125519	0.00384228	0.0333434	0.00669966	0.00162417	0.0682565	0.00178058	0.00756693	0.0103769	0.0971645	0.00163372	0.0784504	0.00416138	0.000605857	0.0031194	0.00991287	0.00277719	0.00362843	0.0018619	0.0568563	0.00148185	0.00132202	0.00519188	0.00129798	0.0479874	0.00602397	0.0012529	0.0151887
ATTTGCGCGAGTAGCT-1	0.00208873	0.0047975	0.0152626	0.00128259	0.0190724	0.11965	0.0810001	0.170693	0.0809379	0.0347335	0.00441599	0.00441083	0.00706725	0.0209672	0.0438497	0.00256391	0.0197646	0.0261814	0.0334178	0.0294518	0.0119111	0.0389513	0.00749495	0.00736571	0.0114754	0.0215374	0.00803701	0.0108514	0.0352847	0.008549	0.0632745	0.0118653	0.0168436	0.024949
ATTTGTCTTGGGAGCT-1	0.122517	0.0686034	0.249958	0.0283563	0.0227371	0.0419379	0.00685438	0.0307892	0.0219224	0.00260296	0.00262156	0.0121543	0.00533211	0.00850875	0.0267067	0.0936345	0.00625351	0.0432518	0.00136206	0.0257238	0.00270368	0.0239351	0.00209586	0.000733579	0.00320673	0.0639619	0.000155565	0.00167979	0.00826429	0.000179352	0.0481923	0.00461409	0.00206332	0.0163874
ATTTGTTCCAGGGCTC-1	0.0592733	0.0227757	0.115766	0.0199606	0.339246	0.00767561	0.00106291	0.00529711	0.0184091	0.00870289	0.00236594	0.0166205	0.00388951	0.00328207	0.00982207	0.0712634	0.00202592	0.0438065	0.001557	0.000876488	0.00747638	0.0212736	0.0023405	0.00121805	0.00580849	0.0798881	0.00022192	0.00254149	0.0255999	0.000344085	0.0620604	0.0246215	0.00351837	0.0094093
CAAACCATAAGCGTAT-1	0.0122427	0.0291402	0.0558177	0.0243911	0.0156046	0.137826	0.133321	0.239466	0.0200674	0.0464046	0.00129629	0.00482627	0.00343646	0.00913949	0.014501	0.0475944	0.00774694	0.0190829	0.000769393	0.00909562	0.00573697	0.0230016	0.00335872	0.00504671	0.00224847	0.036056	0.00406438	0.00251519	0.0169105	0.00157221	0.0379009	0.00848563	0.00283537	0.0184972
CAAACCCTCCGGCGGG-1	0.000998594	0.00432452	0.0291633	0.00232925	0.0168528	0.0953823	0.11105	0.110581	0.0613066	0.0382552	0.00446207	0.0105599	0.0367739	0.0206984	0.0281344	0.0155892	0.0124581	0.0493044	0.022408	0.0290456	0.0100442	0.0397634	0.00688501	0.00613713	0.0101848	0.0231403	0.00347322	0.0106158	0.0576943	0.00233103	0.050482	0.015197	0.00735642	0.0570179
CAAACGAGTATCGCAG-1	0.0129896	0.0113089	0.0138041	0.00555467	0.0140724	0.0905166	0.0950074	0.125044	0.0285488	0.0459449	0.00211915	0.0124548	0.0220017	0.0156513	0.0536982	0.00545931	0.013209	0.0531016	0.0192736	0.0145503	0.0129535	0.0291994	0.014863	0.0208688	0.0127575	0.0148017	0.0467335	0.0158193	0.0286148	0.0452607	0.0327175	0.0106261	0.0169197	0.0435542
CAAACGGTCGCACTTT-1	0.00902421	0.00706444	0.0152826	0.00291881	0.031683	0.103827	0.217432	0.171931	0.0432726	0.0402563	0.001402	0.0267026	0.0225708	0.00685094	0.0458111	0.0290198	0.0054244	0.0340391	0.00233632	0.0087603	0.012759	0.0111662	0.0035084	0.0108007	0.00231545	0.0176365	0.00578283	0.00329746	0.0115318	0.00332075	0.0471271	0.00668345	0.00425216	0.0342079
CAAACGTGGTCTTGCG-1	0.0210419	0.00732508	0.0139425	0.00265726	0.0266232	0.0920348	0.171789	0.156859	0.0267317	0.119445	0.00762675	0.0249719	0.0105078	0.00692723	0.02331	0.0247696	0.00409635	0.0380948	0.00209312	0.00698324	0.00313702	0.00692963	0.00487901	0.0209426	0.00302632	0.0285978	0.0192708	0.00408239	0.0104153	0.0124228	0.0528288	0.0184877	0.00492653	0.0222237
CAAACTACGATAGAGA-1	0.0504252	0.000271424	0.000148575	0.000603679	0.0725305	0.00144983	0.000286218	0.000941954	0.0263635	0.0478723	0.0213574	0.0354814	0.000774439	0.00853567	0.0138226	0.00234892	0.00160842	0.00881516	0.0202397	0.00323664	0.00127648	0.0163956	0.00301716	0.0349901	0.0192408	0.00467696	0.222365	0.00973749	0.00656381	0.132053	0.143825	0.0318043	0.0371836	0.0197574
CAAACTATTGAGCTTC-1	0.0567854	0.000318381	0.000631031	8.55261e-05	0.0115205	0.0125193	0.00846479	0.00647568	0.140315	0.225139	0.00286719	0.0720969	0.00971249	0.030523	0.0269116	0.00598006	0.00952744	0.0591215	0.00928851	0.0174124	0.0208035	0.0208498	0.011311	0.0225584	0.00770467	0.000714015	0.017517	0.00908034	0.00502513	0.0222913	0.107309	0.00680236	0.00347587	0.038862
CAAACTCGCGACGCCG-1	0.00309695	0.0067761	0.0075252	0.000845191	0.0155867	0.108916	0.0312587	0.100433	0.241225	0.0100419	0.00264895	0.0016791	0.0121476	0.0270821	0.0310386	0.00227815	0.0291132	0.00559582	0.0274921	0.0257865	0.0289036	0.0327965	0.0152086	0.00230575	0.0323645	0.00694971	0.00389631	0.0118866	0.0235378	0.00575984	0.068568	0.016175	0.0343322	0.0267489
CAAAGATTATTGGGCC-1	0.00355117	0.00933993	0.0132044	0.00197064	0.0185685	0.128285	0.134931	0.15368	0.107362	0.0275142	0.00374447	0.00596985	0.0102785	0.023548	0.0302406	0.0074875	0.0127721	0.0198887	0.0339593	0.0118535	0.009214	0.0147188	0.0102218	0.0125178	0.00935662	0.0251545	0.0139239	0.00745516	0.0233662	0.0114123	0.0617531	0.0117707	0.00917742	0.0218082
CAAATCTCTCACAAGG-1	0.00344108	0.00324306	0.00608207	0.00219164	0.0184699	0.0862044	0.119914	0.112769	0.0294485	0.0512585	0.00523608	0.0261231	0.0153537	0.0248351	0.0555363	0.0164202	0.0152517	0.102742	0.0343597	0.0254816	0.0196088	0.0197127	0.00914395	0.0254262	0.00786369	0.0181864	0.0372625	0.00776006	0.0135668	0.0220307	0.0147993	0.0117918	0.0160644	0.0224209
CAAATGCGGAGTGTTC-1	0.0511799	0.00392791	0.00538366	0.00271863	0.0113235	0.0255174	0.0827206	0.0472812	0.0453332	0.0828911	0.0106934	0.0707834	0.00487643	0.00477534	0.016451	0.0217629	0.00128428	0.0610819	0.00990373	0.000743844	0.00305695	0.00377767	0.00412698	0.0356993	0.0118592	0.0243855	0.143915	0.00724069	0.00590919	0.0834953	0.0155906	0.0363675	0.0394636	0.0244791
CAAATGTCCTTCCGTG-1	0.00496645	0.0121604	0.0188524	0.0117721	0.0166073	0.0754738	0.125003	0.102559	0.0475278	0.0328009	0.0136788	0.0325265	0.0410433	0.0365879	0.0582841	0.0184182	0.0311746	0.0258719	0.011371	0.0154088	0.0112257	0.0228408	0.0101658	0.0180815	0.00855814	0.0233814	0.0115458	0.00981286	0.0252836	0.00743197	0.0513408	0.0277265	0.0116374	0.0288788
CAAATTGGATTATGCC-1	0.0541766	0.0202593	0.0172768	0.00982065	0.00987579	0.0562768	0.0528035	0.0819153	0.035775	0.0390653	0.00550839	0.0412134	0.0125868	0.0119488	0.0243301	0.0081629	0.00620949	0.028735	0.0183258	0.00603879	0.00317482	0.0203866	0.00769703	0.0219342	0.0143176	0.01519	0.124684	0.0108647	0.0145914	0.0791321	0.0519376	0.0235489	0.0310509	0.0411857
CAAATTGTCAGCAAGC-1	0.143594	0.0537247	0.20278	0.04095	0.00245584	0.0141071	0.00155308	0.00955644	0.0268272	0.00542791	0.000603222	0.0258407	0.00105087	0.00548283	0.0226476	0.105552	0.00884943	0.0640795	0.00106017	0.00218691	0.0016572	0.0138284	0.00310555	0.00151803	0.00231551	0.169519	0.000327855	0.00104101	0.00652804	0.000226872	0.0404531	0.0120041	0.00218061	0.00696583
CAACAGAATAACGCTA-1	0.00913307	0.00104468	0.00365425	0.00799525	0.00883514	0.0248018	0.0941793	0.00808844	0.0348657	0.104192	0.0252615	0.0597455	0.0736742	0.0172734	0.0742476	0.0245067	0.0173806	0.15378	0.00148689	0.0153068	0.0359549	0.00692615	0.016872	0.0567706	0.00275547	0.0015336	0.0100669	0.00970394	0.00555759	0.00691663	0.0340703	0.0114863	0.00336554	0.0385673
CAACAGTGCCAAACGG-1	0.025788	0.00253977	0.00234986	0.00237592	0.0129578	0.00829462	0.00286083	0.00678394	0.0202093	0.0696878	0.0361877	0.0333822	0.00460373	0.0114323	0.0125042	0.0181739	0.00247672	0.0271756	0.013939	0.00391246	0.00166077	0.0127897	0.00285581	0.0370134	0.0241911	0.0134496	0.196418	0.0114259	0.0110717	0.129546	0.0527882	0.0701719	0.0943835	0.0245996
CAACCAGTGGCCTACC-1	0.0284296	0.00436726	0.00848662	0.00439797	0.0104023	0.0606545	0.149342	0.0788153	0.0386779	0.0486702	0.0081162	0.0414651	0.0126547	0.00779951	0.0629207	0.0608552	0.00428571	0.0678442	0.0117632	0.00415938	0.0109241	0.00690566	0.00556063	0.0296332	0.00700031	0.0175122	0.0742616	0.00624333	0.010608	0.0379465	0.00906575	0.0107768	0.0122694	0.0471853
CAACCTACCGAGCAGT-1	0.00753355	0.00468214	0.0188076	0.00319901	0.0206622	0.0795341	0.16454	0.122091	0.050024	0.0543704	0.00491347	0.0117264	0.0304776	0.00729228	0.0390312	0.0303141	0.0119717	0.0354687	0.0253705	0.0132272	0.00985874	0.0239377	0.00466072	0.0139581	0.00895941	0.0212631	0.0281648	0.00902568	0.0202095	0.0169511	0.0386172	0.0156586	0.0106294	0.0428684
CAACGACCCGTTTACA-1	0.0129015	0.00512312	0.0146363	0.00600624	0.0154764	0.0392619	0.0195724	0.0380124	0.0609317	0.0818566	0.0119442	0.0114302	0.00795596	0.0170487	0.022059	0.00650927	0.0210407	0.018409	0.0161289	0.0110082	0.00470341	0.027023	0.00869104	0.0234621	0.0267949	0.0110208	0.133961	0.0179887	0.0197685	0.102741	0.0743486	0.0297489	0.0596228	0.0228126
CAACGCGATGAGCCAA-1	0.00383099	0.00176542	0.00180206	0.00800043	0.0138312	0.0131681	0.003399	0.00852659	0.0268349	0.0192868	0.0216961	0.0274336	0.00492021	0.0102772	0.0204855	0.0117632	0.00418761	0.0485617	0.0464375	0.00298629	0.00333489	0.037895	0.0062167	0.0396858	0.0279794	0.013833	0.204321	0.0149016	0.0173294	0.135958	0.0279297	0.068195	0.065725	0.0375008
CAACGGTTCTTGATAC-1	0.00322962	0.00230355	0.00554522	0.00648419	0.00937573	0.0155423	0.00244945	0.011188	0.0351388	0.0149225	0.0243931	0.010866	0.00156717	0.0145647	0.00885653	0.00580634	0.00667687	0.00956913	0.0183076	0.00772596	0.00139586	0.0162825	0.00467063	0.0310244	0.0364404	0.0097354	0.264935	0.0188908	0.0151528	0.175781	0.0485023	0.0545961	0.0816933	0.026386
CAACTATATCGAATGC-1	0.0173183	0.000541616	0.000237115	0.00147949	0.107874	0.00164103	0.00024679	0.00105959	0.0172162	0.0133398	0.0308242	0.0123247	0.000697122	0.00726906	0.0086492	0.00487029	0.00243045	0.0147174	0.0148991	0.00075496	0.00155028	0.0114276	0.00255553	0.0417891	0.0328676	0.0129378	0.278507	0.0141655	0.010982	0.149419	0.0687757	0.0462152	0.059445	0.0109725
CAACTCCAACGTTTAG-1	0.195919	0.0284261	0.121861	0.0384486	0.00639159	0.0390065	0.00661246	0.025602	0.0395924	0.0515858	0.0013708	0.0151673	0.0141771	0.00506186	0.00962532	0.0716403	0.018833	0.0378977	0.00963614	0.00623376	0.00704589	0.0234582	0.00537846	0.00234406	0.00609641	0.0623749	0.000632484	0.00335316	0.0099964	0.00121412	0.102305	0.0114894	0.00377519	0.0174476
CAACTCCTTGATCCCG-1	0.0120104	0.00423295	0.0130768	0.00302807	0.0102189	0.0424631	0.00857535	0.0265627	0.069879	0.0206638	0.016755	0.00531691	0.012767	0.0210674	0.0231362	0.00236927	0.0274495	0.0184464	0.0353958	0.0273198	0.00879508	0.0382426	0.00821517	0.0229618	0.0401829	0.0107076	0.129343	0.0225039	0.0361794	0.0963714	0.0641246	0.0339993	0.0567078	0.0309307
CAACTGCTCATCCGAT-1	0.00294306	0.00609106	0.0147576	0.0039266	0.0195386	0.120723	0.0275883	0.0796334	0.229201	0.0207885	0.00167296	0.00119806	0.0147706	0.0202902	0.0509818	0.00474886	0.0315961	0.0156218	0.0476326	0.0343194	0.0118796	0.0334759	0.00987313	0.00278953	0.0192158	0.00507647	0.00255909	0.00998674	0.0257079	0.00614016	0.0752422	0.00874232	0.0113768	0.0299116
CAACTTGTAGTGGGCA-1	0.0183282	0.0144546	0.00987046	0.00612821	0.00880068	0.0487213	0.0159038	0.0335872	0.0566156	0.0582342	0.0129624	0.025124	0.0363433	0.0225543	0.0502775	0.00236119	0.0256165	0.0187197	0.0382171	0.0235724	0.00852471	0.0319392	0.00728236	0.0223859	0.0218171	0.0103742	0.113335	0.017048	0.0194835	0.0697167	0.0541257	0.0247078	0.0401026	0.0327646
CAAGAGGGCGGAGTAC-1	0.00481814	0.00799766	0.0683174	0.0030348	0.0278713	0.111393	0.0831441	0.170298	0.0521056	0.020944	0.00644641	0.00263895	0.0107924	0.0188622	0.0128098	0.00546634	0.0338046	0.0327244	0.00767314	0.023768	0.00724913	0.0622351	0.0108988	0.00276981	0.0129599	0.0196307	0.00210032	0.00847711	0.0296314	0.0015801	0.0786919	0.0254747	0.012187	0.0212032
CAAGATATTATAACGT-1	0.0177421	0.021377	0.073105	0.0153181	0.0165253	0.115607	0.113616	0.182223	0.0143502	0.0547649	0.00211009	0.00827717	0.0132518	0.00808407	0.0112683	0.0554279	0.00660469	0.0185023	0.00260546	0.0196401	0.0099582	0.0256625	0.00270007	0.00672529	0.00378785	0.090019	0.00408396	0.00285444	0.0126152	0.00153324	0.0432746	0.0133433	0.00319356	0.00984759
CAAGCAACGTCGGAGT-1	0.0268421	0.00517699	0.00465803	0.00196499	0.0254406	0.0617998	0.19017	0.141546	0.0103867	0.0749124	0.00520797	0.0252953	0.00245743	0.00556769	0.0195227	0.021257	0.0010864	0.0289882	0.0036411	0.000843558	0.000319117	0.00418156	0.00342596	0.034067	0.00812614	0.0286887	0.109792	0.00554457	0.0131727	0.0542405	0.0157021	0.0264002	0.0202015	0.0193729
CAAGCACCAAATGCCT-1	0.0192367	0.00436337	0.0230192	0.00384736	0.23608	0.0477248	0.0909999	0.0690478	0.0210484	0.0784249	0.0073383	0.0111024	0.0249248	0.0100771	0.0336637	0.0500372	0.010031	0.0416088	0.00157449	0.00720506	0.0262076	0.0135491	0.00609266	0.00752911	0.00497632	0.015163	0.00258894	0.00676251	0.0138945	0.00175676	0.0582125	0.0193121	0.00450471	0.0280947
CAAGCGGCACATAATT-1	0.000578541	0.00885942	0.0416811	0.00479491	0.0181687	0.169926	0.0252243	0.131229	0.0478375	0.0108816	0.00358182	0.000554491	0.0111581	0.0469589	0.0272547	0.00197394	0.0441323	0.0168739	0.00886463	0.0381859	0.0231457	0.0742688	0.0105698	0.00106378	0.0125274	0.018538	0.000650933	0.010605	0.0304779	0.00183188	0.0928747	0.0131455	0.0167317	0.0348492
CAAGGATCGCATGTTC-1	0.0955078	0.00961252	0.0574588	0.00663969	0.0164119	0.0772505	0.103174	0.0900583	0.0819114	0.0411272	0.0014831	0.0208172	0.0317248	0.00569992	0.037126	0.0481957	0.0124877	0.0404821	0.00856803	0.0190782	0.0139222	0.0209359	0.00802384	0.00626631	0.00464889	0.0244938	0.00410935	0.0062892	0.0200348	0.00429181	0.0507076	0.00524292	0.00381813	0.0224008
CAAGGCCAGTGGTGCA-1	0.0186948	0.00363966	0.00446167	0.0009935	0.0112486	0.0676194	0.13304	0.0970007	0.115474	0.0659948	0.0026695	0.0223376	0.00905304	0.00401604	0.0358829	0.00947484	0.00767791	0.0261042	0.0117392	0.00502247	0.0227638	0.00706645	0.0233555	0.0260777	0.00952045	0.0165986	0.0697146	0.00900101	0.0181635	0.0400534	0.0217014	0.0188396	0.012402	0.0525982
CAAGGTCCTATAGGCT-1	0.0974414	0.0674603	0.146335	0.0329033	0.0263382	0.0638192	0.0605689	0.0701771	0.0258184	0.0127702	0.00105419	0.0185928	0.00393312	0.0061462	0.0175794	0.0824335	0.00915232	0.0450851	0.00346085	0.0093405	0.0061235	0.0252141	0.0107867	0.00549084	0.00538138	0.0456277	0.00269928	0.00455409	0.0163865	0.00233231	0.0414562	0.00599469	0.00369904	0.0238439
CAAGTAAGTGATAGAC-1	0.0244055	0.00530119	0.0188749	0.00455444	0.0163522	0.0580011	0.0572242	0.0538489	0.0775585	0.0643297	0.013204	0.0301528	0.0264366	0.0215429	0.082182	0.00684459	0.00845788	0.0348835	0.0443587	0.0185561	0.00874044	0.0274103	0.00849193	0.0133284	0.0116053	0.0149257	0.0483885	0.0124883	0.0193242	0.0406928	0.0555715	0.0214283	0.0158648	0.0346698
CAAGTCGTTGAAATCT-1	0.0495551	0.00615745	0.00565655	0.00384065	0.0149258	0.0446015	0.0844105	0.0822556	0.0318361	0.0913936	0.00820394	0.0420212	0.00351275	0.00988388	0.0138409	0.010682	0.00378957	0.0276433	0.0104234	0.0055482	0.00111278	0.0111672	0.00347354	0.0260532	0.0148302	0.0201283	0.143227	0.00804956	0.0110365	0.0864206	0.0411888	0.0212735	0.0335011	0.0283558
CAAGTGAACTTTGGTT-1	0.00835254	0.0020083	0.00443578	0.00867887	0.0166725	0.0268553	0.022569	0.0232829	0.0190227	0.0206042	0.0229236	0.0488101	0.0114188	0.0138337	0.032224	0.0036288	0.00386308	0.018457	0.0428263	0.00327878	0.00370629	0.014216	0.00391505	0.0335594	0.0295819	0.0142373	0.206627	0.0177711	0.0153382	0.144637	0.0361192	0.0370072	0.0643493	0.0251886
CAAGTGTGGTTGCAAA-1	0.0158909	0.00708137	0.0205164	0.0141429	0.0232906	0.0227787	0.0043663	0.0179746	0.0213086	0.0192821	0.0333144	0.0133332	0.00440186	0.0173564	0.0219807	0.0150384	0.00614095	0.0170704	0.0195281	0.0120221	0.00141697	0.0313972	0.00902187	0.0371227	0.0321538	0.0160432	0.191832	0.0211554	0.0249475	0.13336	0.0524642	0.0413906	0.0565458	0.0243304
CAATAAACCTTGGCCC-1	0.00767407	0.0102876	0.0146089	0.00305089	0.0194115	0.0589262	0.00978917	0.0381229	0.070098	0.0138153	0.00738001	0.0108606	0.0171171	0.0213709	0.0261962	0.00747131	0.0158742	0.0108824	0.0409875	0.0175091	0.00796322	0.0194106	0.00732541	0.0238951	0.02393	0.00849862	0.154313	0.0149741	0.025765	0.114004	0.0648999	0.0210123	0.0550863	0.0374886
CAATACGCTCTGAGGC-1	0.0230034	0.00230713	0.00399224	0.00201085	0.0134992	0.0608854	0.189415	0.103599	0.0254807	0.1213	0.0178096	0.0472547	0.0232568	0.0118071	0.0480242	0.0285625	0.00731807	0.0593705	0.00103063	0.00758844	0.0139025	0.00833659	0.0104168	0.042686	0.00213905	0.014849	0.0174409	0.00499692	0.005187	0.00720309	0.0342393	0.00706877	0.00292452	0.0310949
CAATATTCTTGACCTA-1	0.000480052	0.00699981	0.00764718	0.00216375	0.0198008	0.120526	0.0290438	0.0798634	0.127267	0.00824214	0.00156776	0.00188724	0.0140461	0.0129541	0.0540917	0.000654669	0.0406973	0.00307015	0.0708176	0.024967	0.0128511	0.0379375	0.0250147	0.0115205	0.0221963	0.00788792	0.0198825	0.0236825	0.0432038	0.022132	0.0398175	0.0190584	0.0249308	0.063097
CAATATTGGACTAGTG-1	0.269951	0.0403801	0.14143	0.0274408	0.000618935	0.00350416	0.000675895	0.00227173	0.0161612	0.000896324	0.0024272	0.0982124	0.00123226	0.00140692	0.0118618	0.118024	0.00159988	0.0653682	0.00180618	0.000529607	0.00232394	0.0129039	0.00237951	0.00406142	0.00238116	0.115456	0.00635373	0.000919886	0.00461166	0.00311629	0.0215347	0.00547049	0.00194646	0.0107426
CAATCCCTATACCAGC-1	0.0403699	0.000574119	0.000638745	0.000961014	0.193705	0.00288741	0.000387769	0.00160772	0.0244206	0.0310873	0.0269548	0.0237756	0.00153454	0.0119971	0.0180678	0.0140553	0.00268707	0.0187371	0.0345132	0.00152422	0.00313163	0.0195501	0.00333509	0.0216149	0.021034	0.00461045	0.159435	0.0101328	0.0101476	0.0965215	0.0996719	0.0305661	0.0431736	0.0265883
CAATCCTGCCGTGGAG-1	0.0365141	0.00141518	0.00141473	0.00139588	0.0105095	0.0115862	0.00307924	0.00635108	0.0350632	0.105464	0.0145524	0.0789979	0.013182	0.0250687	0.0188694	0.00404015	0.00784306	0.0220435	0.0220889	0.00615467	0.00254204	0.0123312	0.00680714	0.040933	0.028679	0.0128387	0.151787	0.0158326	0.00961614	0.100412	0.0705001	0.0451692	0.0517416	0.0251764
CAATGACCCTTAATTT-1	0.00784644	0.00838794	0.0143085	0.00777425	0.0216937	0.0710232	0.0270508	0.0545656	0.0434144	0.0272391	0.00855991	0.00706157	0.00747444	0.0304233	0.0232538	0.0048981	0.0241202	0.0205763	0.0226522	0.0299865	0.00819484	0.0533388	0.0151796	0.0156039	0.0247131	0.0160418	0.0863497	0.0278762	0.0421233	0.0678472	0.0527133	0.0451619	0.0359542	0.0465918
CAATGCGAGAAGTATC-1	0.0028635	0.00876611	0.0264128	0.00627358	0.0111356	0.0854473	0.0122982	0.051489	0.110245	0.0141819	0.0133234	0.0028183	0.0155491	0.017872	0.11485	0.000537351	0.0271995	0.0096137	0.0320787	0.0363048	0.007154	0.0585106	0.0123696	0.00795203	0.0269128	0.00788464	0.0523813	0.015692	0.0312499	0.039744	0.0579445	0.0147205	0.0296623	0.038562
CAATGGAATCTACATA-1	0.0947995	0.00562669	0.0157523	0.00782087	0.0804616	0.0192355	0.00476704	0.0117251	0.0306419	0.208483	0.00833246	0.0180692	0.00353692	0.0131167	0.0222048	0.0340656	0.00870024	0.0327294	0.0147007	0.00796066	0.00206667	0.00792083	0.00468025	0.0190841	0.014082	0.0183502	0.0536927	0.0109867	0.0100225	0.0387333	0.100848	0.025063	0.0201485	0.0315912
CAATGGATCTCTACCA-1	0.0587454	0.0126575	0.0144122	0.00472335	0.0219369	0.0960115	0.0244592	0.0903694	0.0937868	0.0299275	0.0047594	0.0094421	0.0145607	0.0154365	0.0420268	0.00470339	0.0128199	0.00621061	0.0368228	0.0457919	0.0231988	0.0624884	0.00841062	0.00965897	0.0172393	0.00788059	0.0403645	0.0139011	0.0213996	0.0275577	0.062531	0.0103621	0.0181454	0.0372583
CAATGGTCGGCCTGGG-1	0.0295036	0.00639063	0.0139185	0.00611814	0.0198221	0.0656553	0.0672943	0.0747402	0.0422817	0.0308049	0.0100002	0.014041	0.00641123	0.0156955	0.0100301	0.0105709	0.0127138	0.0219054	0.0170865	0.0146884	0.00225368	0.0258778	0.00463763	0.0184795	0.0231284	0.0311341	0.0998295	0.0129777	0.0167293	0.0762021	0.06335	0.0384394	0.0618258	0.0354628
CAATGTGCCAACCCTT-1	0.00666229	0.0109678	0.0185681	0.00385298	0.0249783	0.119489	0.0891836	0.120407	0.0736902	0.0445046	0.00536082	0.0059504	0.0226094	0.0210254	0.0697631	0.0029508	0.0245074	0.00515477	0.0153983	0.021465	0.0118604	0.0410513	0.0106345	0.0076701	0.0170381	0.0131926	0.00917731	0.0164075	0.0315979	0.0076898	0.0666272	0.012302	0.0163962	0.0318664
CAATTAAGGGTGATGA-1	0.0064457	0.00653648	0.0328827	0.0028446	0.016345	0.0955555	0.105056	0.107622	0.0466234	0.0731269	0.013159	0.00846852	0.0259638	0.0105372	0.0488289	0.0100069	0.0371638	0.0284594	0.00786416	0.0405278	0.0058435	0.0375637	0.0116072	0.00957117	0.0098982	0.0245969	0.00350582	0.00851711	0.0202653	0.0038179	0.0856713	0.014176	0.00696958	0.033978
CAATTGGGCCGCACTC-1	0.0299952	0.00574212	0.00458878	0.00168513	0.02308	0.0581632	0.187902	0.138765	0.0154396	0.0946717	0.00290989	0.0672196	0.00248402	0.00305286	0.0117516	0.0255763	0.000478147	0.0240909	0.0080775	0.000695525	0.000647772	0.00201942	0.00195249	0.0294583	0.004835	0.0315043	0.113227	0.00340144	0.00569259	0.0409122	0.0140783	0.0181304	0.0154436	0.0123289
CAATTTCGTATAAGGG-1	0.000745464	0.0155686	0.0242704	0.00394006	0.0345305	0.131359	0.0955406	0.141657	0.0333168	0.020107	0.0281826	0.00239235	0.00845049	0.012797	0.0851124	0.00853478	0.0183141	0.00610718	0.0109746	0.0352926	0.0183649	0.0277183	0.0066735	0.0037075	0.00781314	0.0272945	0.00273957	0.00792943	0.0305229	0.00259632	0.0514406	0.0187924	0.0105961	0.0666171
CACAAACCGCAGAACT-1	0.0101388	0.00862527	0.0545199	0.00331012	0.0454998	0.105022	0.0215304	0.0771028	0.125998	0.0105736	0.00463955	0.00107719	0.0127001	0.0161505	0.0423217	0.0129187	0.0530991	0.0104396	0.0257863	0.0257154	0.018401	0.0432845	0.00894017	0.00133794	0.0179914	0.0203823	0.000665166	0.0111668	0.0353474	0.00230156	0.0723715	0.00861918	0.0082552	0.0837666
CACAAGAAAGATATTA-1	0.00771076	0.00616175	0.0346663	0.00366396	0.0155454	0.0757637	0.141719	0.0897817	0.0489399	0.0706325	0.0372712	0.0227135	0.0536923	0.0108496	0.0458902	0.0191417	0.0366892	0.0351054	0.00578725	0.0346189	0.0104883	0.024393	0.0122666	0.00920815	0.00349976	0.0116328	0.00294892	0.00573588	0.0128129	0.00281712	0.0540479	0.0117375	0.00332662	0.0387402
CACAAGCTAAGAAAGG-1	0.0587359	0.00294447	0.00360815	0.00157803	0.00947769	0.0404574	0.120103	0.0842216	0.0174806	0.157521	0.00390124	0.0886083	0.011001	0.00765428	0.0137033	0.0286899	0.00289715	0.0308344	0.00595578	0.0010143	0.00225873	0.00553583	0.00370058	0.0320363	0.00703337	0.0298263	0.0784767	0.00486087	0.00721757	0.0465043	0.0400739	0.0174553	0.0142283	0.0204048
CACAATGAGCTGCTAT-1	0.0202229	0.00427353	0.00590813	0.00349062	0.0162754	0.0574754	0.254153	0.12092	0.0158492	0.0873005	0.00251997	0.0606962	0.0165109	0.00129947	0.0273956	0.0397437	0.00123618	0.0445077	0.00163735	0.00416429	0.0027365	0.00242387	0.00344142	0.0233661	0.00304872	0.0336616	0.0649367	0.00380271	0.00603733	0.0288504	0.00608696	0.00887776	0.00730404	0.0198457
CACACACGCTAACGAG-1	0.179481	0.156464	0.110775	0.030109	0.00193862	0.0236098	0.00202823	0.0136926	0.0389796	0.00107771	0.00443383	0.0176725	0.0027567	0.00862949	0.0366568	0.0838501	0.0116228	0.0692212	0.00871769	0.0109825	0.00287883	0.0191374	0.00406539	0.00123223	0.00311843	0.0544733	0.000219989	0.00191571	0.0133288	0.000253626	0.0602855	0.00493295	0.00214717	0.0193115
CACACAGCTTGCGCTC-1	0.0093074	0.0137664	0.0323439	0.0028309	0.0254354	0.1416	0.0386876	0.11533	0.152589	0.0255236	0.00153879	0.00109903	0.00583975	0.0146669	0.0490151	0.000749844	0.0247161	0.00733093	0.0495223	0.030461	0.0174274	0.0403821	0.00713338	0.00120536	0.0118279	0.00765369	0.00102718	0.00931584	0.0241825	0.00326359	0.0811679	0.00724405	0.00695028	0.0388657
CACACAGGGATAGATT-1	0.00428151	0.0143053	0.0195441	0.00480708	0.0238461	0.0917642	0.224164	0.168821	0.0155504	0.056896	0.00269156	0.0272833	0.00691587	0.00630598	0.0152841	0.0450869	0.00226323	0.024786	0.00278054	0.00405091	0.000925244	0.00708273	0.00503496	0.0230414	0.0039453	0.0502057	0.0270254	0.00453176	0.0183005	0.013051	0.0264233	0.0291892	0.0142135	0.0156024
CACACGCGCTGTCTTA-1	0.00671234	0.0124795	0.023652	0.0107656	0.0131719	0.0267512	0.00330617	0.02016	0.02818	0.0124511	0.020451	0.0044867	0.00318429	0.0244008	0.0139416	0.00936945	0.018875	0.00711332	0.0244469	0.0298097	0.00647347	0.0333165	0.00554356	0.022371	0.0342626	0.0176062	0.173002	0.017225	0.0171489	0.10844	0.0685469	0.0737306	0.0755925	0.0330325
CACACGTTTCAATGGG-1	0.040237	0.00105121	0.00422299	0.00219787	0.00995022	0.0189223	0.00411569	0.0116468	0.0984528	0.116258	0.0240008	0.0323226	0.00805598	0.00964636	0.0249944	0.00781933	0.00948334	0.0253564	0.0114545	0.0131031	0.00563485	0.0414114	0.00622339	0.0222661	0.0199843	0.0117035	0.10214	0.0121534	0.0171719	0.068776	0.118197	0.0326712	0.0423761	0.0259984
CACACTTGTATTGCGA-1	0.0237307	0.00822714	0.0420756	0.00356276	0.0274291	0.0717821	0.218056	0.138823	0.0141065	0.155076	0.000637846	0.0148122	0.0145323	0.00433241	0.00996278	0.0250299	0.00530291	0.0219778	0.00104644	0.00629699	0.00114856	0.00488379	0.00248381	0.0109258	0.00196049	0.0535827	0.00643533	0.0024375	0.00927905	0.00386558	0.0673828	0.0134394	0.00259155	0.012784
CACAGAGACGAGGACG-1	0.205159	0.0389455	0.124038	0.0291913	0.0046741	0.0355579	0.00607083	0.0182426	0.0453942	0.00515217	0.00314154	0.0560237	0.00456598	0.00673439	0.0175659	0.0905347	0.00466315	0.0589456	0.00839498	0.00539775	0.00958787	0.018022	0.00459197	0.00380485	0.00646553	0.0595	0.00487199	0.00487901	0.0189753	0.00475891	0.0672264	0.00870394	0.00489642	0.0153231
CACAGCACCCACGGCA-1	0.0263047	0.0064508	0.00622622	0.00245594	0.016673	0.081736	0.203853	0.167	0.0444432	0.0719974	0.00196901	0.0310377	0.00758113	0.0083123	0.0249031	0.0206185	0.00204813	0.0243639	0.00441547	0.00128722	0.00540793	0.00334147	0.00339018	0.0265165	0.00364257	0.037458	0.047157	0.00387949	0.00955377	0.0233135	0.0134296	0.0117632	0.00870431	0.0487657
CACAGCTAGGGAGTGA-1	0.0329827	0.0186376	0.124057	0.0165605	0.0171126	0.0924029	0.0937414	0.182273	0.0150437	0.0370478	0.00106827	0.0069548	0.00667475	0.00865896	0.0115591	0.0503529	0.012012	0.0221349	0.00172951	0.01649	0.00166066	0.0283727	0.0032694	0.00483654	0.00262448	0.0983261	0.00305051	0.00232367	0.0168048	0.00110979	0.0399035	0.015568	0.00379149	0.0108632
CACAGGGCCATATAGT-1	0.0737879	0.0220145	0.0507895	0.0080529	0.0122956	0.0581034	0.0614594	0.0722725	0.0315962	0.0323855	0.00741533	0.0347636	0.0176754	0.00908847	0.0272204	0.0554165	0.0179293	0.0352289	0.00932923	0.00594885	0.0257428	0.0174343	0.0097165	0.015024	0.011125	0.0448537	0.0545013	0.0125097	0.0137302	0.046316	0.0433919	0.0124663	0.0158387	0.0345763
CACAGGGCCGTTGTCA-1	0.00366234	0.00779903	0.00881525	0.00603206	0.0109013	0.0749226	0.115367	0.0782032	0.0316787	0.0475258	0.0072155	0.065926	0.0503968	0.0173164	0.0722205	0.0117989	0.0125468	0.0628	0.0112909	0.0233716	0.0232206	0.0151723	0.0223486	0.0377004	0.00805071	0.0178434	0.0329127	0.0142554	0.0118708	0.0217209	0.0157038	0.0164244	0.00907392	0.033911
CACAGTCCCGCTTCGC-1	0.0121289	0.00392601	0.00505625	0.00124782	0.00711207	0.0984102	0.107628	0.0869396	0.083981	0.0311772	0.0131135	0.0166145	0.0222611	0.00356918	0.0361818	0.0177027	0.0121723	0.0237201	0.0313617	0.00661209	0.0119057	0.0164957	0.0182444	0.0308092	0.0123158	0.0126305	0.0893904	0.0129592	0.0138724	0.0511186	0.0117942	0.0132405	0.0191223	0.0651851
CACATAAGGCGACCGT-1	0.301755	0.0224864	0.0582616	0.0135408	0.00326627	0.00628574	0.00189805	0.00417007	0.0139957	0.077325	0.00160546	0.0712885	0.00133347	0.00396549	0.00609189	0.0562	0.0020321	0.0640207	0.0102586	0.000888145	0.00174532	0.00356547	0.00253008	0.0156061	0.00845363	0.0603162	0.0736287	0.00332564	0.00374046	0.0320861	0.0397432	0.0156648	0.0100008	0.00892422
CACATATTAGCAGGAT-1	0.0105636	0.0163265	0.049205	0.00528903	0.0203261	0.114699	0.0144286	0.0861849	0.106823	0.0144494	0.020768	0.00353088	0.00818822	0.0180651	0.0155195	0.00182871	0.0192505	0.0349911	0.0172014	0.0340875	0.00603604	0.0604596	0.0126705	0.00379779	0.017223	0.0103952	0.0166789	0.0155891	0.051107	0.0151971	0.112333	0.0104058	0.0229743	0.0334057
CACATCGTGCACGCGC-1	0.0313943	0.0102962	0.0683386	0.00877268	0.0213572	0.0759197	0.148992	0.130966	0.0198551	0.0328823	0.00307346	0.0092356	0.00252203	0.0118385	0.014118	0.026008	0.00744064	0.0364314	0.00542237	0.0103109	0.00167565	0.0235527	0.00780467	0.0129129	0.00811509	0.0571481	0.0320637	0.00612543	0.0267725	0.0188612	0.0580369	0.0228464	0.0274588	0.0214507
CACATCTCACCGACGA-1	0.00711234	0.00804062	0.0427057	0.00728564	0.0516448	0.111072	0.045164	0.0860037	0.0398001	0.0125053	0.00393792	0.0016019	0.01002	0.0401205	0.0286856	0.00837677	0.0276711	0.02674	0.0284188	0.0558152	0.00832938	0.0577237	0.013523	0.00181883	0.0156188	0.0477252	0.00128707	0.0125296	0.0325022	0.00224872	0.0989999	0.0147725	0.0215625	0.0286367
CACATGATTCAGCAAC-1	0.0172844	0.00366837	0.00897176	0.00272905	0.0164986	0.0857974	0.15958	0.133109	0.0339634	0.0509411	0.00537396	0.0190821	0.00974197	0.0109238	0.0412258	0.0129648	0.01388	0.0269228	0.0104381	0.00402096	0.0313978	0.0183537	0.00749573	0.0192071	0.0105514	0.0288542	0.0584247	0.0104087	0.0169645	0.0353232	0.0343746	0.0177403	0.012157	0.0316299
CACATGTTTGGACATG-1	0.301011	0.0515499	0.0950762	0.0219177	0.000628679	0.00512519	0.000924377	0.0030224	0.0209528	0.0008994	0.000244068	0.0613976	0.000390658	0.00268297	0.0529043	0.166571	0.00250883	0.0535526	0.00308382	0.000825922	0.000949372	0.0134186	0.008319	0.00477694	0.00176193	0.0611398	0.000951386	0.00109204	0.00555083	0.000942605	0.0229196	0.00311371	0.00139094	0.0284037
CACATTCTTTCGATGG-1	0.028616	0.00143521	0.00348119	0.00424706	0.297838	0.00535617	0.000893355	0.00317359	0.0159512	0.0312304	0.0139187	0.0128482	0.00512902	0.0100169	0.0163101	0.0160756	0.00264724	0.025387	0.0108161	0.00204475	0.00558378	0.029369	0.00598804	0.0204918	0.0186021	0.00572318	0.0960791	0.0125153	0.0155584	0.0628423	0.0952966	0.0558589	0.0501694	0.0185059
CACATTTCTTGTCAGA-1	0.00732652	0.00698429	0.0356514	0.00380815	0.0148183	0.0393778	0.00602717	0.0244475	0.112384	0.0113488	0.0293031	0.0294942	0.0177107	0.0183436	0.0160567	0.00596332	0.0185902	0.0222961	0.0180576	0.0256689	0.00414343	0.0376306	0.00836536	0.0193336	0.0281449	0.0169163	0.114135	0.0158102	0.0284534	0.0790787	0.0686601	0.0278674	0.0443933	0.0434093
CACCAGTCAGCATGCA-1	0.0184241	0.0044866	0.00764598	0.00282921	0.0333718	0.0633342	0.0809587	0.0725488	0.0326942	0.0956363	0.0149541	0.0537673	0.0304058	0.0379371	0.0398168	0.00892937	0.0103824	0.0459289	0.0130299	0.0127794	0.0113856	0.0297431	0.0111657	0.0259581	0.0104038	0.0108266	0.0486539	0.0106579	0.0194133	0.0289691	0.0456605	0.0174346	0.0202145	0.0296522
CACCATCGGAGGAGAC-1	0.0200393	0.00739267	0.0136742	0.00362893	0.0142667	0.038596	0.0578794	0.0560721	0.0198298	0.0589569	0.0279162	0.0187715	0.00869507	0.0144958	0.0149089	0.017881	0.00840501	0.0332184	0.00808033	0.0155246	0.00259977	0.0164176	0.00428053	0.0312109	0.0198443	0.0345311	0.115099	0.0102458	0.0147908	0.0652156	0.0949155	0.062554	0.0525792	0.0174827
CACCATGATCGCAAAG-1	0.00415341	0.00970975	0.0305468	0.00550557	0.0315765	0.0987888	0.204529	0.205532	0.00951233	0.0887964	0.0024464	0.01125	0.0113555	0.00479514	0.00834077	0.0380441	0.00360433	0.0292089	0.00136803	0.00757703	0.00208363	0.013154	0.00277552	0.0096727	0.00196434	0.060874	0.00791177	0.00264673	0.0124288	0.00246525	0.0325644	0.0294596	0.00463968	0.0107187
CACCCAAATCTTATGT-1	0.0379948	0.0225277	0.0352104	0.00718945	0.010527	0.0239905	0.00527252	0.02273	0.0253964	0.0127342	0.0221382	0.0253436	0.00702288	0.00940557	0.0210694	0.0192574	0.00623724	0.028248	0.0156986	0.0125516	0.00345588	0.019211	0.00420201	0.028179	0.0265406	0.0357829	0.208939	0.0140527	0.0218858	0.126879	0.0392772	0.0322038	0.0443565	0.0244886
CACCCACACGTCACCC-1	0.00351624	0.00523607	0.0159024	0.00537616	0.0178248	0.0487233	0.00510505	0.0307471	0.0622906	0.0183186	0.0179857	0.0107547	0.00511756	0.0121961	0.0186139	0.00260671	0.0296073	0.0138387	0.0330251	0.0214884	0.00711598	0.0549456	0.00806874	0.0218831	0.0364609	0.0148154	0.158561	0.0189196	0.0203041	0.102172	0.0585919	0.0360379	0.0525553	0.0312938
CACCCACGAGGCAATT-1	0.182389	0.125746	0.121695	0.0510877	0.0638536	0.0137216	0.00125057	0.00855239	0.0204928	0.000913807	0.00266374	0.0113935	0.00132675	0.00433427	0.0278304	0.103923	0.00431498	0.0392672	0.00479281	0.0163312	0.00311257	0.0159995	0.00264387	0.000725406	0.00273671	0.0453301	0.000104996	0.00183563	0.0119068	0.000188141	0.0783132	0.00592529	0.00185082	0.0234469
CACCCGGTTTGTGACT-1	0.0120018	0.00635074	0.0154805	0.00367383	0.00902509	0.0629426	0.0105029	0.04161	0.122917	0.0725788	0.00234931	0.00700319	0.0169361	0.0253429	0.0466352	0.00481452	0.0199086	0.0151877	0.0719305	0.034255	0.00969433	0.0520252	0.0118933	0.00815129	0.0218953	0.0146929	0.0458058	0.0158858	0.0236659	0.0404585	0.0788951	0.0240056	0.0225301	0.0289545
CACCCTAACAAGATCT-1	0.00331407	0.00440311	0.019771	0.00252985	0.0194883	0.0698867	0.0112152	0.0565049	0.12112	0.0156308	0.00405548	0.00539299	0.0168007	0.0234028	0.0262614	0.0027132	0.0276773	0.0112912	0.0367774	0.0342187	0.00958711	0.0549916	0.0092463	0.00831331	0.025584	0.00914779	0.0554343	0.02426	0.0531588	0.0544521	0.0951154	0.0211919	0.0362679	0.0307942
CACCCTTGGTGAGACC-1	0.00813036	0.0123642	0.0282636	0.00620081	0.0273219	0.077647	0.0252423	0.0702891	0.0848717	0.040765	0.023017	0.00960686	0.0274039	0.0370735	0.0575912	0.00194958	0.014511	0.016963	0.0451558	0.0339683	0.0106425	0.0364521	0.00745855	0.00682399	0.0174022	0.00764463	0.0559987	0.0158233	0.0290392	0.046278	0.0587361	0.0132646	0.0180133	0.0280869
CACCCTTTCCTCGCTC-1	0.0344618	0.0014471	0.00136441	0.00192788	0.00878543	0.0119779	0.00209473	0.00655761	0.0339335	0.0901851	0.0192932	0.0293586	0.00531372	0.00808197	0.028808	0.00340462	0.0143353	0.0173328	0.0271252	0.0083855	0.0106468	0.0149418	0.00604626	0.0404879	0.030295	0.0111786	0.197086	0.0187616	0.0086857	0.136649	0.0505432	0.0359452	0.0536013	0.0309577
CACCGATACACCGAGC-1	0.112726	0.000318852	0.000469712	0.00035621	0.00723403	0.00551685	0.00105889	0.00279839	0.0413027	0.220481	0.0151593	0.0358399	0.0121397	0.00790624	0.02662	0.00237965	0.0096119	0.0129893	0.0236559	0.002661	0.00168479	0.0141483	0.0045483	0.0285553	0.017011	0.00255238	0.111351	0.0087003	0.0037337	0.0762953	0.112344	0.0210838	0.0222836	0.0344822
CACCGCCAGAAGGTTT-1	0.0292596	0.0201134	0.10092	0.0134535	0.0202381	0.105212	0.156523	0.194412	0.0119672	0.0488772	0.00111865	0.00794238	0.00367753	0.00451953	0.00740777	0.0494261	0.00300484	0.0232276	0.00104264	0.00230713	0.00192556	0.0193447	0.00454202	0.00679321	0.0020906	0.077374	0.00475454	0.00193939	0.0140391	0.00148894	0.0383292	0.0121638	0.00241892	0.00814523
CACCGCCGACCAGCGA-1	0.0140489	0.00393044	0.00619614	0.00347585	0.021942	0.069976	0.226244	0.143458	0.0173167	0.112865	0.000466976	0.0401509	0.017801	0.00324379	0.0289108	0.0502189	0.0022465	0.0464491	0.00119673	0.00992132	0.0079679	0.007988	0.0044816	0.0317157	0.00164104	0.0261267	0.0283063	0.00357057	0.00651543	0.0122843	0.0160272	0.00692529	0.00296967	0.0234214
CACCGCGTCCACTCTA-1	0.0115661	0.00321825	0.00595048	0.00442539	0.0128073	0.0536534	0.106406	0.0612783	0.0494409	0.0858099	0.0206992	0.0489644	0.0377102	0.0046412	0.0644741	0.0153278	0.0101648	0.0508448	0.00910088	0.0241555	0.0217439	0.00655806	0.0101604	0.0421216	0.00798635	0.0108759	0.0837378	0.0109804	0.00758932	0.0482828	0.0127533	0.012862	0.014613	0.0290966
[truncated: 2,953 more rows]
